# Supplementary material for: Differences in miRNA and mRNA Profile of Papillary Thyroid Cancer Variants
Source: Int J Endocrinol. 2016 Aug 30;2016:1427042. doi: 10.1155/2016/1427042 (PMC5021476; doi:10.1155/2016/1427042)
Supplement: Supplementary file 1 — Figure illustrates clustering of data due to batch effects present in TCGA miRNA and mRNA datasets (A, C). Samples sequenced in one batch are marked with the same color. After batch removal procedure clustering effects are not observed (B, D). Supplementary File 2. Figure illustrates analysis pipeline for 2 datasets - 466 samples. It provides overview how the study was designed. [file 1427042.f1.zip]

Archive with 5 entries (5 files):
- Supplementary Table S1 131201.xlsx
- Supplementary Table S2 131201.xlsx
- Supplementary Table S3 131201.xlsx
- Supplementary_File_1_Sample_Annotations_131121.txt
- supl_final.pdf
