# Supplementary material for: Differences in miRNA and mRNA Profile of Papillary Thyroid Cancer Variants
Source: Int J Endocrinol. 2016 Aug 30;2016:1427042. doi: 10.1155/2016/1427042 (PMC5021476; doi:10.1155/2016/1427042)
Supplement: Supplementary file 1 — Figure illustrates clustering of data due to batch effects present in TCGA miRNA and mRNA datasets (A, C). Samples sequenced in one batch are marked with the same color. After batch removal procedure clustering effects are not observed (B, D). Supplementary File 2. Figure illustrates analysis pipeline for 2 datasets - 466 samples. It provides overview how the study was designed. [file 1427042.f1.zip › Supplementary Table S1 131201.xlsx]

## Sheet: correlation_PTC_0.6_miranda_tar
miR position	gene id	correlation	p-value	FDR	mature mir	ensembl	p3 miranda	p5 miranda	coding miranda	p3 targetscan	p5 targetscan	coding targetscan	correlation in fvPTC
hg19:10:104196276-104196298:+	PHKB|5257	-0.749666	<1E-16	<1E-12	hsa-mir-146b	ENSG00000102893	1	0	1	1	0	1	-0.479326
hg19:10:104196276-104196298:+	TMEM164|84187	-0.680602	<1E-16	<1E-12	hsa-mir-146b	ENSG00000157600	1	0	0	1	0	1	-0.598731
hg19:9:73424947-73424969:-	LAD1|3898	-0.674524	<1E-16	<1E-12	hsa-mir-204	ENSG00000159166	1	0	0	0	1	1	-0.537737
hg19:17:57918633-57918655:+	BTBD11|121551	-0.67024	<1E-16	<1E-12	hsa-mir-21	ENSG00000151136	0	0	1	0	0	1	-0.485536
hg19:5:136983271-136983293:-	ITGB4|3691	-0.662295	<1E-16	<1E-12	hsa-mir-874	ENSG00000132470	0	0	1	0	0	1	-0.539447
hg19:9:73424947-73424969:-	ERBB3|2065	-0.657366	<1E-16	<1E-12	hsa-mir-204	ENSG00000065361	0	0	1	1	1	1	-0.463822
hg19:6:72086667-72086689:-	EHBP1L1|254102	-0.656808	<1E-16	<1E-12	hsa-mir-30c-2	ENSG00000173442	0	0	1	0	0	1	-0.489867
hg19:10:104196276-104196298:+	IRAK1|3654	-0.654807	<1E-16	<1E-12	hsa-mir-146b	ENSG00000184216	1	0	1	1	0	1	-0.45054
hg19:6:72113257-72113277:-	TNFSF11|8600	-0.654745	<1E-16	<1E-12	hsa-mir-30a	ENSG00000120659	1	0	0	1	0	0	-0.30461
hg19:6:72086667-72086689:-	RAP2B|5912	-0.65279	<1E-16	<1E-12	hsa-mir-30c-2	ENSG00000181467	1	0	0	1	0	0	-0.32631
hg19:10:104196277-104196297:+	DNTT|1791	-0.652561	<1E-16	<1E-12	hsa-mir-146b	ENSG00000107447	0	0	1	0	1	1	-0.591243
hg19:10:104196276-104196298:+	FHOD3|80206	-0.652523	<1E-16	<1E-12	hsa-mir-146b	ENSG00000134775	0	0	1	0	0	1	-0.455881
hg19:9:73424947-73424969:-	POU2F3|25833	-0.651226	<1E-16	<1E-12	hsa-mir-204	ENSG00000137709	0	1	1	1	0	0	-0.41932
hg19:6:72086667-72086689:-	IFI16|3428	-0.648118	<1E-16	<1E-12	hsa-mir-30c-2	ENSG00000163565	0	0	1	0	0	1	-0.446836
hg19:6:72086667-72086689:-	RUNX1|861	-0.64688	<1E-16	<1E-12	hsa-mir-30c-2	ENSG00000159216	1	0	0	0	1	0	-0.32892
hg19:17:57918633-57918655:+	COL25A1|84570	-0.645142	<1E-16	<1E-12	hsa-mir-21	ENSG00000188517	0	0	1	0	0	1	-0.38835
hg19:10:104196277-104196296:+	SLC27A4|10999	-0.644276	<1E-16	<1E-12	hsa-mir-146b	ENSG00000167114	0	0	1	0	0	1	-0.68414
hg19:17:57918633-57918656:+	IGDCC3|9543	-0.642679	<1E-16	<1E-12	hsa-mir-21	ENSG00000174498	0	0	1	1	0	0	-0.462419
hg19:6:72086667-72086689:-	MMP14|4323	-0.640197	<1E-16	<1E-12	hsa-mir-30c-2	ENSG00000157227	1	0	0	0	0	1	-0.297102
hg19:9:73424947-73424969:-	PRSS22|64063	-0.639908	<1E-16	<1E-12	hsa-mir-204	ENSG00000005001	0	0	1	0	0	1	-0.305207
hg19:6:72086707-72086729:-	FN1|2335	-0.639075	<1E-16	<1E-12	hsa-mir-30c-2	ENSG00000115414	1	0	1	0	0	1	-0.642014
hg19:6:72113256-72113278:-	NFE2L3|9603	-0.637626	<1E-16	<1E-12	hsa-mir-30a	ENSG00000050344	0	0	1	0	0	1	-0.340876
hg19:6:72113257-72113277:-	CDH11|1009	-0.635954	<1E-16	<1E-12	hsa-mir-30a	ENSG00000140937	0	1	0	1	0	1	-0.451453
hg19:12:54731062-54731084:+	ANXA2|302	-0.634367	<1E-16	<1E-12	hsa-mir-148b	ENSG00000182718	0	1	1	0	1	1	-0.585318
hg19:1:41220086-41220107:+	RUNX1|861	-0.631348	<1E-16	<1E-12	hsa-mir-30e	ENSG00000159216	1	0	0	1	0	0	-0.495581
hg19:17:57918634-57918657:+	FLT1|2321	-0.630495	<1E-16	<1E-12	hsa-mir-21	ENSG00000102755	0	0	1	0	1	1	-0.441226
hg19:17:57918633-57918655:+	TUBB1|81027	-0.627576	<1E-16	<1E-12	hsa-mir-21	ENSG00000101162	0	0	1	1	0	0	-0.42326
hg19:9:21512157-21512178:-	BAP1|8314	-0.626667	<1E-16	<1E-12	hsa-mir-31	ENSG00000163930	0	0	1	1	0	0	-0.650029
hg19:2:219866370-219866391:-	PHKB|5257	-0.626539	<1E-16	<1E-12	hsa-mir-375	ENSG00000102893	0	0	1	0	1	0	-0.362846
hg19:17:57918633-57918656:+	SAMD13|148418	-0.625901	<1E-16	<1E-12	hsa-mir-21	ENSG00000203943	0	1	0	0	1	0	-0.318925
hg19:17:57918634-57918655:+	SYNM|23336	-0.625333	<1E-16	<1E-12	hsa-mir-21	ENSG00000182253	1	0	0	0	0	1	-0.578189
hg19:10:104196277-104196296:+	TRPM3|80036	-0.625145	<1E-16	<1E-12	hsa-mir-146b	ENSG00000083067	1	0	0	0	0	1	-0.45101
hg19:5:136983271-136983293:-	FAM65B|9750	-0.624591	<1E-16	<1E-12	hsa-mir-874	ENSG00000111913	1	0	0	0	1	0	-0.603727
hg19:10:104196277-104196301:+	FLRT1|23769	-0.62457	<1E-16	<1E-12	hsa-mir-146b	ENSG00000126500	0	0	1	0	1	0	-0.658963
hg19:17:57918633-57918656:+	PAX6|5080	-0.623921	<1E-16	<1E-12	hsa-mir-21	ENSG00000007372	1	0	0	0	1	0	-0.317515
hg19:10:104196277-104196297:+	SH2D6|284948	-0.622839	<1E-16	<1E-12	hsa-mir-146b	ENSG00000152292	0	1	0	0	1	0	-0.651232
hg19:X:45605609-45605630:-	ZNF652|22834	-0.621909	<1E-16	<1E-12	hsa-mir-221	ENSG00000198740	1	0	0	0	0	1	-0.732552
hg19:17:57918633-57918655:+	DIRAS2|54769	-0.621281	<1E-16	<1E-12	hsa-mir-21	ENSG00000165023	1	0	0	0	0	1	-0.474943
hg19:9:73424947-73424969:-	SLC34A2|10568	-0.620889	<1E-16	<1E-12	hsa-mir-204	ENSG00000157765	0	0	1	0	0	1	-0.509709
hg19:3:168269702-168269723:+	PHKB|5257	-0.619368	<1E-16	<1E-12	hsa-mir-551b	ENSG00000102893	0	1	1	1	1	1	-0.341697
hg19:10:104196313-104196333:+	NCAM1|4684	-0.618731	<1E-16	<1E-12	hsa-mir-146b	ENSG00000262279	1	0	1	0	1	1	-0.594656
hg19:1:41220086-41220107:+	SLC27A6|28965	-0.618396	<1E-16	<1E-12	hsa-mir-30e	ENSG00000113396	0	1	1	0	0	1	-0.606979
hg19:9:73424947-73424969:-	NPTXR|23467	-0.618271	<1E-16	<1E-12	hsa-mir-204	ENSG00000221890	1	0	0	1	0	0	-0.397415
hg19:10:104196277-104196297:+	ACSF2|80221	-0.618094	<1E-16	<1E-12	hsa-mir-146b	ENSG00000167107	1	0	1	0	1	0	-0.70794
hg19:14:100774213-100774235:+	NFE2L3|9603	-0.617372	<1E-16	<1E-12	hsa-mir-345	ENSG00000050344	0	0	1	1	0	0	-0.477613
hg19:17:57918634-57918654:+	C16orf71|146562	-0.616591	<1E-16	<1E-12	hsa-mir-21	ENSG00000166246	1	0	0	0	1	0	-0.400973
hg19:10:104196277-104196297:+	SLC4A4|8671	-0.61632	<1E-16	<1E-12	hsa-mir-146b	ENSG00000080493	1	0	0	0	0	1	-0.738886
hg19:17:57918672-57918692:+	TSPAN7|7102	-0.61601	<1E-16	<1E-12	hsa-mir-21	ENSG00000156298	1	1	0	0	0	1	-0.300965
hg19:17:56408607-56408628:-	ZNF684|127396	-0.615455	<1E-16	<1E-12	hsa-mir-142	ENSG00000117010	1	0	0	0	0	1	-0.208152
hg19:10:104196313-104196334:+	ARHGAP24|83478	-0.615445	<1E-16	<1E-12	hsa-mir-146b	ENSG00000138639	0	0	1	0	0	1	-0.542812
hg19:10:104196277-104196299:+	OGDH|4967	-0.614206	<1E-16	<1E-12	hsa-mir-146b	ENSG00000105953	0	0	1	0	0	1	-0.624888
hg19:10:104196276-104196298:+	IGF2BP3|10643	-0.614008	<1E-16	<1E-12	hsa-mir-146b	ENSG00000136231	1	0	1	1	0	0	-0.597097
hg19:9:73424947-73424969:-	SERPINA1|5265	-0.613802	<1E-16	<1E-12	hsa-mir-204	ENSG00000197249	1	0	0	0	1	1	-0.459839
hg19:10:104196277-104196296:+	MMEL1|79258	-0.612985	<1E-16	<1E-12	hsa-mir-146b	ENSG00000142606	1	0	1	0	0	1	-0.597298
hg19:17:1617207-1617230:-	PHF17|79960	-0.612982	<1E-16	<1E-12	hsa-mir-22	ENSG00000077684	1	0	0	1	1	1	-0.476034
hg19:21:26946295-26946319:+	MAPK10|5602	-0.612188	<1E-16	<1E-12	hsa-mir-155	ENSG00000109339	1	0	1	1	0	1	-0.304947
hg19:6:72086709-72086729:-	FAP|2191	-0.612115	<1E-16	<1E-12	hsa-mir-30c-2	ENSG00000078098	1	0	1	0	0	1	-0.496054
hg19:6:72113297-72113319:-	MYO9B|4650	-0.611677	<1E-16	<1E-12	hsa-mir-30a	ENSG00000099331	0	0	1	0	0	1	-0.534202
hg19:6:72086709-72086729:-	ARNTL2|56938	-0.611431	<1E-16	<1E-12	hsa-mir-30c-2	ENSG00000029153	1	0	0	1	0	0	-0.330575
hg19:17:57918633-57918655:+	LCLAT1|253558	-0.611427	<1E-16	<1E-12	hsa-mir-21	ENSG00000172954	0	0	1	1	0	0	-0.358647
hg19:10:104196277-104196297:+	SLC22A23|63027	-0.611176	<1E-16	<1E-12	hsa-mir-146b	ENSG00000137266	1	0	0	0	1	1	-0.711896
hg19:12:54731062-54731084:+	RUNX1|861	-0.610374	<1E-16	<1E-12	hsa-mir-148b	ENSG00000159216	1	1	0	1	1	1	-0.504154
hg19:17:57918634-57918657:+	KCNJ13|3769	-0.609436	<1E-16	<1E-12	hsa-mir-21	ENSG00000115474	1	0	1	1	0	0	-0.269029
hg19:17:57918672-57918692:+	GDF9|2661	-0.609433	<1E-16	<1E-12	hsa-mir-21	ENSG00000164404	0	0	1	0	1	0	-0.305553
hg19:17:57918633-57918656:+	PARK2|5071	-0.609184	<1E-16	<1E-12	hsa-mir-21	ENSG00000185345	0	1	1	1	0	0	-0.270415
hg19:9:73424946-73424969:-	PTPRE|5791	-0.608809	<1E-16	<1E-12	hsa-mir-204	ENSG00000132334	0	1	0	0	1	0	-0.478765
hg19:9:73424947-73424969:-	PLEKHN1|84069	-0.607975	<1E-16	<1E-12	hsa-mir-204	ENSG00000187583	0	0	1	0	0	1	-0.55013
hg19:14:100774213-100774235:+	DST|667	-0.60715	<1E-16	<1E-12	hsa-mir-345	ENSG00000151914	1	1	1	1	0	1	-0.376438
hg19:17:57918633-57918654:+	KCNQ1|3784	-0.606917	<1E-16	<1E-12	hsa-mir-21	ENSG00000053918	0	0	1	0	0	1	-0.484535
hg19:9:73424947-73424969:-	ENDOD1|23052	-0.606819	<1E-16	<1E-12	hsa-mir-204	ENSG00000149218	1	0	0	1	0	0	-0.599493
hg19:10:104196315-104196335:+	LGI3|203190	-0.606704	<1E-16	<1E-12	hsa-mir-146b	ENSG00000168481	1	0	0	1	0	0	-0.622985
hg19:10:104196277-104196297:+	ZNF652|22834	-0.606191	<1E-16	<1E-12	hsa-mir-146b	ENSG00000198740	1	0	0	1	0	0	-0.506501
hg19:17:57918633-57918655:+	TBCE|6905	-0.606023	<1E-16	<1E-12	hsa-mir-21	ENSG00000116957	0	0	1	0	0	1	-0.421349
hg19:10:104196277-104196296:+	GALNT10|55568	-0.605468	<1E-16	<1E-12	hsa-mir-146b	ENSG00000164574	1	0	0	1	0	1	-0.187207
hg19:10:104196276-104196299:+	ZMAT4|79698	-0.605409	<1E-16	<1E-12	hsa-mir-146b	ENSG00000165061	1	0	0	0	1	0	-0.653205
hg19:9:73424947-73424969:-	MET|4233	-0.605239	<1E-16	<1E-12	hsa-mir-204	ENSG00000105976	0	0	1	0	0	1	-0.473939
hg19:10:104196277-104196297:+	ZNF536|9745	-0.604711	<1E-16	<1E-12	hsa-mir-146b	ENSG00000198597	0	0	1	0	1	1	-0.630421
hg19:10:104196277-104196299:+	RAVER2|55225	-0.604537	<1E-16	<1E-12	hsa-mir-146b	ENSG00000162437	1	0	0	0	0	1	-0.666236
hg19:5:136983270-136983293:-	CD97|976	-0.604513	<1E-16	<1E-12	hsa-mir-874	ENSG00000123146	1	0	1	0	0	1	-0.579332
hg19:X:45605610-45605631:-	NDRG2|57447	-0.604198	<1E-16	<1E-12	hsa-mir-221	ENSG00000165795	0	1	1	0	1	1	-0.537984
hg19:6:72113257-72113277:-	CMTM3|123920	-0.60405	<1E-16	<1E-12	hsa-mir-30a	ENSG00000140931	1	0	0	1	0	0	-0.388435
hg19:6:72086667-72086689:-	MRC1|4360	-0.60387	<1E-16	<1E-12	hsa-mir-30c-2	ENSG00000260314	1	0	0	0	0	1	-0.338258
hg19:10:104196277-104196297:+	NWD1|284434	-0.602495	<1E-16	<1E-12	hsa-mir-146b	ENSG00000188039	1	0	1	0	0	1	-0.471257
hg19:10:104196277-104196295:+	SORBS2|8470	-0.60236	<1E-16	<1E-12	hsa-mir-146b	ENSG00000154556	0	1	0	0	1	1	-0.459388
hg19:17:57918633-57918656:+	LMAN2L|81562	-0.602331	<1E-16	<1E-12	hsa-mir-21	ENSG00000114988	1	0	1	0	0	1	-0.411819
hg19:9:21512157-21512178:-	PFKFB2|5208	-0.601869	<1E-16	<1E-12	hsa-mir-31	ENSG00000123836	1	0	0	1	0	0	-0.54046
hg19:17:57918634-57918655:+	FAM65C|140876	-0.601775	<1E-16	<1E-12	hsa-mir-21	ENSG00000042062	1	0	0	1	0	0	-0.498463
hg19:9:73424946-73424969:-	SPTBN2|6712	-0.601625	<1E-16	<1E-12	hsa-mir-204	ENSG00000173898	1	1	0	0	1	1	-0.437872
hg19:17:57918672-57918691:+	ZNF546|339327	-0.60152	<1E-16	<1E-12	hsa-mir-21	ENSG00000187187	0	0	1	1	0	0	-0.443041
hg19:1:41220044-41220066:+	ANXA2|302	-0.601375	<1E-16	<1E-12	hsa-mir-30e	ENSG00000182718	0	1	1	0	1	0	-0.569496
hg19:9:73424948-73424969:-	GALE|2582	-0.600952	<1E-16	<1E-12	hsa-mir-204	ENSG00000117308	0	1	1	0	1	0	-0.369679
hg19:6:72113257-72113277:-	CD97|976	-0.600648	<1E-16	<1E-12	hsa-mir-30a	ENSG00000123146	0	0	1	0	0	1	-0.494372
hg19:10:104196277-104196300:+	TPO|7173	-0.600272	<1E-16	<1E-12	hsa-mir-146b	ENSG00000115705	1	0	1	0	0	1	-0.577027
hg19:9:97847787-97847809:+	GALNT1|2589	-0.600234	<1E-16	<1E-12	hsa-mir-27b	ENSG00000141429	1	1	0	1	0	1	-0.333833
hg19:1:41220086-41220107:+	MICAL2|9645	-0.600105	<1E-16	<1E-12	hsa-mir-30e	ENSG00000133816	1	0	1	0	0	1	-0.448135
hg19:9:73424947-73424969:-	KCNQ3|3786	-0.600043	<1E-16	<1E-12	hsa-mir-204	ENSG00000184156	0	0	1	0	1	1	-0.637007
hg19:3:168269702-168269723:+	ZMAT4|79698	-0.600003	<1E-16	<1E-12	hsa-mir-551b	ENSG00000165061	1	0	1	1	0	0	-0.58647
