# Supplementary material for: Differences in miRNA and mRNA Profile of Papillary Thyroid Cancer Variants
Source: Int J Endocrinol. 2016 Aug 30;2016:1427042. doi: 10.1155/2016/1427042 (PMC5021476; doi:10.1155/2016/1427042)
Supplement: Supplementary file 1 — Figure illustrates clustering of data due to batch effects present in TCGA miRNA and mRNA datasets (A, C). Samples sequenced in one batch are marked with the same color. After batch removal procedure clustering effects are not observed (B, D). Supplementary File 2. Figure illustrates analysis pipeline for 2 datasets - 466 samples. It provides overview how the study was designed. [file 1427042.f1.zip › Supplementary Table S2 131201.xlsx]

## Sheet: correlation_fvPTC_0.6_miranda_t
miR position	gene id	correlation	p-value	FDR	mature mir	ensembl	p3 miranda	p5 miranda	coding miranda	p3 targetscan	p5 targetscan	coding targetscan	correlation in cPTC
hg19:5:136983269-136983293:-	LASP1|3927	-0.785506	<1e-16	<1e-12	hsa-mir-874	ENSG00000002834	1	0	1	1	0	1	-0.408397
hg19:16:15737158-15737180:+	MET|4233	-0.728707	<1e-16	<1e-12	hsa-mir-484	ENSG00000105976	1	0	0	0	0	1	-0.446913
hg19:17:46114539-46114561:-	LIPH|200879	-0.723826	<1e-16	<1e-12	hsa-mir-152	ENSG00000163898	1	0	0	0	0	1	-0.500816
hg19:5:136983269-136983293:-	SHF|90525	-0.714492	<1e-16	<1e-12	hsa-mir-874	ENSG00000138606	0	0	1	1	0	0	-0.292231
hg19:5:136983269-136983293:-	LMNA|4000	-0.713882	<1e-16	<1e-12	hsa-mir-874	ENSG00000160789	1	1	0	0	0	1	-0.401937
hg19:17:46114539-46114561:-	QSOX1|5768	-0.709396	2.22e-16	3.89e-12	hsa-mir-152	ENSG00000116260	1	0	0	1	0	1	-0.52832
hg19:17:46114539-46114561:-	PRR15|222171	-0.707621	2.22e-16	3.89e-12	hsa-mir-152	ENSG00000176532	1	0	0	1	0	0	-0.498732
hg19:12:54731062-54731084:+	CD276|80381	-0.70705	4.44e-16	6.83e-12	hsa-mir-148b	ENSG00000103855	0	1	0	1	0	1	-0.527993
hg19:5:136983269-136983293:-	PTK7|5754	-0.705735	4.44e-16	6.83e-12	hsa-mir-874	ENSG00000112655	1	0	1	0	0	1	-0.515031
hg19:17:46114539-46114561:-	CORO2A|7464	-0.70388	4.44e-16	6.83e-12	hsa-mir-152	ENSG00000106789	1	0	0	1	0	0	-0.565455
hg19:5:136983269-136983293:-	GNAI2|2771	-0.703839	4.44e-16	6.83e-12	hsa-mir-874	ENSG00000263156	1	0	0	0	0	1	-0.347384
hg19:17:46114539-46114561:-	TGFA|7039	-0.703026	4.44e-16	6.83e-12	hsa-mir-152	ENSG00000163235	0	1	0	1	0	0	-0.420097
hg19:6:72086708-72086729:-	GARS|2617	-0.697221	1.11e-15	1.54e-11	hsa-mir-30c-2	ENSG00000106105	0	0	1	0	0	1	-0.468956
hg19:17:46114539-46114561:-	TRIM14|9830	-0.696539	1.33e-15	1.78e-11	hsa-mir-152	ENSG00000106785	1	0	0	1	0	0	-0.495581
hg19:12:54731062-54731084:+	COL8A2|1296	-0.696506	1.33e-15	1.78e-11	hsa-mir-148b	ENSG00000171812	1	0	0	1	0	0	-0.512599
hg19:9:97848344-97848366:-	LPAR5|57121	-0.696326	1.33e-15	1.78e-11	hsa-mir-3074	ENSG00000184574	0	0	1	0	1	0	-0.520116
hg19:9:97848344-97848366:-	IL1RAP|3556	-0.691953	2.22e-15	2.74e-11	hsa-mir-3074	ENSG00000196083	1	0	1	1	0	0	-0.448439
hg19:5:136983269-136983293:-	PRKD2|25865	-0.691486	2.22e-15	2.74e-11	hsa-mir-874	ENSG00000105287	0	1	1	0	0	1	-0.34181
hg19:10:104196277-104196297:+	MMEL1|79258	-0.685708	4.88e-15	5.32e-11	hsa-mir-146b	ENSG00000142606	1	0	1	0	0	1	-0.664574
hg19:5:136983269-136983293:-	MXRA8|54587	-0.685457	4.88e-15	5.32e-11	hsa-mir-874	ENSG00000162576	1	1	0	1	0	0	-0.424058
hg19:8:22102486-22102509:-	PGR|5241	-0.684139	5.77e-15	6.12e-11	hsa-mir-320a	ENSG00000082175	0	1	1	1	0	0	-0.303864
hg19:5:136983269-136983293:-	MAMLD1|10046	-0.683255	6.66e-15	6.9e-11	hsa-mir-874	ENSG00000013619	1	0	1	1	0	1	-0.338582
hg19:5:148441937-148441958:-	NELL2|4753	-0.681499	8.22e-15	8.22e-11	hsa-mir-584	ENSG00000184613	0	0	1	0	1	1	-0.22558
hg19:6:72086705-72086729:-	RUNX2|860	-0.680897	8.88e-15	8.76e-11	hsa-mir-30c-2	ENSG00000124813	1	0	1	0	0	1	-0.369107
hg19:10:104196277-104196296:+	SNTA1|6640	-0.679045	1.11e-14	1.05e-10	hsa-mir-146b	ENSG00000101400	0	0	1	0	1	0	-0.44213
hg19:17:46114539-46114561:-	MST1R|4486	-0.6784	1.2e-14	1.12e-10	hsa-mir-152	ENSG00000164078	1	0	0	0	0	1	-0.482609
hg19:22:20020676-20020698:+	CNTNAP1|8506	-0.678328	1.22e-14	1.14e-10	hsa-mir-185	ENSG00000108797	1	0	0	0	0	1	-0.294572
hg19:9:97848344-97848366:-	DPP4|1803	-0.676752	1.49e-14	1.35e-10	hsa-mir-3074	ENSG00000197635	1	0	0	1	0	0	-0.46144
hg19:5:136983269-136983293:-	COL7A1|1294	-0.676564	1.51e-14	1.37e-10	hsa-mir-874	ENSG00000114270	1	0	1	0	0	1	-0.439539
hg19:X:45605607-45605631:-	ZNF652|22834	-0.676293	1.55e-14	1.4e-10	hsa-mir-221	ENSG00000198740	1	0	0	0	0	1	-0.444686
hg19:10:104196276-104196299:+	TMEM164|84187	-0.676226	1.58e-14	1.42e-10	hsa-mir-146b	ENSG00000157600	1	0	0	1	0	1	-0.685637
hg19:14:100774213-100774232:+	RASGRF1|5923	-0.674197	2.02e-14	1.75e-10	hsa-mir-345	ENSG00000058335	0	0	1	0	1	1	-0.347872
hg19:5:136983269-136983293:-	RARG|5916	-0.673465	2.22e-14	1.89e-10	hsa-mir-874	ENSG00000172819	0	1	0	1	0	1	-0.366889
hg19:12:54731062-54731084:+	SCARA3|51435	-0.672066	2.62e-14	2.16e-10	hsa-mir-148b	ENSG00000168077	0	1	0	1	0	1	-0.465916
hg19:5:136983269-136983293:-	BMP1|649	-0.671443	2.82e-14	2.3e-10	hsa-mir-874	ENSG00000168487	0	1	0	1	0	1	-0.297116
hg19:5:136983269-136983293:-	CDC25B|994	-0.670287	3.24e-14	2.58e-10	hsa-mir-874	ENSG00000101224	0	1	1	1	0	0	-0.372157
hg19:17:1617208-1617229:-	CLU|1191	-0.66952	3.55e-14	2.79e-10	hsa-mir-22	ENSG00000120885	1	1	0	1	1	1	-0.467234
hg19:12:54731062-54731084:+	TTC39C|125488	-0.668083	4.22e-14	3.22e-10	hsa-mir-148b	ENSG00000168234	1	1	1	0	1	0	-0.480216
hg19:10:104196314-104196337:+	ARHGAP24|83478	-0.667602	4.46e-14	3.37e-10	hsa-mir-146b	ENSG00000138639	0	0	1	0	0	1	-0.514163
hg19:22:20020676-20020698:+	LMNA|4000	-0.666871	4.86e-14	3.62e-10	hsa-mir-185	ENSG00000160789	1	0	1	1	1	1	-0.255431
hg19:5:85916360-85916384:+	CYSLTR2|57105	-0.665221	5.91e-14	4.25e-10	hsa-mir-3607	ENSG00000152207	1	0	0	1	0	0	-0.231524
hg19:7:25989540-25989564:-	C1orf116|79098	-0.662296	8.3e-14	5.65e-10	hsa-mir-148a	ENSG00000182795	0	1	1	1	1	1	-0.494991
hg19:17:46114539-46114561:-	NAB2|4665	-0.660713	9.97e-14	6.58e-10	hsa-mir-152	ENSG00000166886	0	0	1	0	0	1	-0.381019
hg19:17:57918634-57918652:+	BTBD11|121551	-0.660078	1.07e-13	6.99e-10	hsa-mir-21	ENSG00000151136	0	0	1	0	0	1	-0.699501
hg19:6:72086706-72086729:-	TMEM92|162461	-0.659976	1.09e-13	7.06e-10	hsa-mir-30c-2	ENSG00000167105	1	0	0	1	0	0	-0.424509
hg19:10:104196277-104196297:+	GFOD2|81577	-0.65895	1.22e-13	7.77e-10	hsa-mir-146b	ENSG00000141098	0	0	1	1	0	0	-0.408244
hg19:17:46114539-46114561:-	SCN1B|6324	-0.658277	1.32e-13	8.28e-10	hsa-mir-152	ENSG00000105711	1	0	0	0	0	1	-0.413104
hg19:1:71533365-71533386:-	CDH3|1001	-0.658157	1.34e-13	8.36e-10	hsa-mir-186	ENSG00000062038	1	0	1	0	1	0	-0.17023
hg19:1:41220085-41220107:+	PTK2B|2185	-0.657742	1.4e-13	8.7e-10	hsa-mir-30e	ENSG00000120899	0	0	1	0	1	1	-0.394765
hg19:16:15737158-15737180:+	PKP2|5318	-0.65705	1.52e-13	9.3e-10	hsa-mir-484	ENSG00000057294	0	0	1	0	0	1	-0.397357
hg19:10:104196276-104196298:+	ZMAT4|79698	-0.656325	1.65e-13	9.95e-10	hsa-mir-146b	ENSG00000165061	1	0	0	0	1	0	-0.599332
hg19:1:41220043-41220063:+	MBOAT2|129642	-0.656195	1.67e-13	1.01e-09	hsa-mir-30e	ENSG00000143797	1	0	0	1	0	1	-0.490325
hg19:5:136983269-136983293:-	ST6GALNAC6|30815	-0.656155	1.68e-13	1.01e-09	hsa-mir-874	ENSG00000160408	1	0	0	0	0	1	-0.330867
hg19:9:97848344-97848366:-	QSOX1|5768	-0.655514	1.8e-13	1.07e-09	hsa-mir-3074	ENSG00000116260	1	0	0	1	0	1	-0.471351
hg19:1:205417492-205417512:-	ARL5A|26225	-0.654454	2.03e-13	1.18e-09	hsa-mir-135b	ENSG00000162980	1	0	0	0	0	1	-0.341792
hg19:17:19247828-19247848:-	C3|718	-0.654298	2.07e-13	1.2e-09	hsa-mir-1180	ENSG00000125730	1	0	0	0	0	1	-0.402552
hg19:17:1617208-1617229:-	C9orf3|84909	-0.654265	2.08e-13	1.21e-09	hsa-mir-22	ENSG00000148120	0	0	1	1	1	0	-0.488865
hg19:17:1617207-1617229:-	ANKS6|203286	-0.653911	2.16e-13	1.25e-09	hsa-mir-22	ENSG00000165138	0	0	1	1	0	1	-0.482218
hg19:8:22102486-22102509:-	MYO1D|4642	-0.653886	2.17e-13	1.25e-09	hsa-mir-320a	ENSG00000176658	1	0	0	0	1	0	-0.315945
hg19:17:46114539-46114561:-	MACC1|346389	-0.653713	2.21e-13	1.27e-09	hsa-mir-152	ENSG00000183742	1	0	0	0	0	1	-0.435588
hg19:1:41220043-41220063:+	RASGRF1|5923	-0.653622	2.23e-13	1.28e-09	hsa-mir-30e	ENSG00000058335	1	0	0	0	0	1	-0.412416
hg19:X:45606440-45606463:-	GTF2E1|2960	-0.653529	2.26e-13	1.29e-09	hsa-mir-222	ENSG00000153767	0	0	1	1	0	0	-0.49978
hg19:17:46114539-46114561:-	DPP4|1803	-0.65268	2.48e-13	1.39e-09	hsa-mir-152	ENSG00000197635	1	0	0	1	0	0	-0.369571
hg19:10:104196276-104196299:+	IPCEF1|26034	-0.652356	2.57e-13	1.44e-09	hsa-mir-146b	ENSG00000074706	0	0	1	1	0	0	-0.48411
hg19:6:72086705-72086729:-	CDK5RAP2|55755	-0.6523	2.59e-13	1.45e-09	hsa-mir-30c-2	ENSG00000136861	1	0	1	0	0	1	-0.24762
hg19:1:9211793-9211816:-	EPHB6|2051	-0.651763	2.75e-13	1.52e-09	hsa-mir-34a	ENSG00000260195	1	0	1	0	0	1	-0.478636
hg19:5:148808540-148808562:+	GRM4|2914	-0.651577	2.81e-13	1.55e-09	hsa-mir-143	ENSG00000124493	0	1	0	0	0	1	-0.166534
hg19:10:105154058-105154080:-	PRELP|5549	-0.6506	3.13e-13	1.69e-09	hsa-mir-1307	ENSG00000188783	1	0	0	1	0	0	-0.346259
hg19:6:72086705-72086729:-	PTPRE|5791	-0.6506	3.13e-13	1.69e-09	hsa-mir-30c-2	ENSG00000132334	1	0	0	1	1	0	-0.369371
hg19:17:19247827-19247848:-	PTPRO|5800	-0.650538	3.15e-13	1.7e-09	hsa-mir-1180	ENSG00000151490	1	0	1	0	0	1	-0.414613
hg19:17:1617208-1617227:-	CDK9|1025	-0.650402	3.2e-13	1.72e-09	hsa-mir-22	ENSG00000136807	1	0	0	0	0	1	-0.314891
hg19:6:72086705-72086729:-	GJB4|127534	-0.650092	3.31e-13	1.77e-09	hsa-mir-30c-2	ENSG00000189433	0	1	0	1	1	1	-0.280344
hg19:5:148441936-148441958:-	NOD1|10392	-0.650056	3.32e-13	1.77e-09	hsa-mir-584	ENSG00000106100	0	0	1	1	0	0	-0.29561
hg19:X:45605609-45605630:-	COX10|1352	-0.649041	3.71e-13	1.94e-09	hsa-mir-221	ENSG00000006695	1	0	0	1	0	1	-0.402607
hg19:10:105154057-105154080:-	SHF|90525	-0.648648	3.88e-13	2.02e-09	hsa-mir-1307	ENSG00000138606	0	0	1	0	0	1	-0.237175
hg19:6:72086705-72086729:-	CYP1B1|1545	-0.648417	3.98e-13	2.06e-09	hsa-mir-30c-2	ENSG00000138061	1	0	1	1	0	0	-0.329726
hg19:22:20020676-20020698:+	PTK7|5754	-0.647815	4.25e-13	2.17e-09	hsa-mir-185	ENSG00000112655	1	0	1	1	0	1	-0.478093
hg19:16:15737158-15737180:+	IDS|3423	-0.647681	4.31e-13	2.2e-09	hsa-mir-484	ENSG00000010404	1	0	0	1	0	0	-0.38479
hg19:17:46114539-46114561:-	MBOAT2|129642	-0.647473	4.41e-13	2.24e-09	hsa-mir-152	ENSG00000143797	1	0	0	1	0	0	-0.503774
hg19:10:105154057-105154080:-	SCARA3|51435	-0.647423	4.44e-13	2.25e-09	hsa-mir-1307	ENSG00000168077	1	0	0	0	0	1	-0.307457
hg19:10:104196277-104196297:+	KIAA1467|57613	-0.647422	4.44e-13	2.25e-09	hsa-mir-146b	ENSG00000084444	0	0	1	1	0	1	-0.475841
hg19:5:136983269-136983293:-	EPN2|22905	-0.647361	4.47e-13	2.26e-09	hsa-mir-874	ENSG00000072134	1	0	1	0	0	1	-0.330148
hg19:1:71533363-71533386:-	SERTAD2|9792	-0.647337	4.48e-13	2.26e-09	hsa-mir-186	ENSG00000179833	1	0	0	1	0	0	-0.0861464
hg19:5:136983270-136983293:-	EMP2|2013	-0.64726	4.52e-13	2.28e-09	hsa-mir-874	ENSG00000213853	1	1	0	1	0	0	-0.403059
hg19:17:57918634-57918656:+	BCO2|83875	-0.647258	4.52e-13	2.28e-09	hsa-mir-21	ENSG00000197580	1	0	0	0	0	1	-0.430964
hg19:5:136983270-136983293:-	PHF19|26147	-0.646444	4.94e-13	2.45e-09	hsa-mir-874	ENSG00000119403	1	1	1	0	0	1	-0.401003
hg19:5:136983269-136983293:-	SERTAD2|9792	-0.646232	5.06e-13	2.5e-09	hsa-mir-874	ENSG00000179833	1	0	0	1	0	0	-0.00932091
hg19:9:97848344-97848366:-	PKP2|5318	-0.645489	5.48e-13	2.67e-09	hsa-mir-3074	ENSG00000057294	1	1	1	1	0	1	-0.4232
hg19:14:100774213-100774235:+	SCARA3|51435	-0.645343	5.57e-13	2.7e-09	hsa-mir-345	ENSG00000168077	0	1	1	0	0	1	-0.505249
hg19:17:46114540-46114561:-	C1orf115|79762	-0.645026	5.76e-13	2.78e-09	hsa-mir-152	ENSG00000162817	1	0	0	0	1	0	-0.304645
hg19:1:41220043-41220066:+	INHBB|3625	-0.644335	6.21e-13	2.95e-09	hsa-mir-30e	ENSG00000163083	1	0	0	1	0	0	-0.376054
hg19:10:104196277-104196297:+	RAVER2|55225	-0.644268	6.26e-13	2.97e-09	hsa-mir-146b	ENSG00000162437	1	0	0	0	0	1	-0.593784
hg19:5:136983270-136983293:-	ADAMTS9|56999	-0.644156	6.34e-13	3e-09	hsa-mir-874	ENSG00000163638	0	0	1	0	0	1	-0.269783
hg19:17:1617208-1617229:-	DAB2IP|153090	-0.644036	6.42e-13	3.03e-09	hsa-mir-22	ENSG00000136848	0	0	1	1	0	1	-0.384405
hg19:7:25989540-25989564:-	KRT15|3866	-0.643876	6.53e-13	3.08e-09	hsa-mir-148a	ENSG00000171346	1	1	1	0	1	0	-0.380249
hg19:6:72086705-72086729:-	SERTAD2|9792	-0.643762	6.61e-13	3.11e-09	hsa-mir-30c-2	ENSG00000179833	1	0	0	1	0	0	-0.304963
hg19:X:133303880-133303903:-	C1orf116|79098	-0.64355	6.76e-13	3.17e-09	hsa-mir-20b	ENSG00000182795	1	0	0	1	0	0	-0.320859
hg19:9:97848344-97848366:-	SLC27A6|28965	-0.6432	7.03e-13	3.27e-09	hsa-mir-3074	ENSG00000113396	0	1	0	1	0	1	-0.461806
hg19:1:71533364-71533386:-	SPTBN2|6712	-0.642902	7.25e-13	3.36e-09	hsa-mir-186	ENSG00000173898	0	0	1	0	0	1	-0.29382
hg19:X:45606440-45606462:-	DCAF12|25853	-0.642824	7.32e-13	3.39e-09	hsa-mir-222	ENSG00000198876	0	1	0	1	0	0	-0.409496
hg19:1:71533365-71533386:-	TMC6|11322	-0.642364	7.69e-13	3.53e-09	hsa-mir-186	ENSG00000141524	1	0	0	0	1	1	-0.15341
hg19:8:22102486-22102509:-	GPHN|10243	-0.64208	7.93e-13	3.61e-09	hsa-mir-320a	ENSG00000171723	0	1	0	0	1	0	-0.174816
hg19:10:104196276-104196299:+	HK1|3098	-0.641864	8.11e-13	3.68e-09	hsa-mir-146b	ENSG00000156515	0	1	1	0	0	1	-0.565618
hg19:3:168269702-168269723:+	IPCEF1|26034	-0.641711	8.25e-13	3.73e-09	hsa-mir-551b	ENSG00000074706	1	1	0	1	0	0	-0.514513
hg19:5:148441937-148441958:-	RANBP3|8498	-0.641696	8.26e-13	3.73e-09	hsa-mir-584	ENSG00000031823	1	0	0	1	0	0	-0.345706
hg19:1:41220043-41220066:+	CDK5RAP2|55755	-0.64149	8.44e-13	3.8e-09	hsa-mir-30e	ENSG00000136861	1	0	1	0	0	1	-0.295938
hg19:1:41220043-41220066:+	TGFBR1|7046	-0.641168	8.74e-13	3.91e-09	hsa-mir-30e	ENSG00000106799	1	0	0	0	1	1	-0.241134
hg19:22:20020676-20020698:+	NRP2|8828	-0.641148	8.76e-13	3.91e-09	hsa-mir-185	ENSG00000118257	0	0	1	0	0	1	-0.30417
hg19:1:41220043-41220063:+	LASP1|3927	-0.640882	9.01e-13	4e-09	hsa-mir-30e	ENSG00000002834	0	0	1	0	1	0	-0.455602
hg19:9:97848344-97848366:-	SHROOM4|57477	-0.640702	9.19e-13	4.07e-09	hsa-mir-3074	ENSG00000158352	0	0	1	0	0	1	-0.387417
hg19:10:104196277-104196296:+	CLCNKA|1187	-0.640222	9.67e-13	4.24e-09	hsa-mir-146b	ENSG00000186510	0	0	1	1	0	0	-0.468638
hg19:10:104196276-104196298:+	PCMTD1|115294	-0.639754	1.02e-12	4.42e-09	hsa-mir-146b	ENSG00000168300	1	0	0	1	0	0	-0.494712
hg19:15:89151352-89151373:+	RUNX1|861	-0.639613	1.03e-12	4.48e-09	hsa-mir-1179	ENSG00000159216	0	1	0	1	0	1	-0.456346
hg19:11:57408725-57408747:+	ESYT1|23344	-0.639233	1.07e-12	4.63e-09	hsa-mir-130a	ENSG00000139641	0	0	1	1	0	1	-0.489214
hg19:12:54731062-54731084:+	TGFBR1|7046	-0.639109	1.09e-12	4.68e-09	hsa-mir-148b	ENSG00000106799	1	0	0	0	0	1	-0.340461
hg19:6:72113257-72113277:-	DMD|1756	-0.638615	1.15e-12	4.88e-09	hsa-mir-30a	ENSG00000198947	1	0	1	1	1	1	-0.335279
hg19:5:136983269-136983293:-	EPHA2|1969	-0.638518	1.16e-12	4.92e-09	hsa-mir-874	ENSG00000142627	1	0	0	0	0	1	-0.35484
hg19:17:46114539-46114561:-	KLK10|5655	-0.638404	1.17e-12	4.97e-09	hsa-mir-152	ENSG00000129451	1	0	0	1	0	0	-0.446585
hg19:22:20020676-20020698:+	EML3|256364	-0.638384	1.18e-12	4.98e-09	hsa-mir-185	ENSG00000149499	1	0	1	1	1	1	-0.38117
hg19:10:104196277-104196297:+	TIAM2|26230	-0.638065	1.22e-12	5.12e-09	hsa-mir-146b	ENSG00000146426	0	1	1	0	1	1	-0.414443
hg19:10:104196277-104196298:+	TMEM120B|144404	-0.637625	1.27e-12	5.32e-09	hsa-mir-146b	ENSG00000188735	1	0	0	1	0	0	-0.508809
hg19:17:1617207-1617229:-	LASP1|3927	-0.637405	1.3e-12	5.43e-09	hsa-mir-22	ENSG00000002834	1	0	0	0	0	1	-0.127247
hg19:8:22102486-22102509:-	ARL8B|55207	-0.637343	1.31e-12	5.45e-09	hsa-mir-320a	ENSG00000134108	0	0	1	1	0	0	-0.22161
hg19:17:19247826-19247848:-	HCK|3055	-0.637194	1.33e-12	5.52e-09	hsa-mir-1180	ENSG00000101336	1	0	1	1	0	1	-0.516732
hg19:9:73424947-73424969:-	KCNQ3|3786	-0.637007	1.36e-12	5.61e-09	hsa-mir-204	ENSG00000184156	0	0	1	0	1	1	-0.600043
hg19:16:15737158-15737181:+	FLII|2314	-0.636613	1.42e-12	5.81e-09	hsa-mir-484	ENSG00000177731	1	0	1	0	0	1	-0.4487
hg19:10:105154057-105154080:-	CLU|1191	-0.63657	1.42e-12	5.83e-09	hsa-mir-1307	ENSG00000120885	1	1	0	0	1	0	-0.376132
hg19:8:22102486-22102508:-	ATXN10|25814	-0.636306	1.46e-12	5.97e-09	hsa-mir-320a	ENSG00000130638	0	1	0	0	0	1	-0.323806
hg19:X:49767773-49767794:+	IL17RD|54756	-0.636149	1.49e-12	6.05e-09	hsa-mir-532	ENSG00000144730	0	1	0	1	0	0	-0.286291
hg19:12:54731062-54731084:+	MGAT3|4248	-0.636091	1.5e-12	6.08e-09	hsa-mir-148b	ENSG00000128268	1	0	0	1	0	1	-0.49686
hg19:5:136983271-136983293:-	PAPLN|89932	-0.636077	1.5e-12	6.08e-09	hsa-mir-874	ENSG00000100767	1	1	1	1	0	0	-0.412129
hg19:7:5535505-5535526:-	ECE1|1889	-0.635351	1.62e-12	6.46e-09	hsa-mir-589	ENSG00000117298	1	0	0	1	0	1	-0.37891
hg19:11:72326147-72326169:-	TCF3|6929	-0.635116	1.66e-12	6.59e-09	hsa-mir-139	ENSG00000071564	0	0	1	1	0	1	-0.416657
hg19:22:20020676-20020697:+	COL7A1|1294	-0.63504	1.67e-12	6.64e-09	hsa-mir-185	ENSG00000114270	0	0	1	0	0	1	-0.390303
hg19:14:100774213-100774232:+	PDLIM4|8572	-0.634349	1.8e-12	7.05e-09	hsa-mir-345	ENSG00000131435	1	0	0	1	0	0	-0.401439
hg19:1:41220043-41220066:+	SLC27A6|28965	-0.633994	1.87e-12	7.27e-09	hsa-mir-30e	ENSG00000113396	0	1	1	0	0	1	-0.372017
hg19:1:41220085-41220107:+	SPTAN1|6709	-0.633929	1.88e-12	7.31e-09	hsa-mir-30e	ENSG00000197694	0	0	1	0	0	1	-0.25831
hg19:11:57408725-57408745:+	MTHFD1|4522	-0.633618	1.94e-12	7.5e-09	hsa-mir-130a	ENSG00000100714	0	0	1	0	0	1	-0.401166
hg19:6:72086708-72086729:-	DBC1|1620	-0.633455	1.97e-12	7.61e-09	hsa-mir-30c-2	ENSG00000078725	0	0	1	0	1	0	-0.320156
hg19:5:136983271-136983293:-	B3GNT7|93010	-0.633275	2.01e-12	7.73e-09	hsa-mir-874	ENSG00000156966	1	0	1	1	0	0	-0.328976
hg19:10:104196277-104196297:+	TPO|7173	-0.633185	2.03e-12	7.79e-09	hsa-mir-146b	ENSG00000115705	1	0	1	0	0	1	-0.58933
hg19:X:45606443-45606463:-	KSR1|8844	-0.633181	2.03e-12	7.79e-09	hsa-mir-222	ENSG00000141068	1	0	1	0	0	1	-0.477782
hg19:1:41220044-41220066:+	CD97|976	-0.632887	2.09e-12	7.99e-09	hsa-mir-30e	ENSG00000123146	0	0	1	0	0	1	-0.45829
hg19:8:22102486-22102509:-	BHLHE40|8553	-0.632884	2.09e-12	7.99e-09	hsa-mir-320a	ENSG00000134107	0	1	0	1	0	1	-0.271976
hg19:1:71533362-71533386:-	CLCF1|23529	-0.632752	2.12e-12	8.08e-09	hsa-mir-186	ENSG00000175505	1	1	0	0	1	0	-0.234979
hg19:9:139565104-139565125:+	BCL9|607	-0.632579	2.16e-12	8.2e-09	hsa-mir-126	ENSG00000116128	1	0	0	0	0	1	-0.205302
hg19:5:136983269-136983293:-	FOXQ1|94234	-0.63195	2.31e-12	8.65e-09	hsa-mir-874	ENSG00000164379	0	1	1	0	0	1	-0.287119
hg19:1:41220085-41220107:+	PROS1|5627	-0.631654	2.38e-12	8.87e-09	hsa-mir-30e	ENSG00000184500	0	1	1	0	1	1	-0.355713
hg19:5:136983270-136983293:-	CDK9|1025	-0.631466	2.43e-12	9.01e-09	hsa-mir-874	ENSG00000136807	0	0	1	0	1	1	-0.321093
hg19:10:104196276-104196299:+	IGF2BP3|10643	-0.631456	2.43e-12	9.02e-09	hsa-mir-146b	ENSG00000136231	1	0	1	1	0	0	-0.576948
hg19:X:45605610-45605631:-	RANBP10|57610	-0.631305	2.47e-12	9.14e-09	hsa-mir-221	ENSG00000141084	1	0	0	1	0	1	-0.45762
hg19:5:136983269-136983293:-	BCL9|607	-0.631239	2.48e-12	9.19e-09	hsa-mir-874	ENSG00000116128	0	0	1	0	0	1	-0.266509
hg19:22:20020676-20020698:+	EPHB3|2049	-0.631173	2.5e-12	9.24e-09	hsa-mir-185	ENSG00000182580	0	0	1	1	1	1	-0.14147
hg19:6:72113257-72113277:-	CSNK1E|1454	-0.631169	2.5e-12	9.24e-09	hsa-mir-30a	ENSG00000213923	1	0	0	1	0	0	-0.529701
hg19:5:136983269-136983293:-	NOD1|10392	-0.631103	2.52e-12	9.29e-09	hsa-mir-874	ENSG00000106100	1	0	1	0	1	1	-0.3665
hg19:5:136983269-136983293:-	CDH3|1001	-0.630453	2.69e-12	9.83e-09	hsa-mir-874	ENSG00000062038	0	0	1	0	0	1	-0.460362
hg19:17:57918634-57918652:+	TUBB1|81027	-0.630177	2.77e-12	1.01e-08	hsa-mir-21	ENSG00000101162	0	0	1	1	0	0	-0.61903
hg19:12:54731062-54731084:+	PDE5A|8654	-0.630167	2.77e-12	1.01e-08	hsa-mir-148b	ENSG00000138735	1	0	0	1	0	1	-0.356206
hg19:10:104196277-104196301:+	CYB5D1|124637	-0.629971	2.83e-12	1.02e-08	hsa-mir-146b	ENSG00000182224	1	0	0	1	0	0	-0.407524
hg19:3:188406624-188406645:+	ZMYM3|9203	-0.629742	2.9e-12	1.04e-08	hsa-mir-28	ENSG00000147130	0	0	1	0	1	1	-0.146667
hg19:10:104196277-104196297:+	BAP1|8314	-0.629364	3.01e-12	1.08e-08	hsa-mir-146b	ENSG00000163930	1	0	1	0	0	1	-0.311898
hg19:9:97848344-97848366:-	ESPN|83715	-0.629335	3.02e-12	1.08e-08	hsa-mir-3074	ENSG00000187017	1	0	0	0	0	1	-0.443712
hg19:1:41220043-41220063:+	NRP2|8828	-0.629157	3.08e-12	1.1e-08	hsa-mir-30e	ENSG00000118257	0	0	1	1	0	1	-0.458879
hg19:5:136983271-136983293:-	PTK2B|2185	-0.629146	3.08e-12	1.1e-08	hsa-mir-874	ENSG00000120899	1	1	0	0	0	1	-0.253392
hg19:5:136983269-136983293:-	IKZF2|22807	-0.628629	3.25e-12	1.15e-08	hsa-mir-874	ENSG00000030419	1	0	0	0	0	1	-0.292789
hg19:X:49767810-49767831:+	TRIM14|9830	-0.628596	3.26e-12	1.15e-08	hsa-mir-532	ENSG00000106785	1	0	0	1	0	1	-0.306166
hg19:X:49777864-49777886:+	EPHB3|2049	-0.628497	3.29e-12	1.16e-08	hsa-mir-660	ENSG00000182580	0	0	1	0	0	1	-0.2226
hg19:X:49777864-49777886:+	FYN|2534	-0.628374	3.33e-12	1.17e-08	hsa-mir-660	ENSG00000010810	0	1	0	0	1	1	-0.284832
hg19:9:21512118-21512139:-	BAP1|8314	-0.628334	3.35e-12	1.18e-08	hsa-mir-31	ENSG00000163930	0	0	1	1	0	0	-0.463057
hg19:9:97848344-97848366:-	NAT8L|339983	-0.628166	3.41e-12	1.19e-08	hsa-mir-3074	ENSG00000185818	1	0	0	1	0	0	-0.283746
hg19:17:57918634-57918652:+	KCNQ1|3784	-0.628099	3.43e-12	1.2e-08	hsa-mir-21	ENSG00000053918	0	0	1	0	0	1	-0.580731
hg19:3:188406624-188406645:+	ECE1|1889	-0.628042	3.45e-12	1.2e-08	hsa-mir-28	ENSG00000117298	0	0	1	1	0	1	-0.269451
hg19:10:104196277-104196297:+	C19orf54|284325	-0.627341	3.7e-12	1.28e-08	hsa-mir-146b	ENSG00000188493	1	0	0	0	0	1	-0.427809
hg19:1:41220044-41220069:+	CLCF1|23529	-0.627285	3.73e-12	1.28e-08	hsa-mir-30e	ENSG00000175505	1	0	0	1	0	0	-0.290122
hg19:19:13947261-13947282:-	ANKRD20A3|441425	-0.62705	3.82e-12	1.31e-08	hsa-mir-27a	ENSG00000132498	0	0	1	0	0	1	-0.231189
hg19:10:104196277-104196296:+	LGI3|203190	-0.626992	3.84e-12	1.31e-08	hsa-mir-146b	ENSG00000168481	1	0	0	1	0	0	-0.563884
hg19:9:97848344-97848366:-	TMC8|147138	-0.626867	3.89e-12	1.33e-08	hsa-mir-3074	ENSG00000167895	1	0	1	1	0	1	-0.315395
hg19:12:54731062-54731084:+	SERPINA1|5265	-0.62653	4.02e-12	1.36e-08	hsa-mir-148b	ENSG00000197249	1	0	0	1	1	0	-0.446129
hg19:5:136983270-136983293:-	NFKB2|4791	-0.626456	4.05e-12	1.37e-08	hsa-mir-874	ENSG00000077150	0	1	1	0	0	1	-0.411066
hg19:3:188406622-188406643:+	RBMS2|5939	-0.625982	4.25e-12	1.43e-08	hsa-mir-28	ENSG00000076067	1	0	0	1	0	0	-0.299326
hg19:8:22102487-22102508:-	PEX26|55670	-0.625841	4.31e-12	1.44e-08	hsa-mir-320a	ENSG00000215193	1	0	0	0	1	1	-0.150045
hg19:17:1617207-1617230:-	AHNAK2|113146	-0.625708	4.37e-12	1.46e-08	hsa-mir-22	ENSG00000185567	0	0	1	1	0	1	0.0322891
hg19:X:49773090-49773113:+	DLG4|1742	-0.625652	4.4e-12	1.47e-08	hsa-mir-500a	ENSG00000132535	0	0	1	0	1	0	-0.230066
hg19:12:54731062-54731084:+	DSC3|1825	-0.625622	4.41e-12	1.47e-08	hsa-mir-148b	ENSG00000134762	1	0	1	0	0	1	-0.476854
hg19:5:136983269-136983293:-	CATSPER1|117144	-0.62556	4.44e-12	1.48e-08	hsa-mir-874	ENSG00000175294	1	0	0	0	0	1	-0.44049
hg19:17:46114540-46114561:-	SHC1|6464	-0.6251	4.65e-12	1.54e-08	hsa-mir-152	ENSG00000160691	0	0	1	0	0	1	-0.262597
hg19:X:49773090-49773112:+	PCNXL2|80003	-0.625084	4.66e-12	1.54e-08	hsa-mir-500a	ENSG00000135749	1	1	0	0	1	1	-0.300166
hg19:17:46114539-46114561:-	INHBB|3625	-0.624949	4.72e-12	1.55e-08	hsa-mir-152	ENSG00000163083	1	0	0	1	0	0	-0.492404
hg19:11:57408725-57408746:+	NDRG3|57446	-0.624832	4.78e-12	1.57e-08	hsa-mir-130a	ENSG00000101079	1	0	1	0	0	1	-0.207006
hg19:12:7072904-7072925:+	CREB5|9586	-0.624828	4.78e-12	1.57e-08	hsa-mir-200c	ENSG00000146592	0	0	1	1	0	0	-0.364408
hg19:9:97848344-97848366:-	KCNN4|3783	-0.624758	4.81e-12	1.58e-08	hsa-mir-3074	ENSG00000104783	0	0	1	0	1	1	-0.471303
hg19:17:1617207-1617229:-	KRT15|3866	-0.624589	4.9e-12	1.6e-08	hsa-mir-22	ENSG00000171346	1	0	0	0	1	1	-0.102842
hg19:5:136983269-136983293:-	CLU|1191	-0.624538	4.92e-12	1.61e-08	hsa-mir-874	ENSG00000120885	0	1	0	0	1	0	-0.433392
hg19:5:136983271-136983292:-	CD97|976	-0.624379	5e-12	1.63e-08	hsa-mir-874	ENSG00000123146	1	0	1	0	0	1	-0.509719
hg19:X:49773576-49773599:+	PTK7|5754	-0.624119	5.13e-12	1.67e-08	hsa-mir-362	ENSG00000112655	1	0	0	1	0	1	-0.514936
hg19:22:20020676-20020698:+	DNAJB5|25822	-0.624055	5.17e-12	1.68e-08	hsa-mir-185	ENSG00000137094	1	1	1	1	1	1	-0.133478
hg19:7:25989540-25989564:-	PPL|5493	-0.624015	5.19e-12	1.68e-08	hsa-mir-148a	ENSG00000118898	0	0	1	0	0	1	-0.253384
hg19:17:19247826-19247848:-	SPN|6693	-0.623935	5.23e-12	1.69e-08	hsa-mir-1180	ENSG00000197471	1	0	1	1	0	0	-0.561488
hg19:5:136983270-136983293:-	TGFB3|7043	-0.623908	5.24e-12	1.7e-08	hsa-mir-874	ENSG00000119699	0	1	0	1	0	0	-0.335211
hg19:6:72086706-72086729:-	DSC3|1825	-0.623841	5.28e-12	1.71e-08	hsa-mir-30c-2	ENSG00000134762	1	0	1	1	0	1	-0.396669
hg19:11:121970518-121970539:-	ADD2|119	-0.623566	5.43e-12	1.75e-08	hsa-mir-125b-1	ENSG00000075340	0	1	0	0	1	0	-0.196878
hg19:5:136983269-136983293:-	RAB34|83871	-0.623564	5.43e-12	1.75e-08	hsa-mir-874	ENSG00000109113	0	1	0	0	1	0	-0.324072
hg19:10:104196277-104196297:+	MYT1|4661	-0.623228	5.61e-12	1.79e-08	hsa-mir-146b	ENSG00000196132	0	1	1	1	0	1	-0.260589
hg19:10:104196277-104196301:+	SHANK2|22941	-0.623181	5.64e-12	1.8e-08	hsa-mir-146b	ENSG00000162105	1	0	1	0	0	1	-0.547238
hg19:17:46114539-46114561:-	CHST2|9435	-0.623168	5.65e-12	1.8e-08	hsa-mir-152	ENSG00000175040	1	0	0	0	0	1	-0.537682
hg19:6:72086707-72086729:-	CCR1|1230	-0.622925	5.79e-12	1.84e-08	hsa-mir-30c-2	ENSG00000163823	0	0	1	1	0	0	-0.425476
hg19:9:97848344-97848366:-	RAD23B|5887	-0.622853	5.83e-12	1.85e-08	hsa-mir-3074	ENSG00000119318	0	1	0	1	0	1	-0.415564
hg19:7:25989540-25989564:-	BMP1|649	-0.622648	5.95e-12	1.88e-08	hsa-mir-148a	ENSG00000168487	1	0	1	1	0	1	-0.30394
hg19:6:72086705-72086729:-	INPP4A|3631	-0.622078	6.3e-12	1.97e-08	hsa-mir-30c-2	ENSG00000040933	1	0	0	0	0	1	-0.230119
hg19:X:45605610-45605630:-	KIAA1467|57613	-0.622027	6.33e-12	1.98e-08	hsa-mir-221	ENSG00000084444	1	0	1	0	0	1	-0.438634
hg19:17:57918634-57918655:+	SLC4A4|8671	-0.621933	6.39e-12	1.99e-08	hsa-mir-21	ENSG00000080493	0	0	1	1	0	0	-0.561743
hg19:5:136983270-136983293:-	TMEM44|93109	-0.621806	6.47e-12	2.01e-08	hsa-mir-874	ENSG00000145014	1	0	1	1	0	0	-0.260799
hg19:10:104196276-104196298:+	L3MBTL4|91133	-0.62178	6.49e-12	2.02e-08	hsa-mir-146b	ENSG00000154655	0	0	1	0	0	1	-0.536117
hg19:6:72086708-72086729:-	HAVCR2|84868	-0.621773	6.5e-12	2.02e-08	hsa-mir-30c-2	ENSG00000135077	0	1	0	1	0	0	-0.458175
hg19:17:19247827-19247848:-	CIITA|4261	-0.621682	6.55e-12	2.03e-08	hsa-mir-1180	ENSG00000179583	1	0	0	1	0	0	-0.499048
hg19:12:54731062-54731084:+	QSOX1|5768	-0.620964	7.04e-12	2.16e-08	hsa-mir-148b	ENSG00000116260	0	0	1	1	0	1	-0.471639
hg19:5:136983270-136983293:-	MTA2|9219	-0.620804	7.15e-12	2.19e-08	hsa-mir-874	ENSG00000149480	0	0	1	1	0	0	-0.486515
hg19:10:104196314-104196333:+	OGDHL|55753	-0.620631	7.28e-12	2.22e-08	hsa-mir-146b	ENSG00000197444	1	0	1	0	0	1	-0.417771
hg19:17:1617207-1617229:-	IGF2BP2|10644	-0.620503	7.37e-12	2.24e-08	hsa-mir-22	ENSG00000073792	0	0	1	1	0	1	-0.363961
hg19:17:46114539-46114561:-	RAMP1|10267	-0.620342	7.49e-12	2.27e-08	hsa-mir-152	ENSG00000132329	1	0	0	0	0	1	-0.460393
hg19:5:136983269-136983293:-	PCNXL2|80003	-0.620243	7.56e-12	2.29e-08	hsa-mir-874	ENSG00000135749	1	1	1	0	1	1	-0.430479
hg19:9:139565104-139565125:+	DAB2IP|153090	-0.620074	7.69e-12	2.32e-08	hsa-mir-126	ENSG00000136848	1	0	0	1	0	0	-0.192814
hg19:10:104196276-104196298:+	C14orf64|388011	-0.61996	7.78e-12	2.34e-08	hsa-mir-146b	ENSG00000246223	1	0	0	0	0	1	-0.389746
hg19:5:136983270-136983293:-	FXYD5|53827	-0.619913	7.82e-12	2.35e-08	hsa-mir-874	ENSG00000089327	0	1	0	0	1	0	-0.480054
hg19:22:20020676-20020697:+	PLAU|5328	-0.619691	7.99e-12	2.39e-08	hsa-mir-185	ENSG00000122861	0	1	1	0	1	1	-0.145328
hg19:17:46114540-46114561:-	KRT15|3866	-0.619587	8.07e-12	2.41e-08	hsa-mir-152	ENSG00000171346	1	0	0	0	1	0	-0.539274
hg19:2:241395432-241395452:+	MPP1|4354	-0.619583	8.08e-12	2.41e-08	hsa-mir-149	ENSG00000130830	1	0	1	0	1	1	-0.414423
hg19:1:41220043-41220064:+	ICAM1|3383	-0.619563	8.09e-12	2.42e-08	hsa-mir-30e	ENSG00000090339	1	0	0	1	0	0	-0.392183
hg19:X:45605611-45605631:-	PRPSAP1|5635	-0.619435	8.2e-12	2.44e-08	hsa-mir-221	ENSG00000161542	0	1	0	0	0	1	-0.427653
hg19:1:41220085-41220107:+	RAD23B|5887	-0.619384	8.24e-12	2.45e-08	hsa-mir-30e	ENSG00000119318	0	1	0	1	1	1	-0.300517
hg19:22:20020676-20020698:+	CLCF1|23529	-0.618971	8.58e-12	2.53e-08	hsa-mir-185	ENSG00000175505	0	0	1	1	1	0	-0.273117
hg19:19:50004091-50004113:-	RAPGEFL1|51195	-0.61885	8.68e-12	2.56e-08	hsa-mir-150	ENSG00000108352	0	0	1	0	0	1	-0.443824
hg19:1:41220044-41220064:+	IL17RD|54756	-0.618672	8.84e-12	2.6e-08	hsa-mir-30e	ENSG00000144730	1	0	0	1	0	0	-0.419119
hg19:10:104196276-104196299:+	SLC27A4|10999	-0.618586	8.91e-12	2.61e-08	hsa-mir-146b	ENSG00000167114	0	0	1	0	0	1	-0.599911
hg19:10:104196314-104196333:+	SLC5A8|160728	-0.618546	8.95e-12	2.62e-08	hsa-mir-146b	ENSG00000262217	1	0	0	0	1	0	-0.537731
hg19:10:104196277-104196297:+	AKT2|208	-0.618534	8.96e-12	2.63e-08	hsa-mir-146b	ENSG00000105221	0	1	1	0	0	1	-0.384309
hg19:1:41220044-41220065:+	DUSP4|1846	-0.618439	9.04e-12	2.64e-08	hsa-mir-30e	ENSG00000120875	0	1	0	1	0	0	-0.331959
hg19:1:41220044-41220065:+	TIPARP|25976	-0.618346	9.13e-12	2.66e-08	hsa-mir-30e	ENSG00000163659	0	0	1	1	1	0	-0.253577
hg19:17:57918634-57918652:+	STRC|161497	-0.618322	9.15e-12	2.67e-08	hsa-mir-21	ENSG00000242866	1	0	1	0	0	1	-0.39199
hg19:8:22102488-22102510:-	TMCC3|57458	-0.618108	9.34e-12	2.72e-08	hsa-mir-320a	ENSG00000057704	1	0	0	1	0	0	-0.249116
hg19:17:57918634-57918655:+	RFX4|5992	-0.617969	9.47e-12	2.75e-08	hsa-mir-21	ENSG00000111783	0	0	1	1	0	0	-0.510426
hg19:10:104196314-104196333:+	PHKB|5257	-0.617939	9.5e-12	2.75e-08	hsa-mir-146b	ENSG00000102893	1	0	1	1	0	1	-0.738037
hg19:X:45605609-45605630:-	KIT|3815	-0.617937	9.5e-12	2.75e-08	hsa-mir-221	ENSG00000157404	0	0	1	1	0	1	-0.507843
hg19:2:241395432-241395452:+	WWC1|23286	-0.617926	9.51e-12	2.76e-08	hsa-mir-149	ENSG00000113645	1	0	1	1	0	1	-0.218299
hg19:17:1617209-1617230:-	PTPRE|5791	-0.617777	9.65e-12	2.79e-08	hsa-mir-22	ENSG00000132334	1	0	0	0	1	0	-0.253717
hg19:10:104196277-104196297:+	ONECUT2|9480	-0.617765	9.66e-12	2.79e-08	hsa-mir-146b	ENSG00000119547	1	0	0	1	0	0	-0.530063
hg19:X:45605609-45605631:-	C16orf71|146562	-0.61767	9.76e-12	2.81e-08	hsa-mir-221	ENSG00000166246	0	0	1	1	0	0	-0.428729
hg19:8:22102486-22102509:-	ATP11C|286410	-0.617658	9.77e-12	2.81e-08	hsa-mir-320a	ENSG00000101974	0	1	0	0	0	1	-0.215849
hg19:X:45605651-45605671:-	SCARB1|949	-0.617646	9.78e-12	2.82e-08	hsa-mir-221	ENSG00000073060	1	0	0	1	1	0	-0.180118
hg19:12:7073276-7073296:+	HAVCR2|84868	-0.617588	9.83e-12	2.83e-08	hsa-mir-141	ENSG00000135077	0	0	1	1	1	1	-0.180873
hg19:17:46114539-46114561:-	PDE5A|8654	-0.617516	9.9e-12	2.85e-08	hsa-mir-152	ENSG00000138735	0	0	1	1	0	0	-0.494366
hg19:17:57918634-57918652:+	NRSN2|80023	-0.617351	1.01e-11	2.88e-08	hsa-mir-21	ENSG00000125841	0	0	1	0	0	1	-0.40599
hg19:5:136983272-136983293:-	DLEC1|9940	-0.617299	1.01e-11	2.89e-08	hsa-mir-874	ENSG00000008226	1	0	1	0	0	1	-0.231873
hg19:17:1617208-1617229:-	PSPC1|55269	-0.616862	1.06e-11	3e-08	hsa-mir-22	ENSG00000121390	1	0	0	0	0	1	-0.319291
hg19:9:97847787-97847807:+	NCAM1|4684	-0.616862	1.06e-11	3e-08	hsa-mir-27b	ENSG00000262279	1	0	1	0	1	1	-0.277483
hg19:17:1617207-1617229:-	EML3|256364	-0.616798	1.06e-11	3.01e-08	hsa-mir-22	ENSG00000149499	1	0	1	0	0	1	-0.391563
hg19:8:22102488-22102509:-	GRSF1|2926	-0.616786	1.06e-11	3.02e-08	hsa-mir-320a	ENSG00000132463	0	0	1	0	0	1	-0.205356
hg19:1:207975249-207975270:-	NRP2|8828	-0.616747	1.07e-11	3.03e-08	hsa-mir-29c	ENSG00000118257	0	0	1	0	0	1	-0.293824
hg19:6:72086706-72086729:-	FN1|2335	-0.616655	1.08e-11	3.05e-08	hsa-mir-30c-2	ENSG00000115414	1	0	1	0	0	1	-0.562688
hg19:19:13985539-13985560:+	SLC5A7|60482	-0.616628	1.08e-11	3.06e-08	hsa-mir-181c	ENSG00000115665	1	0	1	1	0	0	-0.171551
hg19:5:136983270-136983293:-	KRT15|3866	-0.616621	1.08e-11	3.06e-08	hsa-mir-874	ENSG00000171346	1	1	1	0	1	0	-0.470081
hg19:9:21512119-21512142:-	MPPED2|744	-0.616517	1.09e-11	3.08e-08	hsa-mir-31	ENSG00000066382	0	0	1	0	1	0	-0.326165
hg19:14:100774213-100774232:+	MAP2|4133	-0.616238	1.12e-11	3.15e-08	hsa-mir-345	ENSG00000078018	0	0	1	0	0	1	-0.331435
hg19:5:148441937-148441958:-	TCF3|6929	-0.615883	1.16e-11	3.24e-08	hsa-mir-584	ENSG00000071564	1	0	1	1	0	0	-0.332943
hg19:10:104196277-104196301:+	ZNF346|23567	-0.615877	1.16e-11	3.25e-08	hsa-mir-146b	ENSG00000113761	1	0	0	1	0	0	-0.387998
hg19:X:45605610-45605631:-	SLC39A9|55334	-0.615597	1.2e-11	3.32e-08	hsa-mir-221	ENSG00000029364	1	0	0	1	0	0	-0.476229
hg19:1:41220043-41220063:+	RUNX1|861	-0.615458	1.21e-11	3.35e-08	hsa-mir-30e	ENSG00000159216	1	0	0	1	0	0	-0.494037
hg19:X:45606440-45606463:-	BBS4|585	-0.615384	1.22e-11	3.38e-08	hsa-mir-222	ENSG00000140463	1	0	1	1	1	1	-0.368962
hg19:3:188406622-188406644:+	TANK|10010	-0.615337	1.23e-11	3.39e-08	hsa-mir-28	ENSG00000136560	0	0	1	1	0	0	-0.284688
hg19:X:45606441-45606463:-	SLC4A4|8671	-0.615098	1.26e-11	3.45e-08	hsa-mir-222	ENSG00000080493	1	0	1	1	0	1	-0.563595
hg19:7:25989540-25989564:-	INHBB|3625	-0.614516	1.33e-11	3.62e-08	hsa-mir-148a	ENSG00000163083	1	0	0	1	0	0	-0.336189
hg19:15:89151352-89151373:+	ANXA2|302	-0.614481	1.33e-11	3.63e-08	hsa-mir-1179	ENSG00000182718	1	0	1	0	1	0	-0.365198
hg19:10:104196277-104196296:+	COPZ1|22818	-0.614393	1.34e-11	3.65e-08	hsa-mir-146b	ENSG00000111481	1	0	1	1	0	0	-0.363758
hg19:X:45606440-45606463:-	PEG3|5178	-0.614339	1.35e-11	3.67e-08	hsa-mir-222	ENSG00000198300	1	0	1	1	0	1	-0.384839
hg19:10:104196277-104196301:+	AACS|65985	-0.614182	1.37e-11	3.71e-08	hsa-mir-146b	ENSG00000081760	0	1	0	0	1	1	-0.524941
hg19:16:69967045-69967065:+	RAPGEFL1|51195	-0.6141	1.38e-11	3.74e-08	hsa-mir-140	ENSG00000108352	1	0	0	0	1	0	-0.422223
hg19:5:148441936-148441958:-	XKRX|402415	-0.614051	1.39e-11	3.75e-08	hsa-mir-584	ENSG00000182489	1	0	0	0	1	0	-0.17717
hg19:1:41220043-41220066:+	RNASE4|6038	-0.614019	1.39e-11	3.76e-08	hsa-mir-30e	ENSG00000258818	1	0	0	0	1	0	-0.308238
hg19:14:100774213-100774233:+	QSOX1|5768	-0.614001	1.4e-11	3.77e-08	hsa-mir-345	ENSG00000116260	1	0	0	1	0	0	-0.371494
hg19:14:100774213-100774235:+	INHBB|3625	-0.613816	1.42e-11	3.82e-08	hsa-mir-345	ENSG00000163083	1	0	0	1	0	0	-0.309017
hg19:5:136983273-136983293:-	LYPLA2|11313	-0.613584	1.45e-11	3.89e-08	hsa-mir-874	ENSG00000011009	1	0	0	0	0	1	-0.214646
hg19:5:136983270-136983293:-	C19orf66|55337	-0.613432	1.48e-11	3.94e-08	hsa-mir-874	ENSG00000130813	1	1	1	1	0	0	-0.293158
hg19:9:97848344-97848366:-	MBOAT2|129642	-0.613422	1.48e-11	3.94e-08	hsa-mir-3074	ENSG00000143797	1	0	0	1	0	0	-0.445101
hg19:X:45605612-45605631:-	PPM1H|57460	-0.613393	1.48e-11	3.95e-08	hsa-mir-221	ENSG00000111110	1	0	0	1	0	0	-0.360133
hg19:X:45605609-45605631:-	PEG3|5178	-0.613267	1.5e-11	3.99e-08	hsa-mir-221	ENSG00000198300	1	0	0	1	0	1	-0.40976
hg19:22:20020676-20020698:+	MAMLD1|10046	-0.613189	1.51e-11	4.02e-08	hsa-mir-185	ENSG00000013619	0	0	1	1	0	1	-0.163948
hg19:1:41220044-41220064:+	ACTN1|87	-0.613174	1.51e-11	4.02e-08	hsa-mir-30e	ENSG00000072110	1	0	1	1	0	0	-0.36325
hg19:12:7072905-7072924:+	CSF1R|1436	-0.613173	1.51e-11	4.02e-08	hsa-mir-200c	ENSG00000182578	1	0	0	0	0	1	-0.443726
hg19:1:71533364-71533386:-	PTPRE|5791	-0.613038	1.53e-11	4.06e-08	hsa-mir-186	ENSG00000132334	1	0	0	1	1	0	-0.243125
hg19:X:49773090-49773112:+	SCN5A|6331	-0.612975	1.54e-11	4.08e-08	hsa-mir-500a	ENSG00000183873	1	0	1	1	0	1	-0.231797
hg19:17:79099726-79099747:+	UBASH3B|84959	-0.612888	1.56e-11	4.11e-08	hsa-mir-3065	ENSG00000154127	0	0	1	1	0	0	-0.206341
hg19:22:20020676-20020698:+	MDK|4192	-0.612886	1.56e-11	4.11e-08	hsa-mir-185	ENSG00000110492	0	0	1	1	0	0	-0.414186
hg19:19:50004091-50004113:-	GNB3|2784	-0.612863	1.56e-11	4.12e-08	hsa-mir-150	ENSG00000111664	0	1	0	1	0	0	-0.218802
hg19:7:25989540-25989564:-	DHRS3|9249	-0.612834	1.56e-11	4.13e-08	hsa-mir-148a	ENSG00000162496	0	1	0	0	1	1	-0.403786
hg19:5:159912379-159912400:+	IQCC|55721	-0.61283	1.56e-11	4.13e-08	hsa-mir-146a	ENSG00000160051	0	0	1	0	0	1	-0.487912
hg19:5:136983270-136983292:-	DAB2IP|153090	-0.612822	1.57e-11	4.14e-08	hsa-mir-874	ENSG00000136848	1	0	1	1	0	1	-0.326163
hg19:5:136983270-136983293:-	SCN2B|6327	-0.612801	1.57e-11	4.14e-08	hsa-mir-874	ENSG00000149575	1	0	0	1	0	1	-0.246108
hg19:X:49773576-49773599:+	NUMBL|9253	-0.612728	1.58e-11	4.17e-08	hsa-mir-362	ENSG00000105245	1	0	0	0	0	1	-0.159509
hg19:5:136983271-136983293:-	IL13RA1|3597	-0.612688	1.59e-11	4.18e-08	hsa-mir-874	ENSG00000131724	1	0	0	0	0	1	-0.36619
hg19:10:104196277-104196297:+	OGDH|4967	-0.61261	1.6e-11	4.2e-08	hsa-mir-146b	ENSG00000105953	0	0	1	0	0	1	-0.586343
hg19:22:20020676-20020698:+	CLU|1191	-0.612493	1.62e-11	4.24e-08	hsa-mir-185	ENSG00000120885	0	1	1	1	1	1	-0.402292
hg19:1:71533364-71533386:-	MACC1|346389	-0.612463	1.62e-11	4.25e-08	hsa-mir-186	ENSG00000183742	1	0	0	0	1	1	-0.251832
hg19:1:41220043-41220063:+	CDC25B|994	-0.612422	1.63e-11	4.27e-08	hsa-mir-30e	ENSG00000101224	1	1	0	0	1	0	-0.335992
hg19:X:45605610-45605630:-	SLC4A4|8671	-0.612411	1.63e-11	4.27e-08	hsa-mir-221	ENSG00000080493	1	0	0	1	0	1	-0.460698
hg19:16:69967045-69967065:+	LRRC37A3|374819	-0.612344	1.64e-11	4.29e-08	hsa-mir-140	ENSG00000176809	1	1	0	0	1	1	-0.286261
hg19:1:71533365-71533386:-	MLLT11|10962	-0.612294	1.65e-11	4.31e-08	hsa-mir-186	ENSG00000213190	0	1	0	1	1	0	-0.321001
hg19:3:188406623-188406645:+	IKZF2|22807	-0.612245	1.66e-11	4.33e-08	hsa-mir-28	ENSG00000030419	1	0	0	0	0	1	-0.352152
hg19:5:136983271-136983293:-	FMNL2|114793	-0.612193	1.66e-11	4.34e-08	hsa-mir-874	ENSG00000157827	1	0	0	1	0	0	-0.261901
hg19:14:100774213-100774232:+	SYN1|6853	-0.612112	1.68e-11	4.37e-08	hsa-mir-345	ENSG00000008056	0	0	1	0	0	1	-0.37991
hg19:6:72113257-72113276:-	CLCF1|23529	-0.611913	1.71e-11	4.44e-08	hsa-mir-30a	ENSG00000175505	1	0	0	1	0	0	-0.335903
hg19:17:46114540-46114561:-	GOLT1A|127845	-0.611902	1.71e-11	4.44e-08	hsa-mir-152	ENSG00000174567	1	0	0	1	0	0	-0.451613
hg19:10:104196277-104196295:+	SLC4A4|8671	-0.611873	1.72e-11	4.45e-08	hsa-mir-146b	ENSG00000080493	1	0	0	0	0	1	-0.537958
hg19:8:22102488-22102510:-	MARCH5|54708	-0.611861	1.72e-11	4.46e-08	hsa-mir-320a	ENSG00000198060	0	1	0	1	0	0	-0.301393
hg19:X:109298617-109298638:+	RYR1|6261	-0.611812	1.73e-11	4.47e-08	hsa-mir-652	ENSG00000196218	1	0	1	0	0	1	-0.469683
hg19:X:49777864-49777886:+	PAPLN|89932	-0.611763	1.73e-11	4.49e-08	hsa-mir-660	ENSG00000100767	1	0	0	0	0	1	-0.264736
hg19:10:104196277-104196297:+	C16orf71|146562	-0.611645	1.75e-11	4.53e-08	hsa-mir-146b	ENSG00000166246	0	0	1	0	0	1	-0.445409
hg19:X:49774380-49774403:+	SHF|90525	-0.611503	1.78e-11	4.58e-08	hsa-mir-501	ENSG00000138606	0	1	0	1	1	0	-0.382923
hg19:22:20020676-20020698:+	SDK1|221935	-0.611321	1.81e-11	4.65e-08	hsa-mir-185	ENSG00000146555	1	0	1	0	0	1	-0.450058
hg19:11:72326147-72326169:-	CRTC1|23373	-0.611307	1.81e-11	4.66e-08	hsa-mir-139	ENSG00000105662	1	0	1	1	0	1	0.0426692
hg19:X:49767773-49767794:+	AMIGO2|347902	-0.611202	1.83e-11	4.69e-08	hsa-mir-532	ENSG00000139211	0	0	1	0	1	0	-0.408844
hg19:19:50004091-50004113:-	ZNF551|90233	-0.610884	1.89e-11	4.81e-08	hsa-mir-150	ENSG00000204519	0	0	1	1	0	0	-0.304198
hg19:10:104196277-104196297:+	GPR155|151556	-0.610859	1.89e-11	4.82e-08	hsa-mir-146b	ENSG00000163328	1	0	1	0	1	0	-0.525644
hg19:5:136983271-136983293:-	CD276|80381	-0.610752	1.91e-11	4.86e-08	hsa-mir-874	ENSG00000103855	1	0	1	1	1	1	-0.506306
hg19:7:5535505-5535526:-	SHROOM3|57619	-0.610676	1.93e-11	4.89e-08	hsa-mir-589	ENSG00000138771	1	0	0	1	0	0	-0.212585
hg19:19:50004089-50004111:-	PRSS45|377047	-0.610589	1.94e-11	4.92e-08	hsa-mir-150	ENSG00000188086	0	1	0	0	1	0	-0.306632
hg19:8:22102486-22102509:-	VDAC1|7416	-0.610515	1.96e-11	4.95e-08	hsa-mir-320a	ENSG00000213585	0	1	0	1	0	0	-0.119557
hg19:X:45605611-45605631:-	RNF157|114804	-0.610505	1.96e-11	4.96e-08	hsa-mir-221	ENSG00000141576	1	0	0	1	0	0	-0.529493
hg19:X:45606440-45606463:-	PITPNM2|57605	-0.610505	1.96e-11	4.96e-08	hsa-mir-222	ENSG00000090975	0	0	1	1	0	0	-0.270208
hg19:10:104196276-104196299:+	ACACB|32	-0.610463	1.97e-11	4.97e-08	hsa-mir-146b	ENSG00000076555	1	0	1	0	0	1	-0.538589
hg19:10:105154057-105154080:-	LTBP3|4054	-0.610323	1.99e-11	5.03e-08	hsa-mir-1307	ENSG00000168056	1	0	1	0	1	1	-0.190985
hg19:1:71533363-71533386:-	ECE1|1889	-0.610303	2e-11	5.03e-08	hsa-mir-186	ENSG00000117298	0	0	1	1	1	0	-0.216816
hg19:9:73424948-73424969:-	PC|5091	-0.610262	2e-11	5.05e-08	hsa-mir-204	ENSG00000173599	0	0	1	0	0	1	-0.544182
hg19:12:57913005-57913028:-	ERBB2|2064	-0.610183	2.02e-11	5.08e-08	hsa-mir-616	ENSG00000141736	1	0	1	0	1	1	-0.297196
hg19:11:57408725-57408745:+	VPS35|55737	-0.610155	2.02e-11	5.09e-08	hsa-mir-130a	ENSG00000069329	1	0	0	1	0	1	-0.295741
hg19:X:49767810-49767832:+	TIPARP|25976	-0.610142	2.03e-11	5.1e-08	hsa-mir-532	ENSG00000163659	0	0	1	0	0	1	-0.11657
hg19:14:100774213-100774235:+	SDC3|9672	-0.60987	2.08e-11	5.21e-08	hsa-mir-345	ENSG00000162512	0	1	0	1	0	0	-0.587847
hg19:X:45605612-45605631:-	NDRG2|57447	-0.609707	2.11e-11	5.27e-08	hsa-mir-221	ENSG00000165795	0	1	1	0	1	1	-0.506926
hg19:X:49777864-49777886:+	BMP1|649	-0.609487	2.16e-11	5.36e-08	hsa-mir-660	ENSG00000168487	1	0	1	1	1	1	-0.327858
hg19:10:104196276-104196299:+	SH2D6|284948	-0.609454	2.16e-11	5.38e-08	hsa-mir-146b	ENSG00000152292	0	1	0	0	1	0	-0.558954
hg19:7:129414807-129414828:-	SERTAD2|9792	-0.609389	2.18e-11	5.41e-08	hsa-mir-183	ENSG00000179833	1	0	0	1	0	0	-0.51963
hg19:19:13985724-13985747:+	ADD2|119	-0.609375	2.18e-11	5.41e-08	hsa-mir-181d	ENSG00000075340	0	0	1	0	0	1	-0.217736
hg19:21:17962573-17962596:+	PIP4K2C|79837	-0.609311	2.19e-11	5.44e-08	hsa-mir-125b-2	ENSG00000166908	1	0	0	0	0	1	-0.330331
hg19:1:41220044-41220064:+	TMC8|147138	-0.609118	2.24e-11	5.52e-08	hsa-mir-30e	ENSG00000167895	1	0	0	1	0	0	-0.225624
hg19:16:15737158-15737180:+	DOCK9|23348	-0.609116	2.24e-11	5.52e-08	hsa-mir-484	ENSG00000088387	1	0	0	0	1	0	-0.401523
hg19:1:71533364-71533386:-	DUSP4|1846	-0.609037	2.25e-11	5.55e-08	hsa-mir-186	ENSG00000120875	0	1	0	1	0	0	-0.250569
hg19:X:45605608-45605631:-	HIVEP3|59269	-0.608881	2.29e-11	5.62e-08	hsa-mir-221	ENSG00000127124	0	0	1	0	1	1	-0.40231
hg19:5:136983270-136983293:-	SHISA5|51246	-0.608745	2.32e-11	5.68e-08	hsa-mir-874	ENSG00000164054	1	0	1	1	0	0	-0.544919
hg19:10:104196276-104196299:+	LAMB4|22798	-0.608668	2.33e-11	5.71e-08	hsa-mir-146b	ENSG00000091128	0	0	1	0	0	1	-0.371589
hg19:14:100774213-100774232:+	RYR1|6261	-0.608655	2.34e-11	5.72e-08	hsa-mir-345	ENSG00000196218	1	0	1	0	0	1	-0.416954
hg19:10:104196277-104196299:+	PFKFB2|5208	-0.608654	2.34e-11	5.72e-08	hsa-mir-146b	ENSG00000123836	1	1	0	1	1	1	-0.470945
hg19:1:209605511-209605533:+	CNNM1|26507	-0.608626	2.34e-11	5.73e-08	hsa-mir-205	ENSG00000119946	1	0	0	1	0	1	-0.14592
hg19:14:100774213-100774235:+	CLU|1191	-0.608606	2.35e-11	5.74e-08	hsa-mir-345	ENSG00000120885	0	1	1	0	1	1	-0.404816
hg19:17:46114539-46114561:-	FMNL1|752	-0.608567	2.36e-11	5.75e-08	hsa-mir-152	ENSG00000184922	0	0	1	0	0	1	-0.437626
hg19:5:136983271-136983293:-	TMPRSS6|164656	-0.608552	2.36e-11	5.76e-08	hsa-mir-874	ENSG00000187045	1	1	0	1	0	1	-0.282521
hg19:7:25989540-25989564:-	RASA4|10156	-0.60835	2.41e-11	5.85e-08	hsa-mir-148a	ENSG00000105808	1	0	0	1	0	0	-0.24901
hg19:1:41220043-41220064:+	FAP|2191	-0.608344	2.41e-11	5.85e-08	hsa-mir-30e	ENSG00000078098	0	0	1	1	0	0	-0.392224
hg19:10:104196277-104196297:+	EDARADD|128178	-0.60833	2.41e-11	5.86e-08	hsa-mir-146b	ENSG00000186197	1	0	0	1	0	1	-0.432602
hg19:X:109298617-109298639:+	SHROOM3|57619	-0.608225	2.43e-11	5.9e-08	hsa-mir-652	ENSG00000138771	1	0	1	1	0	1	-0.257345
hg19:17:1617208-1617229:-	CDC25B|994	-0.608192	2.44e-11	5.92e-08	hsa-mir-22	ENSG00000101224	0	0	1	1	1	0	-0.180153
hg19:1:205417492-205417512:-	TMEM63C|57156	-0.608151	2.45e-11	5.94e-08	hsa-mir-135b	ENSG00000165548	0	0	1	1	0	0	-0.324003
hg19:10:104196277-104196297:+	NCAM1|4684	-0.60807	2.47e-11	5.97e-08	hsa-mir-146b	ENSG00000262279	1	0	1	0	1	1	-0.547141
hg19:19:13985724-13985747:+	UBASH3B|84959	-0.608015	2.48e-11	6e-08	hsa-mir-181d	ENSG00000154127	0	0	1	0	0	1	-0.34381
hg19:14:100774213-100774234:+	TMC8|147138	-0.607978	2.49e-11	6.02e-08	hsa-mir-345	ENSG00000167895	0	0	1	1	0	0	-0.420156
hg19:7:25989580-25989602:-	SCARA3|51435	-0.607953	2.5e-11	6.03e-08	hsa-mir-148a	ENSG00000168077	1	0	1	1	0	0	-0.248098
hg19:5:136983272-136983293:-	MYL4|4635	-0.607928	2.5e-11	6.04e-08	hsa-mir-874	ENSG00000198336	1	0	0	0	0	1	-0.346548
hg19:1:41220044-41220065:+	INPP4A|3631	-0.607864	2.52e-11	6.07e-08	hsa-mir-30e	ENSG00000040933	1	0	1	1	0	1	-0.36723
hg19:5:136983273-136983293:-	HDAC7|51564	-0.607798	2.53e-11	6.1e-08	hsa-mir-874	ENSG00000061273	1	0	0	0	1	0	-0.367122
hg19:1:110141562-110141584:+	IQCA1|79781	-0.607709	2.56e-11	6.14e-08	hsa-mir-197	ENSG00000132321	1	0	0	0	0	1	-0.324768
hg19:1:41220044-41220069:+	LCA5|167691	-0.607681	2.56e-11	6.16e-08	hsa-mir-30e	ENSG00000135338	1	0	0	1	0	1	-0.171628
hg19:17:19247826-19247848:-	ITGB2|3689	-0.607472	2.61e-11	6.26e-08	hsa-mir-1180	ENSG00000160255	0	1	0	0	0	1	-0.554392
hg19:5:136983269-136983293:-	MFGE8|4240	-0.607442	2.62e-11	6.27e-08	hsa-mir-874	ENSG00000140545	1	0	1	1	0	1	-0.245101
hg19:17:1617207-1617229:-	GRB7|2886	-0.60738	2.64e-11	6.3e-08	hsa-mir-22	ENSG00000141738	0	0	1	0	0	1	-0.307701
hg19:10:104196277-104196301:+	P4HB|5034	-0.607192	2.68e-11	6.39e-08	hsa-mir-146b	ENSG00000185624	1	0	1	0	0	1	-0.484276
hg19:X:45605610-45605630:-	RAP1GAP|5909	-0.607126	2.7e-11	6.42e-08	hsa-mir-221	ENSG00000076864	0	0	1	0	1	1	-0.419974
hg19:16:56892439-56892462:+	RAD23B|5887	-0.607038	2.72e-11	6.47e-08	hsa-mir-138-2	ENSG00000119318	1	0	0	1	0	0	-0.368357
hg19:1:41220043-41220064:+	ANKLE2|23141	-0.607017	2.73e-11	6.48e-08	hsa-mir-30e	ENSG00000176915	0	1	1	0	1	0	-0.375967
hg19:5:136983269-136983293:-	SPATS2L|26010	-0.607009	2.73e-11	6.48e-08	hsa-mir-874	ENSG00000196141	0	1	0	0	0	1	-0.367607
hg19:1:209605511-209605533:+	TRAPPC6B|122553	-0.607001	2.73e-11	6.48e-08	hsa-mir-205	ENSG00000182400	1	0	0	1	0	0	-0.370245
hg19:5:136983269-136983293:-	PBX2|5089	-0.606866	2.77e-11	6.55e-08	hsa-mir-874	ENSG00000237344	1	0	1	0	0	1	-0.261364
hg19:9:97848344-97848366:-	DUSP4|1846	-0.606841	2.78e-11	6.56e-08	hsa-mir-3074	ENSG00000120875	0	0	1	1	0	1	-0.416533
hg19:9:73424946-73424969:-	SEH1L|81929	-0.606775	2.79e-11	6.59e-08	hsa-mir-204	ENSG00000085415	0	1	0	1	0	0	-0.500158
hg19:X:45605610-45605631:-	PAPOLA|10914	-0.606741	2.8e-11	6.61e-08	hsa-mir-221	ENSG00000090060	1	0	1	1	0	0	-0.411352
hg19:9:97847787-97847809:+	RAVER2|55225	-0.606738	2.8e-11	6.61e-08	hsa-mir-27b	ENSG00000162437	1	0	0	1	0	0	-0.272921
hg19:10:104196276-104196298:+	ZNF536|9745	-0.606734	2.8e-11	6.61e-08	hsa-mir-146b	ENSG00000198597	0	0	1	0	1	1	-0.494138
hg19:1:41220043-41220065:+	PDE5A|8654	-0.606643	2.83e-11	6.66e-08	hsa-mir-30e	ENSG00000138735	1	0	1	1	0	1	-0.388904
hg19:1:41220044-41220069:+	MAP3K1|4214	-0.606518	2.86e-11	6.73e-08	hsa-mir-30e	ENSG00000095015	1	0	0	0	0	1	-0.178288
hg19:10:104196277-104196297:+	GBA2|57704	-0.606233	2.94e-11	6.88e-08	hsa-mir-146b	ENSG00000070610	0	1	0	0	0	1	-0.52708
hg19:6:72113257-72113277:-	LASP1|3927	-0.606098	2.98e-11	6.95e-08	hsa-mir-30a	ENSG00000002834	0	0	1	0	1	0	-0.569088
hg19:5:136983270-136983293:-	LPAR5|57121	-0.606061	2.99e-11	6.97e-08	hsa-mir-874	ENSG00000184574	0	0	1	1	1	0	-0.138979
hg19:1:41220044-41220066:+	KRT15|3866	-0.605965	3.02e-11	7.02e-08	hsa-mir-30e	ENSG00000171346	0	1	0	1	1	0	-0.531386
hg19:16:15737158-15737181:+	RAB11FIP1|80223	-0.605949	3.02e-11	7.03e-08	hsa-mir-484	ENSG00000156675	1	0	1	1	0	1	-0.450319
hg19:17:1617209-1617230:-	BNIPL|149428	-0.605928	3.03e-11	7.05e-08	hsa-mir-22	ENSG00000163141	1	0	0	1	1	1	-0.539366
hg19:14:100774213-100774235:+	DMD|1756	-0.605677	3.1e-11	7.18e-08	hsa-mir-345	ENSG00000198947	0	0	1	0	0	1	-0.327948
hg19:1:41220085-41220107:+	KHDRBS1|10657	-0.605669	3.1e-11	7.19e-08	hsa-mir-30e	ENSG00000121774	1	0	0	0	0	1	-0.187946
hg19:X:49767773-49767794:+	LASP1|3927	-0.605512	3.15e-11	7.27e-08	hsa-mir-532	ENSG00000002834	1	0	0	1	0	0	-0.1943
hg19:1:110141562-110141584:+	NAV2|89797	-0.605452	3.17e-11	7.31e-08	hsa-mir-197	ENSG00000166833	1	1	1	1	0	1	-0.332663
hg19:10:104196277-104196297:+	PDE11A|50940	-0.605429	3.17e-11	7.32e-08	hsa-mir-146b	ENSG00000128655	0	0	1	1	0	0	-0.437511
hg19:5:136983272-136983293:-	UNC13D|201294	-0.605356	3.19e-11	7.36e-08	hsa-mir-874	ENSG00000092929	1	0	1	0	0	1	-0.500101
hg19:22:20020676-20020698:+	CDK9|1025	-0.605322	3.2e-11	7.38e-08	hsa-mir-185	ENSG00000136807	1	0	0	0	0	1	-0.287559
hg19:10:104196276-104196299:+	ACSF2|80221	-0.605218	3.24e-11	7.44e-08	hsa-mir-146b	ENSG00000167107	1	0	1	0	1	0	-0.563092
hg19:22:20020676-20020698:+	ARHGEF2|9181	-0.60513	3.26e-11	7.49e-08	hsa-mir-185	ENSG00000116584	0	1	0	1	0	1	-0.104294
hg19:5:148441936-148441958:-	MET|4233	-0.604972	3.31e-11	7.57e-08	hsa-mir-584	ENSG00000105976	0	0	1	0	0	1	-0.119623
hg19:17:57918634-57918656:+	TBCE|6905	-0.604954	3.32e-11	7.59e-08	hsa-mir-21	ENSG00000116957	0	0	1	0	0	1	-0.42945
hg19:1:71533362-71533386:-	IQCA1|79781	-0.604762	3.38e-11	7.69e-08	hsa-mir-186	ENSG00000132321	1	1	1	1	0	0	-0.232689
hg19:16:69967045-69967068:+	PTK7|5754	-0.60473	3.39e-11	7.71e-08	hsa-mir-140	ENSG00000112655	1	0	0	0	0	1	-0.188088
hg19:11:72326111-72326133:-	GRM4|2914	-0.60468	3.4e-11	7.74e-08	hsa-mir-139	ENSG00000124493	1	0	1	0	0	1	-0.234616
hg19:12:7073276-7073296:+	CSF1R|1436	-0.604663	3.41e-11	7.75e-08	hsa-mir-141	ENSG00000182578	0	0	1	0	0	1	-0.298321
hg19:14:100774213-100774234:+	FN1|2335	-0.604555	3.44e-11	7.81e-08	hsa-mir-345	ENSG00000115414	1	0	1	1	0	1	-0.482642
hg19:1:41220044-41220066:+	FAM65B|9750	-0.60455	3.45e-11	7.82e-08	hsa-mir-30e	ENSG00000111913	0	0	1	1	0	1	-0.492319
hg19:10:104196276-104196298:+	NETO2|81831	-0.604524	3.45e-11	7.83e-08	hsa-mir-146b	ENSG00000171208	1	0	0	1	0	0	-0.503654
hg19:3:168269702-168269723:+	C8orf12|83656	-0.604493	3.46e-11	7.85e-08	hsa-mir-551b	ENSG00000184608	0	1	0	0	1	0	-0.567155
hg19:X:49774380-49774402:+	SCN5A|6331	-0.604428	3.49e-11	7.89e-08	hsa-mir-501	ENSG00000183873	1	0	1	0	0	1	-0.152207
hg19:17:19247827-19247848:-	CD84|8832	-0.604416	3.49e-11	7.89e-08	hsa-mir-1180	ENSG00000066294	1	0	0	0	0	1	-0.285134
hg19:10:104196277-104196301:+	KDM4B|23030	-0.604331	3.52e-11	7.95e-08	hsa-mir-146b	ENSG00000127663	0	0	1	1	0	1	-0.484154
hg19:12:95702256-95702277:+	COL8A2|1296	-0.60423	3.55e-11	8e-08	hsa-mir-331	ENSG00000171812	1	0	0	1	0	1	-0.280621
hg19:5:136983269-136983293:-	RHOU|58480	-0.604158	3.57e-11	8.05e-08	hsa-mir-874	ENSG00000116574	0	1	0	1	1	0	-0.366592
hg19:8:22102486-22102509:-	KLHL2|11275	-0.604059	3.61e-11	8.11e-08	hsa-mir-320a	ENSG00000109466	0	0	1	0	1	0	-0.201543
hg19:1:71533363-71533386:-	NRP2|8828	-0.604045	3.61e-11	8.12e-08	hsa-mir-186	ENSG00000118257	0	0	1	1	0	0	-0.270287
hg19:1:71533362-71533386:-	WNT5A|7474	-0.603785	3.7e-11	8.27e-08	hsa-mir-186	ENSG00000114251	1	0	0	1	1	1	-0.171503
hg19:5:136983270-136983293:-	AEBP1|165	-0.603772	3.71e-11	8.28e-08	hsa-mir-874	ENSG00000106624	0	0	1	0	0	1	-0.411087
hg19:5:136983271-136983293:-	FAM65B|9750	-0.603727	3.72e-11	8.31e-08	hsa-mir-874	ENSG00000111913	1	0	0	0	1	0	-0.624591
hg19:12:7073276-7073296:+	KCNMA1|3778	-0.603723	3.72e-11	8.31e-08	hsa-mir-141	ENSG00000156113	0	0	1	0	0	1	-0.133298
hg19:1:207975248-207975269:-	PPL|5493	-0.603694	3.73e-11	8.33e-08	hsa-mir-29c	ENSG00000118898	1	0	1	0	0	1	-0.357916
hg19:X:109298617-109298639:+	AHNAK2|113146	-0.603686	3.74e-11	8.33e-08	hsa-mir-652	ENSG00000185567	1	0	0	1	0	1	-0.393348
hg19:15:89151352-89151373:+	CD86|942	-0.603638	3.75e-11	8.36e-08	hsa-mir-1179	ENSG00000114013	0	0	1	0	1	0	-0.212802
hg19:12:54731062-54731084:+	MAMLD1|10046	-0.603617	3.76e-11	8.37e-08	hsa-mir-148b	ENSG00000013619	1	1	1	1	0	1	-0.400886
hg19:11:79113075-79113096:-	ABAT|18	-0.603434	3.83e-11	8.49e-08	hsa-mir-708	ENSG00000183044	1	0	0	1	0	0	-0.345348
hg19:1:41220085-41220107:+	VWA5A|4013	-0.603428	3.83e-11	8.49e-08	hsa-mir-30e	ENSG00000110002	1	0	0	1	0	1	-0.306302
hg19:1:41220085-41220107:+	TMEM87A|25963	-0.603385	3.84e-11	8.52e-08	hsa-mir-30e	ENSG00000103978	1	1	0	0	1	1	-0.270624
hg19:10:104196277-104196297:+	DUS2L|54920	-0.603339	3.86e-11	8.55e-08	hsa-mir-146b	ENSG00000167264	0	1	0	0	1	0	-0.428727
hg19:5:148441937-148441958:-	SHF|90525	-0.60315	3.93e-11	8.67e-08	hsa-mir-584	ENSG00000138606	0	1	1	1	0	0	-0.338203
hg19:5:136983269-136983293:-	SHROOM4|57477	-0.603088	3.95e-11	8.71e-08	hsa-mir-874	ENSG00000158352	1	0	1	1	0	1	-0.334944
hg19:12:54731062-54731084:+	LDLR|3949	-0.603085	3.95e-11	8.71e-08	hsa-mir-148b	ENSG00000130164	1	0	1	1	0	0	-0.5389
hg19:12:54731062-54731084:+	RUNX2|860	-0.602943	4.01e-11	8.81e-08	hsa-mir-148b	ENSG00000124813	1	0	0	1	0	1	-0.338457
hg19:10:104196277-104196296:+	FAHD2A|51011	-0.602896	4.02e-11	8.84e-08	hsa-mir-146b	ENSG00000115042	0	0	1	1	0	0	-0.433126
hg19:16:15737158-15737181:+	TTL|150465	-0.602845	4.04e-11	8.88e-08	hsa-mir-484	ENSG00000114999	1	0	0	1	0	1	-0.51234
hg19:8:22102486-22102508:-	PPP2CB|5516	-0.602829	4.05e-11	8.89e-08	hsa-mir-320a	ENSG00000104695	0	1	0	0	0	1	-0.121796
hg19:22:31127597-31127620:+	CP|1356	-0.602621	4.13e-11	9.03e-08	hsa-mir-3200	ENSG00000047457	0	0	1	1	0	1	-0.479477
hg19:22:20020676-20020698:+	ECE1|1889	-0.602595	4.14e-11	9.05e-08	hsa-mir-185	ENSG00000117298	1	0	1	1	1	1	-0.280314
hg19:X:49767773-49767794:+	MAST3|23031	-0.602587	4.14e-11	9.05e-08	hsa-mir-532	ENSG00000099308	0	0	1	0	0	1	-0.393046
hg19:9:73424947-73424969:-	CHI3L1|1116	-0.602585	4.14e-11	9.05e-08	hsa-mir-204	ENSG00000133048	1	0	0	1	1	1	-0.532758
hg19:22:20020676-20020698:+	PRKD2|25865	-0.602502	4.17e-11	9.11e-08	hsa-mir-185	ENSG00000105287	0	1	1	0	1	1	-0.337255
hg19:5:136983271-136983292:-	SCARA3|51435	-0.602498	4.18e-11	9.11e-08	hsa-mir-874	ENSG00000168077	1	0	0	1	0	0	-0.394689
hg19:1:41220085-41220107:+	EPS8|2059	-0.602444	4.2e-11	9.15e-08	hsa-mir-30e	ENSG00000151491	1	1	0	1	0	1	-0.361283
hg19:17:1617208-1617229:-	IKZF2|22807	-0.602397	4.22e-11	9.18e-08	hsa-mir-22	ENSG00000030419	1	0	0	0	0	1	-0.480499
hg19:22:20020676-20020698:+	LOXL1|4016	-0.602348	4.23e-11	9.22e-08	hsa-mir-185	ENSG00000129038	0	1	1	1	1	1	-0.302441
hg19:21:17962573-17962596:+	GPR61|83873	-0.602335	4.24e-11	9.22e-08	hsa-mir-125b-2	ENSG00000156097	0	1	0	0	0	1	-0.351616
hg19:X:45605607-45605631:-	PHACTR4|65979	-0.602245	4.28e-11	9.29e-08	hsa-mir-221	ENSG00000204138	1	0	1	0	0	1	-0.495224
hg19:10:104196276-104196299:+	DPY19L2|283417	-0.602172	4.3e-11	9.34e-08	hsa-mir-146b	ENSG00000177990	0	0	1	1	0	0	-0.422158
hg19:10:104196276-104196299:+	SLC22A23|63027	-0.602011	4.37e-11	9.45e-08	hsa-mir-146b	ENSG00000137266	1	0	0	0	1	1	-0.528062
hg19:10:104196277-104196297:+	DGKI|9162	-0.602003	4.37e-11	9.46e-08	hsa-mir-146b	ENSG00000157680	1	0	0	0	1	1	-0.507623
hg19:5:136983270-136983293:-	TMC8|147138	-0.601905	4.41e-11	9.53e-08	hsa-mir-874	ENSG00000167895	1	0	1	1	0	1	-0.266874
hg19:12:54731062-54731084:+	CNIH3|149111	-0.601867	4.43e-11	9.56e-08	hsa-mir-148b	ENSG00000143786	1	0	0	0	0	1	-0.14565
hg19:3:52302352-52302374:-	PCNXL2|80003	-0.601716	4.49e-11	9.68e-08	hsa-let-7g	ENSG00000135749	0	0	1	1	1	1	-0.280269
hg19:X:45605609-45605630:-	IPCEF1|26034	-0.601695	4.5e-11	9.69e-08	hsa-mir-221	ENSG00000074706	1	0	0	0	0	1	-0.541549
hg19:11:79113075-79113097:-	NFATC4|4776	-0.601695	4.5e-11	9.69e-08	hsa-mir-708	ENSG00000100968	0	0	1	0	1	1	-0.236534
hg19:1:41220044-41220066:+	QSOX1|5768	-0.601544	4.56e-11	9.8e-08	hsa-mir-30e	ENSG00000116260	1	0	0	1	0	1	-0.508596
hg19:10:104196276-104196299:+	FLRT1|23769	-0.601361	4.64e-11	9.94e-08	hsa-mir-146b	ENSG00000126500	0	0	1	0	1	0	-0.485727
hg19:11:121970518-121970539:-	DHTKD1|55526	-0.601352	4.65e-11	9.94e-08	hsa-mir-125b-1	ENSG00000181192	0	0	1	0	0	1	-0.370937
hg19:17:57918634-57918654:+	MAPT|4137	-0.601315	4.66e-11	9.97e-08	hsa-mir-21	ENSG00000186868	1	0	0	0	1	0	-0.572422
hg19:X:45606440-45606463:-	NFATC3|4775	-0.601284	4.68e-11	9.99e-08	hsa-mir-222	ENSG00000072736	0	0	1	1	0	0	-0.432109
hg19:11:57408725-57408748:+	DARS2|55157	-0.601154	4.73e-11	1.01e-07	hsa-mir-130a	ENSG00000117593	0	1	1	0	1	1	-0.326279
hg19:5:136983271-136983293:-	SERPINA1|5265	-0.601135	4.74e-11	1.01e-07	hsa-mir-874	ENSG00000197249	1	0	1	0	1	0	-0.334891
hg19:14:100774213-100774233:+	IL13RA1|3597	-0.601111	4.75e-11	1.01e-07	hsa-mir-345	ENSG00000131724	1	0	1	0	0	1	-0.333036
hg19:X:133303880-133303903:-	NRIP1|8204	-0.601064	4.77e-11	1.02e-07	hsa-mir-20b	ENSG00000180530	0	0	1	1	1	0	-0.276308
hg19:10:105154056-105154080:-	LRP1|4035	-0.601051	4.78e-11	1.02e-07	hsa-mir-1307	ENSG00000123384	1	0	1	0	0	1	-0.327831
hg19:10:104196277-104196300:+	PTPRQ|374462	-0.601026	4.79e-11	1.02e-07	hsa-mir-146b	ENSG00000139304	0	0	1	0	0	1	-0.464114
hg19:10:104196314-104196333:+	ATP5A1|498	-0.600906	4.84e-11	1.03e-07	hsa-mir-146b	ENSG00000152234	1	0	1	0	1	1	-0.338474
hg19:10:104196277-104196297:+	MATN2|4147	-0.600902	4.84e-11	1.03e-07	hsa-mir-146b	ENSG00000132561	0	0	1	0	1	1	-0.518217
hg19:5:148441937-148441958:-	SCARA3|51435	-0.600812	4.88e-11	1.04e-07	hsa-mir-584	ENSG00000168077	1	0	0	0	0	1	-0.252028
hg19:1:207975248-207975269:-	TMEM98|26022	-0.600775	4.9e-11	1.04e-07	hsa-mir-29c	ENSG00000006042	1	0	0	0	0	1	-0.215048
hg19:8:22102488-22102509:-	RAD50|10111	-0.600733	4.92e-11	1.04e-07	hsa-mir-320a	ENSG00000113522	0	1	0	1	0	0	-0.115196
hg19:6:72113299-72113320:-	SERPINF2|5345	-0.60068	4.94e-11	1.05e-07	hsa-mir-30a	ENSG00000167711	0	0	1	1	0	0	-0.378214
hg19:5:136983273-136983293:-	BCL11A|53335	-0.600628	4.97e-11	1.05e-07	hsa-mir-874	ENSG00000119866	1	0	1	0	0	1	-0.252706
hg19:19:13947106-13947125:-	FERMT1|55612	-0.600568	5e-11	1.05e-07	hsa-mir-24-2	ENSG00000101311	0	0	1	1	0	0	-0.161797
hg19:X:49767773-49767795:+	PCNXL2|80003	-0.600388	5.08e-11	1.07e-07	hsa-mir-532	ENSG00000135749	1	0	0	0	1	1	-0.362531
hg19:6:72113257-72113277:-	FAM65B|9750	-0.600359	5.09e-11	1.07e-07	hsa-mir-30a	ENSG00000111913	0	0	1	1	0	1	-0.568391
hg19:11:57408725-57408747:+	SETD7|80854	-0.600359	5.09e-11	1.07e-07	hsa-mir-130a	ENSG00000145391	1	0	0	1	0	0	-0.463133
hg19:9:97848344-97848366:-	NBAS|51594	-0.600298	5.12e-11	1.08e-07	hsa-mir-3074	ENSG00000151779	0	0	1	0	0	1	-0.221776
hg19:17:46114539-46114561:-	RAD23B|5887	-0.600181	5.18e-11	1.09e-07	hsa-mir-152	ENSG00000119318	1	0	0	0	1	1	-0.32521
hg19:X:49767773-49767794:+	EPHB3|2049	-0.600169	5.18e-11	1.09e-07	hsa-mir-532	ENSG00000182580	1	0	1	0	0	1	-0.143798
hg19:5:136983273-136983293:-	SH3GL1|6455	-0.600127	5.21e-11	1.09e-07	hsa-mir-874	ENSG00000141985	1	0	0	1	0	1	-0.339649
hg19:9:116971767-116971787:+	SNX27|81609	-0.600012	5.26e-11	1.1e-07	hsa-mir-455	ENSG00000143376	1	0	0	1	0	0	-0.333975
