# Supplementary material for: Differences in miRNA and mRNA Profile of Papillary Thyroid Cancer Variants
Source: Int J Endocrinol. 2016 Aug 30;2016:1427042. doi: 10.1155/2016/1427042 (PMC5021476; doi:10.1155/2016/1427042)
Supplement: Supplementary file 1 — Figure illustrates clustering of data due to batch effects present in TCGA miRNA and mRNA datasets (A, C). Samples sequenced in one batch are marked with the same color. After batch removal procedure clustering effects are not observed (B, D). Supplementary File 2. Figure illustrates analysis pipeline for 2 datasets - 466 samples. It provides overview how the study was designed. [file 1427042.f1.zip › Supplementary Table S3 131201.xlsx]

## Sheet: correlation_tcPTC_0.6_miranda_t
miR position	gene id	correlation	p-value	FDR	mature mir	ensembl	p3 miranda	p5 miranda	coding miranda	p3 targetscan	p5 targetscan	coding targetscan	correlation in cPTC
hg19:14:100576011-100576035:+	KCNG3|170850	-0.87434	6.8e-12	1.02e-05	hsa-mir-342	ENSG00000171126	0	0	1	0	0	1	-0.428126
hg19:15:89155126-89155146:+	SDC3|9672	-0.833216	5.27e-10	0.000177038	hsa-mir-7-2	ENSG00000162512	1	0	0	1	0	0	-0.291875
hg19:17:57215146-57215171:-	TBX10|347853	-0.830844	6.53e-10	0.000204675	hsa-mir-454	ENSG00000167800	0	0	1	0	0	1	-0.0911621
hg19:9:97847745-97847767:+	RALA|5898	-0.783473	2.63e-08	0.0015212	hsa-mir-27b	ENSG00000006451	1	0	0	1	0	0	-0.458129
hg19:22:20073595-20073614:+	CXorf22|170063	-0.782327	2.84e-08	0.001582	hsa-mir-1306	ENSG00000165164	0	0	1	0	0	1	-0.181515
hg19:7:130561543-130561567:-	MOXD1|26002	-0.781132	3.08e-08	0.00165458	hsa-mir-29a	ENSG00000079931	1	0	0	0	0	1	0.0558916
hg19:X:133675398-133675416:-	IGF2BP2|10644	-0.778075	3.78e-08	0.00181986	hsa-mir-542	ENSG00000073792	1	0	0	1	0	1	-0.268264
hg19:11:72326146-72326165:-	TEDDM1|127670	-0.765283	8.58e-08	0.00273001	hsa-mir-139	ENSG00000203730	1	0	0	0	1	0	-0.185118
hg19:1:41220086-41220108:+	VWA3B|200403	-0.76454	8.99e-08	0.00280097	hsa-mir-30e	ENSG00000168658	0	1	1	0	0	1	-0.0902517
hg19:21:17962609-17962631:+	GCNT3|9245	-0.762465	1.02e-07	0.0029695	hsa-mir-125b-2	ENSG00000140297	0	0	1	0	1	1	-0.132364
hg19:19:46142267-46142290:-	ENAM|10117	-0.761103	1.11e-07	0.00312967	hsa-mir-330	ENSG00000132464	0	0	1	0	0	1	-0.267618
hg19:9:97847745-97847767:+	DAPP1|27071	-0.759104	1.25e-07	0.0032998	hsa-mir-27b	ENSG00000070190	0	0	1	1	1	0	-0.379194
hg19:17:56408604-56408626:-	IQUB|154865	-0.751699	1.94e-07	0.00410178	hsa-mir-142	ENSG00000164675	1	0	1	0	0	1	-0.464015
hg19:X:49767773-49767794:+	KNDC1|85442	-0.75042	2.09e-07	0.00424099	hsa-mir-532	ENSG00000171798	1	0	1	1	0	1	-0.233948
hg19:12:7072910-7072927:+	LIPH|200879	-0.749173	2.25e-07	0.0043851	hsa-mir-200c	ENSG00000163898	1	0	1	0	0	1	-0.382265
hg19:12:7073276-7073298:+	NDRG1|10397	-0.748739	2.31e-07	0.00441144	hsa-mir-141	ENSG00000104419	0	1	0	0	1	0	-0.303324
hg19:2:177015063-177015079:+	CAGE1|285782	-0.74716	2.52e-07	0.00463473	hsa-mir-10b	ENSG00000164304	1	0	1	0	0	1	0.0347018
hg19:X:133680710-133680731:-	SYNPO2L|79933	-0.745469	2.78e-07	0.00486978	hsa-mir-424	ENSG00000166317	0	0	1	0	0	1	0.085586
hg19:16:67236230-67236252:-	MPZL1|9019	-0.743417	3.12e-07	0.00515228	hsa-mir-328	ENSG00000197965	1	0	0	1	0	0	-0.505703
hg19:17:29887071-29887091:+	C17orf47|284083	-0.74231	3.32e-07	0.00531359	hsa-mir-193a	ENSG00000181013	0	0	1	0	1	0	-0.0155158
hg19:9:97847745-97847767:+	PGBD5|79605	-0.740896	3.59e-07	0.00551282	hsa-mir-27b	ENSG00000177614	1	0	0	1	0	0	-0.429993
hg19:21:17911420-17911443:+	FN1|2335	-0.737767	4.26e-07	0.00603709	hsa-mir-99a	ENSG00000115414	0	0	1	0	0	1	-0.141299
hg19:8:10524498-10524518:+	SEZ6|124925	-0.737416	4.35e-07	0.00607913	hsa-mir-4286	ENSG00000063015	1	0	0	0	1	1	-0.487045
hg19:19:52196521-52196541:+	MPZL1|9019	-0.737255	4.38e-07	0.00610343	hsa-mir-125a	ENSG00000197965	1	0	1	1	1	0	-0.427979
hg19:12:7072910-7072927:+	ERBB3|2065	-0.736135	4.66e-07	0.00627904	hsa-mir-200c	ENSG00000065361	0	1	1	1	0	0	-0.266793
hg19:6:72086708-72086729:-	VDR|7421	-0.734454	5.1e-07	0.0065275	hsa-mir-30c-2	ENSG00000111424	1	0	0	0	1	0	-0.532845
hg19:16:67236230-67236252:-	KIAA1755|85449	-0.734174	5.18e-07	0.00656129	hsa-mir-328	ENSG00000149633	0	0	1	1	0	1	-0.546052
hg19:10:105154056-105154079:-	AOC3|8639	-0.732773	5.59e-07	0.0068091	hsa-mir-1307	ENSG00000131471	0	0	1	0	0	1	-0.171738
hg19:14:101521801-101521823:+	BCL7A|605	-0.732572	5.65e-07	0.00685134	hsa-mir-485	ENSG00000110987	1	0	0	0	1	0	-0.138938
hg19:19:50004055-50004076:-	ZNF747|65988	-0.732502	5.67e-07	0.00685134	hsa-mir-150	ENSG00000169955	1	0	1	1	0	0	-0.240666
hg19:10:104196276-104196297:+	ZMAT4|79698	-0.731988	5.82e-07	0.00696774	hsa-mir-146b	ENSG00000165061	1	0	0	0	1	0	-0.504954
hg19:17:28444149-28444171:+	FBLN2|2199	-0.731933	5.84e-07	0.00696774	hsa-mir-423	ENSG00000163520	0	1	1	0	1	1	-0.387249
hg19:1:155165028-155165047:+	NDRG2|57447	-0.729972	6.48e-07	0.00734373	hsa-mir-92b	ENSG00000165795	0	1	0	0	1	0	-0.44831
hg19:7:129414811-129414829:-	GATM|2628	-0.729934	6.49e-07	0.00735378	hsa-mir-183	ENSG00000171766	0	1	0	0	0	1	-0.343353
hg19:7:150935535-150935558:+	BTNL9|153579	-0.728674	6.94e-07	0.00760449	hsa-mir-671	ENSG00000165810	1	0	0	0	0	1	0.0480302
hg19:17:6921297-6921319:-	CEP76|79959	-0.728291	7.08e-07	0.00766618	hsa-mir-497	ENSG00000101624	1	0	0	1	0	0	-0.401524
hg19:8:17539096-17539119:-	XKR7|343702	-0.726695	7.7e-07	0.00801809	hsa-mir-548v	ENSG00000101321	1	0	0	1	0	0	-0.221703
hg19:2:25551581-25551601:-	KRT85|3891	-0.724716	8.53e-07	0.00841195	hsa-mir-1301	ENSG00000135443	1	0	0	1	0	1	-0.26375
hg19:8:135812815-135812835:-	GNG4|2786	-0.72437	8.68e-07	0.00847523	hsa-mir-30b	ENSG00000168243	1	0	0	1	0	1	-0.169662
hg19:12:95702221-95702241:+	GALNT8|26290	-0.723933	8.88e-07	0.00859865	hsa-mir-331	ENSG00000130035	0	0	1	0	1	0	-0.0558111
hg19:2:177015096-177015116:+	IGF2BP2|10644	-0.723753	8.96e-07	0.00863133	hsa-mir-10b	ENSG00000073792	1	0	1	1	0	1	-0.250585
hg19:X:45606441-45606463:-	ZNF536|9745	-0.723718	8.98e-07	0.00864242	hsa-mir-222	ENSG00000198597	0	0	1	0	0	1	-0.523917
hg19:16:67236231-67236252:-	ANTXR2|118429	-0.722689	9.46e-07	0.00885556	hsa-mir-328	ENSG00000163297	1	0	0	0	1	0	-0.399918
hg19:9:97847547-97847568:+	ETFA|2108	-0.720499	1.06e-06	0.00939876	hsa-mir-23b	ENSG00000140374	0	0	1	0	0	1	-0.18765
hg19:9:96941123-96941144:+	ST3GAL4|6484	-0.720448	1.06e-06	0.00939876	hsa-let-7d	ENSG00000110080	0	1	0	1	0	0	-0.0781108
hg19:9:73424947-73424969:-	ERBB3|2065	-0.720168	1.08e-06	0.00946889	hsa-mir-204	ENSG00000065361	0	0	1	1	1	1	-0.657366
hg19:21:17962610-17962632:+	MIOS|54468	-0.720078	1.08e-06	0.00950494	hsa-mir-125b-2	ENSG00000164654	1	0	0	0	0	1	-0.151114
hg19:6:72113256-72113278:-	TPM3|7170	-0.719518	1.11e-06	0.00965862	hsa-mir-30a	ENSG00000143549	1	0	0	1	1	1	-0.515102
hg19:11:121970520-121970538:-	KRT85|3891	-0.719343	1.12e-06	0.00969565	hsa-mir-125b-1	ENSG00000135443	1	0	0	1	0	0	-0.347838
hg19:7:99691440-99691460:-	WDR90|197335	-0.718126	1.19e-06	0.0100156	hsa-mir-93	ENSG00000161996	0	0	1	0	0	1	-0.0484604
hg19:7:129410287-129410307:-	PPFIBP2|8495	-0.717407	1.24e-06	0.0102134	hsa-mir-182	ENSG00000166387	0	1	0	1	1	1	-0.0683092
hg19:3:168269702-168269723:+	CNTNAP3|79937	-0.716527	1.29e-06	0.0104497	hsa-mir-551b	ENSG00000106714	1	0	1	1	0	1	-0.438322
hg19:16:14397874-14397896:+	DAGLA|747	-0.716527	1.29e-06	0.0104497	hsa-mir-193b	ENSG00000134780	0	0	1	1	0	0	-0.251621
hg19:6:72086708-72086729:-	PTPN7|5778	-0.716246	1.31e-06	0.010535	hsa-mir-30c-2	ENSG00000143851	0	1	0	0	1	0	-0.416897
hg19:X:49767811-49767831:+	TGM4|7047	-0.715303	1.37e-06	0.0107861	hsa-mir-532	ENSG00000163810	1	0	0	1	0	0	-0.0795369
hg19:9:97847745-97847767:+	NEK6|10783	-0.715126	1.39e-06	0.0108314	hsa-mir-27b	ENSG00000119408	1	0	0	1	1	0	-0.407398
hg19:X:45606441-45606462:-	UVRAG|7405	-0.715126	1.39e-06	0.0108314	hsa-mir-222	ENSG00000198382	1	0	0	1	1	1	-0.296239
hg19:16:67236230-67236252:-	GPR68|8111	-0.714846	1.4e-06	0.0109115	hsa-mir-328	ENSG00000119714	1	0	0	0	0	1	-0.479559
hg19:9:131007023-131007046:-	CABLES2|81928	-0.714846	1.4e-06	0.0109115	hsa-mir-199b	ENSG00000149679	1	0	0	1	0	0	-0.296867
hg19:X:133680715-133680732:-	SEZ6|124925	-0.71467	1.42e-06	0.0109748	hsa-mir-424	ENSG00000063015	1	0	0	0	0	1	-0.288991
hg19:12:7073318-7073340:+	PCSK6|5046	-0.714476	1.43e-06	0.011004	hsa-mir-141	ENSG00000140479	1	0	0	0	0	1	-0.227801
hg19:19:46522200-46522219:+	IGF2BP2|10644	-0.714471	1.43e-06	0.0110052	hsa-mir-769	ENSG00000073792	1	0	1	1	0	1	-0.232333
hg19:17:28444149-28444172:+	NCALD|83988	-0.714286	1.44e-06	0.0110354	hsa-mir-423	ENSG00000104490	1	1	0	0	1	1	-0.206034
hg19:17:57918634-57918656:+	ZNF536|9745	-0.714122	1.46e-06	0.0110959	hsa-mir-21	ENSG00000198597	1	0	0	0	0	1	-0.599005
hg19:7:25989542-25989561:-	PLEKHG4|25894	-0.713307	1.52e-06	0.011348	hsa-mir-148a	ENSG00000196155	1	0	1	0	0	1	-0.342692
hg19:5:148808539-148808560:+	MMAA|166785	-0.713265	1.52e-06	0.011357	hsa-mir-143	ENSG00000151611	1	0	0	1	1	1	-0.226411
hg19:7:129410294-129410311:-	UNC5C|8633	-0.712884	1.55e-06	0.0114314	hsa-mir-182	ENSG00000182168	0	1	1	0	0	1	-0.0450472
hg19:5:136983270-136983292:-	HR|55806	-0.712104	1.61e-06	0.0116679	hsa-mir-874	ENSG00000168453	0	1	1	1	1	1	-0.162269
hg19:8:135817122-135817143:-	ENAM|10117	-0.711642	1.64e-06	0.0117955	hsa-mir-30d	ENSG00000132464	0	0	1	0	1	1	-0.0384635
hg19:1:9211795-9211816:-	ARHGAP31|57514	-0.711485	1.66e-06	0.011831	hsa-mir-34a	ENSG00000031081	0	0	1	1	0	0	-0.482361
hg19:X:49773613-49773635:+	TMEM144|55314	-0.70877	1.89e-06	0.0126154	hsa-mir-362	ENSG00000164124	1	0	0	1	0	0	0.0705275
hg19:X:49774343-49774364:+	GABRB2|2561	-0.708732	1.89e-06	0.0126154	hsa-mir-501	ENSG00000145864	1	0	0	1	0	0	-0.259884
hg19:14:101531651-101531674:+	FAM110C|642273	-0.70862	1.9e-06	0.0126493	hsa-mir-409	ENSG00000184731	1	0	0	1	0	0	-0.119843
hg19:X:133680715-133680732:-	CALB1|793	-0.708214	1.94e-06	0.0127975	hsa-mir-424	ENSG00000104327	1	0	0	0	0	1	-0.205833
hg19:17:11985226-11985247:+	ANK2|287	-0.708123	1.95e-06	0.0127982	hsa-mir-744	ENSG00000145362	0	0	1	0	0	1	-0.368949
hg19:X:85158685-85158708:-	RGL1|23179	-0.708123	1.95e-06	0.0127982	hsa-mir-361	ENSG00000143344	1	0	0	1	0	1	-0.142072
hg19:5:136983270-136983292:-	HS6ST1|9394	-0.707341	2.02e-06	0.0130961	hsa-mir-874	ENSG00000136720	1	0	0	1	0	1	-0.134785
hg19:6:72113297-72113319:-	CMTM3|123920	-0.707283	2.03e-06	0.0130961	hsa-mir-30a	ENSG00000140931	1	0	0	1	0	0	-0.5996
hg19:6:72086706-72086729:-	IMPDH1|3614	-0.707283	2.03e-06	0.0130961	hsa-mir-30c-2	ENSG00000106348	1	0	1	0	0	1	-0.502235
hg19:14:101521801-101521823:+	CLPTM1|1209	-0.706929	2.07e-06	0.0132239	hsa-mir-485	ENSG00000104853	0	0	1	0	1	1	-0.180523
hg19:14:100576052-100576076:+	CHRM5|1133	-0.70683	2.07e-06	0.0132714	hsa-mir-342	ENSG00000184984	0	1	0	0	1	1	0.0610613
hg19:7:25989547-25989564:-	ZNF174|7727	-0.706719	2.09e-06	0.0132764	hsa-mir-148a	ENSG00000103343	0	1	0	1	0	1	-0.0658591
hg19:16:14397875-14397896:+	RBBP7|5931	-0.706508	2.11e-06	0.0133723	hsa-mir-193b	ENSG00000102054	0	1	0	0	0	1	0.0124467
hg19:19:50004089-50004111:-	WIPF3|644150	-0.705322	2.23e-06	0.0137565	hsa-mir-150	ENSG00000122574	0	0	1	1	0	1	-0.298947
hg19:6:72086708-72086729:-	TLR2|7097	-0.705042	2.26e-06	0.0138693	hsa-mir-30c-2	ENSG00000137462	0	1	0	0	0	1	-0.436471
hg19:10:104196280-104196300:+	KIF1A|547	-0.704482	2.32e-06	0.0140527	hsa-mir-146b	ENSG00000130294	0	0	1	1	1	1	-0.440193
hg19:3:49058106-49058128:-	SERPINF1|5176	-0.704482	2.32e-06	0.0140527	hsa-mir-191	ENSG00000132386	0	1	0	0	1	1	-0.157618
hg19:10:104196316-104196336:+	PNLDC1|154197	-0.704162	2.36e-06	0.0141869	hsa-mir-146b	ENSG00000146453	0	0	1	0	0	1	0.00909561
hg19:14:101351088-101351109:+	IGF2BP2|10644	-0.703929	2.38e-06	0.0142589	hsa-mir-136	ENSG00000073792	0	0	1	0	0	1	-0.0894264
hg19:5:148810223-148810245:+	TBX10|347853	-0.70362	2.42e-06	0.0143654	hsa-mir-145	ENSG00000167800	0	0	1	1	0	0	-0.0655085
hg19:14:101512305-101512326:+	BCL7A|605	-0.703361	2.45e-06	0.0144471	hsa-mir-381	ENSG00000110987	1	0	0	0	1	1	-0.322987
hg19:X:151127099-151127124:-	ACAT1|38	-0.702795	2.51e-06	0.0146526	hsa-mir-224	ENSG00000075239	1	0	1	1	0	0	-0.160228
hg19:1:110141562-110141583:+	ZNF75D|7626	-0.702521	2.55e-06	0.0147743	hsa-mir-197	ENSG00000186376	0	1	1	0	1	0	-0.256284
hg19:12:62997527-62997546:+	VANGL1|81839	-0.702241	2.58e-06	0.0148551	hsa-let-7i	ENSG00000173218	1	0	0	0	1	1	-0.0666703
hg19:3:188406582-188406603:+	C10orf67|256815	-0.701961	2.61e-06	0.0149405	hsa-mir-28	ENSG00000179133	0	0	1	1	0	0	-0.467372
hg19:21:17962610-17962632:+	AMOTL1|154810	-0.70187	2.62e-06	0.01499	hsa-mir-125b-2	ENSG00000166025	1	0	0	1	0	1	-0.0883797
hg19:14:101513666-101513688:+	CLPTM1|1209	-0.701415	2.68e-06	0.0151454	hsa-mir-539	ENSG00000104853	1	0	1	0	0	1	-0.207988
hg19:22:20073595-20073614:+	ABCG5|64240	-0.701257	2.7e-06	0.0152234	hsa-mir-1306	ENSG00000138075	1	0	0	0	1	1	-0.0528675
hg19:1:205417489-205417512:-	ADPRH|141	-0.70112	2.72e-06	0.0152234	hsa-mir-135b	ENSG00000144843	0	0	1	0	1	0	-0.268904
hg19:X:133675398-133675416:-	PIGL|9487	-0.700804	2.76e-06	0.0153444	hsa-mir-542	ENSG00000108474	1	0	0	1	0	1	0.094414
hg19:3:49058064-49058085:-	MAMLD1|10046	-0.700752	2.77e-06	0.0153667	hsa-mir-191	ENSG00000013619	1	0	1	1	0	0	-0.0376202
hg19:17:57918672-57918691:+	FAM122B|159090	-0.70056	2.79e-06	0.0154171	hsa-mir-21	ENSG00000156504	0	1	0	1	0	1	-0.226028
hg19:17:57918633-57918656:+	USP11|8237	-0.70028	2.83e-06	0.0155292	hsa-mir-21	ENSG00000102226	0	0	1	0	0	1	-0.438819
hg19:5:136983271-136983293:-	ARSI|340075	-0.7	2.86e-06	0.0156365	hsa-mir-874	ENSG00000183876	1	0	0	0	1	0	-0.376636
hg19:10:105154058-105154079:-	ARHGEF17|9828	-0.699909	2.88e-06	0.015685	hsa-mir-1307	ENSG00000110237	0	0	1	0	0	1	-0.361982
hg19:19:46522200-46522219:+	TBC1D29|26083	-0.699501	2.93e-06	0.0158484	hsa-mir-769	ENSG00000266733	0	1	0	0	1	0	-0.306696
hg19:10:132760901-132760922:-	LCMT2|9836	-0.69916	2.98e-06	0.0159649	hsa-mir-378c	ENSG00000168806	1	0	1	0	1	1	-0.177312
hg19:2:177015057-177015076:+	PHF20L1|51105	-0.69916	2.98e-06	0.0159649	hsa-mir-10b	ENSG00000129292	1	0	0	1	1	1	-0.0485138
hg19:17:27188604-27188623:-	PLAG1|5324	-0.699062	2.99e-06	0.0160151	hsa-mir-144	ENSG00000181690	1	0	0	1	0	0	-0.13828
hg19:X:45606438-45606463:-	RELN|5649	-0.698697	3.04e-06	0.0161579	hsa-mir-222	ENSG00000189056	0	0	1	0	0	1	-0.25942
hg19:14:101521031-101521051:+	BCL7A|605	-0.698599	3.06e-06	0.0161597	hsa-mir-134	ENSG00000110987	0	1	0	0	1	0	-0.278808
hg19:5:148810262-148810283:+	PCDHAC2|56134	-0.698409	3.08e-06	0.0162518	hsa-mir-145	ENSG00000243232	1	0	0	0	1	1	-0.134616
hg19:14:101488408-101488426:+	CYP27B1|1594	-0.698318	3.1e-06	0.0162518	hsa-mir-379	ENSG00000111012	0	0	1	1	0	0	-0.022494
hg19:16:67236231-67236252:-	GREM1|26585	-0.698039	3.14e-06	0.016365	hsa-mir-328	ENSG00000166923	1	0	1	1	0	1	-0.460618
hg19:17:28444149-28444171:+	AGPAT4|56895	-0.698039	3.14e-06	0.016365	hsa-mir-423	ENSG00000026652	1	0	1	1	0	0	-0.288627
hg19:19:52196091-52196113:+	HS3ST1|9957	-0.697199	3.26e-06	0.0166613	hsa-let-7e	ENSG00000002587	1	0	0	0	0	1	-0.450028
hg19:7:150935535-150935558:+	KIAA1462|57608	-0.697016	3.29e-06	0.0167756	hsa-mir-671	ENSG00000165757	0	0	1	0	0	1	-0.224557
hg19:7:129410293-129410311:-	IL11RA|3590	-0.696919	3.3e-06	0.0167797	hsa-mir-182	ENSG00000137070	1	1	0	0	1	0	-0.164556
hg19:9:73424948-73424969:-	PLEKHA6|22874	-0.696896	3.31e-06	0.016794	hsa-mir-204	ENSG00000143850	0	1	1	1	1	0	-0.565822
hg19:17:57918617-57918634:+	IGDCC3|9543	-0.696639	3.35e-06	0.0168567	hsa-mir-21	ENSG00000174498	0	0	1	1	0	0	-0.369668
hg19:7:129410289-129410311:-	CIAO1|9391	-0.696547	3.36e-06	0.0169109	hsa-mir-182	ENSG00000144021	0	0	1	0	0	1	-0.307752
hg19:8:135817165-135817184:-	PELO|53918	-0.696407	3.38e-06	0.016962	hsa-mir-30d	ENSG00000152684	1	0	0	1	0	0	-0.120092
hg19:X:133680711-133680731:-	PHLDA1|22822	-0.696293	3.4e-06	0.0170046	hsa-mir-424	ENSG00000139289	1	0	0	1	1	1	0.0138216
hg19:9:131007024-131007045:-	EPB41L1|2036	-0.695518	3.52e-06	0.0173157	hsa-mir-199b	ENSG00000088367	1	0	1	1	1	1	-0.041677
hg19:16:69967006-69967026:+	ACVR2A|92	-0.695396	3.54e-06	0.0173982	hsa-mir-140	ENSG00000121989	1	0	1	0	0	1	-0.122531
hg19:5:148810225-148810247:+	MET|4233	-0.695067	3.6e-06	0.0175407	hsa-mir-145	ENSG00000105976	0	0	1	0	1	1	-0.192473
hg19:9:131007024-131007045:-	FIP1L1|81608	-0.694958	3.61e-06	0.0175476	hsa-mir-199b	ENSG00000145216	1	0	1	0	0	1	-0.299815
hg19:10:105154058-105154079:-	FAM188B|84182	-0.694586	3.68e-06	0.0177236	hsa-mir-1307	ENSG00000106125	0	0	1	0	0	1	-0.209533
hg19:9:97847547-97847568:+	ITGB6|3694	-0.694166	3.75e-06	0.0178977	hsa-mir-23b	ENSG00000115221	1	0	1	1	0	0	-0.423464
hg19:X:20035221-20035241:-	FN1|2335	-0.694106	3.76e-06	0.0179064	hsa-mir-23c	ENSG00000115414	1	0	0	0	0	1	-0.185179
hg19:7:150935535-150935558:+	FBXL16|146330	-0.694075	3.76e-06	0.0179231	hsa-mir-671	ENSG00000127585	1	0	0	1	0	0	-0.00941822
hg19:7:129410286-129410311:-	ADAMTS9|56999	-0.694026	3.77e-06	0.0179557	hsa-mir-182	ENSG00000163638	0	0	1	1	0	1	-0.311026
hg19:17:11985226-11985247:+	NFATC1|4772	-0.693838	3.8e-06	0.0180361	hsa-mir-744	ENSG00000131196	1	0	1	1	1	1	-0.442974
hg19:6:72086707-72086729:-	JAKMIP2|9832	-0.693557	3.85e-06	0.0181558	hsa-mir-30c-2	ENSG00000176049	0	0	1	1	0	0	-0.448119
hg19:19:52196560-52196580:+	WDR90|197335	-0.693438	3.87e-06	0.0182426	hsa-mir-125a	ENSG00000161996	1	0	1	0	0	1	-0.0396813
hg19:5:159912378-159912401:+	RGS5|8490	-0.693005	3.95e-06	0.0183901	hsa-mir-146a	ENSG00000143248	0	1	0	1	0	0	-0.131016
hg19:5:148808541-148808560:+	ZKSCAN2|342357	-0.692906	3.97e-06	0.018443	hsa-mir-143	ENSG00000155592	1	0	0	1	1	1	-0.0816081
hg19:9:73424946-73424969:-	SYTL5|94122	-0.692785	3.99e-06	0.018511	hsa-mir-204	ENSG00000147041	1	0	0	1	0	1	-0.45774
hg19:3:160122395-160122416:+	APOL3|80833	-0.692437	4.05e-06	0.0186242	hsa-mir-15b	ENSG00000128284	1	0	0	0	1	0	-0.29921
hg19:1:41220044-41220062:+	RGS1|5996	-0.692157	4.1e-06	0.0187491	hsa-mir-30e	ENSG00000090104	0	0	1	1	0	0	-0.124847
hg19:12:7072904-7072926:+	CGREF1|10669	-0.691877	4.16e-06	0.0188689	hsa-mir-200c	ENSG00000138028	0	1	0	0	0	1	-0.314511
hg19:X:85158649-85158669:-	SLC41A1|254428	-0.691785	4.17e-06	0.0189207	hsa-mir-361	ENSG00000133065	1	1	0	1	1	1	-0.277838
hg19:17:29887071-29887091:+	KCNV2|169522	-0.691498	4.23e-06	0.0190472	hsa-mir-193a	ENSG00000168263	0	0	1	0	0	1	-0.144395
hg19:19:52196521-52196537:+	TRPV3|162514	-0.69088	4.35e-06	0.0193224	hsa-mir-125a	ENSG00000167723	1	0	1	0	1	0	0.146662
hg19:6:72086707-72086729:-	CD28|940	-0.690476	4.43e-06	0.0194732	hsa-mir-30c-2	ENSG00000178562	1	0	0	1	0	0	-0.472219
hg19:X:73438422-73438444:-	HSPBAP1|79663	-0.690244	4.47e-06	0.0195968	hsa-mir-374b	ENSG00000169087	0	0	1	0	0	1	0.171817
hg19:7:99691438-99691461:-	ZNF512|84450	-0.689873	4.55e-06	0.0197479	hsa-mir-93	ENSG00000243943	0	0	1	1	1	1	-0.146357
hg19:14:100774250-100774271:+	PLEKHN1|84069	-0.689788	4.57e-06	0.0198087	hsa-mir-345	ENSG00000187583	0	0	1	0	0	1	-0.516028
hg19:8:135817163-135817184:-	CMTM3|123920	-0.689636	4.6e-06	0.0198468	hsa-mir-30d	ENSG00000140931	1	0	0	1	0	0	-0.47909
hg19:5:148441935-148441958:-	RPRD2|23248	-0.68951	4.62e-06	0.0199345	hsa-mir-584	ENSG00000163125	0	0	1	0	0	1	-0.0608726
hg19:10:105154058-105154079:-	IGFBP5|3488	-0.689404	4.64e-06	0.0199518	hsa-mir-1307	ENSG00000115461	1	0	1	1	0	1	-0.253243
hg19:5:136983271-136983293:-	PVRL1|5818	-0.689356	4.65e-06	0.0199518	hsa-mir-874	ENSG00000110400	1	0	0	1	0	0	-0.484895
hg19:17:57918633-57918655:+	MYH7B|57644	-0.689356	4.65e-06	0.0199518	hsa-mir-21	ENSG00000078814	0	0	1	0	0	1	-0.446773
hg19:19:50004091-50004111:-	LRP5|4041	-0.689356	4.65e-06	0.0199518	hsa-mir-150	ENSG00000162337	1	0	0	1	0	0	-0.190476
hg19:11:72326146-72326165:-	WDR90|197335	-0.689303	4.67e-06	0.019988	hsa-mir-139	ENSG00000161996	1	1	1	0	0	1	0.00367266
hg19:2:219866370-219866391:-	SLC24A3|57419	-0.689076	4.71e-06	0.0200686	hsa-mir-375	ENSG00000185052	1	0	0	1	0	0	-0.51777
hg19:12:7073318-7073341:+	SERPINE2|5270	-0.688235	4.89e-06	0.0204355	hsa-mir-141	ENSG00000135919	0	1	0	0	1	0	-0.229902
hg19:17:28444149-28444172:+	HLX|3142	-0.688235	4.89e-06	0.0204355	hsa-mir-423	ENSG00000136630	1	0	0	0	1	0	-0.0203578
hg19:1:155165028-155165050:+	NFATC1|4772	-0.687675	5.02e-06	0.0206774	hsa-mir-92b	ENSG00000131196	1	1	1	1	1	1	-0.302495
hg19:7:99691194-99691214:-	MIB2|142678	-0.687333	5.09e-06	0.0208592	hsa-mir-25	ENSG00000197530	0	1	0	0	0	1	-0.0173669
hg19:7:25989542-25989561:-	EXOC7|23265	-0.687013	5.17e-06	0.0210202	hsa-mir-148a	ENSG00000182473	0	1	0	1	0	0	-0.0755272
hg19:17:1617209-1617230:-	CBX1|10951	-0.686603	5.26e-06	0.0212108	hsa-mir-22	ENSG00000108468	1	0	0	1	0	0	-0.0240367
hg19:10:104196276-104196300:+	HSF5|124535	-0.686019	5.4e-06	0.0214742	hsa-mir-146b	ENSG00000176160	1	0	0	1	0	0	-0.0357922
hg19:17:79099688-79099709:-	CAPN2|824	-0.685994	5.4e-06	0.0214742	hsa-mir-338	ENSG00000162909	0	1	0	0	0	1	-0.571086
hg19:5:179442361-179442383:-	SART1|9092	-0.685994	5.4e-06	0.0214742	hsa-mir-340	ENSG00000175467	0	0	1	0	0	1	0.0399776
hg19:21:17911422-17911443:+	LHFPL2|10184	-0.685902	5.42e-06	0.021546	hsa-mir-99a	ENSG00000145685	1	0	0	0	1	0	-0.137515
hg19:3:188406582-188406603:+	MARCH10|162333	-0.68581	5.45e-06	0.0215992	hsa-mir-28	ENSG00000173838	0	0	1	0	0	1	-0.384514
hg19:2:219267380-219267402:+	SIRPG|55423	-0.685714	5.47e-06	0.0215992	hsa-mir-26b	ENSG00000089012	1	0	0	0	1	0	-0.0472199
hg19:2:177015057-177015075:+	MAP2K1|5604	-0.685714	5.47e-06	0.0215992	hsa-mir-10b	ENSG00000169032	0	1	0	1	0	0	0.0454532
hg19:5:58999495-58999515:-	MTUS1|57509	-0.685467	5.53e-06	0.0217339	hsa-mir-582	ENSG00000129422	1	1	1	1	0	1	-0.0330828
hg19:16:69967006-69967026:+	COX18|285521	-0.685166	5.6e-06	0.0218563	hsa-mir-140	ENSG00000163626	1	0	1	0	0	1	-0.136391
hg19:10:104196277-104196296:+	FRAS1|80144	-0.685154	5.61e-06	0.0218563	hsa-mir-146b	ENSG00000138759	0	0	1	1	0	1	-0.254762
hg19:7:25989542-25989561:-	RBM19|9904	-0.685045	5.63e-06	0.0219401	hsa-mir-148a	ENSG00000122965	0	0	1	1	0	1	-0.155701
hg19:17:56408604-56408626:-	LRRC37A3|374819	-0.685018	5.64e-06	0.0219624	hsa-mir-142	ENSG00000176809	0	1	1	0	1	1	-0.338723
hg19:14:100774213-100774234:+	ALOX15|246	-0.68469	5.72e-06	0.0221159	hsa-mir-345	ENSG00000161905	0	0	1	0	0	1	-0.116827
hg19:12:7073318-7073342:+	GUCY1A3|2982	-0.684594	5.75e-06	0.0221159	hsa-mir-141	ENSG00000164116	1	1	1	0	1	1	-0.32396
hg19:10:105154058-105154079:-	ABCA2|20	-0.684081	5.88e-06	0.0224046	hsa-mir-1307	ENSG00000107331	1	0	1	1	0	1	-0.407959
hg19:11:57408725-57408747:+	CD86|942	-0.684081	5.88e-06	0.0224046	hsa-mir-130a	ENSG00000114013	1	0	0	0	0	1	-0.249403
hg19:17:1617207-1617229:-	ADAM11|4185	-0.684034	5.89e-06	0.0224046	hsa-mir-22	ENSG00000073670	1	0	0	1	0	1	-0.28927
hg19:22:22007643-22007665:+	TSC22D1|8848	-0.683753	5.96e-06	0.0225268	hsa-mir-130b	ENSG00000102804	0	0	1	1	1	1	-0.472473
hg19:19:50004089-50004111:-	MZF1|7593	-0.683753	5.96e-06	0.0225268	hsa-mir-150	ENSG00000099326	1	0	0	0	1	0	-0.334456
hg19:12:62997527-62997546:+	NCKAP5|344148	-0.683753	5.96e-06	0.0225268	hsa-let-7i	ENSG00000176771	0	0	1	0	1	1	-0.140174
hg19:17:1617207-1617229:-	CSAD|51380	-0.683473	6.03e-06	0.0226776	hsa-mir-22	ENSG00000139631	1	0	0	1	1	0	-0.300881
hg19:17:57918616-57918634:+	EEF1A1|1915	-0.683348	6.07e-06	0.0227774	hsa-mir-21	ENSG00000156508	0	0	1	1	0	1	-0.130279
hg19:14:101490137-101490158:+	OR2A7|401427	-0.683321	6.07e-06	0.0227981	hsa-mir-299	ENSG00000243896	0	0	1	0	1	1	-0.0492643
hg19:16:67236230-67236252:-	ABL2|27	-0.683193	6.11e-06	0.0228215	hsa-mir-328	ENSG00000143322	1	0	0	0	1	1	-0.423584
hg19:17:1617207-1617229:-	FBXO46|23403	-0.683193	6.11e-06	0.0228215	hsa-mir-22	ENSG00000177051	0	0	1	1	0	0	-0.299567
hg19:16:67236231-67236252:-	KIAA1211|57482	-0.682633	6.26e-06	0.0230708	hsa-mir-328	ENSG00000109265	0	0	1	0	0	1	-0.445045
hg19:5:136983270-136983293:-	FRMD8|83786	-0.682353	6.34e-06	0.023194	hsa-mir-874	ENSG00000126391	1	1	1	0	0	1	-0.408307
hg19:19:52196521-52196541:+	FAM107B|83641	-0.682353	6.34e-06	0.023194	hsa-mir-125a	ENSG00000065809	0	1	0	1	1	1	-0.353999
hg19:14:101351053-101351074:+	EPB41L1|2036	-0.682121	6.4e-06	0.0233117	hsa-mir-136	ENSG00000088367	0	0	1	1	0	1	0.0131429
hg19:17:6921298-6921319:-	FAM92A1|137392	-0.682073	6.41e-06	0.0233117	hsa-mir-497	ENSG00000188343	1	0	1	0	1	1	-0.397328
hg19:10:105154058-105154079:-	TSPYL4|23270	-0.681981	6.44e-06	0.0233804	hsa-mir-1307	ENSG00000187189	0	0	1	0	0	1	-0.208916
hg19:7:129410287-129410305:-	PAK1|5058	-0.681631	6.54e-06	0.0235885	hsa-mir-182	ENSG00000149269	0	0	1	0	0	1	-0.0873852
hg19:2:219267380-219267402:+	PTPN22|26191	-0.681513	6.57e-06	0.0236019	hsa-mir-26b	ENSG00000134242	1	1	1	0	0	1	-0.102907
hg19:7:129414809-129414829:-	SALL1|6299	-0.68142	6.6e-06	0.0236657	hsa-mir-183	ENSG00000103449	0	0	1	1	0	0	-0.364663
hg19:17:7126661-7126684:-	CELF2|10659	-0.681328	6.62e-06	0.0237097	hsa-mir-324	ENSG00000048740	1	0	0	0	1	1	-0.457125
hg19:1:41220086-41220108:+	OLFM3|118427	-0.68102	6.71e-06	0.0238296	hsa-mir-30e	ENSG00000118733	1	0	0	1	0	1	0.077222
hg19:1:207975209-207975232:-	ASB2|51676	-0.680952	6.73e-06	0.0238296	hsa-mir-29c	ENSG00000100628	0	0	1	1	0	0	-0.185483
hg19:16:69967045-69967065:+	SCAND3|114821	-0.680672	6.81e-06	0.0239721	hsa-mir-140	ENSG00000248496	0	0	1	0	0	1	-0.180063
hg19:3:49058104-49058127:-	ZNF219|51222	-0.68064	6.82e-06	0.024	hsa-mir-191	ENSG00000165804	1	0	0	0	1	1	-0.127802
hg19:14:102026663-102026684:-	ZNF610|162963	-0.68058	6.84e-06	0.0240373	hsa-mir-1247	ENSG00000167554	1	0	0	0	1	0	-0.331189
hg19:1:41220044-41220066:+	ANXA2|302	-0.68044	6.88e-06	0.0241289	hsa-mir-30e	ENSG00000182718	0	1	1	0	1	0	-0.601375
hg19:7:25989544-25989563:-	LHX4|89884	-0.680429	6.89e-06	0.0241289	hsa-mir-148a	ENSG00000121454	1	0	1	1	0	1	-0.0409831
hg19:17:1617207-1617230:-	AHI1|54806	-0.680392	6.9e-06	0.0241289	hsa-mir-22	ENSG00000135541	1	0	0	1	1	1	-0.415628
hg19:19:13947102-13947123:-	CLSTN2|64084	-0.680392	6.9e-06	0.0241289	hsa-mir-24-2	ENSG00000158258	1	0	0	0	1	0	-0.312336
hg19:7:129414809-129414829:-	CAND2|23066	-0.6803	6.92e-06	0.0241958	hsa-mir-183	ENSG00000144712	1	0	0	1	0	1	-0.130538
hg19:9:127454798-127454817:+	MAML3|55534	-0.680183	6.96e-06	0.0242731	hsa-mir-181a-2	ENSG00000196782	0	0	1	0	0	1	-0.00489132
hg19:7:130561512-130561530:-	CNR1|1268	-0.68016	6.97e-06	0.0242731	hsa-mir-29a	ENSG00000118432	1	1	1	1	1	1	-0.282753
hg19:11:57408725-57408747:+	JAKMIP1|152789	-0.680112	6.98e-06	0.0242731	hsa-mir-130a	ENSG00000152969	0	0	1	1	0	1	-0.0815186
hg19:16:69967045-69967062:+	PNMA5|114824	-0.680102	6.98e-06	0.0242828	hsa-mir-140	ENSG00000198883	0	0	1	1	0	1	-0.0940626
hg19:5:136983270-136983292:-	COL21A1|81578	-0.680022	7.01e-06	0.0243393	hsa-mir-874	ENSG00000124749	1	1	1	0	0	1	-0.0172121
hg19:1:1103298-1103318:+	NOS1|4842	-0.679847	7.06e-06	0.0244106	hsa-mir-200a	ENSG00000089250	0	1	0	1	0	0	-0.430988
hg19:X:133303412-133303433:-	NPTXR|23467	-0.679437	7.19e-06	0.0246437	hsa-mir-363	ENSG00000221890	1	0	0	1	0	1	-0.132535
hg19:14:101335412-101335434:+	BCL7A|605	-0.679319	7.22e-06	0.0246945	hsa-mir-493	ENSG00000110987	1	0	1	0	1	0	-0.226993
hg19:17:57918637-57918656:+	BTBD11|121551	-0.679272	7.24e-06	0.0246945	hsa-mir-21	ENSG00000151136	0	0	1	0	0	1	-0.680517
hg19:3:188406582-188406603:+	ALOXE3|59344	-0.679272	7.24e-06	0.0246945	hsa-mir-28	ENSG00000179148	1	0	0	0	0	1	-0.458021
hg19:2:207974767-207974788:-	ZNF638|27332	-0.679272	7.24e-06	0.0246945	hsa-mir-2355	ENSG00000075292	0	1	0	1	0	1	-0.0644122
hg19:10:105154057-105154079:-	TSPYL2|64061	-0.678992	7.33e-06	0.0248328	hsa-mir-1307	ENSG00000184205	0	0	1	0	0	1	-0.352536
hg19:14:100576054-100576075:+	SH3GLB2|56904	-0.678455	7.5e-06	0.0250928	hsa-mir-342	ENSG00000148341	1	0	1	0	0	1	-0.064298
hg19:11:57408725-57408747:+	NEK6|10783	-0.678431	7.5e-06	0.0250928	hsa-mir-130a	ENSG00000119408	1	0	0	1	0	0	-0.210711
hg19:17:57918633-57918657:+	TPT1|7178	-0.678344	7.53e-06	0.0251654	hsa-mir-21	ENSG00000133112	1	0	0	0	1	0	-0.216353
hg19:17:1617209-1617230:-	REV1|51455	-0.678199	7.58e-06	0.0252309	hsa-mir-22	ENSG00000135945	1	0	1	0	0	1	-0.187698
hg19:17:79099688-79099709:-	SLC6A14|11254	-0.678151	7.59e-06	0.0252309	hsa-mir-338	ENSG00000087916	0	0	1	0	0	1	-0.488748
hg19:5:159912379-159912400:+	CSRP1|1465	-0.678151	7.59e-06	0.0252309	hsa-mir-146a	ENSG00000159176	1	0	1	1	0	0	-0.410231
hg19:5:136983270-136983292:-	CMIP|80790	-0.677921	7.67e-06	0.0253612	hsa-mir-874	ENSG00000153815	1	1	1	0	0	1	-0.148567
hg19:1:207975837-207975860:-	NDC80|10403	-0.677899	7.68e-06	0.0253612	hsa-mir-29b-2	ENSG00000080986	0	0	1	0	0	1	0.00718309
hg19:11:57408725-57408747:+	PI4K2A|55361	-0.677591	7.78e-06	0.0255338	hsa-mir-130a	ENSG00000155252	1	0	0	0	0	1	-0.433787
hg19:21:17911420-17911442:+	CNTN6|27255	-0.677591	7.78e-06	0.0255338	hsa-mir-99a	ENSG00000134115	1	0	1	0	0	1	-0.269672
hg19:X:49767811-49767832:+	SMS|6611	-0.677559	7.79e-06	0.025566	hsa-mir-532	ENSG00000102172	0	1	0	0	0	1	0.121292
hg19:3:49058104-49058127:-	ZFAND3|60685	-0.677555	7.79e-06	0.0255692	hsa-mir-191	ENSG00000156639	0	1	0	0	0	1	-0.10309
hg19:17:79099689-79099709:-	GALNT1|2589	-0.677358	7.86e-06	0.0256926	hsa-mir-338	ENSG00000141429	1	0	1	0	1	1	-0.448496
hg19:17:57918612-57918634:+	SLC25A27|9481	-0.677311	7.87e-06	0.0256926	hsa-mir-21	ENSG00000153291	1	0	0	0	0	1	-0.384628
hg19:14:101488408-101488428:+	EPB41L1|2036	-0.677031	7.97e-06	0.0258437	hsa-mir-379	ENSG00000088367	1	0	0	1	0	0	-0.0236992
hg19:7:129410284-129410311:-	FMNL3|91010	-0.676751	8.06e-06	0.0259788	hsa-mir-182	ENSG00000161791	0	0	1	1	0	0	-0.273491
hg19:11:57408725-57408747:+	IL2RG|3561	-0.676751	8.06e-06	0.0259788	hsa-mir-130a	ENSG00000147168	0	1	0	0	0	1	-0.244422
hg19:17:1617207-1617229:-	STXBP6|29091	-0.676471	8.16e-06	0.026126	hsa-mir-22	ENSG00000168952	1	0	0	1	0	1	-0.355504
hg19:17:1617209-1617230:-	RCOR3|55758	-0.676378	8.19e-06	0.0262074	hsa-mir-22	ENSG00000117625	1	0	0	0	1	1	-0.291378
hg19:8:10892731-10892753:-	EIF4A1|1973	-0.67619	8.26e-06	0.0262955	hsa-mir-598	ENSG00000161960	1	0	0	0	0	1	-0.50809
hg19:17:6921297-6921319:-	CELSR3|1951	-0.67619	8.26e-06	0.0262955	hsa-mir-497	ENSG00000008300	0	0	1	0	0	1	-0.255976
hg19:9:97847745-97847767:+	NECAP2|55707	-0.67619	8.26e-06	0.0262955	hsa-mir-27b	ENSG00000157191	1	0	0	1	0	1	-0.199421
hg19:X:45605651-45605671:-	MADD|8567	-0.6761	8.29e-06	0.0263793	hsa-mir-221	ENSG00000110514	0	1	1	0	1	1	-0.169148
hg19:16:14397874-14397894:+	CTSB|1508	-0.67596	8.34e-06	0.0264552	hsa-mir-193b	ENSG00000164733	1	0	0	1	1	0	-0.12984
hg19:19:52196521-52196541:+	IRAK1|3654	-0.67591	8.35e-06	0.0264552	hsa-mir-125a	ENSG00000184216	1	0	1	1	0	1	-0.49891
hg19:8:41518002-41518023:-	C3orf72|401089	-0.675764	8.41e-06	0.0265849	hsa-mir-486	ENSG00000206262	1	0	0	0	1	0	-0.33378
hg19:17:1617245-1617268:-	FREM1|158326	-0.675678	8.44e-06	0.0266125	hsa-mir-22	ENSG00000164946	0	0	1	0	1	1	0.0898459
hg19:1:9211795-9211816:-	TNS1|7145	-0.67563	8.45e-06	0.0266125	hsa-mir-34a	ENSG00000079308	0	1	1	0	0	1	-0.454169
hg19:3:188406622-188406644:+	RYR1|6261	-0.67563	8.45e-06	0.0266125	hsa-mir-28	ENSG00000196218	1	0	1	0	0	1	-0.331663
hg19:14:65937871-65937891:+	OBSL1|23363	-0.67563	8.45e-06	0.0266125	hsa-mir-625	ENSG00000124006	0	0	1	1	0	1	-0.273362
hg19:5:148810262-148810284:+	HINFP|25988	-0.67563	8.45e-06	0.0266125	hsa-mir-145	ENSG00000172273	0	1	0	0	1	0	-0.271717
hg19:17:6921297-6921319:-	ACVR2A|92	-0.67563	8.45e-06	0.0266125	hsa-mir-497	ENSG00000121989	1	0	0	1	0	0	-0.170977
hg19:7:129410287-129410310:-	ANXA6|309	-0.675397	8.54e-06	0.0267576	hsa-mir-182	ENSG00000197043	0	0	1	0	0	1	0.021705
hg19:6:72113298-72113321:-	BZW1|9689	-0.675386	8.54e-06	0.0267576	hsa-mir-30a	ENSG00000082153	0	1	0	0	0	1	0.0302613
hg19:16:67236230-67236252:-	PRR5L|79899	-0.67535	8.55e-06	0.0267576	hsa-mir-328	ENSG00000135362	0	1	0	0	0	1	-0.441135
hg19:8:41517961-41517982:-	OR2B6|26212	-0.675332	8.56e-06	0.0267741	hsa-mir-486	ENSG00000124657	0	0	1	0	0	1	-0.49096
hg19:7:150935535-150935560:+	SHANK3|85358	-0.675158	8.62e-06	0.0269193	hsa-mir-671	ENSG00000251322	0	0	1	0	0	1	-0.0481406
hg19:17:1617207-1617229:-	AKAP8L|26993	-0.67507	8.66e-06	0.0269193	hsa-mir-22	ENSG00000011243	1	0	1	0	1	0	-0.372853
hg19:7:130135967-130135989:+	DCLK1|9201	-0.67507	8.66e-06	0.0269193	hsa-mir-335	ENSG00000133083	1	0	0	0	0	1	-0.344474
hg19:5:148810225-148810247:+	TMOD4|29765	-0.674898	8.72e-06	0.0270835	hsa-mir-145	ENSG00000163157	1	0	1	0	0	1	-0.0784502
hg19:16:67236231-67236252:-	VCAN|1462	-0.67479	8.76e-06	0.0270885	hsa-mir-328	ENSG00000038427	0	0	1	0	0	1	-0.527284
hg19:1:155165028-155165047:+	ACACB|32	-0.67479	8.76e-06	0.0270885	hsa-mir-92b	ENSG00000076555	0	0	1	0	0	1	-0.161516
hg19:17:57918672-57918691:+	AHI1|54806	-0.67479	8.76e-06	0.0270885	hsa-mir-21	ENSG00000135541	1	0	1	0	0	1	-0.144241
hg19:17:28444149-28444172:+	CLEC11A|6320	-0.67479	8.76e-06	0.0270885	hsa-mir-423	ENSG00000105472	0	0	1	0	0	1	-0.0728186
hg19:7:99691194-99691214:-	P4HTM|54681	-0.674683	8.8e-06	0.027175	hsa-mir-25	ENSG00000178467	0	0	1	0	0	1	-0.0369968
hg19:2:207974765-207974788:-	FCAMR|83953	-0.674412	8.9e-06	0.0273366	hsa-mir-2355	ENSG00000162897	1	0	0	1	0	1	0.0955836
hg19:1:207975249-207975269:-	TRA2B|6434	-0.674277	8.95e-06	0.0273918	hsa-mir-29c	ENSG00000136527	1	0	0	1	0	0	-0.0317746
hg19:X:133675396-133675416:-	ATG4A|115201	-0.67423	8.97e-06	0.0273918	hsa-mir-542	ENSG00000101844	1	1	1	1	0	0	-0.0213423
hg19:19:52196521-52196542:+	ALDH1L2|160428	-0.673997	9.06e-06	0.0275411	hsa-mir-125a	ENSG00000136010	1	0	0	1	0	1	-0.44506
hg19:X:45606480-45606503:-	LRRN4|164312	-0.673951	9.07e-06	0.0275411	hsa-mir-222	ENSG00000125872	0	0	1	0	0	1	-0.104871
hg19:9:97847745-97847767:+	LPCAT1|79888	-0.67395	9.08e-06	0.0275411	hsa-mir-27b	ENSG00000153395	0	0	1	1	0	0	-0.420971
hg19:1:155165028-155165047:+	DAAM2|23500	-0.67395	9.08e-06	0.0275411	hsa-mir-92b	ENSG00000146122	0	0	1	0	0	1	-0.359793
hg19:10:105154058-105154080:-	ANKH|56172	-0.67395	9.08e-06	0.0275411	hsa-mir-1307	ENSG00000154122	1	0	0	1	0	0	-0.344627
hg19:10:104196277-104196297:+	C14orf132|56967	-0.67395	9.08e-06	0.0275411	hsa-mir-146b	ENSG00000227051	0	1	0	0	1	0	-0.335563
hg19:17:46657270-46657289:-	TTC5|91875	-0.673669	9.18e-06	0.0276758	hsa-mir-10a	ENSG00000136319	0	1	0	1	0	0	-0.306807
hg19:19:52196521-52196544:+	DOCK4|9732	-0.673669	9.18e-06	0.0276758	hsa-mir-125a	ENSG00000128512	0	0	1	0	0	1	-0.214933
hg19:X:45606441-45606462:-	CDON|50937	-0.673389	9.29e-06	0.0278457	hsa-mir-222	ENSG00000064309	0	0	1	0	0	1	-0.425776
hg19:8:10892731-10892753:-	LFNG|3955	-0.673109	9.4e-06	0.0280056	hsa-mir-598	ENSG00000106003	1	0	0	0	0	1	-0.466983
hg19:6:72086709-72086729:-	EMR1|2015	-0.673109	9.4e-06	0.0280056	hsa-mir-30c-2	ENSG00000174837	1	0	1	0	0	1	-0.355823
hg19:X:49768162-49768182:+	ANK1|286	-0.673082	9.41e-06	0.0280365	hsa-mir-188	ENSG00000029534	0	0	1	1	0	1	-0.0382052
hg19:3:188406622-188406643:+	ILDR1|286676	-0.672829	9.51e-06	0.0281647	hsa-mir-28	ENSG00000145103	0	0	1	0	1	0	-0.288237
hg19:17:57918671-57918693:+	CGGBP1|8545	-0.672792	9.53e-06	0.028202	hsa-mir-21	ENSG00000163320	1	0	0	1	0	0	-0.124571
hg19:X:45605610-45605630:-	ACACB|32	-0.672549	9.62e-06	0.0283267	hsa-mir-221	ENSG00000076555	0	0	1	1	1	1	-0.482126
hg19:3:188406582-188406603:+	SHROOM1|134549	-0.672549	9.62e-06	0.0283267	hsa-mir-28	ENSG00000164403	1	0	0	0	1	1	-0.365739
hg19:14:101506606-101506626:+	EPB41L1|2036	-0.672549	9.62e-06	0.0283267	hsa-mir-654	ENSG00000088367	1	0	0	0	0	1	-0.0306492
hg19:5:136983330-136983351:-	MZF1|7593	-0.672478	9.65e-06	0.0283961	hsa-mir-874	ENSG00000099326	1	0	1	0	1	0	0.0216513
hg19:17:46657265-46657287:-	RIOK2|55781	-0.672459	9.66e-06	0.0284033	hsa-mir-10a	ENSG00000058729	0	0	1	1	0	1	-0.0137998
hg19:17:29887071-29887091:+	DNAJC5G|285126	-0.672312	9.72e-06	0.0285052	hsa-mir-193a	ENSG00000163793	1	0	0	0	1	0	-0.0472459
hg19:X:133675398-133675416:-	CLEC16A|23274	-0.672046	9.83e-06	0.0286553	hsa-mir-542	ENSG00000038532	0	0	1	1	0	1	-0.0853119
hg19:14:101340890-101340912:+	ZNF274|10782	-0.671989	9.85e-06	0.0286553	hsa-mir-337	ENSG00000171606	0	0	1	0	1	0	-0.316332
hg19:1:155165029-155165050:+	MUC6|4588	-0.671904	9.89e-06	0.0287319	hsa-mir-92b	ENSG00000184956	0	0	1	0	0	1	-0.0884918
hg19:17:1617209-1617229:-	STK31|56164	-0.671805	9.93e-06	0.028815	hsa-mir-22	ENSG00000196335	0	0	1	0	0	1	-0.0587629
hg19:X:45605610-45605630:-	CDON|50937	-0.671709	9.97e-06	0.028815	hsa-mir-221	ENSG00000064309	1	0	1	0	1	1	-0.456345
hg19:5:148810223-148810244:+	HMGCS2|3158	-0.671573	1e-05	0.0289344	hsa-mir-145	ENSG00000134240	0	0	1	0	0	1	-0.156486
hg19:17:57918616-57918634:+	LSM14A|26065	-0.671476	1.01e-05	0.028988	hsa-mir-21	ENSG00000257103	1	0	0	0	0	1	-0.136105
hg19:X:49767773-49767794:+	ITGA2B|3674	-0.671429	1.01e-05	0.028988	hsa-mir-532	ENSG00000005961	0	1	1	0	0	1	-0.180359
hg19:14:101513666-101513689:+	PDCD4|27250	-0.671154	1.02e-05	0.0291498	hsa-mir-539	ENSG00000150593	1	0	1	1	0	1	-0.140056
hg19:11:72326112-72326133:-	HOXD10|3236	-0.671152	1.02e-05	0.0291498	hsa-mir-139	ENSG00000128710	0	0	1	1	1	0	-0.42288
hg19:1:9211796-9211816:-	LDB3|11155	-0.671148	1.02e-05	0.0291498	hsa-mir-34a	ENSG00000122367	1	0	1	0	0	1	-0.300864
hg19:17:28444149-28444171:+	LRRC32|2615	-0.671148	1.02e-05	0.0291498	hsa-mir-423	ENSG00000137507	1	0	0	1	0	1	-0.212443
hg19:X:45606441-45606462:-	KIF13A|63971	-0.671148	1.02e-05	0.0291498	hsa-mir-222	ENSG00000137177	1	0	1	0	0	1	-0.122987
hg19:14:101512305-101512326:+	EPB41L1|2036	-0.671148	1.02e-05	0.0291498	hsa-mir-381	ENSG00000088367	1	1	0	1	0	0	-0.0328629
hg19:17:1953223-1953243:-	BTBD16|118663	-0.671024	1.03e-05	0.0292729	hsa-mir-132	ENSG00000138152	0	0	1	0	0	1	-0.168472
hg19:5:136983271-136983293:-	MDFI|4188	-0.670868	1.03e-05	0.0293042	hsa-mir-874	ENSG00000112559	0	0	1	0	0	1	-0.597178
hg19:5:159912379-159912400:+	ZNF219|51222	-0.670868	1.03e-05	0.0293042	hsa-mir-146a	ENSG00000165804	1	0	0	0	1	0	-0.430273
hg19:X:49773090-49773113:+	SAFB2|9667	-0.670868	1.03e-05	0.0293042	hsa-mir-500a	ENSG00000130254	1	0	0	0	0	1	-0.233534
hg19:12:7073276-7073296:+	DNM1|1759	-0.670868	1.03e-05	0.0293042	hsa-mir-141	ENSG00000106976	1	0	0	0	0	1	-0.187486
hg19:19:52196521-52196537:+	MAN2A1|4124	-0.670144	1.06e-05	0.0297974	hsa-mir-125a	ENSG00000112893	0	0	1	0	0	1	-0.13607
hg19:X:45605609-45605630:-	RAB23|51715	-0.670028	1.07e-05	0.0298204	hsa-mir-221	ENSG00000112210	1	0	0	1	0	1	-0.143657
hg19:7:130561506-130561530:-	TAF15|8148	-0.670028	1.07e-05	0.0298204	hsa-mir-29a	ENSG00000172660	0	0	1	0	1	0	-0.126425
hg19:13:50570564-50570586:-	PCSK7|9159	-0.669767	1.08e-05	0.0299731	hsa-mir-3613	ENSG00000160613	1	0	1	1	0	1	0.0904618
hg19:14:101506606-101506626:+	FIP1L1|81608	-0.669748	1.08e-05	0.0299731	hsa-mir-654	ENSG00000145216	1	0	0	0	0	1	-0.212189
hg19:7:129414807-129414829:-	THRA|7067	-0.669748	1.08e-05	0.0299731	hsa-mir-183	ENSG00000126351	1	0	0	1	0	0	-0.114628
hg19:7:99691626-99691647:-	ABCA3|21	-0.669748	1.08e-05	0.0299731	hsa-mir-106b	ENSG00000167972	0	1	0	0	0	1	-0.0459393
hg19:17:46114540-46114561:-	CLCN2|1181	-0.669748	1.08e-05	0.0299731	hsa-mir-152	ENSG00000114859	0	1	1	0	0	1	0.0671416
hg19:7:130561507-130561530:-	SYNPO2|171024	-0.669468	1.09e-05	0.0301389	hsa-mir-29a	ENSG00000172403	1	0	1	1	0	1	-0.229746
hg19:22:46509571-46509592:+	SLC11A1|6556	-0.669468	1.09e-05	0.0301389	hsa-let-7b	ENSG00000018280	1	0	0	0	0	1	-0.145564
hg19:6:72086707-72086729:-	EHBP1L1|254102	-0.669188	1.11e-05	0.0303181	hsa-mir-30c-2	ENSG00000173442	0	0	1	0	0	1	-0.60733
hg19:1:26881066-26881087:+	NAV1|89796	-0.669188	1.11e-05	0.0303181	hsa-mir-1976	ENSG00000134369	1	0	0	1	0	0	-0.244783
hg19:17:57918616-57918634:+	PRTG|283659	-0.669095	1.11e-05	0.0304037	hsa-mir-21	ENSG00000166450	0	0	1	0	0	1	-0.171355
hg19:10:105154058-105154079:-	NGFR|4804	-0.668954	1.12e-05	0.0305057	hsa-mir-1307	ENSG00000064300	0	1	1	0	0	1	-0.393087
hg19:10:105154058-105154079:-	DCLK2|166614	-0.668674	1.13e-05	0.0306755	hsa-mir-1307	ENSG00000170390	0	0	1	0	1	1	-0.222051
hg19:7:5535504-5535526:-	TIMP3|7078	-0.668627	1.13e-05	0.0306755	hsa-mir-589	ENSG00000100234	1	0	0	1	0	0	-0.195751
hg19:14:101340890-101340911:+	ETV1|2115	-0.668584	1.13e-05	0.0307215	hsa-mir-337	ENSG00000006468	1	0	1	0	0	1	0.0079356
hg19:17:1617207-1617230:-	LCN6|158062	-0.668347	1.15e-05	0.0308572	hsa-mir-22	ENSG00000267206	0	1	0	0	0	1	-0.482183
hg19:10:104196276-104196298:+	SDK2|54549	-0.668347	1.15e-05	0.0308572	hsa-mir-146b	ENSG00000069188	0	0	1	0	0	1	-0.418073
hg19:13:50623305-50623325:-	MFHAS1|9258	-0.668347	1.15e-05	0.0308572	hsa-mir-15a	ENSG00000147324	1	0	0	0	0	1	0.00401677
hg19:5:148808543-148808561:+	SEPT3|55964	-0.668304	1.15e-05	0.0309025	hsa-mir-143	ENSG00000100167	0	1	1	1	0	1	0.00713532
hg19:11:72326148-72326169:-	CEP78|84131	-0.668114	1.16e-05	0.0310196	hsa-mir-139	ENSG00000148019	1	0	0	0	1	1	-0.0268764
hg19:7:129410287-129410305:-	CALM3|808	-0.667883	1.17e-05	0.0311773	hsa-mir-182	ENSG00000160014	0	1	0	1	0	0	-0.144487
hg19:19:52196521-52196541:+	NEK6|10783	-0.667787	1.17e-05	0.0311773	hsa-mir-125a	ENSG00000119408	1	0	0	1	1	1	-0.407693
hg19:3:188406623-188406644:+	PPFIA4|8497	-0.667787	1.17e-05	0.0311773	hsa-mir-28	ENSG00000143847	0	1	1	1	1	1	-0.338508
hg19:X:133680673-133680695:-	GOLGA3|2802	-0.667787	1.17e-05	0.0311773	hsa-mir-424	ENSG00000090615	0	0	1	1	0	1	-0.273711
hg19:1:41220085-41220107:+	GNL2|29889	-0.667741	1.17e-05	0.031229	hsa-mir-30e	ENSG00000134697	0	0	1	0	0	1	-0.191895
hg19:6:72086667-72086689:-	LIMD2|80774	-0.667507	1.19e-05	0.0313781	hsa-mir-30c-2	ENSG00000136490	0	1	0	1	0	0	-0.554003
hg19:9:97847787-97847809:+	PDE3B|5140	-0.667507	1.19e-05	0.0313781	hsa-mir-27b	ENSG00000261923	0	0	1	0	0	1	-0.356314
hg19:11:57408724-57408747:+	DLX2|1746	-0.667462	1.19e-05	0.0314219	hsa-mir-130a	ENSG00000115844	0	1	0	1	0	0	0.0268424
hg19:5:148810224-148810246:+	MST1R|4486	-0.667227	1.2e-05	0.0315214	hsa-mir-145	ENSG00000164078	0	0	1	0	0	1	-0.371225
hg19:17:1617207-1617229:-	SMARCC2|6601	-0.666947	1.21e-05	0.0316796	hsa-mir-22	ENSG00000139613	1	0	1	0	0	1	-0.393915
hg19:1:207975246-207975268:-	ARPC5|10092	-0.666947	1.21e-05	0.0316796	hsa-mir-29c	ENSG00000162704	1	0	0	1	0	0	-0.312052
hg19:14:101506606-101506628:+	TTC28|23331	-0.666904	1.22e-05	0.0317271	hsa-mir-654	ENSG00000100154	1	0	1	0	0	1	0.0713775
hg19:9:131007028-131007047:-	ZNF416|55659	-0.66676	1.22e-05	0.0318669	hsa-mir-199b	ENSG00000083817	0	0	1	0	0	1	-0.323106
hg19:9:97847745-97847769:+	PCDH11X|27328	-0.666667	1.23e-05	0.0318669	hsa-mir-27b	ENSG00000102290	1	0	0	0	0	1	0.0533717
hg19:1:155165028-155165047:+	KCTD7|154881	-0.666667	1.23e-05	0.0318669	hsa-mir-92b	ENSG00000243335	1	0	0	1	0	1	-0.175329
hg19:19:52196522-52196545:+	AFF3|3899	-0.666623	1.23e-05	0.0319141	hsa-mir-125a	ENSG00000144218	1	0	1	0	1	1	-0.0421643
hg19:3:49057630-49057655:-	ATP2A1|487	-0.666573	1.23e-05	0.0319509	hsa-mir-425	ENSG00000196296	1	0	1	1	0	0	-0.137404
hg19:1:110141562-110141582:+	RAB11FIP3|9727	-0.666573	1.23e-05	0.0319509	hsa-mir-197	ENSG00000090565	1	0	0	0	1	0	-0.103159
hg19:1:110141562-110141586:+	FCAMR|83953	-0.666526	1.23e-05	0.0320036	hsa-mir-197	ENSG00000162897	1	0	1	1	0	1	-0.0934424
hg19:3:49058104-49058127:-	LMO4|8543	-0.6662	1.25e-05	0.0321803	hsa-mir-191	ENSG00000143013	1	0	0	0	1	0	-0.0242345
hg19:5:136983271-136983293:-	PLAUR|5329	-0.666106	1.26e-05	0.0321803	hsa-mir-874	ENSG00000011422	1	0	0	0	0	1	-0.532641
hg19:17:1953223-1953245:-	TTC39A|22996	-0.666106	1.26e-05	0.0321803	hsa-mir-132	ENSG00000085831	1	0	0	1	0	0	-0.243749
hg19:7:129414805-129414829:-	PLA2G3|50487	-0.666106	1.26e-05	0.0321803	hsa-mir-183	ENSG00000100078	1	0	0	1	0	0	-0.17289
hg19:X:45606480-45606503:-	SPNS1|83985	-0.666106	1.26e-05	0.0321803	hsa-mir-222	ENSG00000169682	0	1	1	0	1	0	-0.157255
hg19:17:28444148-28444170:+	WT1|7490	-0.66606	1.26e-05	0.0322347	hsa-mir-423	ENSG00000184937	0	0	1	0	1	0	-0.124835
hg19:12:54731023-54731046:+	FBLIM1|54751	-0.665873	1.27e-05	0.0323474	hsa-mir-148b	ENSG00000162458	0	0	1	0	0	1	-0.0904177
hg19:3:188406623-188406645:+	CIRBP|1153	-0.665826	1.27e-05	0.0323474	hsa-mir-28	ENSG00000099622	0	1	0	0	1	0	-0.369733
hg19:1:110141562-110141583:+	PLIN1|5346	-0.665826	1.27e-05	0.0323474	hsa-mir-197	ENSG00000166819	0	0	1	0	0	1	-0.240658
hg19:X:45605610-45605630:-	SLC1A2|6506	-0.665546	1.29e-05	0.032523	hsa-mir-221	ENSG00000110436	1	0	0	1	0	0	-0.350668
hg19:12:7073318-7073342:+	CD93|22918	-0.665546	1.29e-05	0.032523	hsa-mir-141	ENSG00000125810	1	0	0	1	0	0	-0.267912
hg19:3:188406623-188406644:+	SNX5|27131	-0.665266	1.3e-05	0.0327046	hsa-mir-28	ENSG00000089006	0	0	1	0	0	1	-0.422443
hg19:14:101506606-101506626:+	ILDR1|286676	-0.665266	1.3e-05	0.0327046	hsa-mir-654	ENSG00000145103	0	0	1	0	0	1	-0.361526
hg19:17:28444149-28444172:+	PITPNC1|26207	-0.665266	1.3e-05	0.0327046	hsa-mir-423	ENSG00000154217	1	0	0	0	1	0	-0.115583
hg19:19:50004093-50004113:-	DDX3Y|8653	-0.665213	1.3e-05	0.0327608	hsa-mir-150	ENSG00000067048	0	1	0	1	0	1	-0.228644
hg19:3:188406623-188406644:+	RBMX|27316	-0.664986	1.31e-05	0.0328673	hsa-mir-28	ENSG00000147274	1	0	1	0	0	1	-0.365768
hg19:17:1953225-1953245:-	C14orf159|80017	-0.664937	1.32e-05	0.0329179	hsa-mir-132	ENSG00000133943	0	1	0	0	0	1	-0.251088
hg19:6:72113257-72113276:-	GPR64|10149	-0.664937	1.32e-05	0.0329179	hsa-mir-30a	ENSG00000173698	0	0	1	0	0	1	-0.246317
hg19:17:57918672-57918691:+	DZIP3|9666	-0.664706	1.33e-05	0.033052	hsa-mir-21	ENSG00000198919	1	0	1	0	1	1	-0.45464
hg19:9:97847787-97847808:+	PLAC8|51316	-0.664612	1.34e-05	0.0331346	hsa-mir-27b	ENSG00000145287	1	0	0	0	0	1	-0.273639
hg19:11:57408726-57408747:+	OLFM3|118427	-0.664577	1.34e-05	0.0331734	hsa-mir-130a	ENSG00000118733	1	0	1	1	0	0	0.0368207
hg19:7:130561546-130561567:-	ZBTB32|27033	-0.664517	1.34e-05	0.033221	hsa-mir-29a	ENSG00000011590	1	0	0	0	0	1	0.0995694
hg19:14:101521801-101521823:+	SCAMP4|113178	-0.664471	1.34e-05	0.033221	hsa-mir-485	ENSG00000227500	1	0	0	1	0	0	-0.068895
hg19:17:57918633-57918656:+	RERE|473	-0.664426	1.35e-05	0.033221	hsa-mir-21	ENSG00000142599	1	0	1	0	1	0	-0.415521
hg19:X:49767774-49767796:+	CNTN2|6900	-0.66439	1.35e-05	0.0332587	hsa-mir-532	ENSG00000184144	1	0	0	1	0	0	0.0709591
hg19:17:28444149-28444172:+	ARID5A|10865	-0.664146	1.36e-05	0.0334131	hsa-mir-423	ENSG00000196843	1	0	0	0	0	1	-0.409052
hg19:1:9211795-9211816:-	ST6GAL2|84620	-0.664146	1.36e-05	0.0334131	hsa-mir-34a	ENSG00000144057	1	0	1	1	0	1	-0.317042
hg19:10:105154057-105154079:-	TENC1|23371	-0.664146	1.36e-05	0.0334131	hsa-mir-1307	ENSG00000111077	1	1	1	0	0	1	-0.310013
hg19:X:45606441-45606462:-	NFE2L1|4779	-0.664146	1.36e-05	0.0334131	hsa-mir-222	ENSG00000082641	0	0	1	1	0	0	-0.265442
hg19:X:133675397-133675417:-	GOLGA3|2802	-0.664146	1.36e-05	0.0334131	hsa-mir-542	ENSG00000090615	0	0	1	1	0	1	-0.257756
hg19:X:85158648-85158669:-	ARHGEF17|9828	-0.664146	1.36e-05	0.0334131	hsa-mir-361	ENSG00000110237	1	0	1	1	1	1	-0.220168
hg19:7:5535504-5535526:-	BTNL9|153579	-0.664146	1.36e-05	0.0334131	hsa-mir-589	ENSG00000165810	1	0	0	0	0	1	-0.19658
hg19:12:7073318-7073340:+	C6|729	-0.664051	1.37e-05	0.0335084	hsa-mir-141	ENSG00000039537	0	0	1	0	0	1	-0.324394
hg19:17:57918615-57918633:+	CTSB|1508	-0.663916	1.37e-05	0.0335946	hsa-mir-21	ENSG00000164733	0	0	1	1	1	1	0.0170264
hg19:22:46509574-46509592:+	GCNT7|140687	-0.663884	1.38e-05	0.0335946	hsa-let-7b	ENSG00000124091	0	1	0	0	0	1	-0.184594
hg19:5:58999459-58999478:-	ZNF286B|729288	-0.663866	1.38e-05	0.0335946	hsa-mir-582	ENSG00000249459	1	0	0	1	0	0	-0.0918272
hg19:5:159912378-159912401:+	MAPK10|5602	-0.663674	1.39e-05	0.0337837	hsa-mir-146a	ENSG00000109339	1	0	0	0	1	1	-0.240508
hg19:14:65937870-65937891:+	TDRD12|91646	-0.663628	1.39e-05	0.0337837	hsa-mir-625	ENSG00000173809	1	0	0	0	0	1	-0.23871
hg19:17:1617207-1617229:-	C9orf3|84909	-0.663585	1.39e-05	0.0337837	hsa-mir-22	ENSG00000148120	0	0	1	1	1	0	-0.545318
hg19:12:7073276-7073298:+	AKAP12|9590	-0.663585	1.39e-05	0.0337837	hsa-mir-141	ENSG00000131016	0	0	1	0	0	1	-0.292988
hg19:19:52196521-52196544:+	NCALD|83988	-0.663585	1.39e-05	0.0337837	hsa-mir-125a	ENSG00000104490	0	0	1	1	1	0	-0.156525
hg19:X:85158689-85158708:-	CCDC33|80125	-0.663395	1.4e-05	0.0339563	hsa-mir-361	ENSG00000140481	0	0	1	1	0	1	0.084132
hg19:1:41220086-41220108:+	C6orf118|168090	-0.663084	1.42e-05	0.03414	hsa-mir-30e	ENSG00000112539	0	0	1	1	0	0	-0.0283087
hg19:9:97847547-97847568:+	DCTN5|84516	-0.663072	1.42e-05	0.03414	hsa-mir-23b	ENSG00000166847	1	0	0	0	0	1	-0.306264
hg19:11:64658631-64658653:-	SH3PXD2B|285590	-0.663072	1.42e-05	0.03414	hsa-mir-192	ENSG00000174705	1	0	0	1	0	0	-0.134328
hg19:17:28444149-28444171:+	TGFB3|7043	-0.663025	1.42e-05	0.03414	hsa-mir-423	ENSG00000119699	1	1	1	0	0	1	-0.37454
hg19:5:148808540-148808557:+	PCSK2|5126	-0.662922	1.43e-05	0.0342415	hsa-mir-143	ENSG00000125851	0	0	1	1	1	1	-0.0980194
hg19:17:1617214-1617230:-	EPS8|2059	-0.662838	1.43e-05	0.0343388	hsa-mir-22	ENSG00000151491	1	0	1	0	1	1	-0.259035
hg19:17:57918612-57918634:+	OBSCN|84033	-0.662745	1.44e-05	0.0343388	hsa-mir-21	ENSG00000154358	0	0	1	0	1	1	-0.309569
hg19:5:58999459-58999478:-	SLAIN1|122060	-0.662745	1.44e-05	0.0343388	hsa-mir-582	ENSG00000139737	0	1	0	1	0	0	-0.135674
hg19:17:28444149-28444171:+	LEPRE1|64175	-0.662745	1.44e-05	0.0343388	hsa-mir-423	ENSG00000117385	1	0	0	1	0	1	-0.104746
hg19:14:102026663-102026684:-	ZNF571|51276	-0.662651	1.45e-05	0.0344313	hsa-mir-1247	ENSG00000180479	1	0	0	0	1	0	-0.404716
hg19:17:57918616-57918634:+	NACA|4666	-0.662651	1.45e-05	0.0344313	hsa-mir-21	ENSG00000196531	0	0	1	0	1	1	-0.228496
hg19:7:129414811-129414829:-	PRTG|283659	-0.662558	1.45e-05	0.034531	hsa-mir-183	ENSG00000166450	1	0	0	0	0	1	-0.0477605
hg19:17:57918638-57918658:+	AGER|177	-0.662557	1.45e-05	0.034531	hsa-mir-21	ENSG00000204305	1	0	0	0	0	1	0.0135042
hg19:9:97847745-97847767:+	AMICA1|120425	-0.662465	1.46e-05	0.034531	hsa-mir-27b	ENSG00000160593	0	1	0	0	0	1	-0.301684
hg19:9:97847745-97847767:+	SELPLG|6404	-0.662465	1.46e-05	0.034531	hsa-mir-27b	ENSG00000110876	1	0	0	0	0	1	-0.229091
hg19:5:148808540-148808561:+	MPP3|4356	-0.662465	1.46e-05	0.034531	hsa-mir-143	ENSG00000161647	1	1	1	0	0	1	-0.215685
hg19:21:17912157-17912179:+	SLC5A6|8884	-0.662465	1.46e-05	0.034531	hsa-let-7c	ENSG00000138074	1	0	0	1	0	1	-0.196754
hg19:7:150935535-150935558:+	PIWIL1|9271	-0.662418	1.46e-05	0.0345795	hsa-mir-671	ENSG00000125207	0	1	0	1	0	0	0.111219
hg19:11:72326146-72326165:-	LPIN3|64900	-0.66241	1.46e-05	0.0345831	hsa-mir-139	ENSG00000132793	1	0	1	0	0	1	0.0618296
hg19:3:160122395-160122413:+	ADD1|118	-0.66237	1.46e-05	0.0346168	hsa-mir-15b	ENSG00000087274	0	0	1	0	0	1	0.0478737
hg19:5:159912379-159912403:+	RRBP1|6238	-0.662231	1.47e-05	0.0346894	hsa-mir-146a	ENSG00000125844	1	0	1	1	0	1	-0.14788
hg19:10:105154058-105154079:-	CEP68|23177	-0.662091	1.48e-05	0.0347772	hsa-mir-1307	ENSG00000011523	1	1	1	0	1	1	-0.0998747
hg19:17:56408604-56408626:-	USP11|8237	-0.662044	1.48e-05	0.0348285	hsa-mir-142	ENSG00000102226	0	0	1	0	0	1	-0.289666
hg19:1:207975249-207975269:-	CRISPLD1|83690	-0.661951	1.49e-05	0.0348467	hsa-mir-29c	ENSG00000121005	0	0	1	1	0	0	-0.162683
hg19:9:73424947-73424969:-	SDC3|9672	-0.661905	1.49e-05	0.0348467	hsa-mir-204	ENSG00000162512	1	0	0	1	1	1	-0.362315
hg19:17:1617207-1617230:-	BBS5|129880	-0.661905	1.49e-05	0.0348467	hsa-mir-22	ENSG00000163093	0	1	0	0	1	1	-0.340084
hg19:14:102026699-102026721:-	ZNF747|65988	-0.661809	1.5e-05	0.0349485	hsa-mir-1247	ENSG00000169955	1	0	1	0	0	1	-0.267075
hg19:19:13985540-13985561:+	SIRPB2|284759	-0.661713	1.5e-05	0.0350229	hsa-mir-181c	ENSG00000196209	1	0	0	0	1	1	-0.120902
hg19:14:102026663-102026684:-	EPB41L1|2036	-0.661671	1.5e-05	0.0350229	hsa-mir-1247	ENSG00000088367	1	1	1	0	1	1	-0.0566183
hg19:5:148810262-148810284:+	ZNF114|163071	-0.661625	1.51e-05	0.0350229	hsa-mir-145	ENSG00000178150	0	0	1	1	1	1	-0.30151
hg19:17:57918635-57918657:+	SLCO1C1|53919	-0.661391	1.52e-05	0.0352008	hsa-mir-21	ENSG00000139155	1	0	1	1	0	0	-0.357543
hg19:7:129410291-129410311:-	ACOX2|8309	-0.661345	1.52e-05	0.0352008	hsa-mir-182	ENSG00000168306	0	0	1	0	0	1	-0.166966
hg19:X:45605652-45605671:-	CABIN1|23523	-0.661289	1.53e-05	0.0352572	hsa-mir-221	ENSG00000099991	0	0	1	0	0	1	-0.279207
hg19:14:101531651-101531674:+	BCL7A|605	-0.661107	1.54e-05	0.0353543	hsa-mir-409	ENSG00000110987	1	1	0	0	1	0	-0.17734
hg19:6:72113297-72113319:-	MARCKS|4082	-0.661064	1.54e-05	0.0353543	hsa-mir-30a	ENSG00000155130	1	0	0	1	0	0	-0.399279
hg19:10:105154058-105154079:-	LGR6|59352	-0.660831	1.56e-05	0.0355192	hsa-mir-1307	ENSG00000133067	1	0	1	0	1	0	-0.208738
hg19:9:97847550-97847568:+	HEMK1|51409	-0.660625	1.57e-05	0.0356845	hsa-mir-23b	ENSG00000114735	1	0	0	0	1	0	0.0492294
hg19:3:188406623-188406645:+	AP3B2|8120	-0.660504	1.58e-05	0.0357214	hsa-mir-28	ENSG00000103723	1	0	0	0	0	1	-0.484565
hg19:8:22102488-22102511:-	PAG1|55824	-0.660504	1.58e-05	0.0357214	hsa-mir-320a	ENSG00000076641	0	1	0	1	0	0	-0.159745
hg19:X:151128150-151128170:-	PCSK2|5126	-0.660448	1.58e-05	0.0357866	hsa-mir-452	ENSG00000125851	1	0	1	0	0	1	-0.138379
hg19:7:25989540-25989563:-	HEXDC|284004	-0.660302	1.59e-05	0.0359278	hsa-mir-148a	ENSG00000169660	1	1	1	1	0	1	-0.131607
hg19:17:57918615-57918634:+	PHF17|79960	-0.660224	1.59e-05	0.0359278	hsa-mir-21	ENSG00000077684	0	0	1	1	0	1	-0.241231
hg19:9:97847745-97847767:+	SLCO4A1|28231	-0.660224	1.59e-05	0.0359278	hsa-mir-27b	ENSG00000101187	0	1	0	1	0	1	-0.132652
hg19:13:50623305-50623325:-	CRAMP1L|57585	-0.660224	1.59e-05	0.0359278	hsa-mir-15a	ENSG00000007545	1	0	0	1	1	1	-0.0560124
hg19:11:79113075-79113098:-	SCAMP4|113178	-0.65999	1.61e-05	0.0361122	hsa-mir-708	ENSG00000227500	0	1	0	0	0	1	-0.295083
hg19:19:52196521-52196541:+	EMR2|30817	-0.659944	1.61e-05	0.0361122	hsa-mir-125a	ENSG00000127507	1	1	1	1	0	1	-0.213735
hg19:3:160122395-160122417:+	SERPING1|710	-0.659944	1.61e-05	0.0361122	hsa-mir-15b	ENSG00000149131	0	1	1	1	0	1	-0.200585
hg19:7:99691194-99691214:-	IL17RC|84818	-0.659924	1.61e-05	0.0361318	hsa-mir-25	ENSG00000163702	1	0	1	0	1	0	-0.0168846
hg19:9:73424948-73424969:-	PTPRE|5791	-0.659892	1.61e-05	0.0361598	hsa-mir-204	ENSG00000132334	0	1	0	0	1	0	-0.616575
hg19:11:122022985-122023003:-	B3GALTL|145173	-0.659825	1.62e-05	0.0362265	hsa-mir-100	ENSG00000187676	1	0	0	1	0	1	-0.031683
hg19:10:132760901-132760922:-	BRMS1L|84312	-0.659664	1.63e-05	0.0362859	hsa-mir-378c	ENSG00000100916	1	0	0	0	0	1	-0.219618
hg19:19:50004088-50004111:-	ZNF606|80095	-0.659648	1.63e-05	0.036302	hsa-mir-150	ENSG00000166704	1	0	1	0	1	1	-0.149225
hg19:17:28444113-28444132:+	DCLK2|166614	-0.659569	1.64e-05	0.0363771	hsa-mir-423	ENSG00000170390	0	0	1	1	0	0	-0.284764
hg19:15:89155126-89155146:+	LIPH|200879	-0.659448	1.64e-05	0.0364901	hsa-mir-7-2	ENSG00000163898	1	0	1	1	0	0	-0.450877
hg19:17:79099686-79099708:+	HNMT|3176	-0.65943	1.64e-05	0.0364901	hsa-mir-3065	ENSG00000150540	0	0	1	1	0	1	-0.194703
hg19:14:101521031-101521050:+	XRCC1|7515	-0.659423	1.64e-05	0.0364901	hsa-mir-134	ENSG00000073050	1	0	1	0	0	1	-0.179219
hg19:5:148810263-148810283:+	TKTL1|8277	-0.659389	1.65e-05	0.0364901	hsa-mir-145	ENSG00000007350	0	0	1	0	0	1	-0.1647
hg19:1:207975248-207975269:-	FAM49B|51571	-0.659384	1.65e-05	0.0364901	hsa-mir-29c	ENSG00000153310	0	1	0	0	1	0	-0.283755
hg19:X:133680674-133680695:-	UBASH3B|84959	-0.659384	1.65e-05	0.0364901	hsa-mir-424	ENSG00000154127	1	0	0	0	0	1	-0.219282
hg19:17:46657265-46657288:-	C7orf57|136288	-0.659384	1.65e-05	0.0364901	hsa-mir-10a	ENSG00000164746	1	0	0	1	0	1	-0.207311
hg19:14:101506606-101506628:+	MAGI1|9223	-0.659177	1.66e-05	0.0366589	hsa-mir-654	ENSG00000151276	0	0	1	1	0	1	-0.0920653
hg19:17:1617209-1617230:-	SPEF2|79925	-0.65915	1.66e-05	0.0366589	hsa-mir-22	ENSG00000152582	1	0	1	1	0	1	-0.136161
hg19:14:101340890-101340912:+	ZNF790|388536	-0.659104	1.67e-05	0.0366589	hsa-mir-337	ENSG00000197863	1	1	0	1	0	0	-0.43546
hg19:6:72086709-72086729:-	ETV6|2120	-0.659104	1.67e-05	0.0366589	hsa-mir-30c-2	ENSG00000139083	0	0	1	0	1	1	-0.299492
hg19:17:57918612-57918634:+	POGZ|23126	-0.659104	1.67e-05	0.0366589	hsa-mir-21	ENSG00000143442	1	0	0	1	0	1	-0.284155
hg19:10:104196277-104196302:+	OLFM1|10439	-0.659104	1.67e-05	0.0366589	hsa-mir-146b	ENSG00000130558	1	0	1	1	0	0	-0.106187
hg19:17:28444113-28444132:+	PCDHB15|56121	-0.659008	1.67e-05	0.0367456	hsa-mir-423	ENSG00000113248	0	0	1	0	0	1	-0.144464
hg19:16:67236230-67236252:-	MCHR1|2847	-0.658852	1.68e-05	0.0368441	hsa-mir-328	ENSG00000128285	1	0	0	1	0	0	-0.11209
hg19:19:52196521-52196541:+	DCBLD2|131566	-0.658824	1.68e-05	0.0368441	hsa-mir-125a	ENSG00000057019	0	1	1	0	0	1	-0.22474
hg19:12:7073276-7073296:+	KLHL4|56062	-0.658824	1.68e-05	0.0368441	hsa-mir-141	ENSG00000102271	1	0	0	0	0	1	-0.185987
hg19:21:17912157-17912177:+	VRK3|51231	-0.658824	1.68e-05	0.0368441	hsa-let-7c	ENSG00000105053	1	0	0	0	1	0	-0.079397
hg19:9:111808574-111808594:-	ZKSCAN4|387032	-0.658778	1.69e-05	0.0369003	hsa-mir-32	ENSG00000187626	0	1	0	0	0	1	-0.0669149
hg19:X:45606444-45606463:-	SEMA3D|223117	-0.658543	1.7e-05	0.0370301	hsa-mir-222	ENSG00000153993	0	0	1	1	0	1	-0.461106
hg19:12:7072904-7072926:+	F5|2153	-0.658543	1.7e-05	0.0370301	hsa-mir-200c	ENSG00000198734	0	1	0	0	0	1	-0.284913
hg19:5:148810224-148810245:+	TTC39A|22996	-0.658263	1.72e-05	0.0372437	hsa-mir-145	ENSG00000085831	1	0	0	1	0	1	-0.307915
hg19:2:207974767-207974788:-	THUMPD1|55623	-0.658263	1.72e-05	0.0372437	hsa-mir-2355	ENSG00000066654	1	0	0	0	0	1	-0.0394608
hg19:11:57408726-57408747:+	TRPM3|80036	-0.658257	1.72e-05	0.0372499	hsa-mir-130a	ENSG00000083067	0	0	1	0	0	1	-0.0609611
hg19:6:30552109-30552131:+	MRPL40|64976	-0.658177	1.73e-05	0.037346	hsa-mir-877	ENSG00000185608	0	1	0	0	0	1	0.0271843
hg19:5:136983270-136983293:-	RUSC1|23623	-0.657983	1.74e-05	0.0374687	hsa-mir-874	ENSG00000160753	0	0	1	0	1	1	-0.387141
hg19:10:105154058-105154080:-	KRT83|3889	-0.657983	1.74e-05	0.0374687	hsa-mir-1307	ENSG00000170523	0	0	1	0	0	1	-0.116215
hg19:6:30552109-30552131:+	NRGN|4900	-0.657891	1.75e-05	0.0375654	hsa-mir-877	ENSG00000154146	1	0	0	1	0	0	0.0167942
hg19:7:129414809-129414829:-	MPP2|4355	-0.657889	1.75e-05	0.0375654	hsa-mir-183	ENSG00000108852	0	1	0	1	0	0	-0.130082
hg19:12:57913007-57913028:-	RGAG1|57529	-0.657884	1.75e-05	0.0375654	hsa-mir-616	ENSG00000243978	0	0	1	0	0	1	-0.172726
hg19:17:1617207-1617229:-	NISCH|11188	-0.657703	1.76e-05	0.0376463	hsa-mir-22	ENSG00000010322	1	0	0	0	0	1	-0.370119
hg19:7:99691627-99691647:-	SPEF2|79925	-0.657703	1.76e-05	0.0376463	hsa-mir-106b	ENSG00000152582	1	0	0	0	0	1	-0.0967524
hg19:7:129410289-129410311:-	MORC4|79710	-0.657609	1.77e-05	0.0377451	hsa-mir-182	ENSG00000133131	0	1	0	0	0	1	-0.342835
hg19:22:46509571-46509594:+	ZNF526|116115	-0.657469	1.78e-05	0.0378248	hsa-let-7b	ENSG00000167625	1	1	1	1	0	1	-0.0796033
hg19:7:5535504-5535526:-	FLT4|2324	-0.657423	1.78e-05	0.0378248	hsa-mir-589	ENSG00000037280	0	0	1	1	0	1	-0.258787
hg19:13:50623305-50623325:-	TMCC1|23023	-0.657423	1.78e-05	0.0378248	hsa-mir-15a	ENSG00000172765	1	1	1	0	0	1	0.0466982
hg19:12:7072910-7072927:+	PTPRE|5791	-0.657335	1.79e-05	0.0379258	hsa-mir-200c	ENSG00000132334	0	0	1	0	1	1	-0.281283
hg19:17:79099689-79099709:-	UBE2G1|7326	-0.657329	1.79e-05	0.0379258	hsa-mir-338	ENSG00000132388	1	0	0	0	0	1	-0.282946
hg19:5:148441938-148441958:-	B3GNT1|11041	-0.657281	1.79e-05	0.0379766	hsa-mir-584	ENSG00000174684	1	0	0	1	0	0	-0.0160392
hg19:17:57918616-57918634:+	PHF21A|51317	-0.656909	1.82e-05	0.0381935	hsa-mir-21	ENSG00000135365	1	0	1	0	1	0	-0.349197
hg19:8:135817123-135817144:-	ESYT1|23344	-0.656909	1.82e-05	0.0381935	hsa-mir-30d	ENSG00000139641	0	0	1	0	0	1	-0.285494
hg19:9:97847787-97847808:+	ITGB2|3689	-0.656909	1.82e-05	0.0381935	hsa-mir-27b	ENSG00000160255	0	1	0	0	0	1	-0.250118
hg19:15:89151352-89151374:+	RUNX1|861	-0.656881	1.82e-05	0.0381935	hsa-mir-1179	ENSG00000159216	0	1	0	1	0	1	-0.554339
hg19:21:26946295-26946321:+	C6orf62|81688	-0.65688	1.82e-05	0.0381935	hsa-mir-155	ENSG00000112308	0	0	1	0	1	0	0.109213
hg19:8:135817121-135817143:-	LCP1|3936	-0.656863	1.82e-05	0.0381935	hsa-mir-30d	ENSG00000136167	0	0	1	1	0	0	-0.310502
hg19:21:17912157-17912177:+	RAB27B|5874	-0.656863	1.82e-05	0.0381935	hsa-let-7c	ENSG00000041353	0	0	1	1	0	0	-0.270188
hg19:X:45606441-45606462:-	SETX|23064	-0.656863	1.82e-05	0.0381935	hsa-mir-222	ENSG00000107290	0	0	1	1	0	1	-0.242831
hg19:10:105154058-105154080:-	MXI1|4601	-0.656863	1.82e-05	0.0381935	hsa-mir-1307	ENSG00000119950	0	0	1	0	1	0	-0.19767
hg19:19:50004090-50004111:-	GPR56|9289	-0.656863	1.82e-05	0.0381935	hsa-mir-150	ENSG00000205336	0	1	0	0	1	1	-0.160489
hg19:14:100576052-100576072:+	LARGE|9215	-0.656609	1.84e-05	0.038395	hsa-mir-342	ENSG00000133424	0	0	1	0	0	1	-0.0697708
hg19:12:7073318-7073338:+	GALNT10|55568	-0.656583	1.84e-05	0.038395	hsa-mir-141	ENSG00000164574	1	0	0	1	0	1	-0.102205
hg19:7:150935535-150935560:+	ELTD1|64123	-0.656564	1.84e-05	0.0384187	hsa-mir-671	ENSG00000162618	1	0	0	0	0	1	-0.0148491
hg19:14:101531651-101531672:+	EPB41L1|2036	-0.656532	1.84e-05	0.038451	hsa-mir-409	ENSG00000088367	0	1	0	0	0	1	-0.0551745
hg19:7:99691439-99691461:-	MAT1A|4143	-0.656489	1.85e-05	0.0384997	hsa-mir-93	ENSG00000151224	0	0	1	0	1	0	-0.0318506
hg19:10:104196277-104196297:+	SH2D6|284948	-0.656476	1.85e-05	0.0385172	hsa-mir-146b	ENSG00000152292	0	1	0	0	1	0	-0.622839
hg19:14:101528393-101528415:+	ANKRD36|375248	-0.656369	1.86e-05	0.0386051	hsa-mir-377	ENSG00000135976	0	0	1	1	0	1	0.0150308
hg19:21:17911422-17911442:+	PELO|53918	-0.656303	1.86e-05	0.0386051	hsa-mir-99a	ENSG00000152684	1	0	0	0	0	1	-0.19316
hg19:6:72086706-72086729:-	UBASH3B|84959	-0.656303	1.86e-05	0.0386051	hsa-mir-30c-2	ENSG00000154127	1	0	0	1	0	1	-0.179232
hg19:19:13947406-13947429:-	UBQLNL|143630	-0.656303	1.86e-05	0.0386051	hsa-mir-23a	ENSG00000175518	1	0	0	0	0	1	-0.133529
hg19:6:30552109-30552129:+	SLC12A1|6557	-0.656121	1.87e-05	0.038797	hsa-mir-877	ENSG00000074803	0	0	1	1	0	1	-0.241802
hg19:17:7126661-7126684:-	UBASH3B|84959	-0.656114	1.88e-05	0.038797	hsa-mir-324	ENSG00000154127	0	0	1	0	1	1	-0.324672
hg19:5:159912379-159912400:+	ZNF10|7556	-0.656022	1.88e-05	0.038797	hsa-mir-146a	ENSG00000256223	0	1	1	1	1	1	-0.383432
hg19:17:56408608-56408629:-	WIPF3|644150	-0.656022	1.88e-05	0.038797	hsa-mir-142	ENSG00000122574	1	0	0	1	0	0	-0.330568
hg19:11:57408725-57408747:+	TIGIT|201633	-0.656022	1.88e-05	0.038797	hsa-mir-130a	ENSG00000181847	0	1	0	0	1	0	-0.302874
hg19:1:155165028-155165050:+	OSR1|130497	-0.656022	1.88e-05	0.038797	hsa-mir-92b	ENSG00000143867	0	1	0	1	1	0	-0.171223
hg19:X:85158648-85158669:-	SLC29A1|2030	-0.656022	1.88e-05	0.038797	hsa-mir-361	ENSG00000112759	1	1	0	0	1	1	-0.0474054
hg19:17:57918633-57918656:+	GPR146|115330	-0.655742	1.9e-05	0.0389732	hsa-mir-21	ENSG00000164849	0	0	1	1	0	1	-0.47191
hg19:1:41220044-41220064:+	CPNE4|131034	-0.655742	1.9e-05	0.0389732	hsa-mir-30e	ENSG00000196353	1	1	0	0	0	1	-0.262283
hg19:X:85158649-85158671:-	DDHD2|23259	-0.655742	1.9e-05	0.0389732	hsa-mir-361	ENSG00000085788	0	0	1	0	1	1	-0.0781709
hg19:7:150935535-150935558:+	ZNF541|84215	-0.655694	1.91e-05	0.0390382	hsa-mir-671	ENSG00000118156	0	0	1	0	0	1	0.14369
hg19:3:168269702-168269723:+	MID1|4281	-0.655462	1.92e-05	0.039169	hsa-mir-551b	ENSG00000101871	1	0	0	1	0	0	-0.568644
hg19:9:97847745-97847767:+	CDH6|1004	-0.655462	1.92e-05	0.039169	hsa-mir-27b	ENSG00000113361	0	0	1	1	0	1	-0.311941
hg19:11:64658674-64658696:-	CALM1|801	-0.655462	1.92e-05	0.039169	hsa-mir-192	ENSG00000198668	1	0	0	1	0	0	-0.264649
hg19:14:101506606-101506626:+	CCDC66|285331	-0.655462	1.92e-05	0.039169	hsa-mir-654	ENSG00000180376	1	0	1	1	0	1	-0.246154
hg19:1:9211796-9211816:-	PTK7|5754	-0.655462	1.92e-05	0.039169	hsa-mir-34a	ENSG00000112655	1	0	0	0	0	1	-0.216384
hg19:2:207974767-207974788:-	ZNF721|170960	-0.655462	1.92e-05	0.039169	hsa-mir-2355	ENSG00000182903	1	0	0	0	0	1	-0.0444924
hg19:X:49767772-49767795:+	DCAKD|79877	-0.655414	1.93e-05	0.0392245	hsa-mir-532	ENSG00000172992	1	1	0	1	0	0	0.0463071
hg19:21:17911420-17911443:+	PLCD3|113026	-0.655258	1.94e-05	0.0393613	hsa-mir-99a	ENSG00000161714	0	1	0	1	0	0	-0.111145
hg19:14:65937871-65937891:+	C1orf115|79762	-0.655182	1.95e-05	0.0393613	hsa-mir-625	ENSG00000162817	1	0	0	1	0	0	-0.359235
hg19:21:17912157-17912179:+	AURKA|6790	-0.655182	1.95e-05	0.0393613	hsa-let-7c	ENSG00000087586	0	0	1	1	0	1	-0.21839
hg19:6:72086709-72086729:-	NPLOC4|55666	-0.655182	1.95e-05	0.0393613	hsa-mir-30c-2	ENSG00000182446	1	0	1	1	1	1	-0.185163
hg19:1:41220086-41220104:+	IL17RD|54756	-0.655037	1.96e-05	0.03953	hsa-mir-30e	ENSG00000144730	1	0	0	1	0	0	-0.323654
hg19:19:13947301-13947322:-	CTTN|2017	-0.655034	1.96e-05	0.0395313	hsa-mir-27a	ENSG00000085733	1	0	1	0	1	1	0.0321845
hg19:9:73424947-73424969:-	MAPK7|5598	-0.654902	1.97e-05	0.0395456	hsa-mir-204	ENSG00000166484	0	0	1	0	1	1	-0.381138
hg19:X:85158648-85158669:-	RNF170|81790	-0.654902	1.97e-05	0.0395456	hsa-mir-361	ENSG00000120925	1	0	0	1	0	0	-0.171715
hg19:13:50623305-50623325:-	TRRAP|8295	-0.654902	1.97e-05	0.0395456	hsa-mir-15a	ENSG00000261023	0	0	1	0	0	1	-0.0373174
hg19:16:14397874-14397896:+	EML2|24139	-0.654808	1.97e-05	0.0396469	hsa-mir-193b	ENSG00000125746	1	0	1	0	0	1	-0.0337249
hg19:3:183959193-183959217:+	KCNK9|51305	-0.654733	1.98e-05	0.0397322	hsa-mir-1224	ENSG00000169427	1	0	1	0	0	1	-0.0274584
hg19:1:110141562-110141583:+	DUOXA1|90527	-0.654622	1.99e-05	0.0397496	hsa-mir-197	ENSG00000140254	1	0	0	0	0	1	-0.349041
hg19:X:133680673-133680695:-	MME|4311	-0.654622	1.99e-05	0.0397496	hsa-mir-424	ENSG00000196549	1	0	1	0	1	0	-0.297629
hg19:X:85158649-85158671:-	RNF38|152006	-0.654622	1.99e-05	0.0397496	hsa-mir-361	ENSG00000137075	0	0	1	0	1	0	-0.107083
hg19:12:7073277-7073297:+	GPR179|440435	-0.654584	1.99e-05	0.0397988	hsa-mir-141	ENSG00000260825	0	0	1	0	0	1	0.107451
hg19:8:135812777-135812797:-	CLIP2|7461	-0.654525	2e-05	0.0398583	hsa-mir-30b	ENSG00000106665	0	0	1	1	0	1	-0.235584
hg19:17:79099689-79099709:-	CPOX|1371	-0.654388	2.01e-05	0.0399543	hsa-mir-338	ENSG00000080819	0	0	1	1	0	0	0.0129132
hg19:15:89155126-89155146:+	FYN|2534	-0.654378	2.01e-05	0.0399543	hsa-mir-7-2	ENSG00000010810	1	1	0	1	0	0	-0.244504
hg19:6:72086708-72086729:-	CIITA|4261	-0.654342	2.01e-05	0.0399543	hsa-mir-30c-2	ENSG00000179583	1	0	0	1	0	1	-0.509745
hg19:X:85158645-85158669:-	RCOR2|283248	-0.654342	2.01e-05	0.0399543	hsa-mir-361	ENSG00000167771	0	0	1	0	0	1	-0.426004
hg19:16:67236231-67236252:-	PRRX1|5396	-0.654342	2.01e-05	0.0399543	hsa-mir-328	ENSG00000116132	0	1	0	0	1	0	-0.422052
hg19:17:57918672-57918691:+	NTRK2|4915	-0.654342	2.01e-05	0.0399543	hsa-mir-21	ENSG00000148053	1	1	0	1	1	0	-0.23836
hg19:5:179442361-179442383:-	C1orf213|148898	-0.654342	2.01e-05	0.0399543	hsa-mir-340	ENSG00000249087	1	0	0	1	0	0	-0.0544897
hg19:21:26946295-26946318:+	CHRM3|1131	-0.654062	2.03e-05	0.0401589	hsa-mir-155	ENSG00000133019	1	0	1	1	0	0	-0.36183
hg19:8:135817121-135817143:-	ARSJ|79642	-0.654062	2.03e-05	0.0401589	hsa-mir-30d	ENSG00000180801	1	0	1	1	0	1	-0.179124
hg19:X:109298618-109298639:+	GPR56|9289	-0.654036	2.03e-05	0.0401972	hsa-mir-652	ENSG00000205336	0	1	0	0	1	1	0.0423827
hg19:7:130136004-130136025:+	CLU|1191	-0.653998	2.04e-05	0.0402452	hsa-mir-335	ENSG00000120885	0	1	0	1	1	0	-0.171319
hg19:8:135812816-135812835:-	MFSD11|79157	-0.653894	2.05e-05	0.0403422	hsa-mir-30b	ENSG00000092931	1	1	0	1	1	0	-0.113744
hg19:3:168269702-168269723:+	CNTN5|53942	-0.653873	2.05e-05	0.0403422	hsa-mir-551b	ENSG00000149972	0	0	1	0	0	1	-0.406599
hg19:X:85158649-85158669:-	USP30|84749	-0.653827	2.05e-05	0.0403422	hsa-mir-361	ENSG00000135093	0	1	1	1	0	0	-0.366586
hg19:9:127454796-127454816:+	STX6|10228	-0.653782	2.05e-05	0.0403422	hsa-mir-181a-2	ENSG00000135823	1	0	0	1	0	0	-0.264368
hg19:2:219267415-219267436:+	HNMT|3176	-0.653782	2.05e-05	0.0403422	hsa-mir-26b	ENSG00000150540	1	0	0	1	0	0	-0.198897
hg19:17:56408646-56408667:-	SHROOM3|57619	-0.653782	2.05e-05	0.0403422	hsa-mir-142	ENSG00000138771	1	1	0	1	0	0	-0.115327
hg19:11:72326110-72326133:-	NOL10|79954	-0.653782	2.05e-05	0.0403422	hsa-mir-139	ENSG00000115761	0	0	1	1	1	1	0.0373052
hg19:9:97847787-97847809:+	SLC8A3|6547	-0.653666	2.06e-05	0.0404786	hsa-mir-27b	ENSG00000100678	1	0	1	1	1	1	-0.0547429
hg19:1:110141562-110141583:+	ITGA7|3679	-0.653501	2.08e-05	0.0405519	hsa-mir-197	ENSG00000135424	1	0	1	0	0	1	-0.357656
hg19:X:45605607-45605631:-	NFATC1|4772	-0.653501	2.08e-05	0.0405519	hsa-mir-221	ENSG00000131196	1	0	0	1	0	0	-0.318853
hg19:3:49057634-49057655:-	ATP1B1|481	-0.653501	2.08e-05	0.0405519	hsa-mir-425	ENSG00000143153	0	0	1	1	0	0	-0.103974
hg19:2:177015058-177015077:+	SPAG1|6674	-0.653501	2.08e-05	0.0405519	hsa-mir-10b	ENSG00000104450	0	0	1	0	1	0	0.0636516
hg19:19:13947407-13947429:-	GPER|2852	-0.653407	2.09e-05	0.0406538	hsa-mir-23a	ENSG00000164850	1	0	0	1	0	0	-0.228929
hg19:17:1617207-1617229:-	LRSAM1|90678	-0.653221	2.1e-05	0.0407546	hsa-mir-22	ENSG00000148356	1	0	0	0	0	1	-0.273784
hg19:12:7073318-7073338:+	SMOC2|64094	-0.653221	2.1e-05	0.0407546	hsa-mir-141	ENSG00000112562	0	0	1	0	0	1	-0.232422
hg19:17:28444149-28444170:+	TNRC6C|57690	-0.653221	2.1e-05	0.0407546	hsa-mir-423	ENSG00000078687	1	0	1	1	0	1	-0.0820994
hg19:17:1617207-1617229:-	TUT1|64852	-0.652941	2.12e-05	0.0409825	hsa-mir-22	ENSG00000149016	0	0	1	0	0	1	-0.361547
hg19:21:17912157-17912178:+	INPP4B|8821	-0.652941	2.12e-05	0.0409825	hsa-let-7c	ENSG00000109452	1	0	1	0	0	1	-0.216757
hg19:14:101340890-101340912:+	STRADB|55437	-0.652941	2.12e-05	0.0409825	hsa-mir-337	ENSG00000082146	1	0	1	0	1	1	-0.11391
hg19:7:25989543-25989564:-	OBSL1|23363	-0.652941	2.12e-05	0.0409825	hsa-mir-148a	ENSG00000124006	1	1	1	0	0	1	-0.0894543
hg19:12:7073254-7073276:+	MALL|7851	-0.65291	2.13e-05	0.0410213	hsa-mir-141	ENSG00000144063	1	0	0	1	0	0	0.05739
hg19:17:11985227-11985247:+	FAM154A|158297	-0.652853	2.13e-05	0.0410902	hsa-mir-744	ENSG00000155875	1	0	1	0	1	0	-0.229274
hg19:17:1617209-1617230:-	AGBL4|84871	-0.652847	2.13e-05	0.0410902	hsa-mir-22	ENSG00000186094	1	0	0	0	0	1	-0.204218
hg19:17:57918616-57918634:+	YOD1|55432	-0.652847	2.13e-05	0.0410902	hsa-mir-21	ENSG00000180667	1	0	0	1	0	0	-0.141581
hg19:17:28444149-28444171:+	SFRP4|6424	-0.652661	2.15e-05	0.041165	hsa-mir-423	ENSG00000106483	1	0	0	0	0	1	-0.395667
hg19:21:17962609-17962632:+	LITAF|9516	-0.652661	2.15e-05	0.041165	hsa-mir-125b-2	ENSG00000189067	0	1	0	0	1	1	-0.318653
hg19:7:130561506-130561530:-	EBF3|253738	-0.652661	2.15e-05	0.041165	hsa-mir-29a	ENSG00000108001	1	0	0	1	0	1	-0.279724
hg19:13:92003193-92003216:+	DCAKD|79877	-0.652661	2.15e-05	0.041165	hsa-mir-19a	ENSG00000172992	1	0	1	0	0	1	-0.0704142
hg19:14:101506606-101506628:+	SNX13|23161	-0.652574	2.15e-05	0.0412788	hsa-mir-654	ENSG00000071189	1	0	1	0	0	1	-0.0605696
hg19:21:26946295-26946319:+	ZNF10|7556	-0.652381	2.17e-05	0.0413705	hsa-mir-155	ENSG00000256223	1	0	0	1	0	0	-0.42926
hg19:16:67236230-67236252:-	ADRA2A|150	-0.652381	2.17e-05	0.0413705	hsa-mir-328	ENSG00000150594	0	1	0	1	0	0	-0.401017
hg19:10:105154056-105154079:-	TAL1|6886	-0.652381	2.17e-05	0.0413705	hsa-mir-1307	ENSG00000162367	1	0	1	0	0	1	-0.158552
hg19:22:46509571-46509594:+	WSCD1|23302	-0.652287	2.18e-05	0.0414861	hsa-let-7b	ENSG00000179314	1	0	0	1	0	0	-0.047528
hg19:19:52196521-52196541:+	CDKN2B|1030	-0.652101	2.19e-05	0.0416076	hsa-mir-125a	ENSG00000147883	1	0	1	1	0	0	-0.320805
hg19:10:104196276-104196297:+	ARHGAP28|79822	-0.652046	2.2e-05	0.0416767	hsa-mir-146b	ENSG00000088756	0	1	1	1	0	0	-0.469542
hg19:10:105154058-105154079:-	CRY2|1408	-0.651866	2.21e-05	0.041832	hsa-mir-1307	ENSG00000121671	1	0	1	0	0	1	-0.226079
hg19:3:188406582-188406603:+	MLXIPL|51085	-0.651821	2.22e-05	0.041832	hsa-mir-28	ENSG00000009950	0	0	1	0	0	1	-0.454213
hg19:16:67236230-67236252:-	AEBP1|165	-0.651821	2.22e-05	0.041832	hsa-mir-328	ENSG00000106624	1	0	0	0	0	1	-0.35954
hg19:6:72113255-72113278:-	IL21R|50615	-0.651821	2.22e-05	0.041832	hsa-mir-30a	ENSG00000103522	1	0	0	1	0	0	-0.308758
hg19:12:7073318-7073342:+	EPHA3|2042	-0.651821	2.22e-05	0.041832	hsa-mir-141	ENSG00000044524	0	0	1	0	0	1	-0.293334
hg19:12:7073318-7073336:+	ANK2|287	-0.651821	2.22e-05	0.041832	hsa-mir-141	ENSG00000145362	0	0	1	1	1	1	-0.24641
hg19:10:105154057-105154080:-	CHRAC1|54108	-0.651821	2.22e-05	0.041832	hsa-mir-1307	ENSG00000104472	0	1	0	1	0	0	0.0207194
hg19:12:7073317-7073341:+	LIMS2|55679	-0.651791	2.22e-05	0.041871	hsa-mir-141	ENSG00000072163	1	1	1	0	1	0	0.00315698
hg19:9:73424948-73424969:-	GABRB2|2561	-0.651763	2.22e-05	0.0419034	hsa-mir-204	ENSG00000145864	1	0	0	1	1	1	-0.558065
hg19:2:177015057-177015072:+	ERCC8|1161	-0.651723	2.23e-05	0.0419468	hsa-mir-10b	ENSG00000049167	1	0	0	1	0	1	-0.0529214
hg19:5:85916365-85916383:+	UPF1|5976	-0.65162	2.24e-05	0.0420384	hsa-mir-3607	ENSG00000005007	0	0	1	1	0	0	-0.00296355
hg19:5:85916365-85916383:+	PPFIBP2|8495	-0.65162	2.24e-05	0.0420384	hsa-mir-3607	ENSG00000166387	0	0	1	1	1	1	0.0991023
hg19:22:20020711-20020732:+	TSSK1B|83942	-0.651571	2.24e-05	0.0420384	hsa-mir-185	ENSG00000212122	0	0	1	0	0	1	0.087496
hg19:1:110141562-110141583:+	NFIX|4784	-0.651541	2.24e-05	0.0420384	hsa-mir-197	ENSG00000008441	1	0	0	1	0	0	-0.322527
hg19:9:97847547-97847569:+	VTN|7448	-0.651541	2.24e-05	0.0420384	hsa-mir-23b	ENSG00000262062	0	1	0	0	1	1	-0.107277
hg19:9:73424948-73424969:-	FN1|2335	-0.651409	2.25e-05	0.0421996	hsa-mir-204	ENSG00000115414	0	0	1	1	1	1	-0.551181
hg19:17:1617246-1617268:-	SPTAN1|6709	-0.651306	2.26e-05	0.0422432	hsa-mir-22	ENSG00000197694	0	0	1	0	0	1	-0.330872
hg19:11:79113123-79113144:-	MYO7B|4648	-0.651306	2.26e-05	0.0422432	hsa-mir-708	ENSG00000169994	0	0	1	0	0	1	-0.115148
hg19:14:102026663-102026684:-	ABTB2|25841	-0.651306	2.26e-05	0.0422432	hsa-mir-1247	ENSG00000166016	1	0	1	0	1	1	0.0672708
hg19:1:207975248-207975269:-	MRC1|4360	-0.65126	2.27e-05	0.0422432	hsa-mir-29c	ENSG00000260314	0	0	1	0	0	1	-0.406129
hg19:19:13985724-13985745:+	ATP6V0D1|9114	-0.65126	2.27e-05	0.0422432	hsa-mir-181d	ENSG00000159720	1	0	1	0	0	1	-0.368068
hg19:5:136983271-136983293:-	GPR68|8111	-0.65126	2.27e-05	0.0422432	hsa-mir-874	ENSG00000119714	1	0	0	0	1	1	-0.354622
hg19:19:52196091-52196112:+	INPP4B|8821	-0.65126	2.27e-05	0.0422432	hsa-let-7e	ENSG00000109452	1	0	0	0	0	1	-0.200312
hg19:17:1953224-1953245:-	ONECUT2|9480	-0.650932	2.3e-05	0.0425367	hsa-mir-132	ENSG00000119547	1	0	0	1	0	0	-0.165628
hg19:7:99691627-99691648:-	LRP2BP|55805	-0.650906	2.3e-05	0.0425709	hsa-mir-106b	ENSG00000109771	1	0	0	1	1	0	-0.0293344
hg19:7:129410289-129410311:-	ESYT3|83850	-0.650886	2.3e-05	0.0425941	hsa-mir-182	ENSG00000158220	1	0	1	0	0	1	-0.249943
hg19:7:130135971-130135989:+	ACOXL|55289	-0.650875	2.3e-05	0.0426056	hsa-mir-335	ENSG00000153093	0	0	1	0	0	1	0.0204065
hg19:17:1953227-1953245:-	SLC12A1|6557	-0.650776	2.31e-05	0.0426914	hsa-mir-132	ENSG00000074803	0	0	1	0	0	1	-0.140562
hg19:7:129414807-129414824:-	KCTD2|23510	-0.650766	2.31e-05	0.0426914	hsa-mir-183	ENSG00000180901	1	0	0	1	0	0	-0.0369798
hg19:3:183959193-183959213:+	CHST2|9435	-0.650527	2.33e-05	0.0428936	hsa-mir-1224	ENSG00000175040	1	0	0	0	1	1	0.0323473
hg19:X:133675395-133675417:-	SYTL2|54843	-0.65042	2.34e-05	0.0428936	hsa-mir-542	ENSG00000137501	1	1	1	0	1	1	-0.344796
hg19:X:45605610-45605630:-	SLC43A1|8501	-0.65042	2.34e-05	0.0428936	hsa-mir-221	ENSG00000149150	0	1	0	1	0	1	-0.343351
hg19:14:101506606-101506626:+	THAP10|56906	-0.65042	2.34e-05	0.0428936	hsa-mir-654	ENSG00000129028	0	0	1	0	1	1	-0.300264
hg19:11:121970518-121970538:-	ANK2|287	-0.65042	2.34e-05	0.0428936	hsa-mir-125b-1	ENSG00000145362	0	0	1	0	0	1	-0.292353
hg19:1:41220084-41220103:+	LCT|3938	-0.650408	2.34e-05	0.0429066	hsa-mir-30e	ENSG00000115850	0	0	1	1	0	0	-0.292369
hg19:7:25989542-25989559:-	HPN|3249	-0.650332	2.35e-05	0.0430097	hsa-mir-148a	ENSG00000105707	0	0	1	0	0	1	-0.297524
hg19:19:50004090-50004113:-	LRRC37A3|374819	-0.65014	2.37e-05	0.043135	hsa-mir-150	ENSG00000176809	0	1	0	0	0	1	-0.294784
hg19:1:205417492-205417512:-	HGF|3082	-0.65014	2.37e-05	0.043135	hsa-mir-135b	ENSG00000019991	0	0	1	0	0	1	-0.111779
hg19:13:50623305-50623325:-	SPEN|23013	-0.65014	2.37e-05	0.043135	hsa-mir-15a	ENSG00000065526	0	0	1	0	0	1	-0.102178
hg19:17:27188568-27188587:-	NPY1R|4886	-0.650094	2.37e-05	0.0431905	hsa-mir-144	ENSG00000164128	0	1	0	1	1	1	0.00116307
hg19:8:41518002-41518023:-	KAT2A|2648	-0.650019	2.38e-05	0.0432833	hsa-mir-486	ENSG00000259958	1	0	1	0	0	1	-0.0561709
hg19:X:85158648-85158669:-	GALC|2581	-0.64986	2.39e-05	0.0433586	hsa-mir-361	ENSG00000054983	1	0	0	1	0	0	-0.0510099
hg19:5:179442361-179442383:-	TCAP|8557	-0.64986	2.39e-05	0.0433586	hsa-mir-340	ENSG00000173991	0	1	0	0	1	0	-0.0104618
hg19:3:183959193-183959213:+	TRPV1|7442	-0.64982	2.4e-05	0.0434171	hsa-mir-1224	ENSG00000196689	1	0	1	1	1	1	-0.015074
hg19:19:13985540-13985561:+	SIGLEC9|27180	-0.649794	2.4e-05	0.0434497	hsa-mir-181c	ENSG00000129450	0	0	1	0	0	1	-0.133522
hg19:X:85158685-85158708:-	MDGA1|266727	-0.64958	2.42e-05	0.0435996	hsa-mir-361	ENSG00000112139	1	0	1	1	0	1	-0.183613
hg19:X:49767773-49767794:+	DTNB|1838	-0.64958	2.42e-05	0.0435996	hsa-mir-532	ENSG00000138101	1	0	0	0	1	0	-0.078562
hg19:1:155165028-155165049:+	TMEM132C|92293	-0.649419	2.43e-05	0.0437869	hsa-mir-92b	ENSG00000181234	0	0	1	0	1	1	-0.369392
hg19:12:7073276-7073297:+	CORO2B|10391	-0.649391	2.44e-05	0.0437869	hsa-mir-141	ENSG00000103647	1	0	0	0	1	0	-0.0542312
hg19:2:241395432-241395451:+	OSBP2|23762	-0.649317	2.44e-05	0.0437869	hsa-mir-149	ENSG00000184792	0	1	1	1	1	1	-0.0740761
hg19:16:69967045-69967064:+	NEK8|284086	-0.649309	2.44e-05	0.0437869	hsa-mir-140	ENSG00000160602	1	0	0	1	0	1	-0.0746427
hg19:1:9211796-9211816:-	BOC|91653	-0.6493	2.44e-05	0.0437869	hsa-mir-34a	ENSG00000144857	1	0	0	0	0	1	-0.423892
hg19:19:50004089-50004111:-	WDR90|197335	-0.6493	2.44e-05	0.0437869	hsa-mir-150	ENSG00000161996	1	0	1	0	0	1	-0.355867
hg19:2:177015058-177015076:+	ETV1|2115	-0.6493	2.44e-05	0.0437869	hsa-mir-10b	ENSG00000006468	1	0	1	1	1	0	-0.171989
hg19:X:45606438-45606463:-	TMEM132C|92293	-0.649278	2.45e-05	0.0438142	hsa-mir-222	ENSG00000181234	0	0	1	1	0	0	-0.325842
hg19:12:7072906-7072928:+	ZEB1|6935	-0.649247	2.45e-05	0.0438473	hsa-mir-200c	ENSG00000148516	0	0	1	1	0	0	-0.126358
hg19:17:28444113-28444132:+	IGFBP5|3488	-0.649201	2.45e-05	0.0438913	hsa-mir-423	ENSG00000115461	1	0	0	1	0	1	0.0234403
hg19:7:25989542-25989561:-	SMYD5|10322	-0.64919	2.45e-05	0.0439059	hsa-mir-148a	ENSG00000135632	1	0	1	1	0	1	-0.130954
hg19:10:104196278-104196301:+	EIF2S1|1965	-0.649111	2.46e-05	0.0439711	hsa-mir-146b	ENSG00000134001	0	0	1	1	0	0	-0.0990288
hg19:X:45606441-45606462:-	SIK2|23235	-0.64902	2.47e-05	0.0439711	hsa-mir-222	ENSG00000170145	1	0	0	0	0	1	-0.170267
hg19:9:97847745-97847767:+	SH3TC2|79628	-0.64902	2.47e-05	0.0439711	hsa-mir-27b	ENSG00000169247	1	1	1	1	0	0	-0.169285
hg19:14:100576052-100576076:+	CSTF3|1479	-0.64902	2.47e-05	0.0439711	hsa-mir-342	ENSG00000176102	0	1	0	1	0	0	0.0326868
hg19:5:159912378-159912401:+	PTPRB|5787	-0.648938	2.48e-05	0.0440823	hsa-mir-146a	ENSG00000127329	1	0	1	1	0	1	-0.117829
hg19:14:101514286-101514306:+	CPEB3|22849	-0.648914	2.48e-05	0.0441015	hsa-mir-889	ENSG00000107864	0	0	1	1	0	0	-0.0341306
hg19:10:105154098-105154119:-	LATS2|26524	-0.648785	2.49e-05	0.0441986	hsa-mir-1307	ENSG00000150457	0	1	1	0	0	1	-0.36626
hg19:5:136983271-136983292:-	GPR35|2859	-0.64874	2.5e-05	0.0441986	hsa-mir-874	ENSG00000178623	0	0	1	1	0	1	-0.0880203
hg19:14:101506606-101506628:+	KIF27|55582	-0.6485	2.52e-05	0.0444174	hsa-mir-654	ENSG00000165115	0	0	1	0	0	1	-0.0463296
hg19:X:146312271-146312293:-	AP3B2|8120	-0.648461	2.52e-05	0.0444174	hsa-mir-506	ENSG00000103723	1	0	0	0	1	1	-0.0353947
hg19:X:133675396-133675417:-	MDM2|4193	-0.648459	2.52e-05	0.0444174	hsa-mir-542	ENSG00000135679	1	0	0	1	1	0	-0.159553
hg19:11:79113076-79113097:-	MYH7B|57644	-0.648459	2.52e-05	0.0444174	hsa-mir-708	ENSG00000078814	0	0	1	0	0	1	-0.151453
hg19:13:50623305-50623325:-	PPFIBP1|8496	-0.648459	2.52e-05	0.0444174	hsa-mir-15a	ENSG00000110841	1	0	0	1	0	0	-0.133716
hg19:13:50623305-50623325:-	KDM3B|51780	-0.648459	2.52e-05	0.0444174	hsa-mir-15a	ENSG00000120733	1	0	1	0	0	1	-0.122132
hg19:17:56408604-56408626:-	APLP2|334	-0.648431	2.53e-05	0.044456	hsa-mir-142	ENSG00000084234	1	0	1	0	0	1	-0.293627
hg19:11:122022984-122022999:-	PLAG1|5324	-0.648422	2.53e-05	0.0444685	hsa-mir-100	ENSG00000181690	1	0	0	0	0	1	-0.168969
hg19:17:1953224-1953244:-	PLXNA3|55558	-0.648242	2.55e-05	0.0446219	hsa-mir-132	ENSG00000130827	1	0	0	0	0	1	-0.0775433
hg19:14:101506606-101506628:+	AFF1|4299	-0.648219	2.55e-05	0.0446219	hsa-mir-654	ENSG00000172493	1	0	0	1	1	1	-0.0200201
hg19:10:104196277-104196296:+	ESYT2|57488	-0.648179	2.55e-05	0.0446219	hsa-mir-146b	ENSG00000117868	1	0	0	1	0	0	-0.423833
hg19:3:160122395-160122416:+	ARHGEF3|50650	-0.648179	2.55e-05	0.0446219	hsa-mir-15b	ENSG00000163947	1	0	1	1	0	0	-0.313457
hg19:10:105154057-105154079:-	LRRC48|83450	-0.648179	2.55e-05	0.0446219	hsa-mir-1307	ENSG00000171962	0	0	1	0	1	0	-0.208013
hg19:17:28444149-28444172:+	SH3RF3|344558	-0.648179	2.55e-05	0.0446219	hsa-mir-423	ENSG00000172985	0	0	1	0	0	1	-0.172243
hg19:7:129410288-129410305:-	NYNRIN|57523	-0.648153	2.55e-05	0.0446489	hsa-mir-182	ENSG00000205978	1	0	0	0	0	1	-0.101197
hg19:10:104196276-104196297:+	RHOBTB1|9886	-0.647982	2.57e-05	0.0448373	hsa-mir-146b	ENSG00000072422	0	0	1	1	0	0	-0.372216
hg19:1:9211796-9211816:-	BDKRB2|624	-0.647899	2.58e-05	0.0448373	hsa-mir-34a	ENSG00000168398	0	1	0	1	0	0	-0.333998
hg19:5:148810263-148810285:+	RANBP9|10048	-0.647868	2.58e-05	0.0448758	hsa-mir-145	ENSG00000010017	0	0	1	0	0	1	-0.0747578
hg19:9:131007028-131007047:-	USP6|9098	-0.647842	2.58e-05	0.0449135	hsa-mir-199b	ENSG00000129204	1	0	1	1	1	1	-0.233642
hg19:14:100774213-100774235:+	LOX|4015	-0.647619	2.61e-05	0.0450666	hsa-mir-345	ENSG00000113083	0	0	1	1	0	0	-0.406051
hg19:9:97847745-97847766:+	SOD2|6648	-0.647619	2.61e-05	0.0450666	hsa-mir-27b	ENSG00000112096	1	0	0	1	1	1	-0.330462
hg19:1:155165028-155165050:+	ACHE|43	-0.647619	2.61e-05	0.0450666	hsa-mir-92b	ENSG00000087085	0	1	0	1	0	0	-0.192974
hg19:X:49767773-49767794:+	IL11RA|3590	-0.647619	2.61e-05	0.0450666	hsa-mir-532	ENSG00000137070	1	0	1	0	1	0	-0.161592
hg19:7:129410293-129410311:-	TEX2|55852	-0.647339	2.63e-05	0.0453095	hsa-mir-182	ENSG00000136478	0	1	1	1	0	1	-0.167625
hg19:X:85158649-85158671:-	NTRK3|4916	-0.647339	2.63e-05	0.0453095	hsa-mir-361	ENSG00000140538	1	0	1	1	0	0	-0.135286
hg19:2:219267380-219267402:+	PLCB2|5330	-0.647339	2.63e-05	0.0453095	hsa-mir-26b	ENSG00000137841	1	0	1	0	0	1	-0.0315159
hg19:5:148808539-148808560:+	MYO3A|53904	-0.647224	2.65e-05	0.0454489	hsa-mir-143	ENSG00000095777	1	0	0	1	0	1	-0.167326
hg19:17:1953583-1953605:-	HS1BP3|64342	-0.647072	2.66e-05	0.045523	hsa-mir-212	ENSG00000118960	1	0	0	1	0	1	-0.193111
hg19:1:110141562-110141583:+	SGSM2|9905	-0.647059	2.66e-05	0.045523	hsa-mir-197	ENSG00000141258	0	0	1	1	0	1	-0.389352
hg19:6:72086710-72086729:-	KIFAP3|22920	-0.647059	2.66e-05	0.045523	hsa-mir-30c-2	ENSG00000075945	0	1	1	0	1	0	-0.381793
hg19:1:205417489-205417512:-	IRAK3|11213	-0.647059	2.66e-05	0.045523	hsa-mir-135b	ENSG00000090376	1	0	0	0	0	1	-0.166047
hg19:6:72113257-72113279:-	UBE2N|7334	-0.647009	2.67e-05	0.0455905	hsa-mir-30a	ENSG00000177889	1	0	0	1	0	0	-0.0158476
hg19:14:101514286-101514307:+	EPB41L1|2036	-0.646964	2.67e-05	0.0456356	hsa-mir-889	ENSG00000088367	0	0	1	1	0	0	-0.0123419
hg19:5:179225279-179225301:-	PNLDC1|154197	-0.646908	2.68e-05	0.045713	hsa-mir-1229	ENSG00000146453	0	0	1	0	0	1	-0.3151
hg19:10:104196314-104196332:+	THSD4|79875	-0.646818	2.69e-05	0.045749	hsa-mir-146b	ENSG00000187720	0	0	1	0	1	0	0.0776407
hg19:19:52195871-52195890:+	HGF|3082	-0.646779	2.69e-05	0.045749	hsa-mir-99b	ENSG00000019991	0	1	0	1	0	0	-0.31967
hg19:17:46657269-46657289:-	TRDMT1|1787	-0.646779	2.69e-05	0.045749	hsa-mir-10a	ENSG00000107614	1	0	0	1	0	1	-0.173861
hg19:7:25989580-25989602:-	PPAP2C|8612	-0.646779	2.69e-05	0.045749	hsa-mir-148a	ENSG00000141934	0	1	1	1	0	0	-0.145317
hg19:17:46657266-46657288:-	PDHX|8050	-0.646779	2.69e-05	0.045749	hsa-mir-10a	ENSG00000110435	0	0	1	1	0	1	-0.10295
hg19:1:155165028-155165047:+	ACVR1B|91	-0.646779	2.69e-05	0.045749	hsa-mir-92b	ENSG00000135503	1	1	1	0	0	1	-0.094586
hg19:7:99691440-99691460:-	RBM19|9904	-0.646756	2.69e-05	0.0457774	hsa-mir-93	ENSG00000122965	0	0	1	0	0	1	-0.000757184
hg19:5:136983272-136983292:-	DGCR2|9993	-0.646594	2.71e-05	0.0459867	hsa-mir-874	ENSG00000070413	1	1	1	1	0	0	-0.0676362
hg19:9:73424947-73424969:-	SNAP25|6616	-0.646499	2.72e-05	0.04599	hsa-mir-204	ENSG00000132639	0	1	0	0	1	0	-0.551439
hg19:14:100774213-100774235:+	TPM3|7170	-0.646499	2.72e-05	0.04599	hsa-mir-345	ENSG00000143549	1	0	0	0	1	0	-0.456472
hg19:17:11985283-11985304:+	ANTXR2|118429	-0.646499	2.72e-05	0.04599	hsa-mir-744	ENSG00000163297	0	1	0	0	1	0	-0.41403
hg19:9:131007062-131007085:-	BLNK|29760	-0.646499	2.72e-05	0.04599	hsa-mir-199b	ENSG00000262509	0	0	1	0	1	0	-0.111328
hg19:17:79099689-79099709:-	DSE|29940	-0.646404	2.73e-05	0.0461171	hsa-mir-338	ENSG00000111817	0	1	0	1	0	1	-0.358627
hg19:7:129410285-129410305:-	AP3S2|10239	-0.646365	2.73e-05	0.0461687	hsa-mir-182	ENSG00000157823	1	0	0	1	0	0	0.106622
hg19:12:54731023-54731046:+	CCDC109B|55013	-0.646359	2.73e-05	0.0461755	hsa-mir-148b	ENSG00000005059	1	0	0	0	0	1	-0.192149
hg19:19:52196521-52196541:+	MICALL1|85377	-0.646218	2.75e-05	0.0462249	hsa-mir-125a	ENSG00000100139	0	0	1	1	1	1	-0.374104
hg19:14:65937871-65937891:+	ABCA2|20	-0.646218	2.75e-05	0.0462249	hsa-mir-625	ENSG00000107331	1	0	1	1	0	1	-0.327206
hg19:X:49767773-49767794:+	PNMA3|29944	-0.646218	2.75e-05	0.0462249	hsa-mir-532	ENSG00000183837	1	0	1	0	1	0	-0.0606697
hg19:10:105154058-105154079:-	MAP6|4135	-0.646124	2.76e-05	0.0463496	hsa-mir-1307	ENSG00000171533	0	0	1	0	0	1	-0.219964
hg19:17:57918616-57918634:+	PTPRM|5797	-0.645984	2.77e-05	0.0464612	hsa-mir-21	ENSG00000173482	0	0	1	0	0	1	-0.00611205
hg19:13:50623305-50623325:-	YEATS2|55689	-0.645938	2.78e-05	0.0464612	hsa-mir-15a	ENSG00000163872	1	0	0	1	0	1	-0.0613418
hg19:15:59463392-59463413:-	DNAJB13|374407	-0.645888	2.78e-05	0.0465324	hsa-mir-2116	ENSG00000187726	1	1	0	0	1	0	-0.190762
hg19:9:97847744-97847766:+	CLU|1191	-0.645837	2.79e-05	0.046584	hsa-mir-27b	ENSG00000120885	0	0	1	1	0	1	0.0395904
hg19:19:46142309-46142329:-	SAE1|10055	-0.645835	2.79e-05	0.046584	hsa-mir-330	ENSG00000142230	0	1	0	1	0	1	-0.0907999
hg19:14:101492408-101492429:+	APLP2|334	-0.645819	2.79e-05	0.0466064	hsa-mir-758	ENSG00000084234	1	0	1	0	0	1	-0.183833
hg19:7:129410288-129410304:-	PLAG1|5324	-0.645672	2.81e-05	0.0466698	hsa-mir-182	ENSG00000181690	1	0	0	1	0	1	-0.288887
hg19:X:49767773-49767794:+	LGR6|59352	-0.645658	2.81e-05	0.0466698	hsa-mir-532	ENSG00000133067	1	0	1	0	0	1	-0.293264
hg19:7:129414807-129414824:-	MED29|55588	-0.645574	2.82e-05	0.0467942	hsa-mir-183	ENSG00000063322	1	0	0	1	0	0	0.106664
hg19:14:101514286-101514306:+	CTTNBP2|83992	-0.64555	2.82e-05	0.0468093	hsa-mir-889	ENSG00000077063	0	0	1	1	0	0	-0.0258572
hg19:X:133303411-133303434:-	FAM118A|55007	-0.645443	2.83e-05	0.0468967	hsa-mir-363	ENSG00000100376	0	1	0	1	1	0	0.0573887
hg19:1:155165028-155165047:+	AXIN2|8313	-0.645378	2.84e-05	0.0468967	hsa-mir-92b	ENSG00000168646	0	1	1	0	0	1	-0.256562
hg19:1:155165028-155165047:+	IRS1|3667	-0.645378	2.84e-05	0.0468967	hsa-mir-92b	ENSG00000169047	0	0	1	0	0	1	-0.219138
hg19:12:7073276-7073296:+	AGPAT4|56895	-0.645378	2.84e-05	0.0468967	hsa-mir-141	ENSG00000026652	1	0	0	1	1	1	-0.149387
hg19:2:219267380-219267402:+	CD101|9398	-0.645378	2.84e-05	0.0468967	hsa-mir-26b	ENSG00000134256	0	0	1	0	0	1	-0.0847586
hg19:7:129414807-129414830:-	USHBP1|83878	-0.645134	2.86e-05	0.0471204	hsa-mir-183	ENSG00000130307	1	0	0	0	0	1	0.232836
hg19:9:97847745-97847767:+	VOPP1|81552	-0.645098	2.87e-05	0.0471204	hsa-mir-27b	ENSG00000154978	1	0	0	1	0	0	-0.340359
hg19:1:110141562-110141583:+	PLXND1|23129	-0.645098	2.87e-05	0.0471204	hsa-mir-197	ENSG00000004399	0	0	1	1	0	1	-0.321452
hg19:8:135817122-135817144:-	AGFG1|3267	-0.645098	2.87e-05	0.0471204	hsa-mir-30d	ENSG00000173744	0	0	1	1	0	1	-0.245666
hg19:10:105154058-105154080:-	RNF170|81790	-0.645098	2.87e-05	0.0471204	hsa-mir-1307	ENSG00000120925	0	1	0	0	1	0	-0.194262
hg19:3:49058106-49058128:-	ANTXR2|118429	-0.645098	2.87e-05	0.0471204	hsa-mir-191	ENSG00000163297	1	0	0	0	1	0	-0.135382
hg19:14:101506606-101506628:+	ZNF585A|199704	-0.644847	2.9e-05	0.0473634	hsa-mir-654	ENSG00000196967	1	0	0	1	0	0	-0.0684958
hg19:X:45606441-45606462:-	ZFYVE9|9372	-0.644818	2.9e-05	0.0473634	hsa-mir-222	ENSG00000157077	0	0	1	0	1	0	-0.299146
hg19:3:49057634-49057655:-	EPOR|2057	-0.644818	2.9e-05	0.0473634	hsa-mir-425	ENSG00000187266	0	0	1	0	0	1	-0.229373
hg19:7:99691627-99691647:-	KCTD7|154881	-0.644818	2.9e-05	0.0473634	hsa-mir-106b	ENSG00000243335	1	0	1	1	0	0	-0.187869
hg19:X:151127103-151127124:-	DLST|1743	-0.644682	2.91e-05	0.047552	hsa-mir-224	ENSG00000119689	1	0	1	1	0	1	-0.0219414
hg19:19:13947407-13947430:-	TERF2IP|54386	-0.644538	2.93e-05	0.0476109	hsa-mir-23a	ENSG00000166848	1	0	0	1	0	1	-0.305072
hg19:7:99691627-99691647:-	ASB8|140461	-0.644538	2.93e-05	0.0476109	hsa-mir-106b	ENSG00000177981	1	0	0	0	1	0	-0.186597
hg19:X:49774343-49774364:+	TMPRSS6|164656	-0.644469	2.94e-05	0.0477049	hsa-mir-501	ENSG00000187045	1	0	0	0	0	1	-0.270967
hg19:7:129410286-129410311:-	RRBP1|6238	-0.644443	2.94e-05	0.0477288	hsa-mir-182	ENSG00000125844	0	0	1	1	0	1	-0.194712
hg19:17:28444113-28444133:+	OPRL1|4987	-0.644443	2.94e-05	0.0477288	hsa-mir-423	ENSG00000125510	1	0	0	1	1	1	-0.0256166
hg19:14:101531682-101531705:+	TFE3|7030	-0.644434	2.94e-05	0.047737	hsa-mir-409	ENSG00000068323	1	0	0	0	0	1	-0.125945
hg19:14:101506606-101506628:+	ZNF585B|92285	-0.644426	2.94e-05	0.0477459	hsa-mir-654	ENSG00000245680	1	1	1	0	1	0	-0.0640674
hg19:X:45606440-45606463:-	SAMD5|389432	-0.644258	2.96e-05	0.0478281	hsa-mir-222	ENSG00000203727	1	0	0	1	0	0	-0.357969
hg19:9:97847787-97847809:+	TMEM206|55248	-0.644258	2.96e-05	0.0478281	hsa-mir-27b	ENSG00000065600	1	0	0	1	0	1	-0.340882
hg19:7:129414581-129414602:-	THRA|7067	-0.644258	2.96e-05	0.0478281	hsa-mir-96	ENSG00000126351	0	1	0	0	0	1	-0.246675
hg19:5:148441935-148441958:-	OBSCN|84033	-0.644244	2.96e-05	0.0478458	hsa-mir-584	ENSG00000154358	1	1	1	1	0	1	-0.0572207
hg19:17:27188601-27188620:-	PHKA1|5255	-0.644202	2.97e-05	0.0479028	hsa-mir-144	ENSG00000067177	0	0	1	1	0	1	0.0171515
hg19:22:46509625-46509644:+	ZFAND3|60685	-0.644085	2.98e-05	0.048068	hsa-let-7b	ENSG00000156639	0	0	1	1	0	0	-0.0399602
hg19:14:102026663-102026684:-	PLAG1|5324	-0.644023	2.99e-05	0.048068	hsa-mir-1247	ENSG00000181690	0	0	1	0	1	0	-0.190325
hg19:17:1617207-1617229:-	RCOR2|283248	-0.643978	2.99e-05	0.048068	hsa-mir-22	ENSG00000167771	0	0	1	1	1	0	-0.407771
hg19:2:177015058-177015077:+	LPGAT1|9926	-0.643978	2.99e-05	0.048068	hsa-mir-10b	ENSG00000123684	1	0	0	1	0	0	-0.0379539
hg19:17:28444113-28444136:+	LMCD1|29995	-0.643698	3.02e-05	0.0483251	hsa-mir-423	ENSG00000071282	0	1	0	0	0	1	-0.361911
hg19:21:17911421-17911441:+	DSE|29940	-0.643698	3.02e-05	0.0483251	hsa-mir-99a	ENSG00000111817	1	0	1	0	0	1	-0.243678
hg19:16:69967045-69967065:+	SLC16A4|9122	-0.643698	3.02e-05	0.0483251	hsa-mir-140	ENSG00000168679	1	0	1	0	0	1	-0.0892841
hg19:13:50623305-50623325:-	TAF1|6872	-0.643698	3.02e-05	0.0483251	hsa-mir-15a	ENSG00000147133	0	0	1	0	0	1	-0.0535684
hg19:14:101506606-101506628:+	ZNF737|100129842	-0.643583	3.04e-05	0.0484804	hsa-mir-654	ENSG00000262578	0	0	1	0	0	1	-0.0845446
hg19:22:38243739-38243760:-	DOK6|220164	-0.643571	3.04e-05	0.0484968	hsa-mir-659	ENSG00000206052	1	0	0	0	0	1	-0.142369
hg19:17:1617209-1617230:-	ARMCX5|64860	-0.643462	3.05e-05	0.0485822	hsa-mir-22	ENSG00000125962	0	1	0	0	1	1	-0.190098
hg19:17:57918672-57918691:+	TMEM67|91147	-0.643417	3.06e-05	0.0485822	hsa-mir-21	ENSG00000164953	0	0	1	0	1	1	-0.433516
hg19:11:72326111-72326133:-	CELSR3|1951	-0.643417	3.06e-05	0.0485822	hsa-mir-139	ENSG00000008300	0	0	1	0	0	1	-0.325576
hg19:17:57918612-57918634:+	DNHD1|144132	-0.643417	3.06e-05	0.0485822	hsa-mir-21	ENSG00000179532	0	0	1	0	0	1	-0.244614
hg19:X:133680673-133680695:-	EREG|2069	-0.643417	3.06e-05	0.0485822	hsa-mir-424	ENSG00000124882	0	0	1	0	0	1	-0.161701
hg19:22:20073635-20073656:+	HCN4|10021	-0.643329	3.07e-05	0.0487167	hsa-mir-1306	ENSG00000138622	0	0	1	1	1	0	-0.113378
hg19:10:105154058-105154079:-	CIRBP|1153	-0.643182	3.08e-05	0.0488178	hsa-mir-1307	ENSG00000099622	0	1	0	0	1	0	-0.395313
hg19:22:46509571-46509591:+	TTC39A|22996	-0.643137	3.09e-05	0.0488178	hsa-let-7b	ENSG00000085831	1	0	0	0	0	1	-0.505348
hg19:19:50004090-50004113:-	ZNF256|10172	-0.643137	3.09e-05	0.0488178	hsa-mir-150	ENSG00000152454	1	0	1	0	0	1	-0.310807
hg19:7:130136002-130136025:+	CLEC10A|10462	-0.643137	3.09e-05	0.0488178	hsa-mir-335	ENSG00000132514	1	0	1	0	0	1	-0.225903
hg19:2:219267380-219267402:+	MYO1F|4542	-0.643137	3.09e-05	0.0488178	hsa-mir-26b	ENSG00000262149	0	0	1	0	0	1	-0.0351289
hg19:8:135817160-135817184:-	PTGIS|5740	-0.643042	3.1e-05	0.0489451	hsa-mir-30d	ENSG00000124212	1	0	0	1	0	0	-0.268111
hg19:3:188406622-188406643:+	ICAM5|7087	-0.642857	3.12e-05	0.0490805	hsa-mir-28	ENSG00000105376	0	0	1	0	1	0	-0.43058
hg19:7:99691627-99691647:-	PPFIBP2|8495	-0.642857	3.12e-05	0.0490805	hsa-mir-106b	ENSG00000166387	0	1	1	0	0	1	-0.317531
hg19:9:97847745-97847766:+	TIGIT|201633	-0.642857	3.12e-05	0.0490805	hsa-mir-27b	ENSG00000181847	1	1	0	0	1	1	-0.232297
hg19:16:67236230-67236252:-	DNM1|1759	-0.642857	3.12e-05	0.0490805	hsa-mir-328	ENSG00000106976	0	0	1	0	0	1	-0.227806
hg19:14:101488408-101488426:+	LCA5L|150082	-0.642762	3.13e-05	0.049202	hsa-mir-379	ENSG00000157578	0	0	1	0	1	0	-0.195215
hg19:5:148441935-148441958:-	LMO3|55885	-0.642702	3.14e-05	0.0492946	hsa-mir-584	ENSG00000048540	0	1	0	1	0	0	-0.0837291
hg19:9:97848344-97848365:-	BAIAP3|8938	-0.642691	3.14e-05	0.0493116	hsa-mir-3074	ENSG00000007516	1	0	0	0	0	1	-0.254675
hg19:17:57918635-57918657:+	RERG|85004	-0.642577	3.15e-05	0.0493366	hsa-mir-21	ENSG00000134533	1	0	0	1	0	0	-0.410938
hg19:1:207975248-207975269:-	JAKMIP2|9832	-0.642577	3.15e-05	0.0493366	hsa-mir-29c	ENSG00000176049	1	0	0	0	1	1	-0.259589
hg19:14:100774213-100774235:+	UNC13D|201294	-0.642297	3.19e-05	0.0495768	hsa-mir-345	ENSG00000092929	1	0	0	0	0	1	-0.532189
hg19:17:1617207-1617229:-	PBX1|5087	-0.642297	3.19e-05	0.0495768	hsa-mir-22	ENSG00000185630	1	0	0	0	1	1	-0.366129
hg19:10:104196276-104196299:+	TRPM3|80036	-0.642278	3.19e-05	0.0496004	hsa-mir-146b	ENSG00000083067	1	0	0	0	0	1	-0.530803
hg19:X:146341179-146341202:-	DIDO1|11083	-0.642182	3.2e-05	0.0497087	hsa-mir-509-3	ENSG00000101191	1	0	1	0	0	1	-0.115287
hg19:19:46142268-46142290:-	KCNH7|90134	-0.64209	3.21e-05	0.0497741	hsa-mir-330	ENSG00000184611	0	0	1	1	0	1	-0.234151
hg19:5:159912379-159912400:+	GARNL3|84253	-0.642017	3.22e-05	0.0497741	hsa-mir-146a	ENSG00000136895	1	0	1	0	1	1	-0.543023
hg19:1:9211795-9211816:-	PTCH2|8643	-0.642017	3.22e-05	0.0497741	hsa-mir-34a	ENSG00000117425	0	0	1	0	0	1	-0.523089
hg19:12:7073276-7073296:+	COL22A1|169044	-0.642017	3.22e-05	0.0497741	hsa-mir-141	ENSG00000169436	0	0	1	1	0	1	-0.160899
hg19:17:28444148-28444172:+	SRM|6723	-0.642017	3.22e-05	0.0497741	hsa-mir-423	ENSG00000116649	0	1	0	0	1	1	-0.121048
hg19:12:7072910-7072927:+	FN1|2335	-0.641991	3.22e-05	0.0498102	hsa-mir-200c	ENSG00000115414	0	0	1	1	0	1	-0.277058
hg19:7:150935535-150935558:+	MAOA|4128	-0.641967	3.23e-05	0.0498414	hsa-mir-671	ENSG00000189221	0	0	1	0	0	1	0.0533428
hg19:8:22102488-22102508:-	MYO1D|4642	-0.641766	3.25e-05	0.0500039	hsa-mir-320a	ENSG00000176658	1	0	0	0	1	0	-0.182421
hg19:9:97847745-97847767:+	OPTN|10133	-0.641737	3.26e-05	0.0500039	hsa-mir-27b	ENSG00000123240	1	0	0	1	0	1	-0.380322
hg19:X:49767773-49767794:+	UBXN11|91544	-0.641737	3.26e-05	0.0500039	hsa-mir-532	ENSG00000158062	0	1	0	1	1	0	-0.261528
hg19:X:49767774-49767796:+	PLXNA4|91584	-0.641623	3.27e-05	0.050172	hsa-mir-532	ENSG00000221866	1	1	1	1	0	1	0.0334399
hg19:2:25551520-25551544:-	MYO18B|84700	-0.641622	3.27e-05	0.0501727	hsa-mir-1301	ENSG00000133454	0	0	1	0	0	1	-0.0708561
hg19:12:7073276-7073297:+	CMKLR1|1240	-0.641546	3.28e-05	0.0502581	hsa-mir-141	ENSG00000174600	1	1	0	1	1	1	-0.416724
hg19:12:7073277-7073298:+	SEC16B|89866	-0.641473	3.29e-05	0.0502581	hsa-mir-141	ENSG00000120341	0	0	1	0	1	1	-0.0406173
hg19:19:50004090-50004111:-	FAM186B|84070	-0.641457	3.29e-05	0.0502581	hsa-mir-150	ENSG00000135436	1	0	0	0	0	1	-0.465634
hg19:17:79099688-79099709:-	ARSB|411	-0.641457	3.29e-05	0.0502581	hsa-mir-338	ENSG00000113273	1	0	0	1	0	0	-0.389029
hg19:X:45606441-45606462:-	PRKAR2A|5576	-0.641457	3.29e-05	0.0502581	hsa-mir-222	ENSG00000114302	1	0	0	1	0	0	-0.144373
hg19:2:219267380-219267402:+	VDR|7421	-0.641457	3.29e-05	0.0502581	hsa-mir-26b	ENSG00000111424	1	0	0	1	1	0	-0.139604
hg19:12:7073320-7073339:+	PPFIBP2|8495	-0.641456	3.29e-05	0.0502581	hsa-mir-141	ENSG00000166387	0	0	1	0	0	1	-0.0508456
hg19:10:104196281-104196300:+	GRK5|2869	-0.64143	3.29e-05	0.0502923	hsa-mir-146b	ENSG00000198873	1	0	0	0	0	1	-0.375217
hg19:13:92002872-92002892:+	IKBKE|9641	-0.641261	3.31e-05	0.0504668	hsa-mir-17	ENSG00000263528	0	0	1	0	0	1	-0.0796952
hg19:19:52196522-52196545:+	H2AFV|94239	-0.641199	3.32e-05	0.0504668	hsa-mir-125a	ENSG00000105968	1	0	0	1	0	0	-0.138401
hg19:10:104196277-104196300:+	SLC22A23|63027	-0.641176	3.32e-05	0.0504668	hsa-mir-146b	ENSG00000137266	1	0	0	0	1	1	-0.579165
hg19:14:101512305-101512326:+	ZNF223|7766	-0.641176	3.32e-05	0.0504668	hsa-mir-381	ENSG00000178386	0	0	1	0	0	1	-0.322005
hg19:17:28444113-28444136:+	LFNG|3955	-0.641176	3.32e-05	0.0504668	hsa-mir-423	ENSG00000106003	1	0	1	0	0	1	-0.298804
hg19:1:155165028-155165047:+	NAA40|79829	-0.641176	3.32e-05	0.0504668	hsa-mir-92b	ENSG00000110583	1	0	1	0	1	1	-0.244628
hg19:16:69967045-69967064:+	KLHL36|79786	-0.641132	3.33e-05	0.0505396	hsa-mir-140	ENSG00000135686	0	1	0	0	0	1	-0.0416556
hg19:12:97885691-97885711:+	DCLK1|9201	-0.640896	3.36e-05	0.0506829	hsa-mir-1251	ENSG00000133083	0	1	0	0	0	1	-0.597684
hg19:12:7073318-7073342:+	SVEP1|79987	-0.640896	3.36e-05	0.0506829	hsa-mir-141	ENSG00000165124	0	0	1	1	0	1	-0.382376
hg19:7:130135967-130135989:+	MMP16|4325	-0.640896	3.36e-05	0.0506829	hsa-mir-335	ENSG00000156103	1	0	0	1	0	1	-0.327134
hg19:X:133680362-133680384:-	IL16|3603	-0.640818	3.37e-05	0.0508053	hsa-mir-503	ENSG00000172349	1	0	0	0	1	1	-0.117957
hg19:9:73424946-73424969:-	SLC34A2|10568	-0.640752	3.38e-05	0.050891	hsa-mir-204	ENSG00000157765	0	0	1	0	0	1	-0.550283
hg19:17:57918634-57918655:+	TDRD1|56165	-0.640699	3.38e-05	0.0509249	hsa-mir-21	ENSG00000095627	0	1	1	1	0	1	-0.237212
hg19:17:1617245-1617268:-	GPC3|2719	-0.640693	3.38e-05	0.0509249	hsa-mir-22	ENSG00000147257	1	0	0	0	1	1	0.0670389
hg19:10:105154058-105154079:-	VEGFA|7422	-0.640661	3.39e-05	0.0509249	hsa-mir-1307	ENSG00000112715	0	1	1	0	1	1	-0.164621
hg19:6:72113297-72113319:-	ARPC2|10109	-0.640616	3.39e-05	0.0509249	hsa-mir-30a	ENSG00000163466	1	0	1	0	0	1	-0.533536
hg19:9:97847745-97847767:+	ARNTL2|56938	-0.640616	3.39e-05	0.0509249	hsa-mir-27b	ENSG00000029153	1	0	1	0	0	1	-0.432081
hg19:9:131007024-131007045:-	FAM110C|642273	-0.640616	3.39e-05	0.0509249	hsa-mir-199b	ENSG00000184731	1	0	0	1	0	0	-0.373498
hg19:17:28444148-28444170:+	MRGPRF|116535	-0.640616	3.39e-05	0.0509249	hsa-mir-423	ENSG00000172935	0	1	0	1	1	0	-0.337168
hg19:6:72113255-72113278:-	LSP1|4046	-0.640616	3.39e-05	0.0509249	hsa-mir-30a	ENSG00000130592	0	1	0	0	1	0	-0.325431
hg19:14:65937834-65937854:+	DNAJB12|54788	-0.640497	3.41e-05	0.0510702	hsa-mir-625	ENSG00000148719	1	0	0	1	0	0	-0.079332
hg19:9:116971729-116971750:+	SYT13|57586	-0.640372	3.43e-05	0.0511743	hsa-mir-455	ENSG00000019505	1	0	0	1	0	1	-0.097334
hg19:12:7073276-7073297:+	PRELP|5549	-0.640286	3.44e-05	0.0512466	hsa-mir-141	ENSG00000188783	1	0	0	1	0	0	-0.440292
hg19:5:148441938-148441958:-	C14orf93|60686	-0.640191	3.45e-05	0.051385	hsa-mir-584	ENSG00000100802	0	0	1	0	0	1	-0.0464195
hg19:19:13985540-13985561:+	IL10RA|3587	-0.640118	3.46e-05	0.0514282	hsa-mir-181c	ENSG00000110324	1	1	1	1	0	0	-0.26372
hg19:14:102026699-102026721:-	PLEKHN1|84069	-0.64009	3.46e-05	0.0514282	hsa-mir-1247	ENSG00000187583	1	0	1	0	0	1	0.00872071
hg19:17:79099688-79099709:-	IGSF3|3321	-0.640056	3.47e-05	0.0514282	hsa-mir-338	ENSG00000143061	0	0	1	0	0	1	-0.46773
hg19:10:104196276-104196300:+	PPP2R1B|5519	-0.640056	3.47e-05	0.0514282	hsa-mir-146b	ENSG00000262764	1	0	1	0	0	1	-0.379866
hg19:19:50004089-50004111:-	OBSL1|23363	-0.640056	3.47e-05	0.0514282	hsa-mir-150	ENSG00000124006	1	0	1	1	0	1	-0.306715
hg19:17:1617207-1617230:-	RFTN1|23180	-0.640056	3.47e-05	0.0514282	hsa-mir-22	ENSG00000131378	1	0	0	1	0	1	-0.300839
hg19:3:188406623-188406644:+	MAPK10|5602	-0.640056	3.47e-05	0.0514282	hsa-mir-28	ENSG00000109339	0	1	0	0	1	0	-0.123886
hg19:10:104196277-104196299:+	CUX2|23316	-0.639832	3.49e-05	0.0516705	hsa-mir-146b	ENSG00000111249	0	0	1	0	1	1	-0.564929
hg19:7:130136002-130136025:+	LPAR1|1902	-0.639776	3.5e-05	0.0516705	hsa-mir-335	ENSG00000198121	1	1	0	1	0	0	-0.307272
hg19:5:159912379-159912400:+	C6orf70|55780	-0.639776	3.5e-05	0.0516705	hsa-mir-146a	ENSG00000130023	0	0	1	0	1	1	-0.295254
hg19:21:17912157-17912178:+	UBASH3B|84959	-0.639776	3.5e-05	0.0516705	hsa-let-7c	ENSG00000154127	1	0	0	0	0	1	-0.24447
hg19:17:1953227-1953245:-	ITPR3|3710	-0.639566	3.53e-05	0.0519258	hsa-mir-132	ENSG00000096433	0	0	1	0	0	1	-0.0436452
hg19:1:41223011-41223032:+	TTN|7273	-0.639556	3.53e-05	0.0519258	hsa-mir-30c-1	ENSG00000155657	1	0	1	1	0	1	0.0452744
hg19:5:148810224-148810246:+	CAPN8|388743	-0.639541	3.53e-05	0.0519258	hsa-mir-145	ENSG00000203697	1	0	0	0	0	1	-0.387869
hg19:10:105154058-105154079:-	ITGA2B|3674	-0.639541	3.53e-05	0.0519258	hsa-mir-1307	ENSG00000005961	0	0	1	0	0	1	-0.225917
hg19:11:64658631-64658653:-	GALNT5|11227	-0.639541	3.53e-05	0.0519258	hsa-mir-192	ENSG00000136542	0	1	1	1	0	1	-0.177804
hg19:6:72086708-72086729:-	EPSTI1|94240	-0.639496	3.54e-05	0.0519258	hsa-mir-30c-2	ENSG00000133106	0	1	1	1	0	0	-0.420138
hg19:21:17911421-17911443:+	PSTPIP2|9050	-0.639496	3.54e-05	0.0519258	hsa-mir-99a	ENSG00000152229	1	0	0	0	0	1	-0.265019
hg19:17:46657268-46657287:-	PCYOX1|51449	-0.63944	3.55e-05	0.0519937	hsa-mir-10a	ENSG00000116005	1	0	0	0	1	0	-0.0868456
hg19:X:118780728-118780748:-	BSCL2|26580	-0.639356	3.56e-05	0.0521176	hsa-mir-766	ENSG00000168000	0	1	1	0	1	1	-0.0787519
hg19:17:6921297-6921318:-	NMBR|4829	-0.639326	3.56e-05	0.0521355	hsa-mir-497	ENSG00000135577	0	0	1	0	0	1	-0.0707609
hg19:9:97847547-97847568:+	TCP11L1|55346	-0.63926	3.57e-05	0.0521355	hsa-mir-23b	ENSG00000176148	1	0	1	1	1	0	-0.390993
hg19:X:151127056-151127077:-	AQP2|359	-0.639257	3.57e-05	0.0521355	hsa-mir-224	ENSG00000167580	1	0	0	1	0	0	-0.0332558
hg19:10:104196277-104196296:+	PHKB|5257	-0.639216	3.58e-05	0.0521355	hsa-mir-146b	ENSG00000102893	1	0	1	1	0	1	-0.716199
hg19:5:136983270-136983293:-	A4GALT|53947	-0.639216	3.58e-05	0.0521355	hsa-mir-874	ENSG00000128274	0	0	1	1	0	1	-0.512043
hg19:X:146318463-146318484:-	NAV1|89796	-0.639216	3.58e-05	0.0521355	hsa-mir-508	ENSG00000134369	1	0	1	1	0	1	-0.0437701
hg19:14:101521801-101521823:+	DLG3|1741	-0.639109	3.59e-05	0.052285	hsa-mir-485	ENSG00000082458	1	0	1	0	0	1	-0.12076
hg19:11:72326151-72326169:-	PDGFRL|5157	-0.639086	3.59e-05	0.0523212	hsa-mir-139	ENSG00000104213	0	0	1	0	0	1	0.0129358
hg19:5:148810224-148810242:+	PRDM16|63976	-0.639047	3.6e-05	0.0523775	hsa-mir-145	ENSG00000142611	1	0	1	1	0	1	0.108277
hg19:6:72086708-72086729:-	IL12RB1|3594	-0.638936	3.61e-05	0.0524018	hsa-mir-30c-2	ENSG00000096996	1	0	0	1	0	0	-0.375056
hg19:11:64658674-64658696:-	CILP|8483	-0.638936	3.61e-05	0.0524018	hsa-mir-192	ENSG00000138615	1	0	1	1	0	1	-0.187174
hg19:5:148441936-148441958:-	SHROOM4|57477	-0.638936	3.61e-05	0.0524018	hsa-mir-584	ENSG00000158352	0	1	0	0	0	1	-0.130673
hg19:9:73424946-73424969:-	MGAT3|4248	-0.638868	3.62e-05	0.0525021	hsa-mir-204	ENSG00000128268	1	0	0	1	0	0	-0.398842
hg19:17:1617209-1617230:-	KLHL15|80311	-0.63884	3.63e-05	0.0525297	hsa-mir-22	ENSG00000174010	1	0	0	0	1	0	-0.296111
hg19:14:101506606-101506628:+	PHC3|80012	-0.638806	3.63e-05	0.0525696	hsa-mir-654	ENSG00000173889	0	0	1	0	0	1	-0.0514454
hg19:5:148808541-148808562:+	ZNF223|7766	-0.638745	3.64e-05	0.05261	hsa-mir-143	ENSG00000178386	0	0	1	0	0	1	-0.226542
hg19:22:38243740-38243761:-	WDR90|197335	-0.638645	3.65e-05	0.0526231	hsa-mir-659	ENSG00000161996	0	0	1	0	0	1	-0.00446521
hg19:10:104196276-104196297:+	ZNF536|9745	-0.638569	3.66e-05	0.0527426	hsa-mir-146b	ENSG00000198597	0	0	1	0	1	1	-0.389444
hg19:9:127454796-127454816:+	MRPL35|51318	-0.638375	3.69e-05	0.052885	hsa-mir-181a-2	ENSG00000132313	0	0	1	1	0	0	-0.331733
hg19:7:130561507-130561530:-	DOCK4|9732	-0.638375	3.69e-05	0.052885	hsa-mir-29a	ENSG00000128512	0	0	1	0	1	1	-0.268471
hg19:7:130562231-130562250:-	SLC12A1|6557	-0.638212	3.71e-05	0.0531042	hsa-mir-29b-1	ENSG00000074803	1	0	1	0	0	1	-0.133273
hg19:17:57918635-57918657:+	SYNM|23336	-0.638095	3.73e-05	0.0531084	hsa-mir-21	ENSG00000182253	1	0	0	0	0	1	-0.556122
hg19:1:155165028-155165047:+	BTBD11|121551	-0.638095	3.73e-05	0.0531084	hsa-mir-92b	ENSG00000151136	1	0	1	0	0	1	-0.340888
hg19:11:64658674-64658696:-	FBN1|2200	-0.638095	3.73e-05	0.0531084	hsa-mir-192	ENSG00000166147	1	0	1	1	0	1	-0.153991
hg19:5:148441937-148441958:-	LRRK2|120892	-0.638095	3.73e-05	0.0531084	hsa-mir-584	ENSG00000188906	1	0	1	0	0	1	-0.100519
hg19:1:209605511-209605533:+	STRADB|55437	-0.638095	3.73e-05	0.0531084	hsa-mir-205	ENSG00000082146	1	0	1	1	0	1	0.0356973
hg19:5:148810225-148810247:+	IFIH1|64135	-0.637892	3.75e-05	0.0533259	hsa-mir-145	ENSG00000115267	0	0	1	0	0	1	-0.18915
hg19:14:102026699-102026721:-	SSH3|54961	-0.637848	3.76e-05	0.0533259	hsa-mir-1247	ENSG00000172830	0	1	0	0	0	1	-0.150148
hg19:X:45606442-45606463:-	SLC1A2|6506	-0.637815	3.77e-05	0.0533259	hsa-mir-222	ENSG00000110436	1	0	0	1	0	0	-0.396043
hg19:X:45606439-45606463:-	PITPNM2|57605	-0.637815	3.77e-05	0.0533259	hsa-mir-222	ENSG00000090975	0	0	1	1	0	0	-0.231327
hg19:17:57918617-57918634:+	WDR72|256764	-0.637815	3.77e-05	0.0533259	hsa-mir-21	ENSG00000166415	0	1	0	1	1	0	-0.206412
hg19:5:159912378-159912401:+	GJC1|10052	-0.637571	3.8e-05	0.0535981	hsa-mir-146a	ENSG00000182963	1	0	0	1	0	0	-0.113489
hg19:16:67236230-67236252:-	MEGF6|1953	-0.637535	3.8e-05	0.0535981	hsa-mir-328	ENSG00000162591	0	0	1	1	0	1	-0.452987
hg19:21:17962609-17962632:+	XDH|7498	-0.637535	3.8e-05	0.0535981	hsa-mir-125b-2	ENSG00000158125	0	0	1	0	0	1	-0.304216
hg19:9:97847745-97847766:+	UBASH3B|84959	-0.637535	3.8e-05	0.0535981	hsa-mir-27b	ENSG00000154127	0	0	1	1	0	1	-0.300768
hg19:7:129410287-129410311:-	UBE2G2|7327	-0.63744	3.82e-05	0.0537163	hsa-mir-182	ENSG00000184787	1	0	1	1	0	1	-0.151918
hg19:10:53059348-53059370:+	RSPO4|343637	-0.637374	3.83e-05	0.053812	hsa-mir-605	ENSG00000101282	1	0	0	1	0	0	-0.132491
hg19:12:7073276-7073297:+	CDK6|1021	-0.637344	3.83e-05	0.0538235	hsa-mir-141	ENSG00000105810	1	0	0	1	0	0	-0.276375
hg19:10:132760901-132760921:-	CPNE1|8904	-0.637324	3.83e-05	0.0538235	hsa-mir-378c	ENSG00000214078	1	0	1	0	0	1	-0.0588302
hg19:17:57918673-57918694:+	SCAP|22937	-0.637255	3.84e-05	0.0538235	hsa-mir-21	ENSG00000114650	0	1	1	1	0	1	-0.417307
hg19:X:85158644-85158668:-	KCND1|3750	-0.637255	3.84e-05	0.0538235	hsa-mir-361	ENSG00000102057	1	0	0	0	1	0	-0.242519
hg19:2:207974765-207974788:-	MTF2|22823	-0.637227	3.85e-05	0.0538674	hsa-mir-2355	ENSG00000143033	1	0	0	0	1	1	0.0307513
hg19:14:101500141-101500164:+	NOD1|10392	-0.637204	3.85e-05	0.0539063	hsa-mir-495	ENSG00000106100	1	0	1	1	0	0	-0.0781147
hg19:17:57918616-57918634:+	NARG2|79664	-0.637159	3.86e-05	0.0539634	hsa-mir-21	ENSG00000128915	1	0	1	1	0	0	-0.149032
hg19:5:136983271-136983293:-	CD276|80381	-0.636975	3.88e-05	0.054084	hsa-mir-874	ENSG00000103855	1	0	1	1	1	1	-0.506306
hg19:5:148810224-148810245:+	CC2D1B|200014	-0.636975	3.88e-05	0.054084	hsa-mir-145	ENSG00000154222	1	0	0	1	0	1	-0.448654
hg19:X:133680673-133680695:-	C11orf24|53838	-0.636975	3.88e-05	0.054084	hsa-mir-424	ENSG00000171067	0	0	1	1	0	0	-0.29468
hg19:9:131007024-131007045:-	NIPAL3|57185	-0.636975	3.88e-05	0.054084	hsa-mir-199b	ENSG00000001461	1	0	0	1	0	0	-0.182482
hg19:9:97847745-97847767:+	PLOD3|8985	-0.636975	3.88e-05	0.054084	hsa-mir-27b	ENSG00000106397	0	0	1	0	0	1	-0.0808442
hg19:9:97847549-97847568:+	FAM124A|220108	-0.63695	3.89e-05	0.0541225	hsa-mir-23b	ENSG00000150510	1	0	0	1	0	0	-0.220467
hg19:19:52196521-52196537:+	TOP3A|7156	-0.636939	3.89e-05	0.0541393	hsa-mir-125a	ENSG00000177302	1	1	1	1	1	1	0.0281413
hg19:17:57918634-57918657:+	C9orf9|11092	-0.636918	3.89e-05	0.05417	hsa-mir-21	ENSG00000165698	0	1	0	0	0	1	-0.480523
hg19:7:99691443-99691461:-	GPR65|8477	-0.63682	3.91e-05	0.0542949	hsa-mir-93	ENSG00000140030	1	0	0	0	1	0	-0.000441954
hg19:15:89151352-89151374:+	RARS|5917	-0.636788	3.91e-05	0.0543086	hsa-mir-1179	ENSG00000113643	1	1	1	0	0	1	-0.16299
hg19:9:97847547-97847568:+	CDKN2B|1030	-0.636739	3.92e-05	0.0543086	hsa-mir-23b	ENSG00000147883	1	0	0	1	0	0	-0.368889
hg19:9:97847787-97847808:+	RIN3|79890	-0.636739	3.92e-05	0.0543086	hsa-mir-27b	ENSG00000100599	1	0	1	0	0	1	-0.134712
hg19:10:105154056-105154080:-	ERG|2078	-0.636695	3.92e-05	0.0543086	hsa-mir-1307	ENSG00000157554	0	1	1	0	1	0	-0.308769
hg19:1:110141562-110141583:+	MLLT6|4302	-0.636695	3.92e-05	0.0543086	hsa-mir-197	ENSG00000108292	1	0	1	1	0	1	-0.251597
hg19:22:20020676-20020699:+	ADAM23|8745	-0.636695	3.92e-05	0.0543086	hsa-mir-185	ENSG00000114948	1	0	0	1	1	1	-0.191103
hg19:10:105154058-105154080:-	PDIA3|2923	-0.636695	3.92e-05	0.0543086	hsa-mir-1307	ENSG00000167004	1	0	1	1	0	0	-0.0419297
hg19:5:85916361-85916384:+	MTF2|22823	-0.63657	3.94e-05	0.0544913	hsa-mir-3607	ENSG00000143033	1	0	0	0	0	1	-0.104145
hg19:3:47891098-47891120:+	DNAH10|196385	-0.636562	3.94e-05	0.0545048	hsa-mir-1226	ENSG00000197653	0	0	1	0	0	1	0.0882739
hg19:1:209605511-209605531:+	IMPG1|3617	-0.636478	3.96e-05	0.0545849	hsa-mir-205	ENSG00000112706	1	0	0	1	0	1	-0.0102824
hg19:6:72113260-72113279:-	FAM72A|729533	-0.636459	3.96e-05	0.0545849	hsa-mir-30a	ENSG00000263687	0	0	1	0	0	1	-0.184585
hg19:9:97847787-97847808:+	FAM118B|79607	-0.636459	3.96e-05	0.0545849	hsa-mir-27b	ENSG00000197798	0	0	1	0	1	0	-0.0818633
hg19:14:101506606-101506628:+	SPG11|80208	-0.636418	3.96e-05	0.0545849	hsa-mir-654	ENSG00000104133	1	0	1	0	0	1	0.0803603
hg19:10:104196277-104196297:+	AAK1|22848	-0.636415	3.96e-05	0.0545849	hsa-mir-146b	ENSG00000115977	0	0	1	0	0	1	-0.465208
hg19:X:45605611-45605631:-	NEB|4703	-0.636415	3.96e-05	0.0545849	hsa-mir-221	ENSG00000183091	0	0	1	0	0	1	-0.355497
hg19:X:45606441-45606462:-	GNS|2799	-0.636415	3.96e-05	0.0545849	hsa-mir-222	ENSG00000135677	1	0	0	1	0	0	-0.342333
hg19:19:52196091-52196111:+	DOCK8|81704	-0.636415	3.96e-05	0.0545849	hsa-let-7e	ENSG00000107099	1	1	1	0	1	1	-0.299458
hg19:19:50004089-50004111:-	DUOXA1|90527	-0.636415	3.96e-05	0.0545849	hsa-mir-150	ENSG00000140254	1	0	1	0	1	0	-0.244007
hg19:3:188406622-188406643:+	DISP1|84976	-0.636415	3.96e-05	0.0545849	hsa-mir-28	ENSG00000154309	0	0	1	0	1	0	-0.146741
hg19:15:52569365-52569386:-	FAM189A1|23359	-0.636402	3.97e-05	0.0545956	hsa-mir-1266	ENSG00000104059	0	0	1	1	0	0	-0.145769
hg19:1:207975838-207975859:-	KBTBD8|84541	-0.636394	3.97e-05	0.0546091	hsa-mir-29b-2	ENSG00000163376	0	1	1	1	0	0	-0.0128117
hg19:1:41220044-41220066:+	CENPW|387103	-0.636319	3.98e-05	0.0547093	hsa-mir-30e	ENSG00000203760	1	0	0	0	0	1	-0.187624
hg19:11:64658631-64658653:-	PTGFRN|5738	-0.636319	3.98e-05	0.0547093	hsa-mir-192	ENSG00000134247	0	0	1	0	0	1	-0.187174
hg19:7:99691440-99691460:-	EXOC7|23265	-0.636193	4e-05	0.0548281	hsa-mir-93	ENSG00000182473	0	0	1	1	0	1	-0.00539943
hg19:17:46657265-46657287:-	CCDC90B|60492	-0.636166	4e-05	0.0548281	hsa-mir-10a	ENSG00000137500	1	0	0	1	1	1	-0.00263789
hg19:X:49773613-49773635:+	PLEKHA5|54477	-0.636137	4.01e-05	0.0548281	hsa-mir-362	ENSG00000052126	1	0	0	0	0	1	-0.0794378
hg19:5:148808541-148808564:+	PSG1|5669	-0.636134	4.01e-05	0.0548281	hsa-mir-143	ENSG00000231924	0	1	0	0	0	1	-0.294182
hg19:1:155165028-155165048:+	MGAT1|4245	-0.636134	4.01e-05	0.0548281	hsa-mir-92b	ENSG00000131446	0	1	1	0	1	0	-0.252982
hg19:7:5535504-5535526:-	PDE7B|27115	-0.636134	4.01e-05	0.0548281	hsa-mir-589	ENSG00000171408	0	0	1	1	0	0	-0.248985
hg19:10:105154056-105154079:-	USHBP1|83878	-0.636134	4.01e-05	0.0548281	hsa-mir-1307	ENSG00000130307	1	0	1	0	0	1	-0.17856
hg19:11:72326110-72326133:-	ZNF707|286075	-0.636134	4.01e-05	0.0548281	hsa-mir-139	ENSG00000261516	0	1	0	0	1	0	-0.0927922
hg19:19:13947323-13947343:-	POGK|57645	-0.636134	4.01e-05	0.0548281	hsa-mir-27a	ENSG00000143157	1	0	1	1	0	0	0.118742
hg19:5:58999492-58999514:-	ABCG5|64240	-0.63612	4.01e-05	0.0548472	hsa-mir-582	ENSG00000138075	1	0	1	0	0	1	-0.0105072
hg19:10:105154058-105154079:-	SOBP|55084	-0.636039	4.02e-05	0.0549721	hsa-mir-1307	ENSG00000112320	0	1	0	0	0	1	-0.270737
hg19:14:101340890-101340911:+	ZDHHC23|254887	-0.635912	4.04e-05	0.0550935	hsa-mir-337	ENSG00000184307	1	0	1	1	1	0	-0.0864091
hg19:17:57918633-57918656:+	GIPC3|126326	-0.635854	4.05e-05	0.0550935	hsa-mir-21	ENSG00000179855	1	0	0	1	0	0	-0.536594
hg19:8:135817122-135817144:-	CELF2|10659	-0.635854	4.05e-05	0.0550935	hsa-mir-30d	ENSG00000048740	1	0	1	1	0	0	-0.500952
hg19:10:105154056-105154079:-	LGI4|163175	-0.635854	4.05e-05	0.0550935	hsa-mir-1307	ENSG00000153902	0	1	0	0	0	1	-0.355538
hg19:7:99691195-99691216:-	SLC29A2|3177	-0.635854	4.05e-05	0.0550935	hsa-mir-25	ENSG00000174669	1	0	1	0	1	0	-0.331302
hg19:2:219267380-219267402:+	ARSB|411	-0.635854	4.05e-05	0.0550935	hsa-mir-26b	ENSG00000113273	1	0	0	1	1	1	-0.267803
hg19:17:57918634-57918656:+	C17orf102|400591	-0.635849	4.05e-05	0.0551002	hsa-mir-21	ENSG00000197322	1	0	0	1	0	0	-0.180286
hg19:17:1953583-1953605:-	SDHA|6389	-0.635708	4.07e-05	0.0552956	hsa-mir-212	ENSG00000073578	0	0	1	0	0	1	-0.207371
hg19:5:179442362-179442383:-	COPS7B|64708	-0.635619	4.08e-05	0.055331	hsa-mir-340	ENSG00000144524	1	0	0	0	0	1	0.0384638
hg19:14:101488408-101488426:+	KIAA1191|57179	-0.635589	4.09e-05	0.055331	hsa-mir-379	ENSG00000122203	1	0	0	0	0	1	-0.0756879
hg19:7:129410285-129410311:-	ADAMTSL3|57188	-0.635574	4.09e-05	0.055331	hsa-mir-182	ENSG00000156218	0	0	1	0	0	1	-0.139855
hg19:5:148810262-148810284:+	DPCR1|135656	-0.635574	4.09e-05	0.055331	hsa-mir-145	ENSG00000257232	0	0	1	0	0	1	-0.108503
hg19:1:207975245-207975269:-	NPAS4|266743	-0.635546	4.09e-05	0.055374	hsa-mir-29c	ENSG00000174576	1	0	0	1	0	1	-0.175869
hg19:12:7073276-7073297:+	PRCP|5547	-0.635523	4.1e-05	0.0554093	hsa-mir-141	ENSG00000137509	1	1	1	1	0	0	-0.310663
hg19:2:177015057-177015079:+	NAA16|79612	-0.635479	4.1e-05	0.0554734	hsa-mir-10b	ENSG00000172766	1	0	0	0	0	1	-0.0285279
hg19:10:104196283-104196301:+	WNT4|54361	-0.635294	4.13e-05	0.0556031	hsa-mir-146b	ENSG00000162552	0	1	0	0	0	1	-0.559745
hg19:17:46114540-46114561:-	HPN|3249	-0.635294	4.13e-05	0.0556031	hsa-mir-152	ENSG00000105707	0	1	0	0	0	1	-0.383791
hg19:X:133680710-133680732:-	LTBP1|4052	-0.635294	4.13e-05	0.0556031	hsa-mir-424	ENSG00000049323	1	0	0	1	0	1	-0.254123
hg19:3:188406623-188406645:+	RERE|473	-0.635294	4.13e-05	0.0556031	hsa-mir-28	ENSG00000142599	0	1	0	1	0	1	-0.200909
hg19:X:85158647-85158669:-	CLDN2|9075	-0.635294	4.13e-05	0.0556031	hsa-mir-361	ENSG00000165376	1	0	0	1	1	0	-0.196117
hg19:5:148441935-148441958:-	SNX25|83891	-0.635274	4.13e-05	0.0556347	hsa-mir-584	ENSG00000109762	1	0	1	0	0	1	-0.127379
hg19:7:129410287-129410307:-	SSTR3|6753	-0.635161	4.15e-05	0.0558064	hsa-mir-182	ENSG00000183473	1	0	0	0	1	0	-0.0635191
hg19:7:25989542-25989565:-	CIRH1A|84916	-0.635103	4.16e-05	0.0558672	hsa-mir-148a	ENSG00000141076	1	0	0	0	0	1	-0.0975603
hg19:11:79113077-79113097:-	SEPT9|10801	-0.635058	4.17e-05	0.0558672	hsa-mir-708	ENSG00000184640	0	0	1	1	0	0	-0.0187008
hg19:X:45606442-45606463:-	SORBS2|8470	-0.635014	4.17e-05	0.0558672	hsa-mir-222	ENSG00000154556	0	0	1	1	0	1	-0.540282
hg19:3:188406582-188406603:+	SCNN1D|6339	-0.635014	4.17e-05	0.0558672	hsa-mir-28	ENSG00000162572	0	1	1	0	0	1	-0.289639
hg19:13:50623305-50623325:-	UBR4|23352	-0.635014	4.17e-05	0.0558672	hsa-mir-15a	ENSG00000127481	0	0	1	0	1	1	-0.127214
hg19:5:148441937-148441958:-	PAPOLG|64895	-0.635014	4.17e-05	0.0558672	hsa-mir-584	ENSG00000115421	1	0	0	1	0	1	0.0325986
hg19:14:101340891-101340912:+	CLCN2|1181	-0.634963	4.18e-05	0.0559424	hsa-mir-337	ENSG00000114859	0	1	1	0	1	1	-0.347158
hg19:12:7073276-7073297:+	FHL2|2274	-0.634823	4.2e-05	0.0561361	hsa-mir-141	ENSG00000115641	1	0	0	1	0	0	-0.127602
hg19:7:25989542-25989559:-	CHST2|9435	-0.634759	4.21e-05	0.0561397	hsa-mir-148a	ENSG00000175040	0	1	0	0	0	1	-0.113498
hg19:10:132760901-132760921:-	PGPEP1|54858	-0.634753	4.21e-05	0.0561397	hsa-mir-378c	ENSG00000130517	1	0	0	1	1	1	-0.07707
hg19:X:133680673-133680695:-	STK17A|9263	-0.634734	4.22e-05	0.0561397	hsa-mir-424	ENSG00000164543	1	0	0	0	0	1	-0.277886
hg19:17:46657266-46657288:-	ZNF582|147948	-0.634734	4.22e-05	0.0561397	hsa-mir-10a	ENSG00000018869	1	1	1	0	0	1	-0.233181
hg19:7:25989542-25989561:-	IFNE|338376	-0.634707	4.22e-05	0.0561783	hsa-mir-148a	ENSG00000184995	0	0	1	0	1	0	-0.169894
hg19:20:57392681-57392702:-	DGCR2|9993	-0.634669	4.23e-05	0.0562422	hsa-mir-296	ENSG00000070413	1	1	1	1	1	1	-0.0960329
hg19:10:104196280-104196299:+	COL17A1|1308	-0.634632	4.23e-05	0.0562768	hsa-mir-146b	ENSG00000065618	1	0	0	0	0	1	-0.270804
hg19:7:129410287-129410307:-	ZNF227|7770	-0.634554	4.24e-05	0.0564025	hsa-mir-182	ENSG00000131115	0	0	1	1	0	1	0.0204754
hg19:1:41220043-41220063:+	ITGB6|3694	-0.634454	4.26e-05	0.0564099	hsa-mir-30e	ENSG00000115221	1	0	1	1	1	1	-0.349434
hg19:17:6920985-6921007:-	CATSPER2|117155	-0.634454	4.26e-05	0.0564099	hsa-mir-195	ENSG00000166762	1	0	1	0	0	1	-0.28235
hg19:X:49767773-49767794:+	ADAM11|4185	-0.634454	4.26e-05	0.0564099	hsa-mir-532	ENSG00000073670	1	0	0	1	0	1	-0.246176
hg19:X:133675395-133675416:-	SESN2|83667	-0.634454	4.26e-05	0.0564099	hsa-mir-542	ENSG00000130766	1	0	0	0	0	1	-0.105161
hg19:19:50004089-50004111:-	PNMA5|114824	-0.634356	4.27e-05	0.0565488	hsa-mir-150	ENSG00000198883	0	0	1	0	0	1	-0.047756
hg19:5:148808542-148808560:+	ZNF174|7727	-0.634276	4.29e-05	0.0566634	hsa-mir-143	ENSG00000103343	0	0	1	0	0	1	-0.0151726
hg19:X:45606443-45606463:-	LPP|4026	-0.634218	4.3e-05	0.0566634	hsa-mir-222	ENSG00000145012	1	0	0	1	0	0	-0.179802
hg19:16:69967045-69967062:+	ZSCAN2|54993	-0.634179	4.3e-05	0.0566634	hsa-mir-140	ENSG00000176371	1	0	0	1	0	1	-0.0166851
hg19:5:136983271-136983293:-	CHPF2|54480	-0.634174	4.3e-05	0.0566634	hsa-mir-874	ENSG00000033100	0	1	1	1	0	0	-0.491125
hg19:1:110141562-110141583:+	EFHC1|114327	-0.634174	4.3e-05	0.0566634	hsa-mir-197	ENSG00000096093	1	0	0	0	0	1	-0.407001
hg19:19:52196521-52196541:+	SIRPA|140885	-0.634174	4.3e-05	0.0566634	hsa-mir-125a	ENSG00000198053	1	0	1	1	0	1	-0.268396
hg19:17:57918635-57918656:+	CEP68|23177	-0.634174	4.3e-05	0.0566634	hsa-mir-21	ENSG00000011523	0	1	1	1	0	0	-0.19758
hg19:17:28444149-28444171:+	ROBO3|64221	-0.634174	4.3e-05	0.0566634	hsa-mir-423	ENSG00000154134	0	0	1	0	1	1	-0.18248
hg19:11:122022990-122023005:-	VWDE|221806	-0.634157	4.31e-05	0.0566872	hsa-mir-100	ENSG00000146530	1	0	0	0	0	1	-0.0322859
hg19:7:25989543-25989561:-	CHRFAM7A|89832	-0.634147	4.31e-05	0.0567048	hsa-mir-148a	ENSG00000166664	1	1	1	0	0	1	-0.0488435
hg19:19:13947103-13947123:-	SNAP91|9892	-0.634122	4.31e-05	0.0567453	hsa-mir-24-2	ENSG00000065609	1	0	0	0	0	1	-0.127273
hg19:5:148808540-148808557:+	ZNF136|7695	-0.634087	4.32e-05	0.0568038	hsa-mir-143	ENSG00000196646	0	1	0	1	0	0	-0.0136086
hg19:17:57918616-57918634:+	RIMBP2|23504	-0.634078	4.32e-05	0.0568038	hsa-mir-21	ENSG00000060709	0	0	1	1	0	0	-0.379085
hg19:22:20073595-20073614:+	ARSF|416	-0.634024	4.33e-05	0.0568911	hsa-mir-1306	ENSG00000062096	0	1	0	0	0	1	-0.013879
hg19:9:97848307-97848329:+	ARHGAP32|9743	-0.633938	4.34e-05	0.0569143	hsa-mir-24-1	ENSG00000134909	0	1	0	1	0	0	-0.274027
hg19:6:72113257-72113277:-	ETV6|2120	-0.633894	4.35e-05	0.0569143	hsa-mir-30a	ENSG00000139083	1	0	0	0	0	1	-0.465107
hg19:1:155165028-155165047:+	POFUT2|23275	-0.633894	4.35e-05	0.0569143	hsa-mir-92b	ENSG00000186866	1	0	0	1	0	0	-0.219451
hg19:12:7073276-7073298:+	FGF7|2252	-0.633894	4.35e-05	0.0569143	hsa-mir-141	ENSG00000140285	1	0	0	1	0	0	-0.199764
hg19:X:49767773-49767794:+	RND2|8153	-0.633894	4.35e-05	0.0569143	hsa-mir-532	ENSG00000108830	1	0	0	0	0	1	-0.140523
hg19:14:101531978-101531999:+	ERCC5|2073	-0.633842	4.36e-05	0.0570007	hsa-mir-369	ENSG00000134899	0	1	0	0	1	0	-0.0552935
hg19:5:148810262-148810283:+	FIGNL1|63979	-0.633757	4.37e-05	0.0571175	hsa-mir-145	ENSG00000132436	0	0	1	1	0	1	-0.294936
hg19:17:1617209-1617230:-	SLC22A5|6584	-0.633658	4.38e-05	0.0571365	hsa-mir-22	ENSG00000197375	1	0	0	1	0	1	-0.332617
hg19:17:57918616-57918634:+	BHLHB9|80823	-0.633658	4.38e-05	0.0571365	hsa-mir-21	ENSG00000198908	1	0	0	0	0	1	-0.257787
hg19:17:46114541-46114561:-	NIF3L1|60491	-0.633658	4.38e-05	0.0571365	hsa-mir-152	ENSG00000196290	0	1	0	0	1	0	-0.0744843
hg19:9:116971729-116971750:+	CRB1|23418	-0.633634	4.39e-05	0.0571365	hsa-mir-455	ENSG00000134376	1	0	0	1	0	1	0.00383249
hg19:10:104196277-104196295:+	IRAK1|3654	-0.633613	4.39e-05	0.0571365	hsa-mir-146b	ENSG00000184216	1	0	1	1	0	1	-0.618374
hg19:17:6920985-6921007:-	FAM92A1|137392	-0.633613	4.39e-05	0.0571365	hsa-mir-195	ENSG00000188343	1	0	0	0	1	1	-0.314624
hg19:19:52195872-52195893:+	SETBP1|26040	-0.633613	4.39e-05	0.0571365	hsa-mir-99b	ENSG00000152217	0	0	1	1	0	0	-0.103526
hg19:7:130136003-130136024:+	FNDC1|84624	-0.633613	4.39e-05	0.0571365	hsa-mir-335	ENSG00000164694	0	0	1	0	0	1	-0.0494228
hg19:11:121970517-121970538:-	MYO16|23026	-0.633514	4.41e-05	0.0572876	hsa-mir-125b-1	ENSG00000041515	0	0	1	0	0	1	-0.0938425
hg19:10:100154991-100155011:-	STX3|6809	-0.633493	4.41e-05	0.0573162	hsa-mir-1287	ENSG00000166900	1	0	1	1	0	1	-0.0949752
hg19:8:135817125-135817144:-	HCN4|10021	-0.633345	4.43e-05	0.0573954	hsa-mir-30d	ENSG00000138622	1	0	0	0	0	1	-0.0252437
hg19:X:45606439-45606461:-	SH3TC2|79628	-0.633334	4.44e-05	0.0573954	hsa-mir-222	ENSG00000169247	1	1	1	0	1	0	0.00395755
hg19:14:100576011-100576035:+	EGR2|1959	-0.633291	4.44e-05	0.0574722	hsa-mir-342	ENSG00000122877	1	0	0	0	1	0	0.00366726
hg19:19:52195874-52195893:+	DNAJC10|54431	-0.633282	4.44e-05	0.0574889	hsa-mir-99b	ENSG00000077232	0	0	1	0	0	1	0.00337329
hg19:17:46114539-46114561:-	CA13|377677	-0.633238	4.45e-05	0.0575433	hsa-mir-152	ENSG00000185015	1	0	0	1	0	0	-0.272323
hg19:X:146341182-146341202:-	C9orf156|51531	-0.63318	4.46e-05	0.0576327	hsa-mir-509-3	ENSG00000136932	0	1	0	0	0	1	-0.139033
hg19:17:79099688-79099709:-	DSC2|1824	-0.633053	4.48e-05	0.0576566	hsa-mir-338	ENSG00000134755	1	0	0	1	0	1	-0.549189
hg19:8:135817163-135817184:-	RNF175|285533	-0.633053	4.48e-05	0.0576566	hsa-mir-30d	ENSG00000145428	1	0	1	1	0	1	-0.390138
hg19:17:28444113-28444136:+	PDLIM2|64236	-0.633053	4.48e-05	0.0576566	hsa-mir-423	ENSG00000120913	1	1	0	1	0	1	-0.164801
hg19:16:69967006-69967026:+	SAMD10|140700	-0.633032	4.49e-05	0.0576904	hsa-mir-140	ENSG00000130590	0	0	1	0	0	1	-0.0825725
hg19:19:52196560-52196580:+	UNK|85451	-0.633025	4.49e-05	0.0577017	hsa-mir-125a	ENSG00000132478	1	0	0	1	0	1	0.0467773
hg19:17:79099727-79099749:+	ACAT1|38	-0.633008	4.49e-05	0.0577323	hsa-mir-3065	ENSG00000075239	1	0	0	0	0	1	-0.222854
hg19:21:17912156-17912177:+	PARP9|83666	-0.632976	4.49e-05	0.0577879	hsa-let-7c	ENSG00000138496	0	0	1	0	0	1	-0.0695879
hg19:17:57918672-57918693:+	ANKS1B|56899	-0.632958	4.5e-05	0.057798	hsa-mir-21	ENSG00000185046	0	0	1	1	0	0	-0.409999
hg19:17:57918672-57918693:+	CBX1|10951	-0.632958	4.5e-05	0.057798	hsa-mir-21	ENSG00000108468	0	1	0	1	0	0	-0.38728
hg19:X:53583258-53583280:-	SCN2B|6327	-0.632947	4.5e-05	0.0578155	hsa-mir-98	ENSG00000149575	1	0	0	1	1	1	0.0168874
hg19:12:7073276-7073297:+	C1S|716	-0.632862	4.51e-05	0.0579162	hsa-mir-141	ENSG00000182326	0	1	0	0	1	0	-0.373022
hg19:5:159912380-159912401:+	ZNF185|7739	-0.63283	4.52e-05	0.0579162	hsa-mir-146a	ENSG00000147394	1	0	1	1	1	1	-0.113138
hg19:14:102026663-102026684:-	CSNK2A2|1459	-0.632817	4.52e-05	0.0579162	hsa-mir-1247	ENSG00000070770	1	0	0	1	0	0	-0.241451
hg19:12:7072905-7072928:+	FADS1|3992	-0.632817	4.52e-05	0.0579162	hsa-mir-200c	ENSG00000149485	0	1	0	1	1	0	0.0661996
hg19:10:104196277-104196301:+	TLN2|83660	-0.632773	4.53e-05	0.0579162	hsa-mir-146b	ENSG00000171914	0	0	1	1	0	0	-0.375268
hg19:X:45606441-45606462:-	PCNX|22990	-0.632773	4.53e-05	0.0579162	hsa-mir-222	ENSG00000100731	0	0	1	1	0	1	-0.164979
hg19:2:207974767-207974788:-	ZNF280D|54816	-0.632773	4.53e-05	0.0579162	hsa-mir-2355	ENSG00000137871	1	1	1	0	1	1	-0.0845958
hg19:19:52196522-52196545:+	HNRNPU|3192	-0.632772	4.53e-05	0.0579179	hsa-mir-125a	ENSG00000153187	0	0	1	0	0	1	0.0761193
hg19:2:219866370-219866392:-	CDRT1|374286	-0.632731	4.53e-05	0.0579897	hsa-mir-375	ENSG00000241322	0	0	1	1	0	0	-0.288502
hg19:14:101340891-101340912:+	FIP1L1|81608	-0.632722	4.54e-05	0.0580015	hsa-mir-337	ENSG00000145216	1	0	1	0	0	1	-0.219046
hg19:17:57918634-57918658:+	AOC3|8639	-0.632677	4.54e-05	0.0580646	hsa-mir-21	ENSG00000131471	1	0	1	0	1	0	-0.288823
hg19:14:31483913-31483934:-	ABCG5|64240	-0.632673	4.54e-05	0.0580652	hsa-mir-624	ENSG00000138075	0	1	0	0	1	1	-0.0742571
hg19:12:7073276-7073297:+	PDGFRA|5156	-0.632582	4.56e-05	0.0581884	hsa-mir-141	ENSG00000134853	0	0	1	1	0	1	-0.384145
hg19:17:28444115-28444137:+	FBN3|84467	-0.632571	4.56e-05	0.0581884	hsa-mir-423	ENSG00000142449	0	0	1	0	1	1	-0.0813001
hg19:6:72086707-72086729:-	LAT2|7462	-0.632493	4.57e-05	0.0581884	hsa-mir-30c-2	ENSG00000086730	1	0	0	0	1	0	-0.509976
hg19:1:9211795-9211816:-	QKI|9444	-0.632493	4.57e-05	0.0581884	hsa-mir-34a	ENSG00000112531	1	0	0	1	0	0	-0.36489
hg19:X:65238779-65238798:+	SGSM1|129049	-0.632493	4.57e-05	0.0581884	hsa-mir-223	ENSG00000167037	1	0	0	0	0	1	-0.364374
hg19:6:33665968-33665990:+	SEMA6B|10501	-0.632493	4.57e-05	0.0581884	hsa-mir-3934	ENSG00000167680	1	0	1	0	1	0	-0.22123
hg19:1:110141563-110141584:+	SLC10A5|347051	-0.632445	4.58e-05	0.0582652	hsa-mir-197	ENSG00000253598	0	1	0	0	0	1	0.0326877
hg19:7:130135967-130135987:+	ALS2CL|259173	-0.632398	4.59e-05	0.0583264	hsa-mir-335	ENSG00000178038	1	0	0	1	0	1	-0.0855923
hg19:17:28444113-28444137:+	NFKB2|4791	-0.632213	4.62e-05	0.0584462	hsa-mir-423	ENSG00000077150	0	0	1	1	0	1	-0.132869
hg19:X:151127056-151127077:-	SYP|6855	-0.632173	4.63e-05	0.0585036	hsa-mir-224	ENSG00000102003	1	0	0	1	0	0	0.054207
hg19:3:188406582-188406605:+	ESR1|2099	-0.632165	4.63e-05	0.0585151	hsa-mir-28	ENSG00000091831	1	0	0	0	0	1	-0.0364088
hg19:5:148810263-148810285:+	ATP6V0A2|23545	-0.632156	4.63e-05	0.0585319	hsa-mir-145	ENSG00000185344	0	1	0	0	0	1	-0.119441
hg19:16:69967049-69967070:+	DGCR2|9993	-0.632154	4.63e-05	0.0585319	hsa-mir-140	ENSG00000070413	1	1	1	1	1	1	-0.0620141
hg19:14:101531682-101531705:+	DPF2|5977	-0.632103	4.64e-05	0.0585893	hsa-mir-409	ENSG00000133884	1	0	1	1	0	0	-0.196426
hg19:19:46142309-46142329:-	GRHL2|79977	-0.631963	4.66e-05	0.0587081	hsa-mir-330	ENSG00000083307	1	0	1	1	0	1	-0.0676834
hg19:17:57918637-57918655:+	GSTM3|2947	-0.631933	4.67e-05	0.0587081	hsa-mir-21	ENSG00000134202	1	0	0	1	0	0	-0.497676
hg19:1:9211795-9211816:-	PLCG1|5335	-0.631933	4.67e-05	0.0587081	hsa-mir-34a	ENSG00000124181	1	0	1	1	0	1	-0.289607
hg19:13:50623305-50623325:-	KIF13A|63971	-0.631933	4.67e-05	0.0587081	hsa-mir-15a	ENSG00000137177	0	0	1	1	0	1	-0.00380326
hg19:14:101522606-101522627:+	ERGIC1|57222	-0.631927	4.67e-05	0.0587148	hsa-mir-323b	ENSG00000113719	1	0	1	1	0	0	-0.0413153
hg19:17:1953224-1953244:-	ALS2CL|259173	-0.631866	4.68e-05	0.0588128	hsa-mir-132	ENSG00000178038	1	0	0	0	0	1	-0.121885
hg19:19:52196560-52196580:+	ZNF687|57592	-0.631863	4.68e-05	0.0588165	hsa-mir-125a	ENSG00000143373	1	0	0	1	0	1	0.106165
hg19:6:33175632-33175654:+	CHRM1|1128	-0.631741	4.7e-05	0.0589707	hsa-mir-219-1	ENSG00000168539	0	1	0	1	0	0	-0.125726
hg19:1:71533363-71533385:-	CLIP3|25999	-0.631723	4.7e-05	0.0589707	hsa-mir-186	ENSG00000105270	0	1	0	1	0	0	-0.20246
hg19:16:69967046-69967068:+	EYS|346007	-0.631697	4.71e-05	0.0589707	hsa-mir-140	ENSG00000188107	1	0	1	0	1	1	-0.163524
hg19:10:104196277-104196296:+	FHOD3|80206	-0.631653	4.71e-05	0.0589707	hsa-mir-146b	ENSG00000134775	0	0	1	0	0	1	-0.626256
hg19:11:122022984-122023005:-	SLCO4C1|353189	-0.631653	4.71e-05	0.0589707	hsa-mir-100	ENSG00000173930	1	0	0	1	0	0	-0.504578
hg19:9:97847745-97847767:+	CEACAM1|634	-0.631653	4.71e-05	0.0589707	hsa-mir-27b	ENSG00000079385	0	0	1	0	0	1	-0.37832
hg19:17:11985226-11985247:+	ELN|2006	-0.631653	4.71e-05	0.0589707	hsa-mir-744	ENSG00000049540	1	0	1	1	1	1	-0.361875
hg19:16:69967049-69967072:+	MMP24|10893	-0.631653	4.71e-05	0.0589707	hsa-mir-140	ENSG00000125966	1	0	1	1	0	0	-0.220765
hg19:17:28444149-28444171:+	TCF7L1|83439	-0.631653	4.71e-05	0.0589707	hsa-mir-423	ENSG00000152284	1	0	1	0	0	1	-0.195635
hg19:16:14397874-14397894:+	B3GALTL|145173	-0.631583	4.73e-05	0.0590853	hsa-mir-193b	ENSG00000187676	0	1	0	1	0	1	-0.00902829
hg19:17:46114539-46114561:-	CATSPER2|117155	-0.631557	4.73e-05	0.0591152	hsa-mir-152	ENSG00000166762	1	0	0	1	0	1	-0.155384
hg19:X:85158690-85158708:-	LRP1|4035	-0.631553	4.73e-05	0.0591206	hsa-mir-361	ENSG00000123384	1	0	1	1	1	1	0.00102404
hg19:X:133680713-133680732:-	YIPF4|84272	-0.631549	4.73e-05	0.0591206	hsa-mir-424	ENSG00000119820	1	0	0	1	0	1	-0.0139316
hg19:17:28444149-28444169:+	HOXB4|3214	-0.631454	4.75e-05	0.0592271	hsa-mir-423	ENSG00000182742	1	0	0	1	0	0	-0.256094
hg19:16:14397875-14397896:+	HPCAL4|51440	-0.631428	4.75e-05	0.0592271	hsa-mir-193b	ENSG00000116983	1	0	0	0	1	0	-0.0145654
hg19:12:7073276-7073299:+	PTPRT|11122	-0.631402	4.76e-05	0.0592271	hsa-mir-141	ENSG00000196090	1	0	0	1	0	1	-0.10993
hg19:17:6920988-6921007:-	TBC1D26|353149	-0.631381	4.76e-05	0.0592271	hsa-mir-195	ENSG00000214946	0	0	1	0	0	1	-0.0273198
hg19:6:72086708-72086729:-	TLR6|10333	-0.631373	4.76e-05	0.0592271	hsa-mir-30c-2	ENSG00000174130	0	0	1	0	0	1	-0.408243
hg19:19:13947407-13947430:-	SAFB2|9667	-0.631373	4.76e-05	0.0592271	hsa-mir-23a	ENSG00000130254	0	0	1	1	1	0	-0.371141
hg19:1:9211793-9211815:-	ROBO1|6091	-0.631373	4.76e-05	0.0592271	hsa-mir-34a	ENSG00000169855	0	0	1	0	0	1	-0.350476
hg19:21:17912157-17912179:+	RAP2B|5912	-0.631373	4.76e-05	0.0592271	hsa-let-7c	ENSG00000181467	1	0	0	1	0	0	-0.330755
hg19:5:148810224-148810244:+	ELOVL6|79071	-0.631373	4.76e-05	0.0592271	hsa-mir-145	ENSG00000170522	1	0	0	1	0	1	-0.306254
hg19:X:133675397-133675417:-	TREM1|54210	-0.631373	4.76e-05	0.0592271	hsa-mir-542	ENSG00000124731	1	0	0	1	0	1	-0.237565
hg19:9:97847745-97847766:+	PLB1|151056	-0.631373	4.76e-05	0.0592271	hsa-mir-27b	ENSG00000163803	1	1	1	1	0	1	-0.00805443
hg19:1:207975247-207975270:-	LMO2|4005	-0.631314	4.77e-05	0.0593245	hsa-mir-29c	ENSG00000135363	1	0	0	0	1	0	0.0746207
hg19:12:54731062-54731085:+	ZNF544|27300	-0.631198	4.79e-05	0.0594831	hsa-mir-148b	ENSG00000198131	1	0	1	1	1	1	-0.0100923
hg19:14:101335412-101335433:+	SLC2A4|6517	-0.631144	4.8e-05	0.0594831	hsa-mir-493	ENSG00000181856	1	0	0	1	0	0	-0.171698
hg19:21:17962610-17962632:+	PLXDC2|84898	-0.631137	4.8e-05	0.0594831	hsa-mir-125b-2	ENSG00000120594	1	1	1	0	0	1	-0.176797
hg19:17:28444149-28444172:+	CGREF1|10669	-0.631092	4.81e-05	0.0594831	hsa-mir-423	ENSG00000138028	0	1	1	0	1	0	-0.277812
hg19:15:55665189-55665211:-	COLEC12|81035	-0.631092	4.81e-05	0.0594831	hsa-mir-628	ENSG00000158270	0	0	1	0	0	1	-0.234591
hg19:7:93112132-93112153:-	DNAJC27|51277	-0.631092	4.81e-05	0.0594831	hsa-mir-653	ENSG00000115137	0	0	1	1	0	0	-0.228013
hg19:3:168269702-168269723:+	CNR1|1268	-0.631092	4.81e-05	0.0594831	hsa-mir-551b	ENSG00000118432	1	1	0	1	0	0	-0.18304
hg19:3:188406623-188406645:+	FAM189A2|9413	-0.631092	4.81e-05	0.0594831	hsa-mir-28	ENSG00000135063	0	0	1	0	1	0	-0.0762646
hg19:12:62997527-62997547:+	HGF|3082	-0.631092	4.81e-05	0.0594831	hsa-let-7i	ENSG00000019991	0	0	1	1	0	0	0.0087392
hg19:X:49767773-49767795:+	ST7L|54879	-0.631092	4.81e-05	0.0594831	hsa-mir-532	ENSG00000007341	0	1	0	1	0	0	0.0401765
hg19:12:95702216-95702240:+	UTP11L|51118	-0.63106	4.82e-05	0.0595373	hsa-mir-331	ENSG00000183520	1	0	0	0	0	1	0.0432577
hg19:17:57215148-57215171:-	SPTBN2|6712	-0.630997	4.83e-05	0.059626	hsa-mir-454	ENSG00000173898	0	0	1	0	1	0	-0.133751
hg19:11:64658631-64658653:-	NUAK1|9891	-0.630997	4.83e-05	0.059626	hsa-mir-192	ENSG00000074590	0	0	1	1	0	0	-0.112902
hg19:12:7072909-7072928:+	TTLL4|9654	-0.630923	4.84e-05	0.0597471	hsa-mir-200c	ENSG00000135912	0	1	1	0	0	1	0.0658769
hg19:1:26881066-26881087:+	LZTS1|11178	-0.630812	4.86e-05	0.0597556	hsa-mir-1976	ENSG00000061337	1	0	0	1	0	1	-0.339794
hg19:17:56408607-56408629:-	EPM2AIP1|9852	-0.630812	4.86e-05	0.0597556	hsa-mir-142	ENSG00000178567	0	0	1	1	0	0	-0.268909
hg19:14:101528393-101528415:+	ZADH2|284273	-0.630805	4.86e-05	0.0597657	hsa-mir-377	ENSG00000180011	1	0	0	1	0	1	-0.0996019
hg19:X:45606481-45606502:-	ERBB3|2065	-0.630802	4.86e-05	0.0597703	hsa-mir-222	ENSG00000065361	0	0	1	1	0	1	-0.0295826
hg19:14:101506606-101506628:+	ZFP14|57677	-0.630798	4.86e-05	0.0597748	hsa-mir-654	ENSG00000142065	0	0	1	1	0	0	-0.117827
hg19:19:50004093-50004113:-	C8orf46|254778	-0.630741	4.87e-05	0.0598731	hsa-mir-150	ENSG00000169085	1	0	0	1	1	0	-0.0346643
hg19:7:150935535-150935560:+	MLNR|2862	-0.630736	4.87e-05	0.059881	hsa-mir-671	ENSG00000102539	0	0	1	0	0	1	-0.265685
hg19:16:69967045-69967069:+	CELSR3|1951	-0.630716	4.88e-05	0.0598935	hsa-mir-140	ENSG00000008300	0	0	1	1	1	1	-0.409605
hg19:10:104196277-104196295:+	PRKCG|5582	-0.630594	4.9e-05	0.0600063	hsa-mir-146b	ENSG00000126583	1	0	0	0	0	1	0.0213292
hg19:17:1617207-1617230:-	PDZRN4|29951	-0.630532	4.91e-05	0.0600063	hsa-mir-22	ENSG00000165966	0	0	1	0	0	1	-0.37728
hg19:3:188406623-188406645:+	LRRC48|83450	-0.630532	4.91e-05	0.0600063	hsa-mir-28	ENSG00000171962	1	0	1	0	0	1	-0.352598
hg19:19:52195909-52195929:+	IL11RA|3590	-0.630532	4.91e-05	0.0600063	hsa-mir-99b	ENSG00000137070	1	1	0	0	1	0	-0.0245382
hg19:5:148441938-148441958:-	TMEM116|89894	-0.630525	4.91e-05	0.0600195	hsa-mir-584	ENSG00000198270	1	1	1	1	0	0	0.191228
hg19:22:20073595-20073615:+	AKAP13|11214	-0.630517	4.91e-05	0.0600308	hsa-mir-1306	ENSG00000170776	1	0	1	0	0	1	-0.00940156
hg19:12:7073276-7073297:+	ABCA9|10350	-0.63048	4.92e-05	0.0600954	hsa-mir-141	ENSG00000154258	0	0	1	0	1	1	-0.30001
hg19:14:101506606-101506628:+	LARP1|23367	-0.630377	4.94e-05	0.0602584	hsa-mir-654	ENSG00000155506	1	0	1	1	0	1	-0.0312015
hg19:8:135812777-135812797:-	CADPS|8618	-0.630333	4.94e-05	0.0602706	hsa-mir-30b	ENSG00000163618	1	0	0	1	0	1	-0.186779
hg19:5:148808539-148808560:+	MARCH11|441061	-0.630258	4.96e-05	0.0602706	hsa-mir-143	ENSG00000183654	1	0	1	1	0	0	-0.251751
hg19:2:219866370-219866391:-	PHKB|5257	-0.630252	4.96e-05	0.0602706	hsa-mir-375	ENSG00000102893	0	0	1	0	1	0	-0.626539
hg19:6:72113257-72113278:-	MSL3|10943	-0.630252	4.96e-05	0.0602706	hsa-mir-30a	ENSG00000005302	1	0	1	1	0	0	-0.575457
hg19:21:17912157-17912178:+	ATG12|9140	-0.630252	4.96e-05	0.0602706	hsa-let-7c	ENSG00000145782	1	0	0	1	0	0	-0.385809
hg19:8:135812814-135812835:-	LPCAT1|79888	-0.630252	4.96e-05	0.0602706	hsa-mir-30b	ENSG00000153395	1	0	0	1	0	0	-0.366497
hg19:X:85158645-85158669:-	TIMP3|7078	-0.630252	4.96e-05	0.0602706	hsa-mir-361	ENSG00000100234	1	0	0	1	0	1	-0.355984
hg19:3:188406623-188406644:+	HSPA1L|3305	-0.630252	4.96e-05	0.0602706	hsa-mir-28	ENSG00000226704	0	0	1	0	0	1	-0.337434
hg19:7:130561508-130561527:-	NEB|4703	-0.630252	4.96e-05	0.0602706	hsa-mir-29a	ENSG00000183091	0	0	1	0	1	1	-0.250597
hg19:10:104196314-104196337:+	MME|4311	-0.630252	4.96e-05	0.0602706	hsa-mir-146b	ENSG00000196549	1	0	0	0	1	0	-0.138676
hg19:9:97847745-97847767:+	AP1M1|8907	-0.630252	4.96e-05	0.0602706	hsa-mir-27b	ENSG00000072958	0	0	1	0	1	0	-0.12946
hg19:2:219267380-219267400:+	P2RY13|53829	-0.630252	4.96e-05	0.0602706	hsa-mir-26b	ENSG00000181631	1	0	0	1	0	0	-0.00976394
hg19:17:57918672-57918693:+	VAV3|10451	-0.630156	4.98e-05	0.0604101	hsa-mir-21	ENSG00000134215	0	0	1	0	1	0	-0.365812
hg19:14:101351087-101351109:+	AGAP1|116987	-0.630141	4.98e-05	0.0604289	hsa-mir-136	ENSG00000157985	0	0	1	1	0	1	-0.100198
hg19:13:50623307-50623325:-	CLCN2|1181	-0.630126	4.98e-05	0.0604542	hsa-mir-15a	ENSG00000114859	0	1	1	1	1	1	0.00628527
hg19:9:73424948-73424969:-	TGFA|7039	-0.630037	5e-05	0.060507	hsa-mir-204	ENSG00000163235	1	0	0	0	0	1	-0.473903
hg19:5:148810224-148810247:+	TK2|7084	-0.630016	5e-05	0.060507	hsa-mir-145	ENSG00000166548	1	0	1	1	0	0	-0.257758
hg19:7:129410289-129410311:-	FKBP5|2289	-0.630016	5e-05	0.060507	hsa-mir-182	ENSG00000096060	1	0	0	1	0	1	-0.182751
hg19:17:11985226-11985248:+	HLX|3142	-0.629972	5.01e-05	0.060507	hsa-mir-744	ENSG00000136630	1	1	0	0	1	1	-0.147895
hg19:2:177015058-177015077:+	AHCYL2|23382	-0.629972	5.01e-05	0.060507	hsa-mir-10b	ENSG00000158467	1	0	0	1	0	0	-0.140438
hg19:X:45605650-45605671:-	SLC24A3|57419	-0.629964	5.01e-05	0.0605206	hsa-mir-221	ENSG00000185052	1	0	0	1	0	0	-0.451375
hg19:19:13947262-13947282:-	C11orf54|28970	-0.62992	5.02e-05	0.060595	hsa-mir-27a	ENSG00000182919	1	1	0	0	1	0	-0.199126
hg19:17:1617210-1617228:-	GPBP1L1|60313	-0.629873	5.03e-05	0.0606483	hsa-mir-22	ENSG00000159592	0	0	1	0	0	1	-0.0871073
hg19:11:122022948-122022970:-	CAPN3|825	-0.629801	5.04e-05	0.0607743	hsa-mir-100	ENSG00000092529	0	0	1	0	1	1	-0.00185676
hg19:5:159912379-159912400:+	ITGA7|3679	-0.629692	5.06e-05	0.0607916	hsa-mir-146a	ENSG00000135424	1	0	1	0	1	1	-0.423229
hg19:6:72113255-72113278:-	NFKB2|4791	-0.629692	5.06e-05	0.0607916	hsa-mir-30a	ENSG00000077150	0	1	0	0	0	1	-0.355576
hg19:5:148808541-148808563:+	FAM92A1|137392	-0.629692	5.06e-05	0.0607916	hsa-mir-143	ENSG00000188343	0	1	1	1	0	1	-0.295653
hg19:1:9211793-9211815:-	TSHZ3|57616	-0.629692	5.06e-05	0.0607916	hsa-mir-34a	ENSG00000121297	0	0	1	0	0	1	-0.197221
hg19:1:205417490-205417512:-	PDLIM2|64236	-0.629692	5.06e-05	0.0607916	hsa-mir-135b	ENSG00000120913	0	0	1	1	0	0	0.0288508
hg19:17:29887071-29887091:+	SH2D7|646892	-0.629666	5.06e-05	0.06083	hsa-mir-193a	ENSG00000183476	0	1	1	0	0	1	-0.0583173
hg19:X:85158650-85158669:-	RYK|6259	-0.629588	5.08e-05	0.0609365	hsa-mir-361	ENSG00000163785	1	0	1	0	0	1	-0.0102816
hg19:6:30552109-30552131:+	LGI4|163175	-0.629473	5.1e-05	0.0610737	hsa-mir-877	ENSG00000153902	1	1	1	0	1	1	0.0619193
hg19:X:85158647-85158669:-	THRA|7067	-0.629412	5.11e-05	0.0610737	hsa-mir-361	ENSG00000126351	1	0	0	0	1	0	-0.272239
hg19:17:28444149-28444172:+	TWIST1|7291	-0.629412	5.11e-05	0.0610737	hsa-mir-423	ENSG00000122691	0	0	1	1	0	0	-0.235498
hg19:12:7072910-7072927:+	SEL1L3|23231	-0.629397	5.11e-05	0.0610977	hsa-mir-200c	ENSG00000091490	0	0	1	0	0	1	-0.194777
hg19:12:7072905-7072927:+	ADH1B|125	-0.62936	5.12e-05	0.0611497	hsa-mir-200c	ENSG00000196616	1	0	0	1	0	0	-0.38496
hg19:7:129410286-129410311:-	CADM1|23705	-0.629316	5.13e-05	0.0612054	hsa-mir-182	ENSG00000182985	0	1	0	0	1	1	-0.266233
hg19:19:13947163-13947183:-	ZNF772|400720	-0.629316	5.13e-05	0.0612054	hsa-mir-24-2	ENSG00000197128	1	0	0	1	0	0	-0.206516
hg19:10:105154058-105154079:-	HEG1|57493	-0.629316	5.13e-05	0.0612054	hsa-mir-1307	ENSG00000173706	0	0	1	1	0	1	-0.177176
hg19:11:72326148-72326169:-	C3|718	-0.629176	5.15e-05	0.0613166	hsa-mir-139	ENSG00000125730	0	1	1	0	1	0	-0.289583
hg19:14:101492408-101492429:+	PRDM16|63976	-0.629176	5.15e-05	0.0613166	hsa-mir-758	ENSG00000142611	1	0	0	0	1	1	-0.168386
hg19:16:67236230-67236252:-	DCLK1|9201	-0.629132	5.16e-05	0.0613166	hsa-mir-328	ENSG00000133083	0	0	1	1	0	0	-0.563212
hg19:1:207975248-207975269:-	NCKAP1L|3071	-0.629132	5.16e-05	0.0613166	hsa-mir-29c	ENSG00000123338	1	0	1	0	1	0	-0.377402
hg19:X:133680674-133680695:-	HS3ST1|9957	-0.629132	5.16e-05	0.0613166	hsa-mir-424	ENSG00000002587	1	0	0	1	0	1	-0.286774
hg19:3:188406623-188406645:+	C7orf31|136895	-0.629132	5.16e-05	0.0613166	hsa-mir-28	ENSG00000153790	0	0	1	0	0	1	-0.178753
hg19:8:135817163-135817184:-	PLEKHA8|84725	-0.629132	5.16e-05	0.0613166	hsa-mir-30d	ENSG00000106086	1	0	0	0	0	1	-0.0477432
hg19:21:17962609-17962629:+	NKRF|55922	-0.62912	5.16e-05	0.0613355	hsa-mir-125b-2	ENSG00000186416	0	0	1	1	0	1	0.11435
hg19:17:56408643-56408665:-	CHRAC1|54108	-0.629108	5.17e-05	0.0613591	hsa-mir-142	ENSG00000104472	1	0	1	0	1	0	-0.0923648
hg19:6:72113260-72113277:-	GPR56|9289	-0.629061	5.17e-05	0.0614453	hsa-mir-30a	ENSG00000205336	1	0	0	0	1	0	0.0472699
hg19:5:58999455-58999478:-	GLS2|27165	-0.629036	5.18e-05	0.0614797	hsa-mir-582	ENSG00000135423	1	0	1	0	0	1	-0.243474
hg19:8:41518001-41518024:-	NHLH1|4807	-0.62899	5.19e-05	0.0615536	hsa-mir-486	ENSG00000171786	1	0	0	1	1	1	-0.00493865
hg19:16:69967050-69967068:+	PPM1E|22843	-0.628958	5.19e-05	0.0615926	hsa-mir-140	ENSG00000175175	0	0	1	1	0	1	0.099279
hg19:X:85158648-85158668:-	STRA6|64220	-0.628942	5.2e-05	0.0615926	hsa-mir-361	ENSG00000137868	1	0	1	0	1	0	0.00249761
hg19:3:49057630-49057653:-	HEXDC|284004	-0.628893	5.21e-05	0.0615926	hsa-mir-425	ENSG00000169660	1	1	1	0	1	0	-0.0455156
hg19:17:57918633-57918656:+	FLT1|2321	-0.628852	5.21e-05	0.0615926	hsa-mir-21	ENSG00000102755	0	0	1	0	1	1	-0.554443
hg19:19:52196091-52196112:+	TNFSF10|8743	-0.628852	5.21e-05	0.0615926	hsa-let-7e	ENSG00000121858	1	0	0	1	0	0	-0.448209
hg19:1:110141562-110141583:+	RCOR2|283248	-0.628852	5.21e-05	0.0615926	hsa-mir-197	ENSG00000167771	0	0	1	0	0	1	-0.406491
hg19:17:28444149-28444171:+	FLNC|2318	-0.628852	5.21e-05	0.0615926	hsa-mir-423	ENSG00000128591	0	0	1	0	1	1	-0.345992
hg19:7:130561506-130561530:-	ZNF423|23090	-0.628852	5.21e-05	0.0615926	hsa-mir-29a	ENSG00000102935	0	0	1	0	1	0	-0.263013
hg19:X:45606444-45606463:-	TLN2|83660	-0.628852	5.21e-05	0.0615926	hsa-mir-222	ENSG00000171914	0	1	1	0	0	1	-0.24398
hg19:5:148808540-148808562:+	CCDC74A|90557	-0.628852	5.21e-05	0.0615926	hsa-mir-143	ENSG00000163040	1	0	0	0	1	0	-0.231534
hg19:X:49767773-49767794:+	CAND2|23066	-0.628852	5.21e-05	0.0615926	hsa-mir-532	ENSG00000144712	0	0	1	1	0	0	0.0534839
hg19:7:129414812-129414831:-	PZP|5858	-0.628844	5.21e-05	0.0616009	hsa-mir-183	ENSG00000126838	1	0	1	0	0	1	0.0164155
hg19:8:27559244-27559266:+	OPTN|10133	-0.628758	5.23e-05	0.0617403	hsa-mir-3622a	ENSG00000123240	1	1	0	0	0	1	-0.128496
hg19:14:100576052-100576077:+	CCDC148|130940	-0.628672	5.25e-05	0.06187	hsa-mir-342	ENSG00000153237	1	0	0	1	1	0	-0.0700633
hg19:5:85916359-85916384:+	PSMA4|5685	-0.628644	5.25e-05	0.06187	hsa-mir-3607	ENSG00000041357	0	0	1	0	1	0	0.0155524
hg19:3:52302356-52302374:-	DZIP1|22873	-0.628636	5.25e-05	0.06187	hsa-let-7g	ENSG00000134874	1	0	0	1	0	0	-0.316878
hg19:X:85158649-85158669:-	MPP2|4355	-0.628615	5.26e-05	0.06187	hsa-mir-361	ENSG00000108852	1	0	0	1	1	0	-0.29156
hg19:17:1617207-1617229:-	PHF17|79960	-0.628571	5.27e-05	0.06187	hsa-mir-22	ENSG00000077684	1	0	0	1	1	1	-0.573875
hg19:17:6920985-6921007:-	NKRF|55922	-0.628571	5.27e-05	0.06187	hsa-mir-195	ENSG00000186416	0	0	1	1	0	1	-0.333852
hg19:17:46657266-46657288:-	CEP76|79959	-0.628571	5.27e-05	0.06187	hsa-mir-10a	ENSG00000101624	1	0	0	1	0	0	-0.272984
hg19:14:101506606-101506626:+	CCDC148|130940	-0.628571	5.27e-05	0.06187	hsa-mir-654	ENSG00000153237	1	0	0	1	0	1	-0.246764
hg19:3:49057634-49057655:-	SLC5A2|6524	-0.628571	5.27e-05	0.06187	hsa-mir-425	ENSG00000140675	1	0	0	0	0	1	-0.195541
hg19:X:133680673-133680695:-	DCBLD2|131566	-0.628571	5.27e-05	0.06187	hsa-mir-424	ENSG00000057019	0	0	1	1	1	1	-0.149425
hg19:14:65937871-65937893:+	DPCR1|135656	-0.628571	5.27e-05	0.06187	hsa-mir-625	ENSG00000257232	0	0	1	0	0	1	-0.0576919
hg19:14:101506606-101506626:+	GABRB2|2561	-0.628571	5.27e-05	0.06187	hsa-mir-654	ENSG00000145864	1	0	0	1	0	0	0.009445
hg19:19:46142308-46142329:-	MORC4|79710	-0.628475	5.28e-05	0.0620125	hsa-mir-330	ENSG00000133131	1	0	0	0	1	1	-0.199051
hg19:X:45605651-45605671:-	ST3GAL2|6483	-0.628467	5.29e-05	0.0620231	hsa-mir-221	ENSG00000157350	0	1	0	0	1	0	-0.293215
hg19:3:160122433-160122452:+	NOS1AP|9722	-0.628379	5.3e-05	0.0621439	hsa-mir-15b	ENSG00000198929	1	1	1	1	0	1	-0.0956775
hg19:19:13947407-13947429:-	PLCD4|84812	-0.628335	5.31e-05	0.0621439	hsa-mir-23a	ENSG00000115556	1	0	0	0	1	1	-0.285717
hg19:17:79099687-79099709:-	FAM98A|25940	-0.628335	5.31e-05	0.0621439	hsa-mir-338	ENSG00000119812	1	0	0	0	1	1	-0.263016
hg19:2:177015058-177015073:+	ZBTB37|84614	-0.628295	5.32e-05	0.0621439	hsa-mir-10b	ENSG00000185278	1	0	0	0	0	1	0.069414
hg19:19:52196091-52196111:+	HGF|3082	-0.628291	5.32e-05	0.0621439	hsa-let-7e	ENSG00000019991	1	0	0	1	0	0	-0.289868
hg19:7:25989542-25989561:-	COPS7B|64708	-0.628239	5.33e-05	0.062239	hsa-mir-148a	ENSG00000144524	1	1	1	0	0	1	-0.0866334
hg19:X:49779258-49779278:+	PDDC1|347862	-0.628136	5.35e-05	0.0624079	hsa-mir-502	ENSG00000177225	1	0	0	1	0	0	0.0390797
hg19:3:189547764-189547786:+	TRPC1|7220	-0.628116	5.35e-05	0.0624132	hsa-mir-944	ENSG00000144935	1	0	0	1	0	0	0.0496766
hg19:1:41220087-41220105:+	TMEM132D|121256	-0.628098	5.36e-05	0.0624132	hsa-mir-30e	ENSG00000151952	0	0	1	0	1	1	-0.181603
hg19:7:5535504-5535526:-	TP53I11|9537	-0.628011	5.37e-05	0.0624132	hsa-mir-589	ENSG00000175274	1	1	1	0	1	0	-0.164325
hg19:11:122022986-122023005:-	IQCB1|9657	-0.628011	5.37e-05	0.0624132	hsa-mir-100	ENSG00000173226	1	0	0	0	0	1	-0.144829
hg19:3:188406582-188406603:+	TMEM86B|255043	-0.628011	5.37e-05	0.0624132	hsa-mir-28	ENSG00000180089	0	0	1	0	0	1	-0.0793698
hg19:19:13947410-13947431:-	BTBD1|53339	-0.628011	5.37e-05	0.0624132	hsa-mir-23a	ENSG00000064726	1	0	1	1	0	1	0.0785193
hg19:3:183959193-183959215:+	DAB1|1600	-0.627908	5.39e-05	0.0625756	hsa-mir-1224	ENSG00000173406	1	1	0	0	1	0	-0.304615
hg19:14:100576010-100576031:+	BRSK2|9024	-0.627801	5.41e-05	0.0626943	hsa-mir-342	ENSG00000174672	1	0	1	1	0	1	-0.0134494
hg19:10:104196313-104196334:+	MICALL1|85377	-0.627731	5.43e-05	0.0626943	hsa-mir-146b	ENSG00000100139	0	0	1	0	0	1	-0.42738
hg19:16:67236230-67236252:-	CGREF1|10669	-0.627731	5.43e-05	0.0626943	hsa-mir-328	ENSG00000138028	0	0	1	0	1	1	-0.350335
hg19:9:97847745-97847767:+	ZNF831|128611	-0.627731	5.43e-05	0.0626943	hsa-mir-27b	ENSG00000124203	1	0	0	0	0	1	-0.329976
hg19:3:168269702-168269723:+	SERPINA3|12	-0.627731	5.43e-05	0.0626943	hsa-mir-551b	ENSG00000196136	1	0	1	0	1	0	-0.200226
hg19:16:69967006-69967028:+	ZNF747|65988	-0.627731	5.43e-05	0.0626943	hsa-mir-140	ENSG00000169955	1	0	0	1	0	0	-0.191103
hg19:X:45606438-45606463:-	ABLIM3|22885	-0.627731	5.43e-05	0.0626943	hsa-mir-222	ENSG00000173210	1	0	0	1	0	0	-0.15385
hg19:12:7073318-7073342:+	CALD1|800	-0.627731	5.43e-05	0.0626943	hsa-mir-141	ENSG00000122786	1	0	0	1	0	1	0.0298676
hg19:X:146318498-146318521:-	SLC26A10|65012	-0.627655	5.44e-05	0.0628279	hsa-mir-508	ENSG00000135502	1	1	1	0	0	1	-0.203898
hg19:1:71533363-71533383:-	GRIA4|2893	-0.627576	5.46e-05	0.0629459	hsa-mir-186	ENSG00000152578	1	0	0	1	0	1	-0.21769
hg19:21:17911420-17911443:+	CDK7|1022	-0.627528	5.47e-05	0.0629858	hsa-mir-99a	ENSG00000262841	0	0	1	0	0	1	-0.0139831
hg19:21:26946295-26946321:+	PPHLN1|51535	-0.627507	5.47e-05	0.0629858	hsa-mir-155	ENSG00000134283	1	0	0	1	0	0	0.0593524
hg19:19:13985540-13985561:+	DPEP2|64174	-0.627498	5.47e-05	0.0629858	hsa-mir-181c	ENSG00000167261	1	1	1	0	0	1	-0.0582409
hg19:X:133675397-133675416:-	ABLIM3|22885	-0.627495	5.47e-05	0.0629858	hsa-mir-542	ENSG00000173210	1	1	0	0	1	0	-0.100073
hg19:X:133675398-133675416:-	MYBBP1A|10514	-0.627456	5.48e-05	0.0629858	hsa-mir-542	ENSG00000132382	0	0	1	0	0	1	-0.0302231
hg19:9:97847787-97847809:+	GALNT1|2589	-0.627451	5.48e-05	0.0629858	hsa-mir-27b	ENSG00000141429	1	1	0	1	0	1	-0.600234
hg19:21:17911421-17911442:+	DNAH5|1767	-0.627451	5.48e-05	0.0629858	hsa-mir-99a	ENSG00000039139	1	0	0	0	0	1	-0.38655
hg19:19:13947411-13947430:-	PEX2|5828	-0.627451	5.48e-05	0.0629858	hsa-mir-23a	ENSG00000164751	1	0	0	1	0	1	-0.297874
hg19:X:45606441-45606462:-	VGLL4|9686	-0.627451	5.48e-05	0.0629858	hsa-mir-222	ENSG00000144560	1	1	0	1	0	0	-0.280438
hg19:9:97847745-97847767:+	TCN1|6947	-0.627451	5.48e-05	0.0629858	hsa-mir-27b	ENSG00000134827	0	0	1	0	0	1	-0.272538
hg19:14:65937871-65937891:+	LCMT2|9836	-0.627451	5.48e-05	0.0629858	hsa-mir-625	ENSG00000168806	1	0	1	0	1	0	-0.242504
hg19:9:97847745-97847767:+	AP1B1|162	-0.627451	5.48e-05	0.0629858	hsa-mir-27b	ENSG00000100280	1	0	0	0	0	1	-0.241516
hg19:20:57392716-57392737:-	C6orf141|135398	-0.627451	5.48e-05	0.0629858	hsa-mir-296	ENSG00000197261	1	0	0	0	0	1	-0.229873
hg19:10:104196277-104196300:+	OSR1|130497	-0.627451	5.48e-05	0.0629858	hsa-mir-146b	ENSG00000143867	0	0	1	0	1	0	-0.128798
hg19:17:57918639-57918656:+	SPEG|10290	-0.627451	5.48e-05	0.0629858	hsa-mir-21	ENSG00000072195	1	0	1	0	0	1	-0.101987
hg19:19:52196089-52196111:+	RASIP1|54922	-0.627365	5.5e-05	0.0631297	hsa-let-7e	ENSG00000105538	0	0	1	0	0	1	0.0276557
hg19:X:49768162-49768183:+	PTGIS|5740	-0.627207	5.53e-05	0.0632498	hsa-mir-188	ENSG00000124212	1	0	0	0	0	1	-0.0573168
hg19:6:72113261-72113279:-	VCAM1|7412	-0.627171	5.53e-05	0.0632498	hsa-mir-30a	ENSG00000162692	1	0	1	0	0	1	-0.364099
hg19:17:28444149-28444171:+	GLI2|2736	-0.627171	5.53e-05	0.0632498	hsa-mir-423	ENSG00000074047	1	1	0	1	1	1	-0.280179
hg19:19:13947265-13947282:-	TPST1|8460	-0.627171	5.53e-05	0.0632498	hsa-mir-27a	ENSG00000169902	0	0	1	0	0	1	-0.230263
hg19:12:7073276-7073296:+	MAPT|4137	-0.627171	5.53e-05	0.0632498	hsa-mir-141	ENSG00000186868	0	1	0	0	1	1	-0.0415761
hg19:5:159912378-159912401:+	APOLD1|81575	-0.627045	5.56e-05	0.0634493	hsa-mir-146a	ENSG00000178878	1	0	0	1	0	0	-0.136344
hg19:3:52302353-52302375:-	LGI1|9211	-0.626945	5.58e-05	0.0635423	hsa-let-7g	ENSG00000108231	0	0	1	0	1	0	-0.107501
hg19:10:104196313-104196334:+	PIGN|23556	-0.626891	5.59e-05	0.0635423	hsa-mir-146b	ENSG00000197563	1	0	0	0	0	1	-0.491129
hg19:21:26946295-26946319:+	LRRC37A3|374819	-0.626891	5.59e-05	0.0635423	hsa-mir-155	ENSG00000176809	0	0	1	0	0	1	-0.417275
hg19:10:105154056-105154079:-	SH2D3C|10044	-0.626891	5.59e-05	0.0635423	hsa-mir-1307	ENSG00000095370	0	0	1	0	0	1	-0.223172
hg19:12:7073318-7073338:+	THBS1|7057	-0.626891	5.59e-05	0.0635423	hsa-mir-141	ENSG00000137801	0	0	1	1	0	0	-0.217467
hg19:9:97847745-97847766:+	SIGLEC5|8778	-0.626891	5.59e-05	0.0635423	hsa-mir-27b	ENSG00000105501	1	0	1	0	0	1	-0.16396
hg19:9:96941178-96941199:+	SUB1|10923	-0.626891	5.59e-05	0.0635423	hsa-let-7d	ENSG00000113387	1	0	0	1	0	0	-0.162041
hg19:6:72086708-72086729:-	IFFO1|25900	-0.626891	5.59e-05	0.0635423	hsa-mir-30c-2	ENSG00000010295	1	1	1	0	1	0	-0.156038
hg19:X:73507130-73507152:-	PCDHB13|56123	-0.626891	5.59e-05	0.0635423	hsa-mir-374a	ENSG00000187372	1	0	0	0	0	1	0.0420278
hg19:9:116971767-116971785:+	PSD3|23362	-0.626833	5.6e-05	0.0636531	hsa-mir-455	ENSG00000156011	1	0	0	1	0	1	-0.0979685
hg19:7:25989542-25989561:-	RNF220|55182	-0.626833	5.6e-05	0.0636531	hsa-mir-148a	ENSG00000187147	1	0	1	0	0	1	-0.0994177
hg19:10:105154099-105154119:-	ST6GAL2|84620	-0.626795	5.61e-05	0.0636981	hsa-mir-1307	ENSG00000144057	0	1	0	0	0	1	-0.0377404
hg19:19:52196025-52196046:+	ENAM|10117	-0.626661	5.64e-05	0.0638587	hsa-let-7e	ENSG00000132464	0	0	1	0	0	1	-0.125349
hg19:19:52196521-52196541:+	DUSP10|11221	-0.626611	5.65e-05	0.0638587	hsa-mir-125a	ENSG00000143507	0	1	0	0	0	1	-0.507717
hg19:7:130561507-130561530:-	MYH11|4629	-0.626611	5.65e-05	0.0638587	hsa-mir-29a	ENSG00000133392	0	0	1	0	0	1	-0.351753
hg19:10:104196313-104196330:+	LIMA1|51474	-0.626567	5.65e-05	0.0639275	hsa-mir-146b	ENSG00000050405	0	1	0	0	1	1	0.012215
hg19:2:177015057-177015079:+	ATMIN|23300	-0.626514	5.67e-05	0.0639932	hsa-mir-10b	ENSG00000166454	1	0	0	0	1	0	-0.0544883
hg19:6:72113262-72113278:-	PWWP2A|114825	-0.626497	5.67e-05	0.0640177	hsa-mir-30a	ENSG00000170234	0	0	1	1	0	1	0.0964463
hg19:1:110141562-110141586:+	CR2|1380	-0.626367	5.69e-05	0.0641232	hsa-mir-197	ENSG00000117322	0	0	1	0	0	1	-0.0219094
hg19:7:130561545-130561565:-	CTBS|1486	-0.626336	5.7e-05	0.0641232	hsa-mir-29a	ENSG00000117151	1	0	1	0	0	1	0.0640496
hg19:17:57918612-57918634:+	ZCCHC8|55596	-0.626331	5.7e-05	0.0641232	hsa-mir-21	ENSG00000033030	1	0	0	0	1	0	-0.380747
hg19:17:28444149-28444172:+	FBXO17|115290	-0.626331	5.7e-05	0.0641232	hsa-mir-423	ENSG00000269190	1	0	0	0	1	0	-0.298729
hg19:14:101349372-101349394:+	GLCCI1|113263	-0.626331	5.7e-05	0.0641232	hsa-mir-127	ENSG00000106415	0	1	0	1	0	0	-0.205964
hg19:13:50623305-50623325:-	ZBTB26|57684	-0.626331	5.7e-05	0.0641232	hsa-mir-15a	ENSG00000171448	1	0	0	0	0	1	-0.141459
hg19:7:99691444-99691461:-	SNN|8303	-0.626291	5.71e-05	0.0641977	hsa-mir-93	ENSG00000184602	1	0	0	1	0	0	0.0773744
hg19:X:49774343-49774364:+	FN1|2335	-0.626283	5.71e-05	0.0642096	hsa-mir-501	ENSG00000115414	0	0	1	0	0	1	-0.247747
hg19:7:25989542-25989561:-	HAUS5|23354	-0.62613	5.74e-05	0.0644205	hsa-mir-148a	ENSG00000249115	1	1	1	1	0	1	-0.1671
hg19:5:148810224-148810246:+	ARHGDIG|398	-0.626121	5.74e-05	0.0644205	hsa-mir-145	ENSG00000242173	0	1	1	0	0	1	-0.135567
hg19:7:129410286-129410311:-	CBX7|23492	-0.626094	5.75e-05	0.0644205	hsa-mir-182	ENSG00000100307	1	0	0	1	0	0	-0.472788
hg19:1:207975796-207975819:-	HVCN1|84329	-0.626094	5.75e-05	0.0644205	hsa-mir-29b-2	ENSG00000122986	1	0	0	0	1	0	0.0387249
hg19:X:85158647-85158670:-	BCL6B|255877	-0.626056	5.76e-05	0.0644205	hsa-mir-361	ENSG00000161940	1	0	0	1	0	0	-0.00917267
hg19:X:45605610-45605631:-	COX15|1355	-0.62605	5.76e-05	0.0644205	hsa-mir-221	ENSG00000014919	1	0	0	1	0	0	-0.530425
hg19:1:207975248-207975269:-	PDE3B|5140	-0.62605	5.76e-05	0.0644205	hsa-mir-29c	ENSG00000261923	0	0	1	0	0	1	-0.295741
hg19:12:7073318-7073338:+	PMEPA1|56937	-0.62605	5.76e-05	0.0644205	hsa-mir-141	ENSG00000124225	1	0	0	1	0	0	-0.269767
hg19:X:49773613-49773635:+	CCDC132|55610	-0.626022	5.76e-05	0.0644709	hsa-mir-362	ENSG00000004766	1	0	1	0	0	1	0.0326582
hg19:19:46178201-46178223:+	PLXNA4|91584	-0.625885	5.79e-05	0.0646943	hsa-mir-642a	ENSG00000221866	1	0	0	1	1	1	-0.219651
hg19:12:7073318-7073340:+	PTGIS|5740	-0.625814	5.81e-05	0.0647157	hsa-mir-141	ENSG00000124212	1	0	0	1	0	0	-0.342023
hg19:3:188406622-188406644:+	DEF8|54849	-0.62577	5.82e-05	0.0647157	hsa-mir-28	ENSG00000140995	0	0	1	0	1	0	-0.498809
hg19:17:11985226-11985247:+	LAMA2|3908	-0.62577	5.82e-05	0.0647157	hsa-mir-744	ENSG00000196569	0	0	1	0	0	1	-0.345667
hg19:9:97847745-97847766:+	ARHGAP9|64333	-0.62577	5.82e-05	0.0647157	hsa-mir-27b	ENSG00000123329	0	1	0	0	1	1	-0.185851
hg19:19:52196560-52196580:+	STAT6|6778	-0.625764	5.82e-05	0.0647259	hsa-mir-125a	ENSG00000166888	1	0	1	0	0	1	0.0190766
hg19:X:49767810-49767829:+	ABCG5|64240	-0.625758	5.82e-05	0.0647313	hsa-mir-532	ENSG00000138075	0	1	1	1	0	0	-0.175135
hg19:17:79099689-79099709:-	GLS|2744	-0.625674	5.84e-05	0.0648665	hsa-mir-338	ENSG00000115419	1	0	0	1	0	1	-0.472008
hg19:10:105154058-105154079:-	C9orf3|84909	-0.625674	5.84e-05	0.0648665	hsa-mir-1307	ENSG00000148120	1	0	0	0	0	1	-0.34038
hg19:12:7073276-7073297:+	GDPD5|81544	-0.625578	5.86e-05	0.0649897	hsa-mir-141	ENSG00000158555	0	1	0	0	1	0	-0.258498
hg19:13:92003010-92003031:+	PDE8A|5151	-0.625556	5.86e-05	0.0649897	hsa-mir-18a	ENSG00000073417	0	1	0	1	0	0	-0.00643152
hg19:10:105154058-105154079:-	CSRP1|1465	-0.625534	5.87e-05	0.0649897	hsa-mir-1307	ENSG00000159176	1	0	0	0	1	0	-0.240663
hg19:6:72086708-72086729:-	SPATC1|375686	-0.625517	5.87e-05	0.0649897	hsa-mir-30c-2	ENSG00000260319	0	0	1	0	0	1	-0.374602
hg19:12:7073318-7073342:+	ZEB1|6935	-0.62549	5.87e-05	0.0649897	hsa-mir-141	ENSG00000148516	1	1	1	1	1	1	-0.29273
hg19:9:96941123-96941145:+	PARVB|29780	-0.62549	5.87e-05	0.0649897	hsa-let-7d	ENSG00000188677	0	0	1	1	0	0	-0.181211
hg19:14:65937871-65937891:+	SCN5A|6331	-0.62549	5.87e-05	0.0649897	hsa-mir-625	ENSG00000183873	0	0	1	1	0	1	-0.156733
hg19:2:219267380-219267402:+	PYHIN1|149628	-0.62549	5.87e-05	0.0649897	hsa-mir-26b	ENSG00000163564	1	0	0	0	0	1	-0.0486774
hg19:22:46509571-46509593:+	WHAMM|123720	-0.625438	5.89e-05	0.065094	hsa-let-7b	ENSG00000156232	1	0	1	1	0	0	-0.342686
hg19:X:49774343-49774364:+	SDC3|9672	-0.625402	5.89e-05	0.0651528	hsa-mir-501	ENSG00000162512	0	1	0	0	0	1	-0.152924
hg19:X:133675397-133675416:-	NOMO3|408050	-0.625394	5.89e-05	0.0651528	hsa-mir-542	ENSG00000103226	1	0	1	0	0	1	-0.0233166
hg19:17:46657265-46657287:-	TMEM68|137695	-0.625377	5.9e-05	0.0651857	hsa-mir-10a	ENSG00000167904	1	0	0	1	0	0	-0.145373
hg19:14:102026700-102026721:-	KCNJ11|3767	-0.625371	5.9e-05	0.0651946	hsa-mir-1247	ENSG00000187486	0	0	1	0	1	0	-0.155305
hg19:X:135633087-135633109:+	GPRASP1|9737	-0.625298	5.91e-05	0.0652597	hsa-mir-934	ENSG00000198932	0	1	0	0	0	1	-0.267743
hg19:22:46509571-46509594:+	NADSYN1|55191	-0.625254	5.92e-05	0.0652597	hsa-let-7b	ENSG00000172890	0	1	1	0	1	0	-0.0627216
hg19:22:20073635-20073656:+	FN1|2335	-0.625244	5.93e-05	0.0652597	hsa-mir-1306	ENSG00000115414	0	0	1	0	0	1	-0.132432
hg19:9:20716119-20716140:+	IDI2|91734	-0.625226	5.93e-05	0.0652597	hsa-mir-491	ENSG00000148377	1	0	0	1	0	0	0.147831
hg19:17:57918612-57918634:+	ZNF708|7562	-0.62521	5.93e-05	0.0652597	hsa-mir-21	ENSG00000182141	1	0	0	1	0	0	-0.312259
hg19:X:45605607-45605631:-	GBP6|163351	-0.62521	5.93e-05	0.0652597	hsa-mir-221	ENSG00000183347	0	0	1	0	0	1	-0.234398
hg19:11:64658673-64658696:-	FHL2|2274	-0.62521	5.93e-05	0.0652597	hsa-mir-192	ENSG00000115641	1	0	0	0	0	1	-0.220436
hg19:12:7073318-7073336:+	ALDH1L2|160428	-0.62521	5.93e-05	0.0652597	hsa-mir-141	ENSG00000136010	1	0	0	1	0	1	-0.189148
hg19:9:127454796-127454819:+	CCT3|7203	-0.62521	5.93e-05	0.0652597	hsa-mir-181a-2	ENSG00000163468	1	0	0	1	0	1	-0.0710529
hg19:13:92003010-92003031:+	UST|10090	-0.625135	5.95e-05	0.0654048	hsa-mir-18a	ENSG00000111962	1	0	0	1	0	0	-0.0894442
hg19:9:97847787-97847808:+	ZNF804A|91752	-0.625114	5.95e-05	0.0654197	hsa-mir-27b	ENSG00000170396	0	0	1	0	0	1	-0.286985
hg19:5:148810262-148810283:+	ADCY8|114	-0.625062	5.96e-05	0.0655048	hsa-mir-145	ENSG00000155897	0	0	1	0	0	1	-0.250435
hg19:14:101500141-101500164:+	MATN1|4146	-0.624977	5.98e-05	0.0655553	hsa-mir-495	ENSG00000162510	0	0	1	0	0	1	-0.138061
hg19:17:57918612-57918634:+	ZNF546|339327	-0.62493	5.99e-05	0.0655553	hsa-mir-21	ENSG00000187187	0	0	1	1	0	0	-0.462663
hg19:6:72113257-72113278:-	RANGAP1|5905	-0.62493	5.99e-05	0.0655553	hsa-mir-30a	ENSG00000100401	0	1	0	0	1	0	-0.381799
hg19:6:72086709-72086729:-	PSMD11|5717	-0.62493	5.99e-05	0.0655553	hsa-mir-30c-2	ENSG00000108671	1	0	0	1	0	0	-0.352331
hg19:5:148810264-148810285:+	CRB1|23418	-0.62493	5.99e-05	0.0655553	hsa-mir-145	ENSG00000134376	0	0	1	1	1	1	-0.296847
hg19:19:50004090-50004111:-	SGSM1|129049	-0.62493	5.99e-05	0.0655553	hsa-mir-150	ENSG00000167037	1	0	1	0	0	1	-0.293638
hg19:5:136983271-136983293:-	EFNA5|1946	-0.62493	5.99e-05	0.0655553	hsa-mir-874	ENSG00000184349	1	0	0	1	0	0	-0.271051
hg19:10:105154056-105154079:-	SEMA3G|56920	-0.62493	5.99e-05	0.0655553	hsa-mir-1307	ENSG00000010319	1	0	1	1	0	1	-0.200243
hg19:2:177015059-177015080:+	C4orf21|55345	-0.62493	5.99e-05	0.0655553	hsa-mir-10b	ENSG00000138658	1	0	1	0	0	1	0.0862754
hg19:14:100774250-100774271:+	ICAM5|7087	-0.624783	6.02e-05	0.0658076	hsa-mir-345	ENSG00000105376	0	0	1	0	1	0	-0.431174
hg19:17:57918633-57918654:+	PFKM|5213	-0.62465	6.05e-05	0.0658524	hsa-mir-21	ENSG00000152556	1	0	1	1	0	1	-0.425857
hg19:6:72086706-72086729:-	TTC39C|125488	-0.62465	6.05e-05	0.0658524	hsa-mir-30c-2	ENSG00000168234	0	0	1	0	0	1	-0.420206
hg19:17:19247826-19247848:-	MICAL1|64780	-0.62465	6.05e-05	0.0658524	hsa-mir-1180	ENSG00000135596	0	1	0	0	0	1	-0.40805
hg19:1:110141562-110141583:+	ARHGEF17|9828	-0.62465	6.05e-05	0.0658524	hsa-mir-197	ENSG00000110237	1	0	1	0	0	1	-0.32141
hg19:19:50004091-50004113:-	EPM2AIP1|9852	-0.62465	6.05e-05	0.0658524	hsa-mir-150	ENSG00000178567	1	0	0	1	0	0	-0.186866
hg19:16:69967047-69967069:+	RP1|6101	-0.62465	6.05e-05	0.0658524	hsa-mir-140	ENSG00000104237	0	0	1	0	0	1	-0.172565
hg19:22:20020711-20020731:+	JPH2|57158	-0.62465	6.05e-05	0.0658524	hsa-mir-185	ENSG00000149596	0	0	1	0	1	1	-0.109831
hg19:22:46509574-46509592:+	IGF2BP2|10644	-0.624572	6.07e-05	0.0659984	hsa-let-7b	ENSG00000073792	1	0	1	1	0	0	-0.186816
hg19:17:28444115-28444137:+	KIAA1522|57648	-0.62455	6.07e-05	0.0660155	hsa-mir-423	ENSG00000162522	0	0	1	1	0	1	-0.0497273
hg19:21:17911420-17911440:+	SV2C|22987	-0.624547	6.07e-05	0.0660156	hsa-mir-99a	ENSG00000122012	1	0	1	0	0	1	-0.256213
hg19:14:102026699-102026721:-	TIGD6|81789	-0.624536	6.08e-05	0.0660341	hsa-mir-1247	ENSG00000164296	0	1	0	0	1	0	-0.286693
hg19:14:100576054-100576075:+	PAOX|196743	-0.624533	6.08e-05	0.0660392	hsa-mir-342	ENSG00000148832	1	0	1	1	0	1	0.0208671
hg19:14:101528393-101528415:+	NPNT|255743	-0.624485	6.09e-05	0.0661294	hsa-mir-377	ENSG00000168743	1	0	0	1	0	1	-0.0474942
hg19:19:52196503-52196520:+	TBC1D29|26083	-0.624458	6.09e-05	0.0661453	hsa-mir-125a	ENSG00000266733	0	1	0	0	1	0	-0.202051
hg19:12:7072910-7072927:+	DDX52|11056	-0.624382	6.11e-05	0.0661453	hsa-mir-200c	ENSG00000141141	1	1	1	1	0	0	-0.104462
hg19:9:97847745-97847767:+	CELF2|10659	-0.62437	6.11e-05	0.0661453	hsa-mir-27b	ENSG00000048740	1	0	0	1	0	0	-0.433571
hg19:7:130135967-130135989:+	BTBD10|84280	-0.62437	6.11e-05	0.0661453	hsa-mir-335	ENSG00000148925	1	0	1	0	0	1	-0.302758
hg19:8:135817122-135817144:-	PSMD1|5707	-0.62437	6.11e-05	0.0661453	hsa-mir-30d	ENSG00000173692	1	0	1	0	0	1	-0.288865
hg19:11:57408725-57408747:+	RUNX3|864	-0.62437	6.11e-05	0.0661453	hsa-mir-130a	ENSG00000020633	0	0	1	1	0	0	-0.265813
hg19:2:219267380-219267402:+	IKZF1|10320	-0.62437	6.11e-05	0.0661453	hsa-mir-26b	ENSG00000185811	1	0	0	1	0	0	-0.0563281
hg19:5:148441938-148441958:-	C14orf79|122616	-0.624361	6.11e-05	0.06616	hsa-mir-584	ENSG00000140104	1	0	0	0	1	0	-0.00698207
hg19:9:97847547-97847568:+	CDH6|1004	-0.624273	6.13e-05	0.0662998	hsa-mir-23b	ENSG00000113361	1	0	0	1	0	0	-0.439751
hg19:17:29887035-29887054:+	GLUL|2752	-0.624273	6.13e-05	0.0662998	hsa-mir-193a	ENSG00000135821	0	0	1	1	0	1	0.0411197
hg19:12:54731062-54731081:+	TECPR2|9895	-0.624259	6.13e-05	0.0663256	hsa-mir-148b	ENSG00000196663	1	0	0	1	0	1	-0.081038
hg19:12:54731062-54731081:+	IQSEC2|23096	-0.624259	6.13e-05	0.0663256	hsa-mir-148b	ENSG00000124313	1	0	0	0	0	1	0.0221099
hg19:7:129410285-129410304:-	EGFLAM|133584	-0.624255	6.14e-05	0.0663298	hsa-mir-182	ENSG00000164318	0	1	0	1	1	1	-0.0622458
hg19:3:168269702-168269723:+	SAMD5|389432	-0.62409	6.17e-05	0.0664325	hsa-mir-551b	ENSG00000203727	1	0	0	1	0	0	-0.520317
hg19:1:207975248-207975269:-	VCAN|1462	-0.62409	6.17e-05	0.0664325	hsa-mir-29c	ENSG00000038427	0	0	1	0	0	1	-0.393055
hg19:1:207975246-207975268:-	MAP4K4|9448	-0.62409	6.17e-05	0.0664325	hsa-mir-29c	ENSG00000071054	0	1	0	0	0	1	-0.366015
hg19:13:92003615-92003638:+	PRCP|5547	-0.62409	6.17e-05	0.0664325	hsa-mir-92a-1	ENSG00000137509	0	1	0	0	0	1	-0.360676
hg19:X:133675395-133675416:-	GM2A|2760	-0.62409	6.17e-05	0.0664325	hsa-mir-542	ENSG00000196743	1	0	0	1	0	0	-0.326926
hg19:12:7073318-7073342:+	CACNA1C|775	-0.62409	6.17e-05	0.0664325	hsa-mir-141	ENSG00000151067	0	0	1	0	0	1	-0.248014
hg19:3:49057633-49057655:-	NFIA|4774	-0.62409	6.17e-05	0.0664325	hsa-mir-425	ENSG00000162599	0	0	1	0	0	1	-0.22864
hg19:17:79099726-79099747:+	VDR|7421	-0.62409	6.17e-05	0.0664325	hsa-mir-3065	ENSG00000111424	1	0	1	1	0	0	-0.215533
hg19:17:56408604-56408626:-	TUBG2|27175	-0.624081	6.17e-05	0.0664496	hsa-mir-142	ENSG00000037042	0	0	1	0	0	1	-0.301671
hg19:7:129410287-129410305:-	RFTN1|23180	-0.623975	6.2e-05	0.066622	hsa-mir-182	ENSG00000131378	0	0	1	1	0	0	-0.374992
hg19:17:28444148-28444168:+	RHBDL3|162494	-0.623931	6.21e-05	0.0666977	hsa-mir-423	ENSG00000141314	1	0	0	1	0	0	0.00111099
hg19:9:131007028-131007047:-	RPS6|6194	-0.623879	6.22e-05	0.0667367	hsa-mir-199b	ENSG00000137154	1	0	0	0	0	1	-0.101068
hg19:3:52302296-52302317:-	FBLN2|2199	-0.62381	6.23e-05	0.0667367	hsa-let-7g	ENSG00000163520	0	0	1	0	0	1	-0.415526
hg19:7:130561507-130561530:-	FRMD4A|55691	-0.62381	6.23e-05	0.0667367	hsa-mir-29a	ENSG00000151474	1	0	0	1	1	1	-0.399309
hg19:3:49057633-49057655:-	CELF6|60677	-0.62381	6.23e-05	0.0667367	hsa-mir-425	ENSG00000140488	1	1	1	1	0	0	-0.188884
hg19:9:111808553-111808574:-	DNPEP|23549	-0.62381	6.23e-05	0.0667367	hsa-mir-32	ENSG00000123992	0	1	0	0	1	0	-0.0465198
hg19:1:209605511-209605532:+	INPP5F|22876	-0.62381	6.23e-05	0.0667367	hsa-mir-205	ENSG00000198825	1	0	0	1	0	1	-0.00240722
hg19:8:22102487-22102505:-	IGF2BP2|10644	-0.623798	6.23e-05	0.0667533	hsa-mir-320a	ENSG00000073792	1	0	0	0	0	1	-0.258608
hg19:6:72113256-72113278:-	NFE2L3|9603	-0.623713	6.25e-05	0.0668852	hsa-mir-30a	ENSG00000050344	0	0	1	0	0	1	-0.637626
hg19:7:129410286-129410311:-	ANKH|56172	-0.623713	6.25e-05	0.0668852	hsa-mir-182	ENSG00000154122	1	0	0	1	0	0	-0.379839
hg19:17:57918671-57918693:+	NFYB|4801	-0.623703	6.26e-05	0.0668953	hsa-mir-21	ENSG00000120837	1	0	1	1	0	1	-0.0489351
hg19:17:1617209-1617230:-	ZNF639|51193	-0.623573	6.28e-05	0.0670248	hsa-mir-22	ENSG00000121864	0	0	1	0	0	1	-0.276564
hg19:5:159912379-159912400:+	BTNL9|153579	-0.623529	6.29e-05	0.0670248	hsa-mir-146a	ENSG00000165810	1	0	0	1	0	0	-0.527905
hg19:11:64658674-64658696:-	MAP1B|4131	-0.623529	6.29e-05	0.0670248	hsa-mir-192	ENSG00000131711	1	0	0	0	0	1	-0.451093
hg19:X:85158645-85158669:-	PHF17|79960	-0.623529	6.29e-05	0.0670248	hsa-mir-361	ENSG00000077684	1	0	0	1	1	1	-0.374024
hg19:X:45606444-45606463:-	DCAF12|25853	-0.623529	6.29e-05	0.0670248	hsa-mir-222	ENSG00000198876	0	1	0	1	0	0	-0.364942
hg19:12:7073318-7073338:+	MAP1A|4130	-0.623529	6.29e-05	0.0670248	hsa-mir-141	ENSG00000166963	0	1	1	0	0	1	-0.234256
hg19:9:116971767-116971787:+	FAM153A|285596	-0.623529	6.29e-05	0.0670248	hsa-mir-455	ENSG00000170074	1	0	0	1	0	0	-0.218622
hg19:X:133675395-133675417:-	SRD5A1|6715	-0.623529	6.29e-05	0.0670248	hsa-mir-542	ENSG00000145545	0	1	0	1	0	1	-0.214559
hg19:X:133675395-133675417:-	ARSB|411	-0.623529	6.29e-05	0.0670248	hsa-mir-542	ENSG00000113273	0	0	1	1	0	1	-0.194457
hg19:9:97847745-97847766:+	TRAF3IP3|80342	-0.623529	6.29e-05	0.0670248	hsa-mir-27b	ENSG00000009790	0	0	1	1	1	0	-0.171323
hg19:3:49057633-49057655:-	TTLL3|26140	-0.623529	6.29e-05	0.0670248	hsa-mir-425	ENSG00000214021	1	1	1	0	1	1	-0.102694
hg19:13:92002875-92002895:+	B4GALT4|8702	-0.623511	6.3e-05	0.0670541	hsa-mir-17	ENSG00000121578	1	0	0	0	1	1	-0.0481518
hg19:X:133304274-133304294:-	B4GALT4|8702	-0.623511	6.3e-05	0.0670541	hsa-mir-106a	ENSG00000121578	1	0	0	0	1	0	-0.0481518
hg19:17:1617209-1617230:-	MLLT6|4302	-0.623433	6.32e-05	0.0671818	hsa-mir-22	ENSG00000108292	1	0	0	1	0	1	-0.39925
hg19:9:97848307-97848329:+	AGPS|8540	-0.623433	6.32e-05	0.0671818	hsa-mir-24-1	ENSG00000018510	1	0	0	1	0	0	-0.349548
hg19:2:177015057-177015079:+	CEP76|79959	-0.623433	6.32e-05	0.0671818	hsa-mir-10b	ENSG00000101624	1	0	0	0	0	1	-0.149652
hg19:2:207974766-207974788:-	NCL|4691	-0.623433	6.32e-05	0.0671818	hsa-mir-2355	ENSG00000115053	0	0	1	1	0	0	-0.120293
hg19:5:148441938-148441958:-	MYO15A|51168	-0.623424	6.32e-05	0.0671951	hsa-mir-584	ENSG00000091536	0	1	1	0	0	1	-0.124462
hg19:11:122022985-122023004:-	DCTN1|1639	-0.62338	6.33e-05	0.0672693	hsa-mir-100	ENSG00000204843	0	1	0	0	1	0	-0.21327
hg19:3:49057632-49057653:-	EMID1|129080	-0.623353	6.33e-05	0.0673218	hsa-mir-425	ENSG00000186998	0	1	0	0	0	1	-0.181221
hg19:10:104196276-104196297:+	ABCA9|10350	-0.623318	6.34e-05	0.0673218	hsa-mir-146b	ENSG00000154258	0	0	1	1	0	0	-0.140835
hg19:15:89151352-89151373:+	PLAG1|5324	-0.623275	6.35e-05	0.0673218	hsa-mir-1179	ENSG00000181690	1	0	0	1	1	0	-0.365546
hg19:9:73424947-73424969:-	CELSR3|1951	-0.623249	6.36e-05	0.0673218	hsa-mir-204	ENSG00000008300	1	0	1	1	0	1	-0.427672
hg19:3:52302296-52302317:-	FLNC|2318	-0.623249	6.36e-05	0.0673218	hsa-let-7g	ENSG00000128591	1	0	1	0	0	1	-0.390988
hg19:5:159912379-159912400:+	SCN5A|6331	-0.623249	6.36e-05	0.0673218	hsa-mir-146a	ENSG00000183873	1	0	1	1	0	1	-0.355624
hg19:19:52196521-52196545:+	APOD|347	-0.623249	6.36e-05	0.0673218	hsa-mir-125a	ENSG00000189058	0	1	0	0	1	0	-0.287224
hg19:17:28444150-28444172:+	GFRA1|2674	-0.623249	6.36e-05	0.0673218	hsa-mir-423	ENSG00000151892	1	0	0	1	0	0	-0.262548
hg19:3:160122395-160122416:+	GYPC|2995	-0.623249	6.36e-05	0.0673218	hsa-mir-15b	ENSG00000136732	0	1	1	0	0	1	-0.201982
hg19:2:177015057-177015076:+	TAF13|6884	-0.623249	6.36e-05	0.0673218	hsa-mir-10b	ENSG00000197780	1	0	0	0	0	1	-0.0151539
hg19:16:67236233-67236252:-	C14orf132|56967	-0.623197	6.37e-05	0.0674165	hsa-mir-328	ENSG00000227051	0	1	1	0	1	0	-0.198782
hg19:19:46142268-46142289:-	EPN2|22905	-0.623176	6.37e-05	0.0674498	hsa-mir-330	ENSG00000072134	0	1	0	1	0	0	-0.0553908
hg19:9:97848344-97848366:-	KCNN4|3783	-0.623153	6.38e-05	0.0674709	hsa-mir-3074	ENSG00000104783	0	0	1	0	1	1	-0.471303
hg19:7:25989581-25989602:-	BMP1|649	-0.623091	6.39e-05	0.0675796	hsa-mir-148a	ENSG00000168487	1	0	1	1	0	1	-0.32152
hg19:12:7073276-7073297:+	HGF|3082	-0.623056	6.4e-05	0.067584	hsa-mir-141	ENSG00000019991	1	0	0	1	1	1	-0.251565
hg19:17:29887071-29887091:+	LHX4|89884	-0.623054	6.4e-05	0.067584	hsa-mir-193a	ENSG00000121454	1	0	0	1	0	0	0.0286027
hg19:17:79099688-79099710:-	EPHA10|284656	-0.622975	6.42e-05	0.067584	hsa-mir-338	ENSG00000183317	1	0	1	1	0	1	-0.0995965
hg19:17:46114540-46114561:-	GABRB2|2561	-0.622969	6.42e-05	0.067584	hsa-mir-152	ENSG00000145864	1	0	0	0	1	0	-0.544866
hg19:1:155165028-155165048:+	IGDCC3|9543	-0.622969	6.42e-05	0.067584	hsa-mir-92b	ENSG00000174498	0	1	1	0	0	1	-0.333978
hg19:17:1617207-1617230:-	FAM184A|79632	-0.622969	6.42e-05	0.067584	hsa-mir-22	ENSG00000111879	0	0	1	0	0	1	-0.31628
hg19:10:105154058-105154080:-	TIMP3|7078	-0.622969	6.42e-05	0.067584	hsa-mir-1307	ENSG00000100234	1	0	0	0	1	1	-0.249319
hg19:X:85158646-85158669:-	ZNF512|84450	-0.622969	6.42e-05	0.067584	hsa-mir-361	ENSG00000243943	1	0	1	0	1	0	-0.155525
hg19:X:133680710-133680732:-	UBE2N|7334	-0.622969	6.42e-05	0.067584	hsa-mir-424	ENSG00000177889	1	0	0	1	0	0	-0.144974
hg19:12:7073255-7073276:+	ENAM|10117	-0.622952	6.42e-05	0.0676145	hsa-mir-141	ENSG00000132464	0	0	1	0	0	1	-0.243862
hg19:15:55665152-55665174:-	SEZ6L2|26470	-0.622888	6.44e-05	0.0677298	hsa-mir-628	ENSG00000174938	0	0	1	0	0	1	-0.0826117
hg19:9:20716120-20716141:+	SV2C|22987	-0.622825	6.45e-05	0.0678237	hsa-mir-491	ENSG00000122012	0	1	0	0	0	1	-0.418191
hg19:6:52013786-52013806:+	RHOBTB2|23221	-0.622808	6.45e-05	0.0678516	hsa-mir-133b	ENSG00000008853	0	1	0	0	0	1	-0.0648189
hg19:7:25989542-25989561:-	KIAA1875|340390	-0.622755	6.47e-05	0.0678798	hsa-mir-148a	ENSG00000179698	1	0	1	1	0	1	-0.147888
hg19:5:136983269-136983293:-	KLF16|83855	-0.622733	6.47e-05	0.0678798	hsa-mir-874	ENSG00000129911	1	0	0	1	0	0	-0.259521
hg19:7:99691687-99691707:-	AGBL3|340351	-0.62271	6.48e-05	0.0678798	hsa-mir-106b	ENSG00000146856	0	0	1	0	0	1	-0.031882
hg19:17:28444149-28444171:+	LRRN4CL|221091	-0.622689	6.48e-05	0.0678798	hsa-mir-423	ENSG00000177363	0	1	0	0	0	1	-0.354784
hg19:17:29887035-29887057:+	TGFA|7039	-0.622689	6.48e-05	0.0678798	hsa-mir-193a	ENSG00000163235	1	0	0	1	0	0	-0.353712
hg19:11:64658674-64658696:-	C14orf132|56967	-0.622689	6.48e-05	0.0678798	hsa-mir-192	ENSG00000227051	1	0	0	0	1	1	-0.311465
hg19:3:188406622-188406642:+	STRADB|55437	-0.622689	6.48e-05	0.0678798	hsa-mir-28	ENSG00000082146	0	0	1	0	1	0	-0.290456
hg19:21:17911422-17911442:+	PTPRK|5796	-0.622689	6.48e-05	0.0678798	hsa-mir-99a	ENSG00000152894	1	0	0	0	0	1	-0.275569
hg19:2:177015057-177015076:+	ACACA|31	-0.622689	6.48e-05	0.0678798	hsa-mir-10b	ENSG00000132142	1	1	1	1	1	1	-0.00378548
hg19:2:207974767-207974788:-	RSBN1|54665	-0.622689	6.48e-05	0.0678798	hsa-mir-2355	ENSG00000081019	1	0	0	1	0	1	-0.00364871
hg19:5:148808538-148808559:+	CTTN|2017	-0.622657	6.49e-05	0.0679422	hsa-mir-143	ENSG00000085733	1	0	1	1	0	1	0.0559322
hg19:11:57408725-57408746:+	ATP6V1B2|526	-0.622593	6.5e-05	0.0680397	hsa-mir-130a	ENSG00000147416	0	0	1	1	0	1	-0.392432
hg19:17:1617211-1617229:-	RNF183|138065	-0.622529	6.52e-05	0.0681648	hsa-mir-22	ENSG00000165188	0	1	0	0	1	0	0.034315
hg19:X:133675397-133675416:-	ALDH1A3|220	-0.622453	6.54e-05	0.0681801	hsa-mir-542	ENSG00000184254	0	1	0	0	0	1	-0.342984
hg19:1:71533365-71533387:-	TUBB6|84617	-0.622439	6.54e-05	0.0681801	hsa-mir-186	ENSG00000176014	1	1	0	0	0	1	0.0100345
hg19:9:97847787-97847809:+	GM2A|2760	-0.622409	6.55e-05	0.0681801	hsa-mir-27b	ENSG00000196743	1	0	0	1	1	1	-0.381595
hg19:X:85158649-85158671:-	HLF|3131	-0.622409	6.55e-05	0.0681801	hsa-mir-361	ENSG00000108924	1	0	0	1	0	0	-0.317202
hg19:17:57918617-57918634:+	SCNN1G|6340	-0.622409	6.55e-05	0.0681801	hsa-mir-21	ENSG00000166828	0	0	1	1	0	1	-0.294979
hg19:9:96941123-96941145:+	ADPRH|141	-0.622409	6.55e-05	0.0681801	hsa-let-7d	ENSG00000144843	0	1	0	1	0	0	-0.234286
hg19:17:28444113-28444136:+	FEZ1|9638	-0.622409	6.55e-05	0.0681801	hsa-mir-423	ENSG00000149557	0	0	1	1	1	1	-0.233147
hg19:X:49767810-49767832:+	ZFPM2|23414	-0.622409	6.55e-05	0.0681801	hsa-mir-532	ENSG00000169946	0	1	0	0	0	1	-0.185023
hg19:5:58999456-58999478:-	PRKD2|25865	-0.622409	6.55e-05	0.0681801	hsa-mir-582	ENSG00000105287	1	0	1	0	0	1	-0.182399
hg19:7:102046196-102046217:-	BTBD16|118663	-0.622389	6.55e-05	0.0682189	hsa-mir-548o	ENSG00000138152	0	0	1	0	0	1	-0.452326
hg19:7:99691399-99691421:-	MOXD1|26002	-0.622349	6.56e-05	0.0682955	hsa-mir-93	ENSG00000079931	1	0	0	0	0	1	-0.0583909
hg19:1:71533363-71533385:-	MAFF|23764	-0.622307	6.57e-05	0.0683528	hsa-mir-186	ENSG00000185022	0	0	1	1	0	0	-0.114482
hg19:5:148441938-148441958:-	SLC25A42|284439	-0.62226	6.58e-05	0.0684296	hsa-mir-584	ENSG00000181035	1	0	0	1	1	0	0.156229
hg19:2:177015096-177015116:+	ERBB3|2065	-0.622227	6.59e-05	0.0684407	hsa-mir-10b	ENSG00000065361	1	1	0	0	0	1	-0.156594
hg19:6:72113299-72113320:-	GPN1|11321	-0.622216	6.59e-05	0.0684407	hsa-mir-30a	ENSG00000198522	1	0	1	0	0	1	-0.24677
hg19:10:105154059-105154079:-	FLII|2314	-0.622201	6.59e-05	0.0684407	hsa-mir-1307	ENSG00000177731	1	0	1	0	0	1	0.0158726
hg19:17:57918672-57918692:+	TBCE|6905	-0.622129	6.61e-05	0.0684407	hsa-mir-21	ENSG00000116957	0	0	1	0	0	1	-0.520672
hg19:X:85158648-85158669:-	DCAF8|50717	-0.622129	6.61e-05	0.0684407	hsa-mir-361	ENSG00000132716	0	0	1	1	0	0	-0.324474
hg19:9:97847745-97847767:+	INA|9118	-0.622129	6.61e-05	0.0684407	hsa-mir-27b	ENSG00000148798	1	0	0	1	0	0	-0.252787
hg19:11:64658673-64658696:-	COL22A1|169044	-0.622129	6.61e-05	0.0684407	hsa-mir-192	ENSG00000169436	0	0	1	1	0	1	-0.169387
hg19:9:116971767-116971786:+	ZNF433|163059	-0.622129	6.61e-05	0.0684407	hsa-mir-455	ENSG00000197647	1	0	1	0	0	1	-0.0965596
hg19:17:1617207-1617227:-	BTBD16|118663	-0.622107	6.61e-05	0.0684801	hsa-mir-22	ENSG00000138152	0	0	1	0	0	1	-0.501672
hg19:7:129410287-129410307:-	AGBL3|340351	-0.622034	6.63e-05	0.0686034	hsa-mir-182	ENSG00000146856	0	1	0	1	0	1	0.0121139
hg19:X:85158647-85158670:-	LGI4|163175	-0.622011	6.64e-05	0.0686409	hsa-mir-361	ENSG00000153902	1	1	0	1	0	1	-0.0259751
hg19:10:104196314-104196332:+	ACACA|31	-0.621956	6.65e-05	0.0687469	hsa-mir-146b	ENSG00000132142	0	1	1	0	0	1	-0.135386
hg19:1:155165027-155165050:+	CAPS|828	-0.621952	6.65e-05	0.0687557	hsa-mir-92b	ENSG00000105519	1	0	0	0	1	0	-0.111895
hg19:19:13947411-13947429:-	TXNDC15|79770	-0.621892	6.66e-05	0.0687778	hsa-mir-23a	ENSG00000113621	1	1	0	1	1	1	-0.114289
hg19:14:101351087-101351109:+	ZNF660|285349	-0.621874	6.67e-05	0.0687778	hsa-mir-136	ENSG00000144792	1	0	0	1	0	0	-0.154398
hg19:16:69967045-69967065:+	HCN3|57657	-0.621849	6.67e-05	0.0687778	hsa-mir-140	ENSG00000263324	1	0	1	0	0	1	-0.316179
hg19:14:101506606-101506626:+	CLCN2|1181	-0.621849	6.67e-05	0.0687778	hsa-mir-654	ENSG00000114859	1	0	1	0	0	1	-0.305505
hg19:19:52196521-52196544:+	TSPAN11|441631	-0.621849	6.67e-05	0.0687778	hsa-mir-125a	ENSG00000110900	1	0	0	1	0	1	-0.268526
hg19:9:97847745-97847767:+	INPP4B|8821	-0.621849	6.67e-05	0.0687778	hsa-mir-27b	ENSG00000109452	1	0	0	1	1	1	-0.219019
hg19:15:70371764-70371787:-	SAP30BP|29115	-0.621849	6.67e-05	0.0687778	hsa-mir-629	ENSG00000161526	1	0	0	1	0	1	0.0123106
hg19:X:45605612-45605631:-	CYP4F3|4051	-0.621833	6.68e-05	0.0688056	hsa-mir-221	ENSG00000186529	0	0	1	0	0	1	-0.0976946
hg19:17:57918672-57918691:+	LOXHD1|125336	-0.621671	6.72e-05	0.0691011	hsa-mir-21	ENSG00000167210	0	0	1	0	0	1	-0.253663
hg19:17:1953261-1953281:-	HEMK1|51409	-0.621653	6.72e-05	0.0691155	hsa-mir-132	ENSG00000114735	1	1	0	1	0	0	-0.00187647
hg19:17:46657268-46657289:-	STK33|65975	-0.621569	6.74e-05	0.0691155	hsa-mir-10a	ENSG00000130413	0	1	1	0	1	0	-0.233058
hg19:X:133680673-133680695:-	SH3TC2|79628	-0.621569	6.74e-05	0.0691155	hsa-mir-424	ENSG00000169247	1	0	0	0	0	1	-0.0221187
hg19:10:105154057-105154079:-	MTERFD2|130916	-0.621569	6.74e-05	0.0691155	hsa-mir-1307	ENSG00000122085	1	0	1	0	1	0	0.00669753
hg19:9:73424948-73424969:-	TMPRSS6|164656	-0.621487	6.76e-05	0.0692624	hsa-mir-204	ENSG00000187045	0	0	1	0	0	1	-0.55914
hg19:1:41220086-41220108:+	SRRM4|84530	-0.621435	6.77e-05	0.0693404	hsa-mir-30e	ENSG00000139767	1	0	0	1	0	1	0.146227
hg19:12:54731023-54731046:+	DSCC1|79075	-0.621369	6.79e-05	0.0694207	hsa-mir-148b	ENSG00000136982	1	0	0	1	0	1	0.0209986
hg19:5:159912378-159912401:+	SLC38A11|151258	-0.621335	6.8e-05	0.0694207	hsa-mir-146a	ENSG00000169507	0	1	0	1	0	1	-0.0908527
hg19:5:168195216-168195237:-	TTC39A|22996	-0.621289	6.81e-05	0.0694207	hsa-mir-218-2	ENSG00000085831	0	1	0	1	0	0	-0.449401
hg19:11:79113076-79113097:-	RINL|126432	-0.621289	6.81e-05	0.0694207	hsa-mir-708	ENSG00000187994	1	0	0	1	0	0	-0.312529
hg19:12:7073318-7073342:+	ECM2|1842	-0.621289	6.81e-05	0.0694207	hsa-mir-141	ENSG00000106823	1	0	0	0	0	1	-0.298373
hg19:8:135812815-135812835:-	HOXC4|3221	-0.621289	6.81e-05	0.0694207	hsa-mir-30b	ENSG00000198353	1	0	0	0	1	0	-0.288732
hg19:X:85158648-85158669:-	SPEF2|79925	-0.621289	6.81e-05	0.0694207	hsa-mir-361	ENSG00000152582	1	0	0	0	0	1	-0.252379
hg19:12:7073318-7073338:+	ITPR1|3708	-0.621289	6.81e-05	0.0694207	hsa-mir-141	ENSG00000150995	0	0	1	1	0	1	-0.0406141
hg19:7:25989546-25989564:-	ANKS6|203286	-0.62126	6.81e-05	0.0694768	hsa-mir-148a	ENSG00000165138	1	0	0	1	0	1	-0.377098
hg19:8:10892734-10892753:-	SEC16B|89866	-0.621174	6.83e-05	0.0696286	hsa-mir-598	ENSG00000120341	0	0	1	0	0	1	0.0178674
hg19:7:130561506-130561530:-	PTPRT|11122	-0.621173	6.83e-05	0.0696295	hsa-mir-29a	ENSG00000196090	1	0	0	1	0	1	-0.0918791
hg19:19:52196560-52196580:+	ZNF174|7727	-0.621117	6.85e-05	0.0697039	hsa-mir-125a	ENSG00000103343	0	0	1	0	0	1	0.0541187
hg19:7:129414811-129414829:-	RNF157|114804	-0.621095	6.85e-05	0.0697039	hsa-mir-183	ENSG00000141576	1	0	0	1	0	0	-0.150122
hg19:14:101351053-101351074:+	CLPTM1|1209	-0.621052	6.86e-05	0.0697039	hsa-mir-136	ENSG00000104853	0	0	1	0	0	1	-0.273555
hg19:5:159912378-159912401:+	FLT1|2321	-0.62101	6.87e-05	0.0697039	hsa-mir-146a	ENSG00000102755	1	0	0	1	0	1	-0.161103
hg19:X:133675394-133675416:-	CELF2|10659	-0.621008	6.87e-05	0.0697039	hsa-mir-542	ENSG00000048740	1	0	0	1	0	1	-0.397789
hg19:X:49767773-49767794:+	SLC22A17|51310	-0.621008	6.87e-05	0.0697039	hsa-mir-532	ENSG00000092096	0	0	1	0	0	1	-0.335235
hg19:9:131007023-131007046:-	CEP76|79959	-0.621008	6.87e-05	0.0697039	hsa-mir-199b	ENSG00000101624	1	0	1	0	0	1	-0.326914
hg19:1:110141562-110141583:+	FLT1|2321	-0.621008	6.87e-05	0.0697039	hsa-mir-197	ENSG00000102755	0	0	1	0	0	1	-0.217951
hg19:10:105154057-105154079:-	SCN5A|6331	-0.621008	6.87e-05	0.0697039	hsa-mir-1307	ENSG00000183873	1	0	1	1	1	1	-0.209511
hg19:6:72113259-72113278:-	DOCK10|55619	-0.621008	6.87e-05	0.0697039	hsa-mir-30a	ENSG00000135905	0	0	1	1	0	1	-0.0845775
hg19:7:5535504-5535526:-	FAM167A|83648	-0.621008	6.87e-05	0.0697039	hsa-mir-589	ENSG00000154319	0	1	0	0	1	1	-0.0725614
hg19:2:219267380-219267402:+	FLT3|2322	-0.621008	6.87e-05	0.0697039	hsa-mir-26b	ENSG00000122025	1	0	0	0	0	1	-0.0608017
hg19:17:56408611-56408628:-	ZNF454|285676	-0.620992	6.88e-05	0.0697355	hsa-mir-142	ENSG00000178187	0	0	1	1	0	0	-0.310133
hg19:10:104196281-104196300:+	SYNGR1|9145	-0.620961	6.88e-05	0.069795	hsa-mir-146b	ENSG00000100321	1	0	0	1	0	0	-0.312831
hg19:9:97848307-97848328:+	KSR2|283455	-0.620936	6.89e-05	0.069838	hsa-mir-24-1	ENSG00000171435	1	0	0	0	0	1	0.0129581
hg19:17:27188604-27188623:-	MET|4233	-0.62092	6.89e-05	0.0698634	hsa-mir-144	ENSG00000105976	1	0	1	0	0	1	-0.155152
hg19:7:25989543-25989565:-	BCAM|4059	-0.620849	6.91e-05	0.0699714	hsa-mir-148a	ENSG00000187244	1	0	0	0	0	1	0.0189009
hg19:19:50004090-50004111:-	DGCR2|9993	-0.620728	6.94e-05	0.0699946	hsa-mir-150	ENSG00000070413	1	0	0	1	1	1	-0.170161
hg19:X:135633087-135633109:+	ADD3|120	-0.620671	6.95e-05	0.070109	hsa-mir-934	ENSG00000148700	0	0	1	0	0	1	-0.234878
hg19:X:151127056-151127078:-	CDHR1|92211	-0.620646	6.96e-05	0.070161	hsa-mir-224	ENSG00000148600	1	0	0	1	0	0	0.00270674
hg19:12:95702216-95702239:+	COL21A1|81578	-0.620555	6.98e-05	0.0703098	hsa-mir-331	ENSG00000124749	0	0	1	0	1	0	-0.0457346
hg19:10:104196314-104196332:+	SUSD1|64420	-0.620552	6.98e-05	0.0703098	hsa-mir-146b	ENSG00000106868	0	0	1	0	0	1	-0.0786942
hg19:22:22007605-22007625:+	EXOSC8|11340	-0.620533	6.99e-05	0.0703098	hsa-mir-130b	ENSG00000120699	0	1	0	1	0	1	-0.121868
hg19:7:150935535-150935560:+	JAM3|83700	-0.620529	6.99e-05	0.0703098	hsa-mir-671	ENSG00000166086	1	0	0	1	0	1	-0.048985
hg19:11:64658675-64658696:-	CLCA2|9635	-0.620492	7e-05	0.0703098	hsa-mir-192	ENSG00000137975	1	0	0	0	0	1	-0.259879
hg19:17:1617209-1617230:-	ZNF594|84622	-0.620492	7e-05	0.0703098	hsa-mir-22	ENSG00000180626	1	0	0	0	0	1	-0.0606693
hg19:19:13947409-13947429:-	FER|2241	-0.620492	7e-05	0.0703098	hsa-mir-23a	ENSG00000151422	1	0	0	1	0	0	0.1723
hg19:17:79099726-79099747:+	STEAP3|55240	-0.620448	7.01e-05	0.0703098	hsa-mir-3065	ENSG00000115107	0	0	1	0	0	1	-0.247893
hg19:13:92002871-92002893:+	ACPL2|92370	-0.620448	7.01e-05	0.0703098	hsa-mir-17	ENSG00000155893	0	0	1	1	0	1	-0.193836
hg19:X:85158648-85158669:-	SALL2|6297	-0.620448	7.01e-05	0.0703098	hsa-mir-361	ENSG00000165821	0	1	0	1	1	1	-0.181849
hg19:16:69967045-69967065:+	HIBCH|26275	-0.620448	7.01e-05	0.0703098	hsa-mir-140	ENSG00000198130	1	0	1	0	0	1	-0.181088
hg19:9:97847745-97847766:+	ETV7|51513	-0.620448	7.01e-05	0.0703098	hsa-mir-27b	ENSG00000010030	0	1	1	1	0	1	-0.154611
hg19:17:1953259-1953281:-	ZNF526|116115	-0.620429	7.01e-05	0.0703433	hsa-mir-132	ENSG00000167625	1	0	0	0	1	0	-0.180734
hg19:5:148441935-148441958:-	ZNF334|55713	-0.620419	7.02e-05	0.070362	hsa-mir-584	ENSG00000198185	0	1	1	0	1	1	-0.0895993
hg19:6:30552109-30552129:+	FAM111B|374393	-0.620391	7.02e-05	0.0704126	hsa-mir-877	ENSG00000189057	1	0	0	0	0	1	0.0231705
hg19:X:49767774-49767796:+	IFT140|9742	-0.620359	7.03e-05	0.0704652	hsa-mir-532	ENSG00000187535	1	1	1	0	1	1	0.0148869
hg19:1:1104440-1104457:+	TRIM59|286827	-0.620336	7.04e-05	0.0704922	hsa-mir-429	ENSG00000213186	1	0	0	0	0	1	-0.11828
hg19:19:50004088-50004111:-	CELF4|56853	-0.620333	7.04e-05	0.0704949	hsa-mir-150	ENSG00000101489	1	1	1	0	0	1	-0.19839
hg19:5:148808540-148808558:+	ASB16|92591	-0.62029	7.05e-05	0.0705834	hsa-mir-143	ENSG00000161664	0	0	1	0	0	1	0.0562183
hg19:9:97847745-97847766:+	BCL2L14|79370	-0.620289	7.05e-05	0.0705848	hsa-mir-27b	ENSG00000121380	1	0	1	1	0	1	-0.261444
hg19:1:71533364-71533383:-	RNF183|138065	-0.62027	7.05e-05	0.0706188	hsa-mir-186	ENSG00000165188	0	1	0	0	0	1	0.0608696
hg19:19:52196560-52196580:+	PPFIBP2|8495	-0.620246	7.06e-05	0.0706216	hsa-mir-125a	ENSG00000166387	1	0	1	1	1	1	0.036564
hg19:1:41220085-41220105:+	XPR1|9213	-0.620211	7.07e-05	0.0706216	hsa-mir-30e	ENSG00000143324	1	0	0	1	0	1	-0.205834
hg19:10:104196313-104196332:+	SORCS1|114815	-0.620168	7.08e-05	0.0706216	hsa-mir-146b	ENSG00000108018	0	0	1	0	0	1	-0.425503
hg19:17:1617207-1617229:-	SPPL3|121665	-0.620168	7.08e-05	0.0706216	hsa-mir-22	ENSG00000157837	1	0	0	0	1	0	-0.340358
hg19:12:7073318-7073336:+	APOL3|80833	-0.620168	7.08e-05	0.0706216	hsa-mir-141	ENSG00000128284	0	1	0	1	1	1	-0.316956
hg19:17:1617207-1617229:-	MAML3|55534	-0.620168	7.08e-05	0.0706216	hsa-mir-22	ENSG00000196782	0	0	1	0	0	1	-0.283081
hg19:17:11985226-11985247:+	GFOD2|81577	-0.620168	7.08e-05	0.0706216	hsa-mir-744	ENSG00000141098	0	1	0	1	0	0	-0.239845
hg19:17:1953223-1953245:-	ABHD12|26090	-0.620168	7.08e-05	0.0706216	hsa-mir-132	ENSG00000100997	1	0	1	0	0	1	-0.0646767
hg19:14:101506606-101506628:+	WHSC1|7468	-0.620121	7.09e-05	0.0707095	hsa-mir-654	ENSG00000109685	1	0	0	1	0	1	-0.0325338
hg19:5:148810263-148810285:+	FAM84B|157638	-0.620091	7.1e-05	0.0707642	hsa-mir-145	ENSG00000168672	1	0	0	1	0	0	-0.168548
hg19:10:105154060-105154079:-	DOCK3|1795	-0.620072	7.1e-05	0.070784	hsa-mir-1307	ENSG00000260587	0	0	1	0	0	1	0.00268228
hg19:19:13985578-13985599:+	SH2D4B|387694	-0.620062	7.1e-05	0.0707999	hsa-mir-181c	ENSG00000178217	1	0	0	1	0	0	-0.0674165
hg19:7:129414804-129414829:-	DNAJA2|10294	-0.620018	7.11e-05	0.0708864	hsa-mir-183	ENSG00000069345	0	1	0	0	1	0	-0.0600132
hg19:14:101506606-101506628:+	TAF1L|138474	-0.61998	7.12e-05	0.0709098	hsa-mir-654	ENSG00000122728	1	0	1	0	0	1	-0.0525948
hg19:X:49777864-49777888:+	SPCS2|9789	-0.619959	7.13e-05	0.0709098	hsa-mir-660	ENSG00000118363	1	0	0	1	0	0	0.066052
hg19:19:52196521-52196543:+	SERPINA3|12	-0.619931	7.13e-05	0.0709098	hsa-mir-125a	ENSG00000196136	1	1	0	0	1	1	-0.390248
hg19:1:110141562-110141582:+	NEURL4|84461	-0.619931	7.13e-05	0.0709098	hsa-mir-197	ENSG00000215041	1	0	1	0	0	1	-0.0445218
hg19:6:72086708-72086729:-	PTPN22|26191	-0.619888	7.15e-05	0.0709098	hsa-mir-30c-2	ENSG00000134242	1	0	0	0	0	1	-0.484361
hg19:10:104196276-104196299:+	AOX1|316	-0.619888	7.15e-05	0.0709098	hsa-mir-146b	ENSG00000138356	0	0	1	0	0	1	-0.471698
hg19:1:110141562-110141583:+	SALL2|6297	-0.619888	7.15e-05	0.0709098	hsa-mir-197	ENSG00000165821	0	0	1	1	1	1	-0.152905
hg19:5:136983270-136983292:-	MYC|4609	-0.619781	7.17e-05	0.0710853	hsa-mir-874	ENSG00000136997	0	1	0	0	0	1	-0.158817
hg19:14:102026663-102026684:-	ZNF215|7762	-0.619651	7.2e-05	0.0712065	hsa-mir-1247	ENSG00000149054	1	0	0	0	1	0	-0.218024
hg19:11:64658631-64658653:-	MN1|4330	-0.619651	7.2e-05	0.0712065	hsa-mir-192	ENSG00000169184	1	0	0	0	0	1	-0.167404
hg19:17:28444149-28444171:+	CXCL12|6387	-0.619608	7.22e-05	0.0712065	hsa-mir-423	ENSG00000107562	1	0	0	1	0	0	-0.385169
hg19:17:57918672-57918691:+	ZNF382|84911	-0.619608	7.22e-05	0.0712065	hsa-mir-21	ENSG00000161298	0	0	1	1	0	0	-0.320509
hg19:19:52196521-52196544:+	FBN1|2200	-0.619608	7.22e-05	0.0712065	hsa-mir-125a	ENSG00000166147	1	0	1	0	0	1	-0.310339
hg19:2:219866370-219866391:-	RAI14|26064	-0.619608	7.22e-05	0.0712065	hsa-mir-375	ENSG00000039560	0	1	0	0	0	1	-0.284266
hg19:9:116971767-116971787:+	NR2F1|7025	-0.619608	7.22e-05	0.0712065	hsa-mir-455	ENSG00000175745	1	0	0	1	0	0	-0.202026
hg19:1:209605511-209605533:+	SERTAD2|9792	-0.619608	7.22e-05	0.0712065	hsa-mir-205	ENSG00000179833	1	0	0	1	0	1	-0.119065
hg19:17:79099688-79099709:-	PHKB|5257	-0.619608	7.22e-05	0.0712065	hsa-mir-338	ENSG00000102893	1	0	1	1	0	1	-0.0924842
hg19:X:45606444-45606463:-	SSH2|85464	-0.619608	7.22e-05	0.0712065	hsa-mir-222	ENSG00000141298	1	0	1	1	0	1	-0.0907974
hg19:2:177015057-177015076:+	CUL5|8065	-0.619608	7.22e-05	0.0712065	hsa-mir-10b	ENSG00000166266	1	0	0	0	0	1	-0.0465137
hg19:14:100576054-100576075:+	PHYHIP|9796	-0.619606	7.22e-05	0.0712106	hsa-mir-342	ENSG00000168490	0	0	1	1	0	0	-0.0694387
hg19:7:25989581-25989603:-	BAIAP3|8938	-0.619594	7.22e-05	0.0712295	hsa-mir-148a	ENSG00000007516	1	0	1	0	1	1	-0.129805
hg19:1:110141503-110141523:+	PLEKHG4|25894	-0.619584	7.22e-05	0.0712503	hsa-mir-197	ENSG00000196155	1	1	1	0	1	0	-0.0684947
hg19:7:129414811-129414829:-	RIC8B|55188	-0.619555	7.23e-05	0.0713065	hsa-mir-183	ENSG00000111785	1	0	1	0	0	1	-0.122385
hg19:X:135633087-135633109:+	PLSCR4|57088	-0.619549	7.23e-05	0.0713186	hsa-mir-934	ENSG00000114698	1	0	0	1	0	0	-0.188361
hg19:17:1617209-1617230:-	LETMD1|25875	-0.619511	7.24e-05	0.0713676	hsa-mir-22	ENSG00000050426	1	0	0	0	1	1	-0.416804
hg19:X:151128150-151128170:-	CLIC2|1193	-0.619486	7.25e-05	0.0714083	hsa-mir-452	ENSG00000155962	1	0	0	1	0	0	-0.317569
hg19:5:148808540-148808557:+	ZFP14|57677	-0.619459	7.25e-05	0.0714591	hsa-mir-143	ENSG00000142065	0	0	1	1	0	0	0.030561
hg19:19:52196559-52196581:+	ZNF468|90333	-0.619405	7.27e-05	0.0715193	hsa-mir-125a	ENSG00000204604	0	0	1	0	1	1	-0.125797
hg19:10:105154058-105154079:-	ADAM11|4185	-0.619371	7.27e-05	0.0715193	hsa-mir-1307	ENSG00000073670	1	1	1	1	0	1	-0.184864
hg19:X:133680715-133680732:-	PRDM12|59335	-0.619366	7.28e-05	0.0715193	hsa-mir-424	ENSG00000130711	1	0	0	1	0	0	-0.226208
hg19:14:101520654-101520675:+	DCLRE1A|9937	-0.619365	7.28e-05	0.0715193	hsa-mir-382	ENSG00000198924	0	1	0	1	1	0	-0.189113
hg19:6:72086706-72086729:-	ISG20|3669	-0.619328	7.29e-05	0.0715193	hsa-mir-30c-2	ENSG00000172183	1	0	0	0	0	1	-0.434059
hg19:12:7073318-7073342:+	TFPI|7035	-0.619328	7.29e-05	0.0715193	hsa-mir-141	ENSG00000003436	1	0	0	0	1	1	-0.352558
hg19:17:1617207-1617230:-	ZNF140|7699	-0.619328	7.29e-05	0.0715193	hsa-mir-22	ENSG00000196387	1	0	1	0	1	0	-0.242855
hg19:19:50004089-50004111:-	DUOX1|53905	-0.619328	7.29e-05	0.0715193	hsa-mir-150	ENSG00000137857	1	0	1	0	1	1	-0.238781
hg19:17:57918615-57918634:+	NISCH|11188	-0.619328	7.29e-05	0.0715193	hsa-mir-21	ENSG00000010322	0	0	1	0	0	1	-0.234277
hg19:8:135812813-135812835:-	SLC7A7|9056	-0.619328	7.29e-05	0.0715193	hsa-mir-30b	ENSG00000155465	1	0	0	0	1	1	-0.21308
hg19:10:104196313-104196334:+	FAT2|2196	-0.619328	7.29e-05	0.0715193	hsa-mir-146b	ENSG00000086570	0	0	1	1	0	1	-0.15468
hg19:9:116971767-116971786:+	ZNF442|79973	-0.619328	7.29e-05	0.0715193	hsa-mir-455	ENSG00000198342	0	0	1	0	0	1	-0.115287
hg19:19:52196522-52196545:+	GLI3|2737	-0.619288	7.3e-05	0.0716013	hsa-mir-125a	ENSG00000106571	0	0	1	0	0	1	-0.00573492
hg19:13:92003327-92003349:+	HEMK1|51409	-0.619283	7.3e-05	0.0716111	hsa-mir-20a	ENSG00000114735	1	0	0	1	1	1	0.0261552
hg19:7:129410284-129410311:-	TRPC5|7224	-0.619231	7.31e-05	0.0716847	hsa-mir-182	ENSG00000072315	0	1	1	1	0	1	-0.332364
hg19:7:25989542-25989559:-	CLCN2|1181	-0.619186	7.32e-05	0.071775	hsa-mir-148a	ENSG00000114859	1	1	1	0	0	1	0.0465805
hg19:5:136983330-136983351:-	SNAPC4|6621	-0.619084	7.35e-05	0.0718043	hsa-mir-874	ENSG00000165684	0	0	1	0	0	1	-0.0763086
hg19:16:69967049-69967070:+	TPCN1|53373	-0.619049	7.36e-05	0.0718043	hsa-mir-140	ENSG00000186815	1	1	0	1	0	1	-0.0041652
hg19:6:30552109-30552131:+	MUSTN1|389125	-0.619049	7.36e-05	0.0718043	hsa-mir-877	ENSG00000243696	1	0	0	0	1	0	0.0979553
hg19:1:9211795-9211816:-	CDON|50937	-0.619048	7.36e-05	0.0718043	hsa-mir-34a	ENSG00000064309	0	0	1	0	0	1	-0.482257
hg19:9:131007063-131007085:-	ZNF571|51276	-0.619048	7.36e-05	0.0718043	hsa-mir-199b	ENSG00000180479	1	0	0	0	1	0	-0.453183
hg19:1:207975209-207975232:-	MSL3|10943	-0.619048	7.36e-05	0.0718043	hsa-mir-29c	ENSG00000005302	1	0	0	1	0	1	-0.32067
hg19:14:101340890-101340912:+	NIPAL3|57185	-0.619048	7.36e-05	0.0718043	hsa-mir-337	ENSG00000001461	1	0	0	0	0	1	-0.228759
hg19:5:159912379-159912400:+	NOSTRIN|115677	-0.619048	7.36e-05	0.0718043	hsa-mir-146a	ENSG00000262773	0	0	1	0	1	1	-0.212006
hg19:9:97847745-97847766:+	ITGAL|3683	-0.619048	7.36e-05	0.0718043	hsa-mir-27b	ENSG00000005844	1	0	0	1	0	1	-0.210593
hg19:3:188406623-188406645:+	MYT1|4661	-0.619048	7.36e-05	0.0718043	hsa-mir-28	ENSG00000196132	0	0	1	0	0	1	-0.0569011
hg19:2:177015057-177015076:+	PNPLA8|50640	-0.619048	7.36e-05	0.0718043	hsa-mir-10b	ENSG00000135241	1	0	0	0	0	1	-0.000897211
hg19:2:219267380-219267402:+	CD6|923	-0.619048	7.36e-05	0.0718043	hsa-mir-26b	ENSG00000013725	0	0	1	1	1	1	0.0436552
hg19:X:133674261-133674283:-	CAP1|10487	-0.618951	7.38e-05	0.0719674	hsa-mir-450b	ENSG00000131236	0	1	0	0	0	1	-0.264343
hg19:7:99691198-99691216:-	PPFIBP2|8495	-0.618899	7.39e-05	0.0720779	hsa-mir-25	ENSG00000166387	0	1	0	0	0	1	-0.0778694
hg19:14:101340891-101340912:+	TSEN2|80746	-0.618854	7.41e-05	0.0721124	hsa-mir-337	ENSG00000154743	1	1	1	0	0	1	-0.401669
hg19:6:72086710-72086729:-	KLHL2|11275	-0.618768	7.43e-05	0.0721124	hsa-mir-30c-2	ENSG00000109466	1	0	1	0	1	1	-0.382563
hg19:X:45605610-45605630:-	SNX11|29916	-0.618768	7.43e-05	0.0721124	hsa-mir-221	ENSG00000002919	1	0	1	1	0	0	-0.374148
hg19:1:207975797-207975819:-	HNRNPF|3185	-0.618768	7.43e-05	0.0721124	hsa-mir-29b-2	ENSG00000169813	0	1	0	0	1	0	-0.281741
hg19:1:155165028-155165047:+	KLHL3|26249	-0.618768	7.43e-05	0.0721124	hsa-mir-92b	ENSG00000146021	0	0	1	1	0	0	-0.25965
hg19:X:85158685-85158708:-	VASH1|22846	-0.618768	7.43e-05	0.0721124	hsa-mir-361	ENSG00000071246	1	0	1	1	0	1	-0.252912
hg19:12:54731062-54731082:+	CALM1|801	-0.618768	7.43e-05	0.0721124	hsa-mir-148b	ENSG00000198668	1	0	0	1	0	1	-0.0944568
hg19:1:209605511-209605533:+	GABRB2|2561	-0.618768	7.43e-05	0.0721124	hsa-mir-205	ENSG00000145864	1	0	0	1	0	0	0.0104836
hg19:2:207974767-207974788:-	INTS8|55656	-0.618768	7.43e-05	0.0721124	hsa-mir-2355	ENSG00000164941	1	1	1	0	0	1	0.0294663
hg19:17:28444113-28444132:+	PCDHGA12|26025	-0.618661	7.46e-05	0.0723014	hsa-mir-423	ENSG00000253159	0	0	1	0	0	1	-0.0299327
hg19:X:73438284-73438303:-	OBSCN|84033	-0.618572	7.48e-05	0.0724132	hsa-mir-421	ENSG00000154358	0	1	1	0	0	1	0.0465932
hg19:5:148808539-148808562:+	KIAA0195|9772	-0.618546	7.48e-05	0.0724132	hsa-mir-143	ENSG00000177728	0	0	1	0	1	1	0.136203
hg19:10:105154058-105154079:-	BTBD11|121551	-0.618531	7.49e-05	0.0724132	hsa-mir-1307	ENSG00000151136	0	1	1	0	1	0	-0.194783
hg19:11:64658631-64658653:-	PCOLCE2|26577	-0.618531	7.49e-05	0.0724132	hsa-mir-192	ENSG00000163710	0	1	1	0	0	1	-0.150518
hg19:X:45605653-45605671:-	COPB1|1315	-0.618508	7.49e-05	0.0724132	hsa-mir-221	ENSG00000129083	0	0	1	0	0	1	-0.0430643
hg19:5:136983270-136983293:-	PODNL1|79883	-0.618487	7.5e-05	0.0724132	hsa-mir-874	ENSG00000132000	0	0	1	0	0	1	-0.375936
hg19:19:50004090-50004113:-	RCCD1|91433	-0.618487	7.5e-05	0.0724132	hsa-mir-150	ENSG00000166965	1	0	0	0	1	0	-0.369413
hg19:10:105154056-105154079:-	STARD8|9754	-0.618487	7.5e-05	0.0724132	hsa-mir-1307	ENSG00000130052	1	0	1	0	1	0	-0.15241
hg19:X:73507161-73507182:-	SNX33|257364	-0.618487	7.5e-05	0.0724132	hsa-mir-374a	ENSG00000173548	1	0	0	1	0	0	-0.0684237
hg19:X:133680713-133680732:-	TBC1D8|11138	-0.618381	7.53e-05	0.0725955	hsa-mir-424	ENSG00000204634	0	0	1	0	0	1	-0.135095
hg19:7:129410287-129410307:-	PAK6|56924	-0.618377	7.53e-05	0.0726006	hsa-mir-182	ENSG00000137843	0	1	0	0	1	1	0.112586
hg19:2:177015060-177015080:+	ABCG5|64240	-0.618354	7.53e-05	0.0726445	hsa-mir-10b	ENSG00000138075	1	0	1	0	1	1	-0.303404
hg19:10:104196313-104196330:+	DST|667	-0.618325	7.54e-05	0.0727045	hsa-mir-146b	ENSG00000151914	1	0	1	1	0	1	-0.0558721
hg19:7:99691438-99691461:-	C9orf9|11092	-0.618294	7.55e-05	0.0727237	hsa-mir-93	ENSG00000165698	0	1	0	1	0	1	-0.220603
hg19:8:10892731-10892753:-	OLFML2B|25903	-0.618207	7.57e-05	0.0727237	hsa-mir-598	ENSG00000162745	0	1	0	0	0	1	-0.491341
hg19:X:133675397-133675417:-	LCP1|3936	-0.618207	7.57e-05	0.0727237	hsa-mir-542	ENSG00000136167	1	0	0	0	0	1	-0.420238
hg19:7:129414805-129414829:-	ADAMTS9|56999	-0.618207	7.57e-05	0.0727237	hsa-mir-183	ENSG00000163638	1	0	0	1	0	0	-0.371631
hg19:17:28444113-28444136:+	TMEM176A|55365	-0.618207	7.57e-05	0.0727237	hsa-mir-423	ENSG00000002933	0	1	0	0	1	0	-0.261425
hg19:X:85158648-85158669:-	PPFIBP2|8495	-0.618207	7.57e-05	0.0727237	hsa-mir-361	ENSG00000166387	0	1	0	0	1	0	-0.240905
hg19:11:122022984-122023005:-	PPFIA1|8500	-0.618207	7.57e-05	0.0727237	hsa-mir-100	ENSG00000131626	0	0	1	0	0	1	-0.226942
hg19:7:129410293-129410311:-	PTPRA|5786	-0.618207	7.57e-05	0.0727237	hsa-mir-182	ENSG00000132670	0	0	1	0	1	1	-0.154638
hg19:9:97847744-97847766:+	ERBB3|2065	-0.618179	7.58e-05	0.0727719	hsa-mir-27b	ENSG00000065361	0	1	1	1	0	1	-0.0780172
hg19:7:25989546-25989564:-	AGAP1|116987	-0.618177	7.58e-05	0.0727767	hsa-mir-148a	ENSG00000157985	0	1	0	0	0	1	-0.215561
hg19:12:54731062-54731081:+	FAM110C|642273	-0.617999	7.63e-05	0.0730214	hsa-mir-148b	ENSG00000184731	1	0	0	1	0	0	-0.0777986
hg19:3:183959193-183959217:+	ELMO1|9844	-0.61796	7.64e-05	0.0730214	hsa-mir-1224	ENSG00000155849	1	0	0	1	0	1	0.099834
hg19:7:129410287-129410307:-	TMCO4|255104	-0.617955	7.64e-05	0.0730214	hsa-mir-182	ENSG00000162542	1	0	0	0	1	1	0.15638
hg19:17:57918671-57918693:+	PLN|5350	-0.617953	7.64e-05	0.0730214	hsa-mir-21	ENSG00000198523	1	0	0	1	0	0	-0.0875208
hg19:22:31127597-31127618:+	TARS|6897	-0.617936	7.64e-05	0.0730214	hsa-mir-3200	ENSG00000113407	0	1	0	1	0	0	-0.0800519
hg19:17:57918634-57918654:+	METTL7A|25840	-0.617927	7.65e-05	0.0730214	hsa-mir-21	ENSG00000185432	0	1	0	1	0	0	-0.570273
hg19:16:67236231-67236252:-	ADAM19|8728	-0.617927	7.65e-05	0.0730214	hsa-mir-328	ENSG00000135074	0	1	1	0	1	1	-0.499405
hg19:6:72086707-72086729:-	TRAF3IP3|80342	-0.617927	7.65e-05	0.0730214	hsa-mir-30c-2	ENSG00000009790	0	0	1	0	0	1	-0.432647
hg19:17:11985226-11985247:+	IGF1|3479	-0.617927	7.65e-05	0.0730214	hsa-mir-744	ENSG00000017427	1	0	0	1	0	0	-0.36711
hg19:X:133680673-133680695:-	NEK6|10783	-0.617927	7.65e-05	0.0730214	hsa-mir-424	ENSG00000119408	1	0	0	1	0	0	-0.347066
hg19:7:129410285-129410311:-	PLXNC1|10154	-0.617927	7.65e-05	0.0730214	hsa-mir-182	ENSG00000136040	1	0	0	0	0	1	-0.268371
hg19:7:25989543-25989564:-	CCDC17|149483	-0.617927	7.65e-05	0.0730214	hsa-mir-148a	ENSG00000159588	1	0	1	0	0	1	-0.217733
hg19:7:99691441-99691461:-	PGPEP1|54858	-0.617927	7.65e-05	0.0730214	hsa-mir-93	ENSG00000130517	1	0	0	1	0	0	-0.166021
hg19:16:69967049-69967071:+	SLC34A2|10568	-0.617912	7.65e-05	0.0730502	hsa-mir-140	ENSG00000157765	0	0	1	0	0	1	-0.151334
hg19:17:79099686-79099709:-	SVIL|6840	-0.61783	7.67e-05	0.0731939	hsa-mir-338	ENSG00000197321	0	0	1	0	0	1	-0.419348
hg19:10:100154991-100155011:-	GNPDA1|10007	-0.617812	7.68e-05	0.0732289	hsa-mir-1287	ENSG00000113552	1	0	1	1	0	1	-0.0834884
hg19:7:129414812-129414831:-	DOCK3|1795	-0.6178	7.68e-05	0.0732493	hsa-mir-183	ENSG00000260587	0	0	1	0	0	1	0.0218771
hg19:10:104196278-104196301:+	ST3GAL4|6484	-0.617734	7.7e-05	0.0733356	hsa-mir-146b	ENSG00000110080	0	1	1	1	0	0	-0.0983975
hg19:19:13985578-13985600:+	NEK6|10783	-0.61769	7.71e-05	0.0733356	hsa-mir-181c	ENSG00000119408	1	0	0	1	0	0	-0.412931
hg19:9:73424947-73424969:-	EPHA10|284656	-0.617647	7.72e-05	0.0733356	hsa-mir-204	ENSG00000183317	1	1	1	0	0	1	-0.521063
hg19:1:9211795-9211816:-	MPPED2|744	-0.617647	7.72e-05	0.0733356	hsa-mir-34a	ENSG00000066382	1	0	0	1	0	0	-0.476482
hg19:5:136983270-136983293:-	TAGLN2|8407	-0.617647	7.72e-05	0.0733356	hsa-mir-874	ENSG00000158710	1	0	0	0	0	1	-0.395132
hg19:14:101349338-101349360:+	SUPT3H|8464	-0.617647	7.72e-05	0.0733356	hsa-mir-127	ENSG00000196284	0	1	1	0	0	1	-0.315571
hg19:17:46657268-46657288:-	LCORL|254251	-0.617647	7.72e-05	0.0733356	hsa-mir-10a	ENSG00000178177	1	0	1	1	0	1	-0.146024
hg19:2:207974767-207974788:-	BAZ2B|29994	-0.617647	7.72e-05	0.0733356	hsa-mir-2355	ENSG00000123636	0	0	1	1	1	1	0.0331186
hg19:14:65937834-65937854:+	STARD10|10809	-0.617645	7.72e-05	0.0733378	hsa-mir-625	ENSG00000214530	0	1	0	1	0	1	-0.0671043
hg19:3:160122433-160122452:+	DDB1|1642	-0.617594	7.73e-05	0.0734386	hsa-mir-15b	ENSG00000167986	0	1	0	1	1	1	-0.0690196
hg19:14:101506606-101506628:+	KIAA1731|85459	-0.617592	7.73e-05	0.0734401	hsa-mir-654	ENSG00000166004	0	1	1	0	1	1	-0.0304406
hg19:5:85916365-85916383:+	CPEB1|64506	-0.617567	7.74e-05	0.0734972	hsa-mir-3607	ENSG00000214575	0	1	0	0	1	1	0.0197366
hg19:19:52196522-52196545:+	PTPN12|5782	-0.617462	7.77e-05	0.073632	hsa-mir-125a	ENSG00000127947	0	1	0	1	0	1	-0.00577894
hg19:19:52196521-52196542:+	GSTM5|2949	-0.61741	7.78e-05	0.073632	hsa-mir-125a	ENSG00000134201	0	1	0	1	1	0	-0.25977
hg19:7:129410286-129410311:-	ZNRF3|84133	-0.61741	7.78e-05	0.073632	hsa-mir-182	ENSG00000183579	1	0	1	1	0	0	-0.205261
hg19:X:49767774-49767796:+	SCN2B|6327	-0.617382	7.79e-05	0.073632	hsa-mir-532	ENSG00000149575	1	0	1	1	0	0	-0.0582969
hg19:6:72086706-72086729:-	CDH6|1004	-0.617367	7.79e-05	0.073632	hsa-mir-30c-2	ENSG00000113361	1	1	1	1	0	0	-0.575296
hg19:17:11985226-11985247:+	CMKLR1|1240	-0.617367	7.79e-05	0.073632	hsa-mir-744	ENSG00000174600	1	0	0	0	1	0	-0.483073
hg19:1:9211795-9211816:-	C7orf41|222166	-0.617367	7.79e-05	0.073632	hsa-mir-34a	ENSG00000180354	1	0	0	1	0	1	-0.42804
hg19:1:110141562-110141583:+	PLXNA4|91584	-0.617367	7.79e-05	0.073632	hsa-mir-197	ENSG00000221866	1	0	0	1	1	1	-0.232662
hg19:1:110141562-110141583:+	GPRASP1|9737	-0.617367	7.79e-05	0.073632	hsa-mir-197	ENSG00000198932	0	1	0	0	0	1	-0.113746
hg19:7:25989543-25989565:-	CACNB2|783	-0.617346	7.8e-05	0.0736727	hsa-mir-148a	ENSG00000165995	1	1	1	1	1	0	0.0970457
hg19:2:207974721-207974743:-	PSME4|23198	-0.617305	7.81e-05	0.0737506	hsa-mir-2355	ENSG00000068878	1	0	1	0	0	1	0.0924856
hg19:9:97847787-97847808:+	CSF2RA|1438	-0.61727	7.82e-05	0.0738036	hsa-mir-27b	ENSG00000198223	1	0	0	1	0	1	-0.182087
hg19:14:101350833-101350852:+	CEP72|55722	-0.617198	7.84e-05	0.0739266	hsa-mir-432	ENSG00000112877	0	0	1	1	0	0	-0.135888
hg19:16:2321807-2321827:+	RAI1|10743	-0.617178	7.85e-05	0.0739266	hsa-mir-940	ENSG00000108557	1	1	0	0	1	1	-0.128097
hg19:7:129410289-129410311:-	GPRASP1|9737	-0.61713	7.86e-05	0.0739266	hsa-mir-182	ENSG00000198932	0	1	0	0	0	1	-0.156309
hg19:7:129410285-129410306:-	TBX2|6909	-0.617094	7.87e-05	0.0739266	hsa-mir-182	ENSG00000121068	1	0	1	0	0	1	-0.0580241
hg19:21:26946295-26946315:+	ZNF596|169270	-0.617087	7.87e-05	0.0739266	hsa-mir-155	ENSG00000172748	1	0	0	0	0	1	-0.541428
hg19:21:17911420-17911442:+	FLVCR2|55640	-0.617087	7.87e-05	0.0739266	hsa-mir-99a	ENSG00000119686	1	0	1	0	1	1	-0.388491
hg19:1:9211793-9211815:-	CLMN|79789	-0.617087	7.87e-05	0.0739266	hsa-mir-34a	ENSG00000165959	1	0	0	1	1	0	-0.3831
hg19:19:50004090-50004111:-	KIAA1107|23285	-0.617087	7.87e-05	0.0739266	hsa-mir-150	ENSG00000069712	0	0	1	0	0	1	-0.326715
hg19:1:110141562-110141583:+	IQCA1|79781	-0.617087	7.87e-05	0.0739266	hsa-mir-197	ENSG00000132321	1	0	0	0	0	1	-0.313354
hg19:11:57408725-57408747:+	SH2D2A|9047	-0.617087	7.87e-05	0.0739266	hsa-mir-130a	ENSG00000027869	0	0	1	0	0	1	-0.282556
hg19:17:1617208-1617229:-	CIRH1A|84916	-0.617087	7.87e-05	0.0739266	hsa-mir-22	ENSG00000141076	1	0	0	0	0	1	-0.281684
hg19:16:67236230-67236252:-	RASL11B|65997	-0.617087	7.87e-05	0.0739266	hsa-mir-328	ENSG00000128045	1	0	0	1	0	0	-0.275204
hg19:1:41220086-41220107:+	PLEKHO1|51177	-0.617087	7.87e-05	0.0739266	hsa-mir-30e	ENSG00000023902	0	0	1	0	1	0	-0.208102
hg19:10:105154057-105154079:-	HYDIN|54768	-0.617087	7.87e-05	0.0739266	hsa-mir-1307	ENSG00000157423	1	0	1	0	0	1	-0.0414762
hg19:9:127454796-127454817:+	SHC1|6464	-0.617087	7.87e-05	0.0739266	hsa-mir-181a-2	ENSG00000160691	0	0	1	1	0	0	-0.0358585
hg19:9:131007023-131007045:-	PARD6B|84612	-0.616969	7.9e-05	0.0741316	hsa-mir-199b	ENSG00000124171	0	0	1	0	0	1	-0.159163
hg19:X:118780728-118780748:-	ETNK2|55224	-0.616965	7.9e-05	0.0741411	hsa-mir-766	ENSG00000143845	0	1	0	0	1	1	-0.102609
hg19:14:101488408-101488430:+	UNC50|25972	-0.616936	7.91e-05	0.0742035	hsa-mir-379	ENSG00000115446	0	1	0	0	1	0	-0.195139
hg19:19:50004089-50004113:-	APOL5|80831	-0.616927	7.91e-05	0.0742239	hsa-mir-150	ENSG00000128313	0	0	1	0	0	1	-0.0800113
hg19:1:110141563-110141584:+	SPAG7|9552	-0.616899	7.92e-05	0.0742239	hsa-mir-197	ENSG00000091640	1	0	1	0	0	1	0.0349094
hg19:10:104196280-104196300:+	SNAP91|9892	-0.616893	7.92e-05	0.0742239	hsa-mir-146b	ENSG00000065609	0	1	0	0	0	1	-0.347627
hg19:14:101521801-101521823:+	FIP1L1|81608	-0.616829	7.94e-05	0.0742239	hsa-mir-485	ENSG00000145216	1	0	1	1	0	1	-0.14474
hg19:6:72086707-72086729:-	NOD2|64127	-0.616807	7.95e-05	0.0742239	hsa-mir-30c-2	ENSG00000167207	1	0	0	0	0	1	-0.538669
hg19:17:57918615-57918634:+	HHEX|3087	-0.616807	7.95e-05	0.0742239	hsa-mir-21	ENSG00000152804	0	0	1	1	0	0	-0.353901
hg19:7:99691195-99691216:-	VAMP1|6843	-0.616807	7.95e-05	0.0742239	hsa-mir-25	ENSG00000139190	0	1	0	0	1	0	-0.235985
hg19:13:50623305-50623325:-	SETX|23064	-0.616807	7.95e-05	0.0742239	hsa-mir-15a	ENSG00000107290	0	0	1	0	1	1	-0.108806
hg19:1:205417489-205417512:-	SRPX|8406	-0.616807	7.95e-05	0.0742239	hsa-mir-135b	ENSG00000101955	0	0	1	0	0	1	-0.0858076
hg19:7:99691438-99691458:-	THADA|63892	-0.616807	7.95e-05	0.0742239	hsa-mir-93	ENSG00000115970	1	0	0	0	1	1	0.0945969
hg19:14:101351088-101351109:+	SYTL5|94122	-0.616796	7.95e-05	0.0742409	hsa-mir-136	ENSG00000147041	0	1	0	1	0	1	0.0565526
hg19:19:46142269-46142289:-	MMS19|64210	-0.616742	7.96e-05	0.0743517	hsa-mir-330	ENSG00000155229	1	1	1	1	1	1	-0.110726
hg19:7:129410289-129410308:-	SLC12A1|6557	-0.616695	7.98e-05	0.0744262	hsa-mir-182	ENSG00000074803	0	0	1	0	0	1	-0.138472
hg19:6:72086708-72086729:-	ITGAL|3683	-0.616527	8.02e-05	0.0745621	hsa-mir-30c-2	ENSG00000005844	1	0	0	1	0	1	-0.344058
hg19:17:6920985-6921007:-	CLEC16A|23274	-0.616527	8.02e-05	0.0745621	hsa-mir-195	ENSG00000038532	1	1	1	1	0	0	-0.264608
hg19:17:46657270-46657289:-	PTPN3|5774	-0.616527	8.02e-05	0.0745621	hsa-mir-10a	ENSG00000070159	1	1	0	0	1	1	-0.21559
hg19:10:105154058-105154080:-	TUBG2|27175	-0.616527	8.02e-05	0.0745621	hsa-mir-1307	ENSG00000037042	0	0	1	0	0	1	-0.204402
hg19:19:46522219-46522240:+	SLC23A3|151295	-0.616527	8.02e-05	0.0745621	hsa-mir-769	ENSG00000213901	1	0	0	1	0	1	-0.00123444
hg19:5:148808539-148808560:+	MCM2|4171	-0.616517	8.02e-05	0.0745751	hsa-mir-143	ENSG00000073111	1	0	1	0	0	1	-0.190374
hg19:17:57215147-57215171:-	TMPRSS6|164656	-0.616502	8.03e-05	0.0746094	hsa-mir-454	ENSG00000187045	0	0	1	0	0	1	-0.101545
hg19:7:129410290-129410306:-	SLIT1|6585	-0.616412	8.05e-05	0.0747557	hsa-mir-182	ENSG00000187122	0	0	1	0	0	1	-0.0250016
hg19:14:101514286-101514306:+	SOX6|55553	-0.616398	8.06e-05	0.0747779	hsa-mir-889	ENSG00000110693	1	0	0	1	0	0	-0.149418
hg19:7:130135971-130135989:+	ABCG5|64240	-0.616356	8.07e-05	0.0748463	hsa-mir-335	ENSG00000138075	0	1	1	0	0	1	-0.138791
hg19:19:46178201-46178223:+	CCKBR|887	-0.616355	8.07e-05	0.0748463	hsa-mir-642a	ENSG00000110148	1	0	0	0	0	1	-0.270543
hg19:9:97847744-97847766:+	SRCIN1|80725	-0.61634	8.07e-05	0.0748463	hsa-mir-27b	ENSG00000017373	0	0	1	1	0	1	0.0746617
hg19:14:65937834-65937854:+	C19orf47|126526	-0.616338	8.07e-05	0.0748463	hsa-mir-625	ENSG00000160392	1	0	1	1	0	0	-0.101763
hg19:X:45606478-45606500:-	PHKB|5257	-0.616322	8.08e-05	0.0748463	hsa-mir-222	ENSG00000102893	1	0	1	1	0	0	-0.373629
hg19:9:96938637-96938659:+	ITIH3|3699	-0.616263	8.1e-05	0.0748463	hsa-let-7f-1	ENSG00000162267	0	0	1	0	0	1	0.0557812
hg19:5:148808543-148808563:+	ALK|238	-0.616251	8.1e-05	0.0748463	hsa-mir-143	ENSG00000171094	1	0	1	0	0	1	-0.099645
hg19:11:57408725-57408745:+	RASSF5|83593	-0.616247	8.1e-05	0.0748463	hsa-mir-130a	ENSG00000266094	0	0	1	0	0	1	-0.313477
hg19:8:135817163-135817184:-	GPN1|11321	-0.616247	8.1e-05	0.0748463	hsa-mir-30d	ENSG00000198522	1	0	1	0	0	1	-0.302425
hg19:X:45606442-45606463:-	PRICKLE2|166336	-0.616247	8.1e-05	0.0748463	hsa-mir-222	ENSG00000163637	1	0	0	1	0	0	-0.2895
hg19:1:207975248-207975269:-	CCL4|6351	-0.616247	8.1e-05	0.0748463	hsa-mir-29c	ENSG00000129277	1	0	0	0	1	0	-0.263116
hg19:10:105154056-105154080:-	EBF3|253738	-0.616247	8.1e-05	0.0748463	hsa-mir-1307	ENSG00000108001	0	1	0	0	0	1	-0.254115
hg19:17:56408647-56408667:-	LRP5|4041	-0.616247	8.1e-05	0.0748463	hsa-mir-142	ENSG00000162337	1	0	1	0	0	1	-0.220846
hg19:14:101521031-101521052:+	GLCCI1|113263	-0.616247	8.1e-05	0.0748463	hsa-mir-134	ENSG00000106415	0	0	1	0	0	1	-0.15559
hg19:22:20020711-20020731:+	GSTM3|2947	-0.616247	8.1e-05	0.0748463	hsa-mir-185	ENSG00000134202	1	0	0	1	0	0	-0.072564
hg19:1:209605511-209605533:+	PARP14|54625	-0.616247	8.1e-05	0.0748463	hsa-mir-205	ENSG00000173193	1	0	1	0	0	1	0.177799
hg19:13:92002909-92002929:+	MCF2L2|23101	-0.616239	8.1e-05	0.0748637	hsa-mir-17	ENSG00000053524	0	0	1	1	0	1	0.0540553
hg19:15:55665190-55665210:-	ISLR2|57611	-0.616206	8.11e-05	0.0749351	hsa-mir-628	ENSG00000167178	0	1	0	0	0	1	-0.148005
hg19:X:146341214-146341236:-	ZNF862|643641	-0.616119	8.14e-05	0.0750744	hsa-mir-509-3	ENSG00000106479	0	0	1	1	0	1	-0.22915
hg19:1:110141562-110141586:+	GPC3|2719	-0.616103	8.14e-05	0.0751091	hsa-mir-197	ENSG00000147257	0	1	0	0	0	1	0.0140246
hg19:7:129410288-129410304:-	FAM109A|144717	-0.61606	8.15e-05	0.0751675	hsa-mir-182	ENSG00000198324	1	0	0	1	0	0	-0.0998956
hg19:X:133675397-133675416:-	MTHFD1L|25902	-0.61601	8.17e-05	0.0751675	hsa-mir-542	ENSG00000120254	1	0	1	0	0	1	-0.154482
hg19:16:69967045-69967065:+	IMMP2L|83943	-0.615966	8.18e-05	0.0751675	hsa-mir-140	ENSG00000184903	1	1	0	0	1	1	-0.375426
hg19:9:97847745-97847767:+	RAP2B|5912	-0.615966	8.18e-05	0.0751675	hsa-mir-27b	ENSG00000181467	1	0	0	1	0	0	-0.244066
hg19:11:57408725-57408748:+	CD101|9398	-0.615966	8.18e-05	0.0751675	hsa-mir-130a	ENSG00000134256	1	0	0	0	0	1	-0.194328
hg19:17:1617208-1617227:-	ORMDL3|94103	-0.615966	8.18e-05	0.0751675	hsa-mir-22	ENSG00000172057	0	0	1	1	0	0	-0.12522
hg19:9:96941123-96941146:+	ARHGEF1|9138	-0.615966	8.18e-05	0.0751675	hsa-let-7d	ENSG00000076928	1	0	1	0	0	1	-0.0252988
hg19:1:209605511-209605533:+	NRCAM|4897	-0.615966	8.18e-05	0.0751675	hsa-mir-205	ENSG00000091129	1	0	1	1	0	1	-0.020053
hg19:2:207974721-207974743:-	USP15|9958	-0.615928	8.19e-05	0.0752434	hsa-mir-2355	ENSG00000135655	1	0	0	0	1	1	-0.0678909
hg19:20:57392683-57392703:-	CCDC27|148870	-0.615918	8.19e-05	0.0752638	hsa-mir-296	ENSG00000162592	1	0	1	1	0	0	-0.0533066
hg19:10:104196276-104196297:+	CAMKK2|10645	-0.615891	8.2e-05	0.0753104	hsa-mir-146b	ENSG00000110931	0	0	1	0	0	1	-0.285475
hg19:1:207975795-207975812:-	MED12|9968	-0.615779	8.23e-05	0.0754866	hsa-mir-29b-2	ENSG00000184634	0	0	1	0	0	1	-0.0472451
hg19:19:13985540-13985561:+	C19orf59|199675	-0.615719	8.25e-05	0.0754866	hsa-mir-181c	ENSG00000183019	0	0	1	1	0	0	-0.140134
hg19:10:104196277-104196301:+	SORBS2|8470	-0.615686	8.26e-05	0.0754866	hsa-mir-146b	ENSG00000154556	0	1	0	0	1	1	-0.650942
hg19:9:97847787-97847809:+	AURKA|6790	-0.615686	8.26e-05	0.0754866	hsa-mir-27b	ENSG00000087586	1	0	1	0	0	1	-0.373531
hg19:19:13985539-13985561:+	FAT2|2196	-0.615686	8.26e-05	0.0754866	hsa-mir-181c	ENSG00000086570	0	0	1	0	0	1	-0.341534
hg19:9:97847547-97847569:+	DCBLD2|131566	-0.615686	8.26e-05	0.0754866	hsa-mir-23b	ENSG00000057019	1	0	0	1	1	1	-0.306116
hg19:10:104196277-104196301:+	RYR3|6263	-0.615686	8.26e-05	0.0754866	hsa-mir-146b	ENSG00000198838	0	0	1	0	0	1	-0.0754694
hg19:5:136983271-136983292:-	DTX1|1840	-0.615686	8.26e-05	0.0754866	hsa-mir-874	ENSG00000135144	0	0	1	0	1	0	-0.0253678
hg19:5:148441939-148441958:-	ZSCAN20|7579	-0.615677	8.26e-05	0.0755056	hsa-mir-584	ENSG00000121903	1	0	0	0	0	1	0.0627817
hg19:19:46522219-46522239:+	PLAG1|5324	-0.615658	8.26e-05	0.0755423	hsa-mir-769	ENSG00000181690	1	0	1	0	0	1	-0.121102
hg19:9:20716153-20716175:+	CASK|8573	-0.615613	8.28e-05	0.0756359	hsa-mir-491	ENSG00000147044	1	0	1	1	1	1	-0.0919848
hg19:14:101351087-101351109:+	PIBF1|10464	-0.615568	8.29e-05	0.0756969	hsa-mir-136	ENSG00000083535	1	0	0	0	0	1	-0.236675
hg19:5:148810224-148810249:+	ZDHHC22|283576	-0.615557	8.29e-05	0.0757161	hsa-mir-145	ENSG00000177108	1	0	0	0	1	0	-0.242344
hg19:3:168269702-168269721:+	NUP93|9688	-0.615547	8.3e-05	0.0757375	hsa-mir-551b	ENSG00000102900	0	0	1	1	0	1	-0.186388
hg19:11:57408663-57408685:+	ISY1|57461	-0.615498	8.31e-05	0.0757847	hsa-mir-130a	ENSG00000240682	1	0	0	1	0	0	0.00134865
hg19:1:9211797-9211816:-	RASA3|22821	-0.615482	8.31e-05	0.0757847	hsa-mir-34a	ENSG00000185989	1	0	1	1	0	0	-0.105698
hg19:3:49057634-49057655:-	LGALS4|3960	-0.615449	8.32e-05	0.0757847	hsa-mir-425	ENSG00000171747	1	0	1	0	0	1	-0.164592
hg19:10:105154058-105154079:-	AGBL4|84871	-0.615449	8.32e-05	0.0757847	hsa-mir-1307	ENSG00000186094	0	1	1	0	0	1	-0.119874
hg19:9:131007025-131007046:-	ZNF660|285349	-0.615406	8.34e-05	0.0757847	hsa-mir-199b	ENSG00000144792	1	1	0	1	1	1	-0.355927
hg19:17:57918672-57918692:+	MSL2|55167	-0.615406	8.34e-05	0.0757847	hsa-mir-21	ENSG00000174579	1	0	0	0	1	0	-0.292914
hg19:4:38869713-38869733:+	ENPEP|2028	-0.615406	8.34e-05	0.0757847	hsa-mir-574	ENSG00000138792	1	0	1	0	0	1	-0.198989
hg19:14:100576054-100576077:+	GRID1|2894	-0.615406	8.34e-05	0.0757847	hsa-mir-342	ENSG00000182771	0	0	1	1	1	1	-0.195492
hg19:2:219866369-219866392:-	SERPINA3|12	-0.615406	8.34e-05	0.0757847	hsa-mir-375	ENSG00000196136	1	0	1	0	1	0	-0.124331
hg19:19:52196504-52196521:+	RASGRP3|25780	-0.615406	8.34e-05	0.0757847	hsa-mir-125a	ENSG00000152689	0	0	1	0	1	0	-0.0821723
hg19:13:50623305-50623325:-	HDLBP|3069	-0.615406	8.34e-05	0.0757847	hsa-mir-15a	ENSG00000115677	0	1	0	0	1	0	-0.0594279
hg19:1:110141562-110141583:+	PLEKHG4B|153478	-0.615406	8.34e-05	0.0757847	hsa-mir-197	ENSG00000153404	1	0	1	1	0	0	-0.0261432
hg19:6:72086667-72086688:-	C3|718	-0.615396	8.34e-05	0.0758038	hsa-mir-30c-2	ENSG00000125730	0	0	1	0	1	1	-0.481263
hg19:9:116971767-116971784:+	SGK3|23678	-0.615323	8.36e-05	0.0759568	hsa-mir-455	ENSG00000104205	1	0	0	1	0	0	-0.0807148
hg19:X:151127056-151127078:-	PCDH11X|27328	-0.615244	8.38e-05	0.076098	hsa-mir-224	ENSG00000102290	1	0	1	0	0	1	-0.0043025
hg19:9:127454798-127454817:+	ARHGEF17|9828	-0.615224	8.39e-05	0.0761075	hsa-mir-181a-2	ENSG00000110237	1	0	0	0	0	1	-0.0752617
hg19:5:148810225-148810247:+	NPC1|4864	-0.615191	8.4e-05	0.0761075	hsa-mir-145	ENSG00000141458	0	0	1	0	0	1	-0.265227
hg19:17:57918638-57918656:+	PTPRQ|374462	-0.615158	8.41e-05	0.0761075	hsa-mir-21	ENSG00000139304	0	0	1	0	0	1	-0.295905
hg19:1:207975211-207975232:-	HRH4|59340	-0.615148	8.41e-05	0.0761075	hsa-mir-29c	ENSG00000134489	1	0	1	0	0	1	0.00967441
hg19:5:148810224-148810248:+	ENDOD1|23052	-0.615126	8.42e-05	0.0761075	hsa-mir-145	ENSG00000149218	1	0	1	1	0	0	-0.317013
hg19:7:130135967-130135989:+	ERI1|90459	-0.615126	8.42e-05	0.0761075	hsa-mir-335	ENSG00000104626	1	0	1	1	0	1	-0.29707
hg19:17:29887035-29887057:+	CPNE2|221184	-0.615126	8.42e-05	0.0761075	hsa-mir-193a	ENSG00000140848	0	1	1	0	0	1	-0.175665
hg19:5:168195216-168195237:-	CPOX|1371	-0.615126	8.42e-05	0.0761075	hsa-mir-218-2	ENSG00000080819	0	0	1	1	0	0	-0.173849
hg19:2:219267380-219267402:+	ITK|3702	-0.615126	8.42e-05	0.0761075	hsa-mir-26b	ENSG00000113263	1	0	0	0	0	1	-0.0844957
hg19:5:148808540-148808562:+	PTCD1|26024	-0.615126	8.42e-05	0.0761075	hsa-mir-143	ENSG00000106246	1	0	0	1	0	0	-0.0696208
hg19:14:101489677-101489698:+	SEC62|7095	-0.614943	8.47e-05	0.0764275	hsa-mir-411	ENSG00000008952	1	0	0	1	0	0	-0.178438
hg19:13:92002872-92002891:+	KRT85|3891	-0.614897	8.48e-05	0.0764275	hsa-mir-17	ENSG00000135443	0	0	1	1	0	1	-0.160349
hg19:5:136983271-136983293:-	KIAA1199|57214	-0.614846	8.5e-05	0.0764275	hsa-mir-874	ENSG00000103888	1	0	1	0	0	1	-0.505047
hg19:19:13985539-13985561:+	TNFAIP8|25816	-0.614846	8.5e-05	0.0764275	hsa-mir-181c	ENSG00000145779	0	1	1	0	1	1	-0.377621
hg19:6:72086708-72086729:-	SIGLEC10|89790	-0.614846	8.5e-05	0.0764275	hsa-mir-30c-2	ENSG00000142512	1	0	1	0	0	1	-0.35553
hg19:7:130561507-130561530:-	NCALD|83988	-0.614846	8.5e-05	0.0764275	hsa-mir-29a	ENSG00000104490	1	0	0	1	0	0	-0.330021
hg19:17:46657268-46657288:-	LRRC6|23639	-0.614846	8.5e-05	0.0764275	hsa-mir-10a	ENSG00000129295	0	0	1	0	0	1	-0.255555
hg19:9:97847745-97847766:+	ARRB1|408	-0.614846	8.5e-05	0.0764275	hsa-mir-27b	ENSG00000137486	1	0	0	0	0	1	-0.216686
hg19:13:50623305-50623325:-	RNMT|8731	-0.614846	8.5e-05	0.0764275	hsa-mir-15a	ENSG00000101654	1	0	0	1	0	0	-0.061728
hg19:14:65937871-65937893:+	EPS8L1|54869	-0.614846	8.5e-05	0.0764275	hsa-mir-625	ENSG00000131037	1	0	1	1	0	0	-0.0588535
hg19:9:127454798-127454817:+	GGT7|2686	-0.614803	8.51e-05	0.076516	hsa-mir-181a-2	ENSG00000131067	0	0	1	0	0	1	-0.047363
hg19:12:7073276-7073297:+	FAM115C|285966	-0.614792	8.51e-05	0.0765333	hsa-mir-141	ENSG00000170379	1	0	1	0	0	1	-0.0441837
hg19:6:30552109-30552132:+	OPCML|4978	-0.614772	8.52e-05	0.0765745	hsa-mir-877	ENSG00000183715	0	1	0	0	0	1	-0.0255953
hg19:14:101335453-101335474:+	C6orf201|404220	-0.61477	8.52e-05	0.0765757	hsa-mir-493	ENSG00000185689	1	0	0	0	1	0	-0.111525
hg19:17:56408605-56408628:-	NAP1L5|266812	-0.614738	8.53e-05	0.076619	hsa-mir-142	ENSG00000177432	1	0	0	1	0	1	-0.34402
hg19:19:13947408-13947430:-	RPGR|6103	-0.614609	8.57e-05	0.076734	hsa-mir-23a	ENSG00000156313	1	0	0	1	0	1	-0.174226
hg19:7:130561513-130561529:-	HMGCS2|3158	-0.614601	8.57e-05	0.076734	hsa-mir-29a	ENSG00000134240	1	0	0	1	0	0	-0.160216
hg19:1:207975251-207975270:-	HMGCS2|3158	-0.614601	8.57e-05	0.076734	hsa-mir-29c	ENSG00000134240	1	0	0	1	0	0	-0.135979
hg19:7:130561545-130561566:-	KCNK3|3777	-0.614596	8.57e-05	0.076734	hsa-mir-29a	ENSG00000171303	1	0	0	1	0	1	0.0466167
hg19:8:135817125-135817144:-	MET|4233	-0.61459	8.57e-05	0.076734	hsa-mir-30d	ENSG00000105976	1	0	0	0	0	1	-0.147759
hg19:1:207975246-207975268:-	CDH6|1004	-0.614566	8.58e-05	0.076734	hsa-mir-29c	ENSG00000113361	1	0	1	0	0	1	-0.457344
hg19:7:130561507-130561530:-	RASGRP3|25780	-0.614566	8.58e-05	0.076734	hsa-mir-29a	ENSG00000152689	1	1	0	0	0	1	-0.414322
hg19:5:159912379-159912401:+	ELAC1|55520	-0.614566	8.58e-05	0.076734	hsa-mir-146a	ENSG00000141642	0	0	1	1	0	0	-0.394665
hg19:X:133680673-133680695:-	RAP2B|5912	-0.614566	8.58e-05	0.076734	hsa-mir-424	ENSG00000181467	1	0	0	0	1	1	-0.278016
hg19:X:85158648-85158669:-	ESYT3|83850	-0.614566	8.58e-05	0.076734	hsa-mir-361	ENSG00000158220	1	0	1	0	0	1	-0.231794
hg19:11:79113075-79113096:-	KAT5|10524	-0.614566	8.58e-05	0.076734	hsa-mir-708	ENSG00000172977	0	1	1	0	0	1	-0.198072
hg19:X:133675394-133675416:-	UBASH3B|84959	-0.614566	8.58e-05	0.076734	hsa-mir-542	ENSG00000154127	1	0	0	0	1	1	-0.149644
hg19:5:136983271-136983293:-	CLSTN2|64084	-0.614566	8.58e-05	0.076734	hsa-mir-874	ENSG00000158258	0	0	1	0	0	1	-0.14099
hg19:5:148441937-148441958:-	JMY|133746	-0.614566	8.58e-05	0.076734	hsa-mir-584	ENSG00000152409	1	0	0	0	0	1	-0.0387101
hg19:1:207975212-207975230:-	PRRG3|79057	-0.614557	8.58e-05	0.076754	hsa-mir-29c	ENSG00000130032	1	0	0	0	0	1	-0.108374
hg19:14:102026664-102026684:-	WNT3|7473	-0.614511	8.59e-05	0.0768266	hsa-mir-1247	ENSG00000108379	1	0	1	1	0	0	-0.228563
hg19:19:50004088-50004111:-	TRPC5|7224	-0.614479	8.6e-05	0.0768994	hsa-mir-150	ENSG00000072315	1	1	1	0	1	0	-0.121618
hg19:17:57918634-57918658:+	KCNJ13|3769	-0.614372	8.63e-05	0.0770502	hsa-mir-21	ENSG00000115474	1	0	1	1	0	0	-0.616083
hg19:12:54731023-54731046:+	TPM3|7170	-0.61435	8.64e-05	0.0770502	hsa-mir-148b	ENSG00000143549	1	0	0	1	0	0	-0.160642
hg19:X:45606439-45606462:-	CUX2|23316	-0.614338	8.64e-05	0.0770502	hsa-mir-222	ENSG00000111249	0	0	1	1	0	0	-0.293899
hg19:9:97847547-97847568:+	FPR1|2357	-0.614329	8.65e-05	0.0770502	hsa-mir-23b	ENSG00000171051	0	1	0	1	0	0	-0.356954
hg19:10:104196277-104196300:+	EDARADD|128178	-0.614286	8.66e-05	0.0770502	hsa-mir-146b	ENSG00000186197	1	0	0	1	0	1	-0.493485
hg19:X:65238779-65238798:+	WIPF3|644150	-0.614286	8.66e-05	0.0770502	hsa-mir-223	ENSG00000122574	1	0	0	1	0	0	-0.357785
hg19:14:65937871-65937891:+	KIAA1462|57608	-0.614286	8.66e-05	0.0770502	hsa-mir-625	ENSG00000165757	1	0	1	0	0	1	-0.353916
hg19:10:105154057-105154080:-	AEBP2|121536	-0.614286	8.66e-05	0.0770502	hsa-mir-1307	ENSG00000139154	0	1	1	0	0	1	-0.0813809
hg19:11:75046151-75046172:-	DHX34|9704	-0.614285	8.66e-05	0.0770502	hsa-mir-326	ENSG00000134815	1	0	0	0	1	1	-0.176986
hg19:5:159912379-159912403:+	EGFLAM|133584	-0.614189	8.69e-05	0.0772147	hsa-mir-146a	ENSG00000164318	1	0	1	0	1	1	-0.118496
hg19:1:207975800-207975819:-	TADA1|117143	-0.614157	8.7e-05	0.0772781	hsa-mir-29b-2	ENSG00000152382	1	0	0	1	0	0	0.106898
hg19:17:56408645-56408665:-	DNAH17|8632	-0.614049	8.73e-05	0.0773615	hsa-mir-142	ENSG00000187775	0	0	1	0	0	1	-0.387597
hg19:5:136983330-136983351:-	CNOT3|4849	-0.614026	8.74e-05	0.0773615	hsa-mir-874	ENSG00000088038	1	0	0	0	1	1	-0.0348336
hg19:X:45606441-45606462:-	ACACB|32	-0.614006	8.74e-05	0.0773615	hsa-mir-222	ENSG00000076555	0	0	1	0	1	1	-0.45961
hg19:X:45606442-45606463:-	TBC1D4|9882	-0.614006	8.74e-05	0.0773615	hsa-mir-222	ENSG00000136111	0	0	1	0	0	1	-0.409545
hg19:17:57918612-57918634:+	ILF3|3609	-0.614006	8.74e-05	0.0773615	hsa-mir-21	ENSG00000129351	1	0	1	0	0	1	-0.387607
hg19:17:46657269-46657288:-	CDKL3|51265	-0.614006	8.74e-05	0.0773615	hsa-mir-10a	ENSG00000006837	1	0	1	0	1	1	-0.355796
hg19:5:159912379-159912400:+	TCEAL4|79921	-0.614006	8.74e-05	0.0773615	hsa-mir-146a	ENSG00000133142	0	0	1	0	0	1	-0.326544
hg19:1:110141562-110141583:+	DCHS1|8642	-0.614006	8.74e-05	0.0773615	hsa-mir-197	ENSG00000166341	0	0	1	0	0	1	-0.18847
hg19:17:1617207-1617229:-	ZNF10|7556	-0.614006	8.74e-05	0.0773615	hsa-mir-22	ENSG00000256223	1	0	0	0	1	0	-0.177364
hg19:17:46657265-46657288:-	TMEM161B|153396	-0.614006	8.74e-05	0.0773615	hsa-mir-10a	ENSG00000164180	1	0	0	0	1	1	-0.137695
hg19:17:6921297-6921319:-	C17orf104|284071	-0.614006	8.74e-05	0.0773615	hsa-mir-497	ENSG00000180336	1	0	0	0	0	1	-0.115202
hg19:21:17911421-17911443:+	ASTN1|460	-0.614006	8.74e-05	0.0773615	hsa-mir-99a	ENSG00000152092	0	0	1	0	1	0	-0.0332219
hg19:5:148441937-148441958:-	NTRK2|4915	-0.614006	8.74e-05	0.0773615	hsa-mir-584	ENSG00000148053	1	0	0	0	1	1	0.0792468
hg19:13:92002872-92002892:+	GTF2IRD2B|389524	-0.61394	8.76e-05	0.0775022	hsa-mir-17	ENSG00000174428	1	0	1	1	0	0	0.00106249
hg19:7:99691194-99691209:-	OGDH|4967	-0.61393	8.77e-05	0.0775236	hsa-mir-25	ENSG00000105953	0	0	1	0	0	1	0.00457287
hg19:X:49767774-49767794:+	MFSD11|79157	-0.613918	8.77e-05	0.0775488	hsa-mir-532	ENSG00000092931	0	1	0	0	0	1	0.0414625
hg19:17:28444113-28444132:+	TXNDC15|79770	-0.613898	8.77e-05	0.077579	hsa-mir-423	ENSG00000113621	1	0	1	1	0	1	0.0062154
hg19:6:33175632-33175655:+	TNFAIP2|7127	-0.613875	8.78e-05	0.0776172	hsa-mir-219-1	ENSG00000185215	1	1	1	0	0	1	-0.0832286
hg19:3:168269702-168269721:+	PSMD7|5713	-0.613864	8.78e-05	0.0776394	hsa-mir-551b	ENSG00000103035	1	0	1	1	0	0	-0.214782
hg19:14:100576011-100576035:+	EPHA8|2046	-0.613837	8.79e-05	0.0776954	hsa-mir-342	ENSG00000070886	1	0	0	1	0	1	-0.245301
hg19:10:104196277-104196302:+	NFATC3|4775	-0.613768	8.81e-05	0.07775	hsa-mir-146b	ENSG00000072736	1	0	0	1	0	0	-0.495419
hg19:7:130135967-130135988:+	TPBG|7162	-0.613768	8.81e-05	0.07775	hsa-mir-335	ENSG00000146242	1	0	0	1	0	0	-0.354181
hg19:11:64658675-64658696:-	DSC3|1825	-0.613768	8.81e-05	0.07775	hsa-mir-192	ENSG00000134762	1	0	0	0	0	1	-0.141708
hg19:7:129414804-129414829:-	UBE2D2|7322	-0.613738	8.82e-05	0.07775	hsa-mir-183	ENSG00000131508	1	0	0	1	0	0	-0.0416053
hg19:3:188406622-188406643:+	ZNF233|353355	-0.613725	8.83e-05	0.07775	hsa-mir-28	ENSG00000159915	1	1	1	0	0	1	-0.423776
hg19:17:56408607-56408629:-	DDX25|29118	-0.613725	8.83e-05	0.07775	hsa-mir-142	ENSG00000109832	0	0	1	1	0	0	-0.378966
hg19:X:45605610-45605630:-	GTF3C1|2975	-0.613725	8.83e-05	0.07775	hsa-mir-221	ENSG00000077235	0	0	1	0	0	1	-0.376527
hg19:3:188406622-188406644:+	TRAK2|66008	-0.613725	8.83e-05	0.07775	hsa-mir-28	ENSG00000115993	1	0	0	1	0	0	-0.348217
hg19:7:130561507-130561530:-	SGCD|6444	-0.613725	8.83e-05	0.07775	hsa-mir-29a	ENSG00000170624	1	0	1	0	1	1	-0.299184
hg19:17:28444113-28444136:+	TMEM176B|28959	-0.613725	8.83e-05	0.07775	hsa-mir-423	ENSG00000106565	0	0	1	0	1	0	-0.286039
hg19:21:17911422-17911442:+	FPR1|2357	-0.613725	8.83e-05	0.07775	hsa-mir-99a	ENSG00000171051	0	1	1	0	0	1	-0.27754
hg19:5:136983270-136983293:-	SPON1|10418	-0.613725	8.83e-05	0.07775	hsa-mir-874	ENSG00000262655	0	0	1	0	0	1	-0.26697
hg19:16:69967049-69967072:+	PVRL4|81607	-0.613725	8.83e-05	0.07775	hsa-mir-140	ENSG00000143217	0	0	1	1	0	1	-0.25237
hg19:X:45606440-45606463:-	ADH1B|125	-0.613725	8.83e-05	0.07775	hsa-mir-222	ENSG00000196616	1	0	1	1	0	1	-0.186321
hg19:1:155165028-155165047:+	GALC|2581	-0.613725	8.83e-05	0.07775	hsa-mir-92b	ENSG00000054983	0	1	0	0	1	0	-0.0862699
hg19:17:46657266-46657288:-	SPIRE1|56907	-0.613725	8.83e-05	0.07775	hsa-mir-10a	ENSG00000134278	0	0	1	0	1	0	-0.0692433
hg19:16:67236230-67236252:-	COL21A1|81578	-0.613725	8.83e-05	0.07775	hsa-mir-328	ENSG00000124749	0	0	1	0	0	1	0.053893
hg19:2:177015058-177015073:+	ZBTB25|7597	-0.613713	8.83e-05	0.0777729	hsa-mir-10b	ENSG00000089775	0	0	1	0	0	1	0.0301167
hg19:X:49774343-49774364:+	LPAR5|57121	-0.613679	8.84e-05	0.0778434	hsa-mir-501	ENSG00000184574	1	0	1	1	0	0	-0.323793
hg19:17:28444148-28444171:+	PLEKHG1|57480	-0.613628	8.86e-05	0.0779224	hsa-mir-423	ENSG00000120278	0	0	1	0	0	1	-0.20707
hg19:17:1617209-1617230:-	TIGD7|91151	-0.613628	8.86e-05	0.0779224	hsa-mir-22	ENSG00000140993	0	0	1	0	1	0	-0.0849817
hg19:7:130135967-130135987:+	PLAG1|5324	-0.613569	8.87e-05	0.0780351	hsa-mir-335	ENSG00000181690	1	0	0	1	0	1	-0.0591225
hg19:20:57392683-57392703:-	DPF1|8193	-0.613556	8.88e-05	0.0780546	hsa-mir-296	ENSG00000011332	1	0	0	0	1	0	-0.246821
hg19:7:99691194-99691214:-	DBP|1628	-0.61354	8.88e-05	0.0780546	hsa-mir-25	ENSG00000105516	1	0	0	1	1	0	0.0943959
hg19:19:46142268-46142289:-	DOCK3|1795	-0.613499	8.89e-05	0.0780546	hsa-mir-330	ENSG00000260587	0	0	1	0	0	1	-0.00603805
hg19:12:7072910-7072927:+	PTPN2|5771	-0.613493	8.9e-05	0.0780546	hsa-mir-200c	ENSG00000175354	1	0	1	1	0	0	-0.127622
hg19:17:46114541-46114561:-	GTF2IRD1|9569	-0.613488	8.9e-05	0.0780546	hsa-mir-152	ENSG00000006704	1	0	0	0	1	0	-0.369807
hg19:19:52196521-52196542:+	SAMD5|389432	-0.613488	8.9e-05	0.0780546	hsa-mir-125a	ENSG00000203727	0	0	1	0	0	1	-0.152836
hg19:5:136983271-136983293:-	KRT17|3872	-0.613445	8.91e-05	0.0780546	hsa-mir-874	ENSG00000128422	0	1	1	0	0	1	-0.413114
hg19:17:11985226-11985247:+	FOXC1|2296	-0.613445	8.91e-05	0.0780546	hsa-mir-744	ENSG00000054598	1	0	0	0	0	1	-0.320979
hg19:3:188406623-188406644:+	DKC1|1736	-0.613445	8.91e-05	0.0780546	hsa-mir-28	ENSG00000130826	0	0	1	0	0	1	-0.180483
hg19:2:219866369-219866392:-	PTPRO|5800	-0.613445	8.91e-05	0.0780546	hsa-mir-375	ENSG00000151490	1	0	0	0	1	1	0.0984809
hg19:X:118780728-118780748:-	LIG1|3978	-0.613444	8.91e-05	0.0780564	hsa-mir-766	ENSG00000105486	1	0	0	0	1	1	-0.0290464
hg19:X:49775327-49775350:+	PTPRB|5787	-0.613429	8.92e-05	0.0780875	hsa-mir-500b	ENSG00000127329	0	0	1	1	0	1	0.0435069
hg19:17:57918634-57918652:+	TG|7038	-0.613304	8.95e-05	0.0783109	hsa-mir-21	ENSG00000042832	1	0	1	0	0	1	-0.529778
hg19:X:133303572-133303596:-	HUWE1|10075	-0.613304	8.95e-05	0.0783109	hsa-mir-92a-2	ENSG00000086758	0	0	1	1	1	1	-0.0189509
hg19:1:41220084-41220103:+	C7orf69|80099	-0.613297	8.95e-05	0.0783228	hsa-mir-30e	ENSG00000136275	0	0	1	0	0	1	-0.33128
hg19:19:13947262-13947282:-	KLHL15|80311	-0.613251	8.97e-05	0.0783479	hsa-mir-27a	ENSG00000174010	1	0	0	1	0	0	-0.356621
hg19:13:50570564-50570586:-	AQP3|360	-0.613226	8.98e-05	0.0783479	hsa-mir-3613	ENSG00000165272	1	0	0	0	0	1	0.0327483
hg19:17:79099689-79099709:-	DCBLD2|131566	-0.613208	8.98e-05	0.0783479	hsa-mir-338	ENSG00000057019	1	0	0	1	0	1	-0.4425
hg19:9:97847787-97847808:+	CD300LF|146722	-0.613208	8.98e-05	0.0783479	hsa-mir-27b	ENSG00000186074	0	0	1	0	0	1	-0.143725
hg19:7:27209147-27209169:-	SULT1A1|6817	-0.613208	8.98e-05	0.0783479	hsa-mir-196b	ENSG00000196502	1	1	0	0	0	1	-0.0932289
hg19:3:183959193-183959217:+	PRCP|5547	-0.613173	8.99e-05	0.0783479	hsa-mir-1224	ENSG00000137509	0	1	0	0	1	0	-0.00327265
hg19:1:41220043-41220066:+	ARID5B|84159	-0.613165	9e-05	0.0783479	hsa-mir-30e	ENSG00000150347	1	0	0	1	1	0	-0.369775
hg19:22:20020711-20020731:+	SMTN|6525	-0.613165	9e-05	0.0783479	hsa-mir-185	ENSG00000183963	0	0	1	0	1	1	-0.289842
hg19:11:64658674-64658696:-	FSTL1|11167	-0.613165	9e-05	0.0783479	hsa-mir-192	ENSG00000163430	1	0	0	1	0	0	-0.283876
hg19:17:57918633-57918657:+	NFIX|4784	-0.613165	9e-05	0.0783479	hsa-mir-21	ENSG00000008441	1	0	1	1	0	0	-0.196946
hg19:X:49773576-49773599:+	COL21A1|81578	-0.613165	9e-05	0.0783479	hsa-mir-362	ENSG00000124749	1	0	1	0	0	1	-0.177709
hg19:7:129410286-129410304:-	THRA|7067	-0.613077	9.02e-05	0.0785327	hsa-mir-182	ENSG00000126351	0	0	1	0	0	1	-0.0288528
hg19:2:177015059-177015081:+	SS18L1|26039	-0.613057	9.03e-05	0.0785625	hsa-mir-10b	ENSG00000184402	1	0	0	1	0	0	0.0131369
hg19:3:183959193-183959217:+	LRRC8C|84230	-0.613032	9.04e-05	0.0786142	hsa-mir-1224	ENSG00000171488	1	0	1	0	0	1	0.138595
hg19:5:148441938-148441958:-	RAB17|64284	-0.613014	9.04e-05	0.078654	hsa-mir-584	ENSG00000124839	0	1	0	1	0	0	0.149687
hg19:10:104196277-104196301:+	RELN|5649	-0.612971	9.05e-05	0.0786669	hsa-mir-146b	ENSG00000189056	1	0	1	0	0	1	-0.213179
hg19:7:130135971-130135989:+	CES2|8824	-0.612958	9.06e-05	0.0786669	hsa-mir-335	ENSG00000172831	1	0	1	1	0	0	0.0404354
hg19:8:135817123-135817144:-	ACTR3|10096	-0.612928	9.07e-05	0.0786669	hsa-mir-30d	ENSG00000115091	1	0	0	1	0	0	-0.325628
hg19:7:129410286-129410311:-	ACSL5|51703	-0.612928	9.07e-05	0.0786669	hsa-mir-182	ENSG00000197142	0	1	0	1	0	1	-0.214696
hg19:10:104196276-104196298:+	IPCEF1|26034	-0.612885	9.08e-05	0.0786669	hsa-mir-146b	ENSG00000074706	0	0	1	1	0	0	-0.475921
hg19:12:7072904-7072926:+	SELP|6403	-0.612885	9.08e-05	0.0786669	hsa-mir-200c	ENSG00000174175	0	0	1	0	0	1	-0.375994
hg19:7:130135967-130135989:+	SERPINB8|5271	-0.612885	9.08e-05	0.0786669	hsa-mir-335	ENSG00000166401	1	0	0	1	0	0	-0.337399
hg19:9:116971729-116971751:+	ZWINT|11130	-0.612885	9.08e-05	0.0786669	hsa-mir-455	ENSG00000122952	1	0	0	1	0	0	-0.314656
hg19:3:188406623-188406645:+	EPOR|2057	-0.612885	9.08e-05	0.0786669	hsa-mir-28	ENSG00000187266	1	0	1	0	0	1	-0.312444
hg19:X:85158648-85158669:-	KCTD7|154881	-0.612885	9.08e-05	0.0786669	hsa-mir-361	ENSG00000243335	1	0	0	1	0	1	-0.174266
hg19:7:99691627-99691647:-	SALL1|6299	-0.612885	9.08e-05	0.0786669	hsa-mir-106b	ENSG00000103449	0	1	1	1	0	0	-0.170782
hg19:3:183959193-183959214:+	PHF19|26147	-0.612837	9.1e-05	0.0787755	hsa-mir-1224	ENSG00000119403	1	0	1	1	0	1	0.0899986
hg19:1:41220043-41220065:+	PCDHB3|56132	-0.612831	9.1e-05	0.07878	hsa-mir-30e	ENSG00000113205	0	0	1	0	0	1	-0.111441
hg19:14:65937834-65937854:+	C14orf1|11161	-0.612826	9.1e-05	0.078789	hsa-mir-625	ENSG00000133935	0	1	0	1	0	0	0.00583273
hg19:14:101506606-101506628:+	DMXL1|1657	-0.612815	9.1e-05	0.0788088	hsa-mir-654	ENSG00000172869	0	0	1	0	0	1	-0.0107818
hg19:14:101347406-101347427:+	ZXDA|7789	-0.612729	9.13e-05	0.0789579	hsa-mir-431	ENSG00000198205	1	0	0	1	0	0	0.00280328
hg19:17:56408607-56408627:-	MTHFD2L|441024	-0.612654	9.15e-05	0.0789662	hsa-mir-142	ENSG00000163738	1	0	0	1	0	0	-0.214237
hg19:19:52196521-52196543:+	NTN1|9423	-0.612648	9.15e-05	0.0789662	hsa-mir-125a	ENSG00000065320	1	0	0	1	0	1	-0.33128
hg19:9:131007024-131007045:-	ZNF790|388536	-0.612605	9.17e-05	0.0789662	hsa-mir-199b	ENSG00000197863	1	1	0	0	0	1	-0.44583
hg19:3:188406623-188406645:+	IQUB|154865	-0.612605	9.17e-05	0.0789662	hsa-mir-28	ENSG00000164675	0	1	0	0	0	1	-0.390381
hg19:10:105154058-105154080:-	PLXNA4|91584	-0.612605	9.17e-05	0.0789662	hsa-mir-1307	ENSG00000221866	0	0	1	0	1	1	-0.205428
hg19:1:209605511-209605533:+	RNF41|10193	-0.612605	9.17e-05	0.0789662	hsa-mir-205	ENSG00000181852	1	0	0	1	1	0	-0.116265
hg19:17:46657270-46657289:-	FLRT3|23767	-0.612605	9.17e-05	0.0789662	hsa-mir-10a	ENSG00000125848	1	0	0	0	1	1	0.00357833
hg19:7:25989547-25989564:-	ACVR2A|92	-0.612546	9.19e-05	0.0790909	hsa-mir-148a	ENSG00000121989	0	0	1	0	1	0	-0.064064
hg19:10:53059348-53059370:+	RASGRF1|5923	-0.612524	9.19e-05	0.0791368	hsa-mir-605	ENSG00000058335	0	1	0	0	1	0	-0.149089
hg19:4:20529961-20529982:+	ARMC3|219681	-0.612519	9.19e-05	0.0791461	hsa-mir-218-1	ENSG00000165309	0	0	1	0	0	1	-0.190949
hg19:21:17912158-17912180:+	ITGB6|3694	-0.612508	9.2e-05	0.0791461	hsa-let-7c	ENSG00000115221	1	0	0	0	0	1	-0.365637
hg19:3:49058065-49058086:-	KPNA6|23633	-0.612502	9.2e-05	0.079156	hsa-mir-191	ENSG00000025800	0	0	1	0	0	1	-0.0210784
hg19:8:135817123-135817143:-	GABRB2|2561	-0.612487	9.2e-05	0.0791869	hsa-mir-30d	ENSG00000145864	1	0	0	1	0	1	-0.123784
hg19:1:41220043-41220069:+	SCN2B|6327	-0.612429	9.22e-05	0.0792475	hsa-mir-30e	ENSG00000149575	1	0	0	1	0	0	-0.0230219
hg19:3:49057634-49057655:-	KIAA0408|9729	-0.612388	9.23e-05	0.0792475	hsa-mir-425	ENSG00000189367	1	0	0	0	0	1	-0.115351
hg19:X:49774343-49774366:+	ITGB1BP1|9270	-0.612379	9.24e-05	0.0792475	hsa-mir-501	ENSG00000119185	1	0	0	1	0	0	-0.00576909
hg19:17:79099689-79099709:-	ARNTL2|56938	-0.612368	9.24e-05	0.0792475	hsa-mir-338	ENSG00000029153	1	0	0	1	0	1	-0.569147
hg19:1:41220044-41220066:+	PRDM8|56978	-0.612368	9.24e-05	0.0792475	hsa-mir-30e	ENSG00000152784	1	1	0	0	0	1	-0.291135
hg19:X:45606441-45606462:-	KLHL8|57563	-0.612325	9.25e-05	0.0792475	hsa-mir-222	ENSG00000145332	1	0	1	1	0	1	-0.32851
hg19:3:188406622-188406642:+	NKRF|55922	-0.612325	9.25e-05	0.0792475	hsa-mir-28	ENSG00000186416	0	0	1	0	1	0	-0.307585
hg19:2:219267380-219267403:+	SP140|11262	-0.612325	9.25e-05	0.0792475	hsa-mir-26b	ENSG00000079263	0	0	1	0	0	1	-0.262166
hg19:17:56408606-56408629:-	LCMT2|9836	-0.612325	9.25e-05	0.0792475	hsa-mir-142	ENSG00000168806	1	0	0	1	0	0	-0.247263
hg19:7:129414580-129414602:-	APOL3|80833	-0.612325	9.25e-05	0.0792475	hsa-mir-96	ENSG00000128284	1	1	1	0	1	0	-0.209715
hg19:X:151128149-151128169:-	AP2A2|161	-0.612325	9.25e-05	0.0792475	hsa-mir-452	ENSG00000183020	0	0	1	1	0	1	-0.0527951
hg19:13:50623305-50623325:-	INPP4A|3631	-0.612325	9.25e-05	0.0792475	hsa-mir-15a	ENSG00000040933	0	0	1	1	1	1	0.0624052
hg19:15:59463392-59463413:-	KIFC3|3801	-0.612284	9.27e-05	0.0793344	hsa-mir-2116	ENSG00000140859	0	0	1	0	0	1	-0.0702367
hg19:7:130562249-130562266:-	PPFIBP2|8495	-0.612213	9.29e-05	0.0794512	hsa-mir-29b-1	ENSG00000166387	0	0	1	0	0	1	0.0483099
hg19:19:50004088-50004111:-	TYRO3|7301	-0.61219	9.3e-05	0.0795006	hsa-mir-150	ENSG00000092445	1	0	1	0	0	1	-0.166185
hg19:X:45606444-45606463:-	LRP2|4036	-0.612045	9.34e-05	0.0795828	hsa-mir-222	ENSG00000081479	1	0	1	1	0	1	-0.461821
hg19:10:104196277-104196296:+	FAM35A|54537	-0.612045	9.34e-05	0.0795828	hsa-mir-146b	ENSG00000122376	1	0	1	1	0	1	-0.442184
hg19:5:136983271-136983292:-	CDC25B|994	-0.612045	9.34e-05	0.0795828	hsa-mir-874	ENSG00000101224	0	1	1	1	0	0	-0.420034
hg19:17:1953223-1953245:-	ZYG11A|440590	-0.612045	9.34e-05	0.0795828	hsa-mir-132	ENSG00000203995	0	0	1	0	0	1	-0.341152
hg19:2:219267380-219267402:+	UBASH3B|84959	-0.612045	9.34e-05	0.0795828	hsa-mir-26b	ENSG00000154127	1	0	0	0	0	1	-0.24714
hg19:19:52196501-52196521:+	METTL8|79828	-0.612045	9.34e-05	0.0795828	hsa-mir-125a	ENSG00000123600	0	1	0	0	1	0	-0.181527
hg19:12:62997527-62997547:+	THBS1|7057	-0.612045	9.34e-05	0.0795828	hsa-let-7i	ENSG00000137801	0	0	1	1	0	0	-0.00451962
hg19:11:72326113-72326133:-	PCDHGA1|56114	-0.611999	9.36e-05	0.0796754	hsa-mir-139	ENSG00000204956	1	0	0	0	0	1	0.0660523
hg19:5:85916358-85916384:+	OPCML|4978	-0.611993	9.36e-05	0.0796864	hsa-mir-3607	ENSG00000183715	1	0	0	1	0	0	-0.176112
hg19:X:49773613-49773635:+	CD164|8763	-0.611832	9.41e-05	0.0798965	hsa-mir-362	ENSG00000135535	0	0	1	1	0	0	0.071718
hg19:7:129414807-129414830:-	SLC16A14|151473	-0.611808	9.42e-05	0.0798965	hsa-mir-183	ENSG00000163053	0	1	0	1	0	0	0.149296
hg19:17:28444148-28444170:+	TSPAN11|441631	-0.611765	9.43e-05	0.0798965	hsa-mir-423	ENSG00000110900	1	1	1	1	0	1	-0.355354
hg19:3:49058105-49058128:-	TFPI|7035	-0.611765	9.43e-05	0.0798965	hsa-mir-191	ENSG00000003436	1	0	0	0	1	0	-0.264742
hg19:X:45605610-45605631:-	CAMK1D|57118	-0.611765	9.43e-05	0.0798965	hsa-mir-221	ENSG00000183049	1	0	0	0	0	1	-0.231868
hg19:7:129414809-129414828:-	JAZF1|221895	-0.611765	9.43e-05	0.0798965	hsa-mir-183	ENSG00000153814	1	0	0	0	0	1	-0.217411
hg19:17:11985226-11985247:+	MN1|4330	-0.611765	9.43e-05	0.0798965	hsa-mir-744	ENSG00000169184	1	0	0	0	1	1	-0.162652
hg19:7:129414805-129414829:-	FMNL3|91010	-0.611765	9.43e-05	0.0798965	hsa-mir-183	ENSG00000161791	0	0	1	1	0	0	-0.15034
hg19:7:99691626-99691647:-	HSPA1L|3305	-0.611765	9.43e-05	0.0798965	hsa-mir-106b	ENSG00000226704	0	0	1	0	0	1	-0.148806
hg19:9:127454796-127454819:+	NUTF2|10204	-0.611765	9.43e-05	0.0798965	hsa-mir-181a-2	ENSG00000102898	1	0	1	1	0	0	-0.136892
hg19:X:151128150-151128170:-	ZNF319|57567	-0.61163	9.47e-05	0.0801641	hsa-mir-452	ENSG00000166188	0	0	1	0	1	0	-0.0976342
hg19:15:55665152-55665173:-	PLEKHG4|25894	-0.611578	9.49e-05	0.0802536	hsa-mir-628	ENSG00000196155	0	0	1	0	0	1	-0.0577113
hg19:10:104196276-104196297:+	AACS|65985	-0.611547	9.5e-05	0.0802536	hsa-mir-146b	ENSG00000081760	0	1	0	0	1	1	-0.381951
hg19:12:54731062-54731084:+	PPAP2C|8612	-0.611485	9.52e-05	0.0802536	hsa-mir-148b	ENSG00000141934	1	0	0	1	0	0	-0.213502
hg19:2:219866371-219866391:-	BST1|683	-0.611485	9.52e-05	0.0802536	hsa-mir-375	ENSG00000109743	0	0	1	0	0	1	-0.186183
hg19:2:177015057-177015076:+	AGL|178	-0.611485	9.52e-05	0.0802536	hsa-mir-10b	ENSG00000162688	1	1	1	1	1	0	-0.0542903
hg19:X:49767773-49767794:+	FGFR1|2260	-0.611485	9.52e-05	0.0802536	hsa-mir-532	ENSG00000077782	0	1	0	1	1	1	-0.0494796
hg19:19:52195874-52195893:+	MFAP3L|9848	-0.61143	9.54e-05	0.0803734	hsa-mir-99b	ENSG00000198948	0	1	0	1	0	0	-0.0406665
hg19:17:79099687-79099709:-	DUSP10|11221	-0.611387	9.55e-05	0.080443	hsa-mir-338	ENSG00000143507	1	0	0	0	1	0	-0.359465
hg19:5:148441938-148441958:-	FUZ|80199	-0.611333	9.57e-05	0.0805537	hsa-mir-584	ENSG00000010361	1	0	1	0	0	1	-0.101336
hg19:1:110141562-110141583:+	NCL|4691	-0.611247	9.6e-05	0.0805985	hsa-mir-197	ENSG00000115053	0	1	0	1	0	1	-0.0954449
hg19:14:101492408-101492429:+	EPB41L1|2036	-0.611247	9.6e-05	0.0805985	hsa-mir-758	ENSG00000088367	1	0	0	1	0	0	-0.00179745
hg19:5:58999457-58999477:-	GABRB2|2561	-0.611214	9.61e-05	0.0805985	hsa-mir-582	ENSG00000145864	0	0	1	1	0	0	-0.267188
hg19:2:177015057-177015076:+	CNNM1|26507	-0.611209	9.61e-05	0.0805985	hsa-mir-10b	ENSG00000119946	1	0	1	0	0	1	0.131026
hg19:11:64658674-64658696:-	FLNC|2318	-0.611205	9.61e-05	0.0805985	hsa-mir-192	ENSG00000128591	0	0	1	0	0	1	-0.412342
hg19:1:41220085-41220103:+	NET1|10276	-0.611205	9.61e-05	0.0805985	hsa-mir-30e	ENSG00000173848	1	0	1	1	0	0	-0.245061
hg19:17:29887035-29887057:+	PPP1R1B|84152	-0.611205	9.61e-05	0.0805985	hsa-mir-193a	ENSG00000131771	1	0	1	1	1	1	-0.237239
hg19:5:148441936-148441958:-	PILRB|29990	-0.611205	9.61e-05	0.0805985	hsa-mir-584	ENSG00000121716	0	1	0	0	1	0	-0.151331
hg19:13:92003326-92003346:+	SLCO4C1|353189	-0.611193	9.61e-05	0.0806189	hsa-mir-20a	ENSG00000173930	1	0	0	1	0	1	-0.00801245
hg19:5:148808543-148808563:+	TPCN1|53373	-0.61118	9.62e-05	0.0806458	hsa-mir-143	ENSG00000186815	1	0	0	0	1	1	0.0551136
hg19:16:69967045-69967064:+	TMCO4|255104	-0.611148	9.63e-05	0.0807092	hsa-mir-140	ENSG00000162542	0	0	1	1	0	1	0.0503044
hg19:16:69967045-69967062:+	LHX4|89884	-0.611144	9.63e-05	0.0807186	hsa-mir-140	ENSG00000121454	1	0	0	1	0	0	0.0219539
hg19:17:46657274-46657289:-	ZDBF2|57683	-0.611093	9.65e-05	0.0807991	hsa-mir-10a	ENSG00000204186	0	0	1	0	0	1	-0.0188797
hg19:12:95702256-95702275:+	ASXL3|80816	-0.611041	9.66e-05	0.0808862	hsa-mir-331	ENSG00000141431	1	0	1	1	0	1	0.0630565
hg19:14:65937871-65937891:+	LOXHD1|125336	-0.611018	9.67e-05	0.0808862	hsa-mir-625	ENSG00000167210	0	1	1	0	0	1	-0.303652
hg19:9:20716153-20716175:+	GALNT5|11227	-0.61098	9.68e-05	0.0808862	hsa-mir-491	ENSG00000136542	1	0	0	0	0	1	-0.25607
hg19:9:139565105-139565122:+	SCRN1|9805	-0.610975	9.68e-05	0.0808862	hsa-mir-126	ENSG00000136193	1	0	0	1	0	0	-0.212269
hg19:19:50004091-50004113:-	GDF9|2661	-0.610924	9.7e-05	0.0808862	hsa-mir-150	ENSG00000164404	0	0	1	0	0	1	-0.506892
hg19:16:69967048-69967069:+	FANCE|2178	-0.610924	9.7e-05	0.0808862	hsa-mir-140	ENSG00000112039	1	0	0	0	0	1	-0.352958
hg19:11:64658674-64658696:-	FLRT2|23768	-0.610924	9.7e-05	0.0808862	hsa-mir-192	ENSG00000185070	0	1	0	1	0	0	-0.329935
hg19:12:62997471-62997493:+	ERG|2078	-0.610924	9.7e-05	0.0808862	hsa-let-7i	ENSG00000157554	1	0	1	0	0	1	-0.307514
hg19:17:19247826-19247848:-	ABLIM3|22885	-0.610924	9.7e-05	0.0808862	hsa-mir-1180	ENSG00000173210	0	1	0	0	0	1	-0.272975
hg19:1:155165028-155165047:+	TNS1|7145	-0.610924	9.7e-05	0.0808862	hsa-mir-92b	ENSG00000079308	0	1	0	0	1	1	-0.17509
hg19:1:209605511-209605533:+	SS18L1|26039	-0.610924	9.7e-05	0.0808862	hsa-mir-205	ENSG00000184402	1	0	0	1	0	0	-0.122905
hg19:1:71533368-71533386:-	TTN|7273	-0.610869	9.72e-05	0.0809959	hsa-mir-186	ENSG00000155657	1	1	1	0	0	1	0.0413376
hg19:14:101528393-101528415:+	CBR4|84869	-0.61086	9.72e-05	0.0810151	hsa-mir-377	ENSG00000145439	1	0	0	1	0	0	-0.140807
hg19:5:148808539-148808562:+	SMARCA4|6597	-0.610815	9.74e-05	0.0810869	hsa-mir-143	ENSG00000127616	0	0	1	0	0	1	-0.108231
hg19:19:52196560-52196580:+	TBX3|6926	-0.610806	9.74e-05	0.0811073	hsa-mir-125a	ENSG00000135111	0	1	0	0	0	1	0.0775511
hg19:7:99691687-99691707:-	DEF8|54849	-0.610732	9.76e-05	0.0812106	hsa-mir-106b	ENSG00000140995	1	0	1	1	0	1	-0.084775
hg19:17:57918634-57918656:+	LRTM2|654429	-0.610695	9.78e-05	0.0812106	hsa-mir-21	ENSG00000166159	1	0	0	1	0	1	-0.565129
hg19:1:207975249-207975269:-	SEMA6D|80031	-0.610687	9.78e-05	0.0812106	hsa-mir-29c	ENSG00000137872	0	0	1	0	1	0	-0.0471543
hg19:X:146341214-146341236:-	FNDC1|84624	-0.610648	9.79e-05	0.0812106	hsa-mir-509-3	ENSG00000164694	0	0	1	1	0	1	-0.230891
hg19:17:11985226-11985247:+	AEBP1|165	-0.610644	9.79e-05	0.0812106	hsa-mir-744	ENSG00000106624	0	0	1	0	0	1	-0.409401
hg19:6:72086708-72086729:-	RALB|5899	-0.610644	9.79e-05	0.0812106	hsa-mir-30c-2	ENSG00000144118	0	1	0	1	0	0	-0.311055
hg19:17:56408646-56408667:-	TDRD3|81550	-0.610644	9.79e-05	0.0812106	hsa-mir-142	ENSG00000083544	1	0	0	0	0	1	-0.305077
hg19:1:110141562-110141584:+	TAF15|8148	-0.610644	9.79e-05	0.0812106	hsa-mir-197	ENSG00000172660	1	0	0	0	0	1	-0.177948
hg19:12:7073318-7073338:+	FADS1|3992	-0.610644	9.79e-05	0.0812106	hsa-mir-141	ENSG00000149485	0	1	0	1	1	1	0.015253
hg19:7:99691440-99691460:-	DOCK6|57572	-0.610642	9.79e-05	0.0812143	hsa-mir-93	ENSG00000130158	0	0	1	0	0	1	-0.107861
hg19:3:188406621-188406644:+	AEBP2|121536	-0.61062	9.8e-05	0.0812609	hsa-mir-28	ENSG00000139154	1	0	0	0	1	0	-0.0779322
hg19:14:100576052-100576077:+	GFRA2|2675	-0.610586	9.81e-05	0.0813322	hsa-mir-342	ENSG00000168546	1	0	0	1	1	1	-0.0428121
hg19:14:100576052-100576072:+	PCDHAC2|56134	-0.610571	9.82e-05	0.0813638	hsa-mir-342	ENSG00000243232	0	0	1	0	0	1	0.0156502
hg19:17:28444113-28444132:+	EGR1|1958	-0.610535	9.83e-05	0.0814201	hsa-mir-423	ENSG00000120738	0	0	1	1	0	1	-0.219623
hg19:11:111383676-111383699:+	SMPDL3A|10924	-0.610529	9.83e-05	0.081434	hsa-mir-34b	ENSG00000172594	0	1	0	0	1	1	0.0503102
hg19:21:17912157-17912179:+	PTPRZ1|5803	-0.61045	9.86e-05	0.0815279	hsa-let-7c	ENSG00000106278	0	0	1	0	0	1	-0.314791
hg19:19:13985540-13985561:+	NOD2|64127	-0.610391	9.88e-05	0.0815279	hsa-mir-181c	ENSG00000167207	0	1	0	0	0	1	-0.174123
hg19:10:104196277-104196301:+	DGKI|9162	-0.610364	9.89e-05	0.0815279	hsa-mir-146b	ENSG00000157680	1	0	0	0	1	1	-0.524595
hg19:21:26946295-26946319:+	DET1|55070	-0.610364	9.89e-05	0.0815279	hsa-mir-155	ENSG00000140543	1	0	0	1	0	0	-0.412713
hg19:17:28444149-28444171:+	C14orf132|56967	-0.610364	9.89e-05	0.0815279	hsa-mir-423	ENSG00000227051	1	0	0	0	1	0	-0.274753
hg19:9:97847745-97847766:+	NLRC5|84166	-0.610364	9.89e-05	0.0815279	hsa-mir-27b	ENSG00000140853	1	0	1	0	0	1	-0.241666
hg19:7:5535504-5535526:-	AOC3|8639	-0.610364	9.89e-05	0.0815279	hsa-mir-589	ENSG00000131471	1	0	0	1	0	0	-0.216068
hg19:1:207975209-207975232:-	LFNG|3955	-0.610364	9.89e-05	0.0815279	hsa-mir-29c	ENSG00000106003	1	0	0	0	0	1	-0.208746
hg19:11:64658674-64658696:-	PRUNE2|158471	-0.610364	9.89e-05	0.0815279	hsa-mir-192	ENSG00000106772	1	0	0	0	0	1	-0.190708
hg19:10:105154056-105154079:-	ROBO4|54538	-0.610364	9.89e-05	0.0815279	hsa-mir-1307	ENSG00000154133	0	1	1	0	0	1	-0.168523
[truncated: 629 more rows]
