# Supplementary material for: Differences in miRNA and mRNA Profile of Papillary Thyroid Cancer Variants
Source: Int J Endocrinol. 2016 Aug 30;2016:1427042. doi: 10.1155/2016/1427042 (PMC5021476; doi:10.1155/2016/1427042)
Supplement: Supplementary file 1 — Figure illustrates clustering of data due to batch effects present in TCGA miRNA and mRNA datasets (A, C). Samples sequenced in one batch are marked with the same color. After batch removal procedure clustering effects are not observed (B, D). Supplementary File 2. Figure illustrates analysis pipeline for 2 datasets - 466 samples. It provides overview how the study was designed. [file 1427042.f1.zip › Supplementary_File_1_Sample_Annotations_131121.txt]

bcr_patient_barcode	age_at_initial_pathologic_diagnosis	b_symptoms	bcr_patient_uuid	braf_gene_genotyping_outcome_lab_results_text	clinical_M	clinical_N	clinical_T	clinical_stage	date_of_form_completion	days_to_birth	days_to_death	days_to_initial_pathologic_diagnosis	days_to_last_followup	days_to_psa	ethnicity	extranodal_involvement	extrathyroid_carcinoma_present_extension_status	first_degree_relative_history_thyroid_gland_carcinoma_diagnosis_relationship_type	gender	genotype_analysis_performed_indicator	genotyping_results_gene_mutation_not_reported_reason	gleason_score	histological_type	histological_type_other	history_of_neoadjuvant_treatment	i_131_first_administered_dose	i_131_subsequent_administered_dose	i_131_total_administered_dose	i_131_total_administered_preparation_technique	icd_10	icd_o_3_histology	icd_o_3_site	informed_consent_verified	lymph_node_examined_count	lymph_node_preoperative_assessment_diagnostic_imaging_type	lymph_node_preoperative_scan_indicator	malignant_neoplasm_metastatic_involvement_site	metastatic_neoplasm_confirmed_diagnosis_method_name	metastatic_neoplasm_confirmed_diagnosis_method_text	neoplasm_depth	neoplasm_length	neoplasm_width	new_tumor_event_after_initial_treatment	number_of_lymphnodes_positive_by_he	other_genotyping_outcome_lab_results_text	other_metastatic_involvement_anatomic_site	pathologic_M	pathologic_N	pathologic_T
1	TCGA-BJ-A0YZ	65	[Not Applicable]	f3ee888e-5116-4313-a2f6-3b1dcc3e4bc1	[Not Available]	[Not Applicable]	[Not Applicable]	[Not Applicable]	[Not Applicable]	2011-04-11	-24102	[Not Applicable]	0	479	[Not Applicable]	NOT HISPANIC OR LATINO	[Not Applicable]	None	[Not Available]	MALE	[Not Available]	[Not Available]|[Not Available]|[Not Available]	[Not Applicable]	Thyroid Papillary Carcinoma - Classical/usual	[Not Applicable]	No	[Not Available]	[Not Available]	[Not Available]	[Not Available]	C73	mar-60	C73.9	YES	[Not Available]	Ultrasound	[Not Available]	[Not Available]	[Not Available]	[Not Available]	[Not Available]	3	.5	[Not Available]	[Not Available]	[Not Available]	[Not Applicable]	M0	N0
2	TCGA-BJ-A0Z0	55	[Not Applicable]	72d8dcc3-0709-4fd1-98d4-fb75e9340758	[Not Available]	[Not Applicable]	[Not Applicable]	[Not Applicable]	[Not Applicable]	2011-04-15	-20361	[Not Applicable]	0	356	[Not Applicable]	NOT HISPANIC OR LATINO	[Not Applicable]	None	[Not Available]	MALE	[Not Available]	[Not Available]|[Not Available]|[Not Available]	[Not Applicable]	Thyroid Papillary Carcinoma - Classical/usual	[Not Applicable]	No	[Not Available]	[Not Available]	[Not Available]	[Not Available]	C73	mar-60	C73.9	YES	5	Ultrasound|CT with contrast	NO	[Not Available]	[Not Available]	[Not Available]	[Not Available]	3.5	2.4	[Not Available]	0	[Not Available]	[Not Applicable]	MX	N0
3	TCGA-BJ-A0Z2	57	[Not Applicable]	f9ceffc0-d544-418d-b4a9-bd3c84e37026	[Not Available]	[Not Applicable]	[Not Applicable]	[Not Applicable]	[Not Applicable]	2011-04-15	-21007	[Not Applicable]	0	232	[Not Applicable]	NOT HISPANIC OR LATINO	[Not Applicable]	None	Parent	MALE	[Not Available]	[Not Available]|[Not Available]|[Not Available]	[Not Applicable]	Thyroid Papillary Carcinoma - Follicular (>= 99% follicular patterned)	[Not Applicable]	No	[Not Available]	[Not Available]	[Not Available]	[Not Available]	C73	30-mar	C73.9	YES	[Not Available]	[Not Available]	[Not Available]	Bone	Imaging Suspected	pathology of the left and right femur lesions involved by metastasis	2.2	2.8	2.6	[Not Available]	[Not Available]	[Not Available]	[Not Applicable]	M1	N0
4	TCGA-BJ-A0Z3	33	[Not Applicable]	331cae6e-2868-4c58-9302-709a9ff7d025	V600E identified	[Not Applicable]	[Not Applicable]	[Not Applicable]	[Not Applicable]	2011-06-02	-12295	[Not Applicable]	0	182	[Not Applicable]	NOT HISPANIC OR LATINO	[Not Applicable]	None	[Not Available]	FEMALE	YES	[Not Available]|[Not Available]|[Not Available]	[Not Applicable]	Thyroid Papillary Carcinoma - Classical/usual	[Not Applicable]	No	[Not Available]	[Not Available]	[Not Available]	[Not Available]	C73	mar-60	C73.9	YES	3	Ultrasound	YES	[Not Available]	[Not Available]	[Not Available]	1.0	1.3	1.2	[Not Available]	0	[Not Available]	[Not Applicable]	M0	N0
5	TCGA-BJ-A0Z5	58	[Not Applicable]	0fe3b19a-f5e4-497e-92da-32ff6c77b066	V600E identified	[Not Applicable]	[Not Applicable]	[Not Applicable]	[Not Applicable]	2011-04-19	-21368	[Not Applicable]	0	197	[Not Applicable]	NOT HISPANIC OR LATINO	[Not Applicable]	[Not Available]	[Not Available]	MALE	YES	[Not Available]|[Not Available]|[Not Available]	[Not Applicable]	Thyroid Papillary Carcinoma - Classical/usual	[Not Applicable]	No	[Not Available]	[Not Available]	[Not Available]	[Not Available]	C73	mar-60	C73.9	YES	[Not Available]	Ultrasound	[Not Available]	[Not Available]	[Not Available]	[Not Available]	[Not Available]	[Not Available]	[Not Available]	[Not Available]	[Not Available]	[Not Available]	[Not Applicable]	M0	N1a
6	TCGA-BJ-A0Z9	57	[Not Applicable]	86f9eca0-d1ea-4375-a6bc-055e44b3198a	[Not Available]	[Not Applicable]	[Not Applicable]	[Not Applicable]	[Not Applicable]	2011-04-19	-21061	[Not Applicable]	0	251	[Not Applicable]	NOT HISPANIC OR LATINO	[Not Applicable]	Minimal (T3)	[Not Available]	FEMALE	[Not Available]	[Not Available]|[Not Available]|[Not Available]	[Not Applicable]	Thyroid Papillary Carcinoma - Tall Cell (>= 50% tall cell features)	[Not Applicable]	No	[Not Available]	[Not Available]	[Not Available]	[Not Available]	C73	mar-44	C73.9	YES	6	[Not Available]	[Not Available]	[Not Available]	[Not Available]	[Not Available]	1.3	2.8	2.1	[Not Available]	0	[Not Available]	[Not Applicable]	MX	N0
7	TCGA-BJ-A0ZA	67	[Not Applicable]	4c513413-263e-4c7b-b997-7b688c47b698	[Not Available]	[Not Applicable]	[Not Applicable]	[Not Applicable]	[Not Applicable]	2011-04-20	-24528	[Not Applicable]	0	264	[Not Applicable]	NOT HISPANIC OR LATINO	[Not Applicable]	None	[Not Available]	FEMALE	YES	No BRAF Mutation Detected|[Not Available]|No RET/PTC Rearrangement Detected	[Not Applicable]	Thyroid Papillary Carcinoma - Classical/usual	[Not Applicable]	No	[Not Available]	[Not Available]	[Not Available]	[Not Available]	C73	mar-60	C73.9	YES	2	[Not Available]	[Not Available]	[Not Available]	[Not Available]	[Not Available]	1.3	3.4	2	[Not Available]	0	[Not Available]	[Not Applicable]	M0	N0
8	TCGA-BJ-A0ZB	66	[Not Applicable]	dc4d8468-6f34-40cb-a826-8d582cd86fde	V600E	[Not Applicable]	[Not Applicable]	[Not Applicable]	[Not Applicable]	2011-04-21	-24415	[Not Applicable]	0	122	[Not Applicable]	NOT HISPANIC OR LATINO	[Not Applicable]	Moderate/Advanced (T4a)	[Not Available]	MALE	YES	[Not Available]|No RAS Mutation Detected|No RET/PTC Rearrangement Detected	[Not Applicable]	Thyroid Papillary Carcinoma - Classical/usual	[Not Applicable]	No	[Not Available]	[Not Available]	[Not Available]	[Not Available]	C73	mar-60	C73.9	YES	6	Ultrasound	YES	[Not Available]	[Not Available]	[Not Available]	1.2	2.4	1.6	[Not Available]	5	[Not Available]	[Not Applicable]	M0	N1b
9	TCGA-BJ-A0ZC	55	[Not Applicable]	6675c581-297d-44cd-b80f-ae7e53d48228	[Not Available]	[Not Applicable]	[Not Applicable]	[Not Applicable]	[Not Applicable]	2011-04-21	-20281	[Not Applicable]	0	183	[Not Applicable]	NOT HISPANIC OR LATINO	[Not Applicable]	None	[Not Available]	MALE	YES	No BRAF Mutation Detected|No RAS Mutation Detected|No RET/PTC Rearrangement Detected	[Not Applicable]	Thyroid Papillary Carcinoma - Classical/usual	[Not Applicable]	No	[Not Available]	[Not Available]	[Not Available]	[Not Available]	C73	mar-60	C73.9	YES	[Not Available]	Ultrasound	YES	[Not Available]	[Not Available]	[Not Available]	3.0	3.5	3.0	[Not Available]	[Not Available]	[Not Available]	[Not Applicable]	M0	N0
10	TCGA-BJ-A0ZE	63	[Not Applicable]	ab8c9101-adeb-4c43-a8bb-b089ebd711f6	[Not Available]	[Not Applicable]	[Not Applicable]	[Not Applicable]	[Not Applicable]	2011-04-21	-23249	[Not Applicable]	0	237	[Not Applicable]	NOT HISPANIC OR LATINO	[Not Applicable]	Minimal (T3)	[Not Available]	FEMALE	YES	No BRAF Mutation Detected|No RAS Mutation Detected|No RET/PTC Rearrangement Detected	[Not Applicable]	Thyroid Papillary Carcinoma - Classical/usual	[Not Applicable]	No	[Not Available]	[Not Available]	[Not Available]	[Not Available]	C73	mar-60	C73.9	YES	[Not Available]	Ultrasound|CT without contrast	YES	[Not Available]	[Not Available]	[Not Available]	5.0	5.7	5.3	[Not Available]	[Not Available]	[Not Available]	[Not Applicable]	M0	N0
11	TCGA-BJ-A0ZF	54	[Not Applicable]	8beee000-ecab-4a49-9c9d-bb8e677ae199	[Not Available]	[Not Applicable]	[Not Applicable]	[Not Applicable]	[Not Applicable]	2011-04-22	-19978	[Not Applicable]	0	210	[Not Applicable]	NOT HISPANIC OR LATINO	[Not Applicable]	None	[Not Available]	FEMALE	YES	No BRAF Mutation Detected|No RAS Mutation Detected|No RET/PTC Rearrangement Detected	[Not Applicable]	Other specify	Follicular Carcinoma	No	[Not Available]	[Not Available]	[Not Available]	[Not Available]	C73	mar-35	C73.9	YES	[Not Available]	Ultrasound	YES	[Not Available]	[Not Available]	[Not Available]	1.5	2.5	2.0	[Not Available]	[Not Available]	PAX8/PPARg rearrangement identified	[Not Applicable]	M0	N0
12	TCGA-BJ-A0ZG	80	[Not Applicable]	a3810f36-d2b4-4a45-ad08-a4dbfb9d27aa	p. V600E, c.1799T >A	[Not Applicable]	[Not Applicable]	[Not Applicable]	[Not Applicable]	2011-04-22	-29374	[Not Applicable]	0	230	[Not Applicable]	NOT HISPANIC OR LATINO	[Not Applicable]	None	[Not Available]	MALE	YES	[Not Available]|No RAS Mutation Detected|No RET/PTC Rearrangement Detected	[Not Applicable]	Thyroid Papillary Carcinoma - Follicular (>= 99% follicular patterned)	[Not Applicable]	No	[Not Available]	[Not Available]	[Not Available]	[Not Available]	C73	mar-40	C73.9	YES	[Not Available]	Ultrasound|CT without contrast	[Not Available]	[Not Available]	[Not Available]	[Not Available]	1.2	3.7	2.7	[Not Available]	[Not Available]	[Not Available]	[Not Applicable]	M0	N0
13	TCGA-BJ-A0ZH	52	[Not Applicable]	866ca8ad-adc9-45d4-ad92-9f8f1a161ddf	V600E identified	[Not Applicable]	[Not Applicable]	[Not Applicable]	[Not Applicable]	2011-05-02	-19113	[Not Applicable]	0	22	[Not Applicable]	NOT HISPANIC OR LATINO	[Not Applicable]	None	[Not Available]	FEMALE	YES	[Not Available]|[Not Available]|[Not Available]	[Not Applicable]	Thyroid Papillary Carcinoma - Tall Cell (>= 50% tall cell features)	[Not Applicable]	No	[Not Available]	[Not Available]	[Not Available]	[Not Available]	C73	mar-44	C73.9	YES	4	Ultrasound|CT with contrast	YES	[Not Available]	[Not Available]	[Not Available]	2.5	6	4	[Not Available]	1	[Not Available]	[Not Applicable]	MX	N1b
14	TCGA-BJ-A0ZJ	36	[Not Applicable]	8877b479-b62a-4794-b71e-418de96dff23	not identified	[Not Applicable]	[Not Applicable]	[Not Applicable]	[Not Applicable]	2011-05-03	-13149	[Not Applicable]	0	152	[Not Applicable]	NOT HISPANIC OR LATINO	[Not Applicable]	None	[Not Available]	MALE	[Not Available]	[Not Available]|[Not Available]|[Not Available]	[Not Applicable]	Thyroid Papillary Carcinoma - Classical/usual	[Not Applicable]	No	[Not Available]	[Not Available]	[Not Available]	[Not Available]	C73	mar-60	C73.9	YES	8	Ultrasound	[Not Available]	[Not Available]	[Not Available]	[Not Available]	2	4.5	2.5	[Not Available]	1	[Not Available]	[Not Applicable]	M0	N1a
15	TCGA-BJ-A18Y	29	[Not Applicable]	acb3b9db-16e9-40f5-87a9-9df9d4ceee54	not identified	[Not Applicable]	[Not Applicable]	[Not Applicable]	[Not Applicable]	2011-05-04	-10831	[Not Applicable]	0	85	[Not Applicable]	NOT HISPANIC OR LATINO	[Not Applicable]	None	[Not Available]	MALE	YES	[Not Available]|[Not Available]|[Not Available]	[Not Applicable]	Thyroid Papillary Carcinoma - Classical/usual	[Not Applicable]	No	[Not Available]	[Not Available]	[Not Available]	[Not Available]	C73	mar-60	C73.9	YES	5	Ultrasound|CT with contrast	YES	[Not Available]	[Not Available]	[Not Available]	0.7	1.4	1.1	[Not Available]	0	[Not Available]	[Not Applicable]	MX	N0
16	TCGA-BJ-A190	55	[Not Applicable]	04fff86a-b6f5-4900-9e37-c1f0b881b160	not identified	[Not Applicable]	[Not Applicable]	[Not Applicable]	[Not Applicable]	2011-05-09	-20406	[Not Applicable]	0	13	[Not Applicable]	NOT HISPANIC OR LATINO	[Not Applicable]	None	[Not Available]	MALE	YES	[Not Available]|[Not Available]|[Not Available]	[Not Applicable]	Thyroid Papillary Carcinoma - Classical/usual	[Not Applicable]	No	[Not Available]	[Not Available]	[Not Available]	[Not Available]	C73	mar-60	C73.9	YES	1	Ultrasound|MRI without contrast	YES	[Not Available]	[Not Available]	[Not Available]	1.4	3.5	1.6	[Not Available]	0	[Not Available]	[Not Applicable]	MX	N0
17	TCGA-BJ-A191	49	[Not Applicable]	2501ee46-8d38-448b-8765-e9c9706cbbe8	not identified	[Not Applicable]	[Not Applicable]	[Not Applicable]	[Not Applicable]	2011-05-12	-18162	[Not Applicable]	0	146	[Not Applicable]	NOT HISPANIC OR LATINO	[Not Applicable]	None	[Not Available]	FEMALE	YES	[Not Available]|[Not Available]|[Not Available]	[Not Applicable]	Other specify	columnar cell variant	No	[Not Available]	[Not Available]	[Not Available]	[Not Available]	C73	mar-44	C73.9	YES	3	Ultrasound	YES	[Not Available]	[Not Available]	[Not Available]	1.8	2	2	[Not Available]	0	not identified	[Not Applicable]	M0	N0
18	TCGA-BJ-A192	54	[Not Applicable]	b55375c3-9ef2-4d2f-9c29-224e746931c4	not identified	[Not Applicable]	[Not Applicable]	[Not Applicable]	[Not Applicable]	2011-05-27	-19877	[Not Applicable]	0	246	[Not Applicable]	[Not Available]	[Not Applicable]	Minimal (T3)	[Not Available]	FEMALE	[Not Available]	[Not Available]|[Not Available]|[Not Available]	[Not Applicable]	Thyroid Papillary Carcinoma - Classical/usual	[Not Applicable]	No	[Not Available]	[Not Available]	[Not Available]	[Not Available]	C73	mar-90	C73.9	YES	0	Ultrasound	YES	[Not Available]	[Not Available]	[Not Available]	2.5	5.5	3.5	[Not Available]	[Not Available]	[Not Available]	[Not Applicable]	M0	NX
19	TCGA-BJ-A28R	38	[Not Applicable]	524a39ee-8fa3-418e-98a2-a6a90e9c8064	[Not Available]	[Not Applicable]	[Not Applicable]	[Not Applicable]	[Not Applicable]	2011-10-05	-14044	[Not Applicable]	0	148	[Not Applicable]	NOT HISPANIC OR LATINO	[Not Applicable]	[Not Available]	[Not Available]	FEMALE	[Not Available]	[Not Available]|[Not Available]|[Not Available]	[Not Applicable]	Thyroid Papillary Carcinoma - Classical/usual	[Not Applicable]	No	[Not Available]	[Not Available]	[Not Available]	[Not Available]	C73	mar-60	C73.9	YES	17	Ultrasound	YES	[Not Available]	[Not Available]	[Not Available]	0.5	3.0	1.6	[Not Available]	0	[Not Available]	[Not Applicable]	M0	N0
20	TCGA-BJ-A28T	34	[Not Applicable]	a9d8f797-8a53-4be5-b957-0f1f6d080390	[Not Available]	[Not Applicable]	[Not Applicable]	[Not Applicable]	[Not Applicable]	2011-10-05	-12698	[Not Applicable]	0	84	[Not Applicable]	NOT HISPANIC OR LATINO	[Not Applicable]	[Not Available]	[Not Available]	FEMALE	[Not Available]	[Not Available]|[Not Available]|[Not Available]	[Not Applicable]	Thyroid Papillary Carcinoma - Classical/usual	[Not Applicable]	No	[Not Available]	[Not Available]	[Not Available]	[Not Available]	C73	mar-60	C73.9	YES	9	Ultrasound	YES	[Not Available]	[Not Available]	[Not Available]	0.3	1.5	1.0	[Not Available]	3	[Not Available]	[Not Applicable]	M0	N1a
21	TCGA-BJ-A28V	79	[Not Applicable]	BED1FB3C-4459-460E-8190-29211857FA73	[Not Available]	[Not Applicable]	[Not Applicable]	[Not Applicable]	[Not Applicable]	2011-10-05	-29142	[Not Applicable]	0	155	[Not Applicable]	NOT HISPANIC OR LATINO	[Not Applicable]	[Not Available]	[Not Available]	FEMALE	[Not Available]	[Not Available]|[Not Available]|[Not Available]	[Not Applicable]	Thyroid Papillary Carcinoma - Classical/usual	[Not Applicable]	No	[Not Available]	[Not Available]	[Not Available]	[Not Available]	C73	mar-60	C73.9	YES	[Not Available]	[Not Available]	[Not Available]	[Not Available]	[Not Available]	[Not Available]	3.0	5.0	3.5	[Not Available]	[Not Available]	[Not Available]	[Not Applicable]	MX	N0
23	TCGA-BJ-A28X	32	[Not Applicable]	B30F5B13-8CC9-48A0-93EA-3D49CE8A7D0D	[Not Available]	[Not Applicable]	[Not Applicable]	[Not Applicable]	[Not Applicable]	2012-07-03	-11735	[Not Applicable]	0	532	[Not Applicable]	NOT HISPANIC OR LATINO	[Not Applicable]	Minimal (T3)	[Not Available]	FEMALE	NO	[Not Available]|[Not Available]|[Not Available]	[Not Applicable]	Thyroid Papillary Carcinoma - Tall Cell (>= 50% tall cell features)	[Not Applicable]	No	152|152	[Not Available]|[Not Available]	[Not Available]|[Not Available]	[Unknown]|Thyroxine withdrawal	C73	mar-44	C73.9	YES	8	Ultrasound	YES	[Not Available]	[Not Available]	[Not Available]	[Not Available]	[Not Available]	[Not Available]	YES	2	[Not Available]	[Not Applicable]	M0	N1a
24	TCGA-BJ-A28Z	46	[Not Applicable]	6ba76174-620e-4851-857a-d0adbfd6f3e6	[Not Available]	[Not Applicable]	[Not Applicable]	[Not Applicable]	[Not Applicable]	2011-10-05	-16911	[Not Applicable]	0	37	[Not Applicable]	NOT HISPANIC OR LATINO	[Not Applicable]	Minimal (T3)	[Not Available]	FEMALE	YES	No BRAF Mutation Detected|No RAS Mutation Detected|No RET/PTC Rearrangement Detected	[Not Applicable]	Thyroid Papillary Carcinoma - Classical/usual	[Not Applicable]	No	[Not Available]	[Not Available]	[Not Available]	[Not Available]	C73	mar-60	C73.9	YES	16	Ultrasound	YES	[Not Available]	[Not Available]	[Not Available]	0.9	1.7	1.2	[Not Available]	1	[Not Available]	[Not Applicable]	M0	N1a
25	TCGA-BJ-A290	70	[Not Applicable]	3CD2D4BD-8256-42FA-8272-DB379D598007	V600E identified	[Not Applicable]	[Not Applicable]	[Not Applicable]	[Not Applicable]	2011-10-05	-25803	[Not Applicable]	0	626	[Not Applicable]	NOT HISPANIC OR LATINO	[Not Applicable]	Minimal (T3)	[Not Available]	MALE	YES	[Not Available]|[Not Available]|[Not Available]	[Not Applicable]	Thyroid Papillary Carcinoma - Tall Cell (>= 50% tall cell features)	[Not Applicable]	No	[Not Available]	[Not Available]	[Not Available]	[Not Available]	C73	mar-44	C73.9	YES	3	Ultrasound	YES	[Not Available]	[Not Available]	[Not Available]	3.0	4.5	3.5	[Not Available]	3	[Not Available]	[Not Applicable]	M0	N1a
26	TCGA-BJ-A291	56	[Not Applicable]	d4c68c1c-a3f3-4e0c-b555-d457378a1d24	[Not Available]	[Not Applicable]	[Not Applicable]	[Not Applicable]	[Not Applicable]	2011-10-05	-20682	[Not Applicable]	0	441	[Not Applicable]	NOT HISPANIC OR LATINO	[Not Applicable]	[Not Available]	Parent	FEMALE	[Not Available]	[Not Available]|[Not Available]|[Not Available]	[Not Applicable]	Thyroid Papillary Carcinoma - Classical/usual	[Not Applicable]	No	[Not Available]	[Not Available]	[Not Available]	[Not Available]	C73	mar-60	C73.9	YES	9	Ultrasound	YES	[Not Available]	[Not Available]	[Not Available]	1.2	1.5	1.4	[Not Available]	0	[Not Available]	[Not Applicable]	M0	N0
27	TCGA-BJ-A2NA	77	[Not Applicable]	F9D35F8E-ADA4-4CC6-8227-28565EE531D2	[Not Available]	[Not Applicable]	[Not Applicable]	[Not Applicable]	[Not Applicable]	2012-03-27	-28147	[Not Applicable]	0	64	[Not Applicable]	NOT HISPANIC OR LATINO	[Not Applicable]	Minimal (T3)	[Not Available]	MALE	NO	[Not Available]|[Not Available]|[Not Available]	[Not Applicable]	Thyroid Papillary Carcinoma - Classical/usual	[Not Applicable]	No	[Not Available]	[Not Available]	[Not Available]	[Not Available]	C73	mar-60	C73.9	YES	1	Ultrasound	YES	[Not Available]	[Not Available]	[Not Available]	[Not Available]	[Not Available]	[Not Available]	[Not Available]	0	[Not Available]	[Not Applicable]	M0	N0
28	TCGA-BJ-A3PR	69	[Not Applicable]	FD036EC5-3FFB-40B1-8002-943BE0E2532E	[Not Available]	[Not Applicable]	[Not Applicable]	[Not Applicable]	[Not Applicable]	2012-07-02	-25565	[Not Applicable]	0	244	[Not Applicable]	NOT HISPANIC OR LATINO	[Not Applicable]	None	[Not Available]	FEMALE	NO	[Not Available]|[Not Available]|[Not Available]	[Not Applicable]	Thyroid Papillary Carcinoma - Classical/usual	[Not Applicable]	No	[Not Available]|[Not Available]	[Not Available]|[Not Available]	[Not Available]|[Not Available]	[Not Available]|[Not Available]	C73	mar-60	C73.9	YES	6	Ultrasound|CT with contrast	YES	[Not Available]	[Not Available]	[Not Available]	[Not Available]	[Not Available]	[Not Available]	NO	0	[Not Available]	[Not Applicable]	M0	N0
29	TCGA-BJ-A3PT	51	[Not Applicable]	29C4319C-3EAD-42B1-810D-418DA8D515C4	[Not Available]	[Not Applicable]	[Not Applicable]	[Not Applicable]	[Not Applicable]	2012-07-03	-18903	[Not Applicable]	0	367	[Not Applicable]	NOT HISPANIC OR LATINO	[Not Applicable]	[Not Available]	[Not Available]	FEMALE	[Not Available]	[Not Available]|[Not Available]|[Not Available]	[Not Applicable]	Thyroid Papillary Carcinoma - Classical/usual	[Not Applicable]	No	[Not Available]|[Not Available]	[Not Available]|[Not Available]	[Not Available]|[Not Available]	[Not Available]|[Not Available]	C73	mar-60	C73.9	YES	[Not Available]	Ultrasound	YES	[Not Available]	[Not Available]	[Not Available]	[Not Available]	[Not Available]	[Not Available]	NO	[Not Available]	[Not Available]	[Not Applicable]	M0	N0
30	TCGA-BJ-A3PU	52	[Not Applicable]	4CCCC34B-DAF6-41CA-9BF8-F1614525EAC9	[Not Available]	[Not Applicable]	[Not Applicable]	[Not Applicable]	[Not Applicable]	2012-07-03	-19007	[Not Applicable]	0	305	[Not Applicable]	NOT HISPANIC OR LATINO	[Not Applicable]	Minimal (T3)	[Not Available]	MALE	[Not Available]	[Not Available]|[Not Available]|[Not Available]	[Not Applicable]	Thyroid Papillary Carcinoma - Classical/usual	[Not Applicable]	No	[Not Available]|[Not Available]|[Not Available]	[Not Available]|[Not Available]|[Not Available]	[Not Available]|[Not Available]|[Not Available]	[Not Available]|[Not Available]|[Not Available]	C73	mar-60	C73.9	YES	7	Ultrasound	YES	Lung	Imaging Suspected	[Not Available]	1.8	2.6	2	YES	7	[Not Available]	[Not Applicable]	M0	N1a
31	TCGA-BJ-A45C	78	[Not Applicable]	A1196D5F-8C7D-4D9D-9E46-C5C22A9C2FEF	[Not Available]	[Not Applicable]	[Not Applicable]	[Not Applicable]	[Not Applicable]	2013-01-10	-28490	[Not Applicable]	0	174	[Not Applicable]	NOT HISPANIC OR LATINO	[Not Applicable]	Minimal (T3)	[Not Available]	MALE	[Not Available]	[Not Available]|[Not Available]|[Not Available]	[Not Applicable]	Thyroid Papillary Carcinoma - Classical/usual	[Not Applicable]	No	[Not Available]|[Not Available]	[Not Available]|[Not Available]	[Not Available]|[Not Available]	[Not Available]|[Not Available]	C73	mar-60	C73.9	YES	2	Ultrasound|CT with contrast	YES	[Not Available]	[Not Available]	[Not Available]	0.1	1.0	0.2	NO	0	[Not Available]	[Not Applicable]	M0	N0
32	TCGA-BJ-A45D	36	[Not Applicable]	E7CF1CCA-384E-4A00-BB30-BED154EC15C0	[Not Available]	[Not Applicable]	[Not Applicable]	[Not Applicable]	[Not Applicable]	2013-01-10	-13334	[Not Applicable]	0	197	[Not Applicable]	NOT HISPANIC OR LATINO	[Not Applicable]	None	[Not Available]	MALE	[Not Available]	[Not Available]|[Not Available]|[Not Available]	[Not Applicable]	Thyroid Papillary Carcinoma - Follicular (>= 99% follicular patterned)	[Not Applicable]	No	[Not Available]|[Not Available]	[Not Available]|[Not Available]	[Not Available]|[Not Available]	[Not Available]|[Not Available]	C73	mar-40	C73.9	YES	1	Ultrasound	YES	[Not Available]	[Not Available]	[Not Available]	1.3	2.6	1.9	NO	0	[Not Available]	[Not Applicable]	M0	N0
34	TCGA-BJ-A45F	59	[Not Applicable]	DD305533-E48C-4FED-9283-5082703C23FF	Negative	[Not Applicable]	[Not Applicable]	[Not Applicable]	[Not Applicable]	2013-01-15	-21712	[Not Applicable]	0	105	[Not Applicable]	NOT HISPANIC OR LATINO	[Not Applicable]	[Not Available]	[Not Available]	FEMALE	YES	[Not Available]|[Not Available]|[Not Available]	[Not Applicable]	Thyroid Papillary Carcinoma - Classical/usual	[Not Applicable]	No	[Not Available]|[Not Available]	[Not Available]|[Not Available]	[Not Available]|[Not Available]	[Unknown]|[Not Available]	C73	mar-60	C73.9	YES	[Not Available]	Ultrasound	YES	[Not Available]	[Not Available]	[Not Available]	1.5	1.5	1.5	NO	[Not Available]	[Not Available]	[Not Applicable]	M0	N0
35	TCGA-BJ-A45G	48	[Not Applicable]	B8CB385A-4E5F-4932-944D-04D6EA1BBA5A	[Not Available]	[Not Applicable]	[Not Applicable]	[Not Applicable]	[Not Applicable]	2013-01-10	-17831	[Not Applicable]	0	193	[Not Applicable]	NOT HISPANIC OR LATINO	[Not Applicable]	None	[Not Available]	FEMALE	[Not Available]	[Not Available]|[Not Available]|[Not Available]	[Not Applicable]	Thyroid Papillary Carcinoma - Follicular (>= 99% follicular patterned)	[Not Applicable]	No	101|[Not Available]	[Not Available]|[Not Available]	[Not Available]|[Not Available]	Thyroxine withdrawal|[Not Available]	C73	mar-40	C73.9	YES	7	Ultrasound	YES	[Not Available]	[Not Available]	[Not Available]	1.2	2.5	1.6	NO	4	[Not Available]	[Not Applicable]	M0	N1
36	TCGA-BJ-A45H	45	[Not Applicable]	778A8F53-53F6-4A03-8CE1-B0928539A444	600 (pV600E, c1799T>A	[Not Applicable]	[Not Applicable]	[Not Applicable]	[Not Applicable]	2013-01-14	-16541	[Not Applicable]	0	237	[Not Applicable]	NOT HISPANIC OR LATINO	[Not Applicable]	Minimal (T3)	[Not Available]	MALE	YES	[Not Available]|[Not Available]|[Not Available]	[Not Applicable]	Thyroid Papillary Carcinoma - Classical/usual	[Not Applicable]	No	152.1|[Not Available]	[Not Available]|[Not Available]	[Not Available]|[Not Available]	[Not Available]|[Not Available]	C73	mar-60	C73.9	YES	[Not Available]	Ultrasound	YES	[Not Available]	[Not Available]	[Not Available]	1.1	1.5	1.3	NO	[Not Available]	[Not Available]	[Not Applicable]	M0	N0
37	TCGA-BJ-A45I	51	[Not Applicable]	C5D08BE7-B94C-423A-AEA8-BBC635787C63	positive	[Not Applicable]	[Not Applicable]	[Not Applicable]	[Not Applicable]	2013-01-15	-18767	[Not Applicable]	0	187	[Not Applicable]	NOT HISPANIC OR LATINO	[Not Applicable]	Minimal (T3)	[Not Available]	FEMALE	YES	[Not Available]|[Not Available]|[Not Available]	[Not Applicable]	Thyroid Papillary Carcinoma - Tall Cell (>= 50% tall cell features)	[Not Applicable]	No	101.7|[Not Available]	[Not Available]|[Not Available]	[Not Available]|[Not Available]	rhTSH|[Not Available]	C73	mar-44	C73.9	YES	6	Ultrasound	YES	[Not Available]	[Not Available]	[Not Available]	1.1	2.1	1.5	NO	0	[Not Available]	[Not Applicable]	M0	N0
38	TCGA-BJ-A45J	39	[Not Applicable]	6B85D76D-6098-47EA-9823-586238526CF1	V600E	[Not Applicable]	[Not Applicable]	[Not Applicable]	[Not Applicable]	2013-01-15	-14510	[Not Applicable]	0	154	[Not Applicable]	NOT HISPANIC OR LATINO	[Not Applicable]	[Not Available]	[Not Available]	FEMALE	YES	[Not Available]|[Not Available]|[Not Available]	[Not Applicable]	Thyroid Papillary Carcinoma - Tall Cell (>= 50% tall cell features)	[Not Applicable]	No	151|[Not Available]	[Not Available]|[Not Available]	[Not Available]|[Not Available]	rhTSH|[Not Available]	C73	mar-44	C73.9	YES	1	Ultrasound	YES	[Not Available]	[Not Available]	[Not Available]	0.3	0.3	0.3	NO	1	[Not Available]	[Not Applicable]	M0	N1a
39	TCGA-BJ-A45K	33	[Not Applicable]	8CFB88F6-7B37-4F1E-882B-3A368B604167	[Not Available]	[Not Applicable]	[Not Applicable]	[Not Applicable]	[Not Applicable]	2013-01-15	-12137	[Not Applicable]	0	273	[Not Applicable]	NOT HISPANIC OR LATINO	[Not Applicable]	None	[Not Available]	MALE	YES	No BRAF Mutation Detected|No RAS Mutation Detected|No RET/PTC Rearrangement Detected	[Not Applicable]	Thyroid Papillary Carcinoma - Follicular (>= 99% follicular patterned)	[Not Applicable]	No	[Not Available]|[Not Available]	[Not Available]|[Not Available]	[Not Available]|[Not Available]	[Not Available]|[Not Available]	C73	mar-40	C73.9	YES	5	Ultrasound	YES	[Not Available]	[Not Available]	[Not Available]	2.0	2.3	2.2	NO	0	[Not Available]	[Not Applicable]	M0	N0
40	TCGA-BJ-A4O8	47	[Not Applicable]	1009A500-2A37-4AEE-B7C3-049B5CE961A4	(p.V600E, c.1799T>A)	[Not Applicable]	[Not Applicable]	[Not Applicable]	[Not Applicable]	2013-01-28	-17430	[Not Applicable]	0	150	[Not Applicable]	NOT HISPANIC OR LATINO	[Not Applicable]	None	[Not Available]	MALE	[Not Available]	[Not Available]|[Not Available]|[Not Available]	[Not Applicable]	Thyroid Papillary Carcinoma - Classical/usual	[Not Applicable]	No	150|[Not Available]	[Not Available]|[Not Available]	[Not Available]|[Not Available]	Thyroxine withdrawal|[Not Available]	C73	mar-60	C73.9	YES	14	Ultrasound	YES	[Not Available]	[Not Available]	[Not Available]	1.5	1.5	1.5	NO	6	[Not Available]	[Not Applicable]	M0	N1a
41	TCGA-BJ-A4O9	51	[Not Applicable]	CC84500C-0196-450D-87A1-CA394CC227B5	(pV600E, c.1799)	[Not Applicable]	[Not Applicable]	[Not Applicable]	[Not Applicable]	2013-01-28	-18938	[Not Applicable]	0	181	[Not Applicable]	NOT HISPANIC OR LATINO	[Not Applicable]	None	[Not Available]	FEMALE	YES	[Not Available]|[Not Available]|[Not Available]	[Not Applicable]	Other specify	encapsulated follicular	No	[Not Available]|[Not Available]	[Not Available]|[Not Available]	[Not Available]|[Not Available]	[Not Available]|[Not Available]	C73	mar-40	C73.9	YES	8	Ultrasound	YES	[Not Available]	[Not Available]	[Not Available]	3.6	3.6	3.6	NO	0	[Not Available]	[Not Applicable]	M0	N0
42	TCGA-CE-A13K	30	[Not Applicable]	a1227ffa-2733-4a43-ba82-834755453870	[Not Available]	[Not Applicable]	[Not Applicable]	[Not Applicable]	[Not Applicable]	2011-06-16	-11121	[Not Applicable]	0	16	[Not Applicable]	NOT HISPANIC OR LATINO	[Not Applicable]	Minimal (T3)	[Not Available]	FEMALE	[Not Available]	[Not Available]|[Not Available]|[Not Available]	[Not Applicable]	Thyroid Papillary Carcinoma - Classical/usual	[Not Applicable]	No	[Not Available]	[Not Available]	[Not Available]	[Not Available]	C73	mar-60	C73.9	YES	2	[Not Available]	NO	[Not Available]	[Not Available]	[Not Available]	2	4.5	4	[Not Available]	2	[Not Available]	[Not Applicable]	M0	N1
43	TCGA-CE-A27D	28	[Not Applicable]	75a93f0e-cd41-43c6-a303-ff37e31395e9	[Not Available]	[Not Applicable]	[Not Applicable]	[Not Applicable]	[Not Applicable]	2011-07-21	-10536	[Not Applicable]	0	3	[Not Applicable]	NOT HISPANIC OR LATINO	[Not Applicable]	None	[Not Available]	FEMALE	[Not Available]	[Not Available]|[Not Available]|[Not Available]	[Not Applicable]	Thyroid Papillary Carcinoma - Classical/usual	[Not Applicable]	No	[Not Available]	[Not Available]	[Not Available]	[Not Available]	C73	mar-60	C73.9	YES	[Not Available]	[Not Available]	[Not Available]	[Not Available]	[Not Available]	[Not Available]	1.5	3	2	[Not Available]	[Not Available]	[Not Available]	[Not Applicable]	M0	N1
44	TCGA-CE-A3MD	31	[Not Applicable]	16505D78-90D9-47D0-9B86-C6EF91D23AAC	[Not Available]	[Not Applicable]	[Not Applicable]	[Not Applicable]	[Not Applicable]	2012-03-06	-11398	[Not Applicable]	0	6	[Not Applicable]	NOT HISPANIC OR LATINO	[Not Applicable]	None	[Not Available]	MALE	[Not Available]	[Not Available]|[Not Available]|[Not Available]	[Not Applicable]	Thyroid Papillary Carcinoma - Classical/usual	[Not Applicable]	No	[Not Available]	[Not Available]	[Not Available]	[Not Available]	C73	mar-60	C73.9	YES	3	[Not Available]	NO	[Not Available]	[Not Available]	[Not Available]	1	1.5	1	[Not Available]	3	[Not Available]	[Not Applicable]	M0	N1
45	TCGA-CE-A3ME	51	[Not Applicable]	DEC7A0A2-C26E-4A89-A4D5-74BD1409FF91	[Not Available]	[Not Applicable]	[Not Applicable]	[Not Applicable]	[Not Applicable]	2012-03-06	-18713	[Not Applicable]	0	7	[Not Applicable]	NOT HISPANIC OR LATINO	[Not Applicable]	None	[Not Available]	FEMALE	[Not Available]	[Not Available]|[Not Available]|[Not Available]	[Not Applicable]	Thyroid Papillary Carcinoma - Classical/usual	[Not Applicable]	No	[Not Available]	[Not Available]	[Not Available]	[Not Available]	C73	mar-60	C73.9	YES	[Not Available]	[Not Available]	NO	[Not Available]	[Not Available]	[Not Available]	2	4	3	[Not Available]	[Not Available]	[Not Available]	[Not Applicable]	M0	N0
46	TCGA-CE-A481	41	[Not Applicable]	2C9E8686-9757-4E05-8D0E-EFEAA3045D66	[Not Available]	[Not Applicable]	[Not Applicable]	[Not Applicable]	[Not Applicable]	2013-03-07	-15268	[Not Applicable]	0	3	[Not Applicable]	NOT HISPANIC OR LATINO	[Not Applicable]	None	[Not Available]	FEMALE	[Unknown]	[Not Available]|[Not Available]|[Not Available]	[Not Applicable]	Thyroid Papillary Carcinoma - Classical/usual	[Not Applicable]	No	[Not Available]|[Not Available]	[Not Available]|[Not Available]	[Not Available]|[Not Available]	[Not Available]|[Not Available]	C73	mar-60	C73.9	YES	[Not Available]	[Unknown]	[Not Available]	[Not Available]	[Not Available]	[Not Available]	1	1.5	1	NO	[Not Available]	[Not Available]	[Not Applicable]	M0	N0
47	TCGA-CE-A482	27	[Not Applicable]	A5406575-C840-475A-AB1B-E1A159413FBD	[Not Available]	[Not Applicable]	[Not Applicable]	[Not Applicable]	[Not Applicable]	2013-03-07	-10192	[Not Applicable]	0	2	[Not Applicable]	NOT HISPANIC OR LATINO	[Not Applicable]	None	[Not Available]	FEMALE	[Not Available]	[Not Available]|[Not Available]|[Not Available]	[Not Applicable]	Thyroid Papillary Carcinoma - Classical/usual	[Not Applicable]	No	[Not Available]|[Not Available]	[Not Available]|[Not Available]	[Not Available]|[Not Available]	[Not Available]|[Not Available]	C73	mar-60	C73.9	YES	[Not Available]	[Unknown]	NO	[Not Available]	[Not Available]	[Not Available]	1	2	1.5	NO	[Not Available]	[Not Available]	[Not Applicable]	M0	N1
48	TCGA-CE-A483	34	[Not Applicable]	80DA6E75-B7AD-47A6-9923-1E21A519A968	[Not Available]	[Not Applicable]	[Not Applicable]	[Not Applicable]	[Not Applicable]	2013-03-07	-12768	[Not Applicable]	0	3	[Not Applicable]	NOT HISPANIC OR LATINO	[Not Applicable]	None	[Not Available]	FEMALE	[Not Available]	[Not Available]|[Not Available]|[Not Available]	[Not Applicable]	Thyroid Papillary Carcinoma - Classical/usual	[Not Applicable]	No	[Not Available]|[Not Available]	[Not Available]|[Not Available]	[Not Available]|[Not Available]	[Not Available]|[Not Available]	C73	mar-60	C73.9	YES	[Not Available]	[Unknown]	NO	[Not Available]	[Not Available]	[Not Available]	2	4	2	NO	[Not Available]	[Not Available]	[Not Applicable]	M0	N1
49	TCGA-CE-A484	37	[Not Applicable]	E62A728D-390F-428A-BEA1-FC8C9814FB11	[Not Available]	[Not Applicable]	[Not Applicable]	[Not Applicable]	[Not Applicable]	2013-03-07	-13815	[Not Applicable]	0	12	[Not Applicable]	NOT HISPANIC OR LATINO	[Not Applicable]	None	[Not Available]	FEMALE	[Not Available]	[Not Available]|[Not Available]|[Not Available]	[Not Applicable]	Thyroid Papillary Carcinoma - Classical/usual	[Not Applicable]	No	[Not Available]|[Not Available]	[Not Available]|[Not Available]	[Not Available]|[Not Available]	[Not Available]|[Not Available]	C73	mar-60	C73.9	YES	[Not Available]	[Unknown]	[Not Available]	[Not Available]	[Not Available]	[Not Available]	2	5	2	NO	[Not Available]	[Not Available]	[Not Applicable]	M0	N1
50	TCGA-CE-A485	32	[Not Applicable]	9B1DBD0D-BE6D-4A88-881A-FAF57CEBA81C	[Not Available]	[Not Applicable]	[Not Applicable]	[Not Applicable]	[Not Applicable]	2013-03-07	-11997	[Not Applicable]	0	3	[Not Applicable]	NOT HISPANIC OR LATINO	[Not Applicable]	None	[Not Available]	MALE	NO	[Not Available]|[Not Available]|[Not Available]	[Not Applicable]	Thyroid Papillary Carcinoma - Classical/usual	[Not Applicable]	No	[Not Available]|[Not Available]	[Not Available]|[Not Available]	[Not Available]|[Not Available]	[Not Available]|[Not Available]	C73	mar-60	C73.9	YES	[Not Available]	[Unknown]	NO	[Not Available]	[Not Available]	[Not Available]	2	4.5	2.5	NO	[Not Available]	[Not Available]	[Not Applicable]	M0	N1
51	TCGA-DE-A0XZ	65	[Not Applicable]	3E9FDA23-676D-4E78-8948-0C9DF3D10064	[Not Available]	[Not Applicable]	[Not Applicable]	[Not Applicable]	[Not Applicable]	2010-12-15	-24020	[Not Applicable]	0	402	[Not Applicable]	NOT HISPANIC OR LATINO	[Not Applicable]	None	[Not Available]	FEMALE	[Not Available]	[Not Evaluated]|[Not Evaluated]|[Not Evaluated]	[Not Applicable]	Thyroid Papillary Carcinoma - Classical/usual	[Not Applicable]	No	[Not Available]	[Not Available]	[Not Available]	[Not Available]	C73	30-mar	C73.9	YES	7	Ultrasound	YES	[Not Available]	[Not Available]	[Not Available]	1.6	2.0	1.2	[Not Available]	5	[Not Available]	[Not Applicable]	M0	N1a
52	TCGA-DE-A0Y2	30	[Not Applicable]	6ad260ad-769a-4f3c-bd07-927adf6b2338	[Not Available]	[Not Applicable]	[Not Applicable]	[Not Applicable]	[Not Applicable]	2010-12-15	-11227	[Not Applicable]	0	231	[Not Applicable]	NOT HISPANIC OR LATINO	[Not Applicable]	None	[Not Available]	FEMALE	[Not Available]	[Not Evaluated]|[Not Evaluated]|[Not Evaluated]	[Not Applicable]	Thyroid Papillary Carcinoma - Classical/usual	[Not Applicable]	No	[Not Available]	[Not Available]	[Not Available]	[Not Available]	C73	mar-60	C73.9	YES	11	Ultrasound	YES	[Not Available]	[Not Available]	[Not Available]	1.3	2.4	2.2	[Not Available]	6	[Not Available]	[Not Applicable]	M0	N1a
53	TCGA-DE-A0Y3	60	[Not Applicable]	c31b3adf-3fc6-4a72-83b0-bbc0f295b5e7	[Not Available]	[Not Applicable]	[Not Applicable]	[Not Applicable]	[Not Applicable]	2010-12-15	-22239	[Not Applicable]	0	952	[Not Applicable]	NOT HISPANIC OR LATINO	[Not Applicable]	[Not Available]	[Not Available]	FEMALE	[Not Available]	[Not Evaluated]|[Not Evaluated]|[Not Evaluated]	[Not Applicable]	Thyroid Papillary Carcinoma - Classical/usual	[Not Applicable]	No	[Not Available]	[Not Available]	[Not Available]	[Not Available]	C73	mar-60	C73.9	YES	22	Ultrasound	YES	Lung	RAI-avid	[Not Available]	1.2	2.5	1.7	[Not Available]	4	[Not Available]	[Not Applicable]	M1	N1b
54	TCGA-DE-A2OL	44	[Not Applicable]	77BB90F0-E923-4E28-BB88-4D6B420E0B5C	[Not Available]	[Not Applicable]	[Not Applicable]	[Not Applicable]	[Not Applicable]	2011-11-14	-16252	[Not Applicable]	0	161	[Not Applicable]	NOT HISPANIC OR LATINO	[Not Applicable]	None	[Not Available]	FEMALE	NO	[Not Evaluated]|[Not Evaluated]|[Not Evaluated]	[Not Applicable]	Thyroid Papillary Carcinoma - Follicular (>= 99% follicular patterned)	[Not Applicable]	No	[Not Available]	[Not Available]	[Not Available]	[Not Available]	C73	mar-40	C73.9	YES	[Not Available]	[Not Available]	NO	[Not Available]	[Not Available]	[Not Available]	2.7	2.9	2.8	[Not Available]	[Not Available]	[Not Available]	[Not Applicable]	MX	NX
55	TCGA-DE-A3KN	49	[Not Applicable]	085FFCDC-8600-42E2-852A-506465F716A2	[Not Available]	[Not Applicable]	[Not Applicable]	[Not Applicable]	[Not Applicable]	2012-04-19	-18097	[Not Applicable]	0	286	[Not Applicable]	NOT HISPANIC OR LATINO	[Not Applicable]	Minimal (T3)	[Not Available]	FEMALE	NO	[Not Evaluated]|[Not Evaluated]|[Not Evaluated]	[Not Applicable]	Thyroid Papillary Carcinoma - Classical/usual	[Not Applicable]	No	[Not Available]	[Not Available]	[Not Available]	[Not Available]	C73	30-mar	C73.9	YES	9	Ultrasound	YES	[Not Available]	[Not Available]	[Not Available]	2.8	5.2	4.2	[Not Available]	5	[Not Available]	[Not Applicable]	M0	N1b
57	TCGA-DE-A4M9	28	[Not Applicable]	86657A3C-10CF-48B7-9FDA-F2DF5E2AFAD5	[Not Available]	[Not Applicable]	[Not Applicable]	[Not Applicable]	[Not Applicable]	2013-01-17	-10383	[Not Applicable]	0	148	[Not Applicable]	NOT HISPANIC OR LATINO	[Not Applicable]	None	[Not Available]	MALE	[Not Available]	[Not Available]|[Not Available]|[Not Available]	[Not Applicable]	Thyroid Papillary Carcinoma - Classical/usual	[Not Applicable]	No	75 mCi|[Not Available]	[Not Available]|[Not Available]	75 mCi|[Not Available]	Thyroxine withdrawal|[Not Available]	C73	mar-60	C73.9	YES	[Not Available]	CT with contrast	YES	[Not Available]	[Not Available]	[Not Available]	2.0	3.0	2.5	NO	[Not Available]	[Not Available]	[Not Applicable]	M0	NX
60	TCGA-DE-A4MC	43	[Not Applicable]	85DEF63A-39AB-4C83-AB8C-02C6F702F05D	[Not Available]	[Not Applicable]	[Not Applicable]	[Not Applicable]	[Not Applicable]	2013-01-17	-15996	[Not Applicable]	0	529	[Not Applicable]	NOT HISPANIC OR LATINO	[Not Applicable]	Minimal (T3)	[Not Available]	FEMALE	[Not Available]	[Not Available]|[Not Available]|[Not Available]	[Not Applicable]	Thyroid Papillary Carcinoma - Classical/usual	[Not Applicable]	No	150 mCi|200	[Not Available]|[Not Available]	150 mCi|350	Thyroxine withdrawal|Thyroxine withdrawal	C73	mar-60	C73.9	YES	1	CT with contrast	YES	[Not Available]	[Not Available]	[Not Available]	1.7	2.8	1.9	YES	1	[Not Available]	[Not Applicable]	M0	N1b
61	TCGA-DE-A4MD	71	[Not Applicable]	CD0C33C3-4427-471D-979E-79DC43F3A018	[Not Available]	[Not Applicable]	[Not Applicable]	[Not Applicable]	[Not Applicable]	2013-01-17	-26178	[Not Applicable]	0	365	[Not Applicable]	NOT HISPANIC OR LATINO	[Not Applicable]	None	[Not Available]	MALE	[Not Available]	[Not Available]|[Not Available]|[Not Available]	[Not Applicable]	Thyroid Papillary Carcinoma - Classical/usual	[Not Applicable]	No	171 mCi|[Not Available]	[Not Available]|[Not Available]	171 mCi|[Not Available]	Thyroxine withdrawal|Patient did not receive I-131 treatment	C73	mar-60	C73.9	YES	41	CT with contrast	YES	[Not Available]	[Not Available]	[Not Available]	4.5	6.0	5.5	YES	9	[Not Available]	[Not Applicable]	M0	N1b
62	TCGA-DJ-A13M	28	[Not Applicable]	ba9dec81-ffc0-453a-9621-94beba45fab1	[Not Available]	[Not Applicable]	[Not Applicable]	[Not Applicable]	[Not Applicable]	2011-06-24	-10530	[Not Applicable]	0	274	[Not Applicable]	NOT HISPANIC OR LATINO	[Not Applicable]	None	[Not Available]	FEMALE	NO	[Not Evaluated]|[Not Evaluated]|[Not Evaluated]	[Not Applicable]	Thyroid Papillary Carcinoma - Follicular (>= 99% follicular patterned)	[Not Applicable]	No	[Not Available]	[Not Available]	[Not Available]	[Not Available]	C73	mar-40	C73.9	YES	5	Ultrasound	YES	[Not Available]	[Not Available]	[Not Available]	1.4	2.0	2.0	[Not Available]	0	[Not Available]	[Not Applicable]	M0	N0
63	TCGA-DJ-A13O	56	[Not Applicable]	77d5b246-33ba-4a96-9d73-06aca797653e	[Not Available]	[Not Applicable]	[Not Applicable]	[Not Applicable]	[Not Applicable]	2011-06-23	-20788	[Not Applicable]	0	215	[Not Applicable]	NOT HISPANIC OR LATINO	[Not Applicable]	None	[Not Available]	MALE	NO	[Not Evaluated]|[Not Evaluated]|[Not Evaluated]	[Not Applicable]	Thyroid Papillary Carcinoma - Classical/usual	[Not Applicable]	No	[Not Available]	[Not Available]	[Not Available]	[Not Available]	C73	mar-60	C73.9	YES	6	Ultrasound	YES	[Not Available]	[Not Available]	[Not Available]	0.7	1.1	0.8	[Not Available]	0	[Not Available]	[Not Applicable]	M0	N0
64	TCGA-DJ-A13P	52	[Not Applicable]	ca95a11c-b54c-409e-b9a0-da850945033d	[Not Available]	[Not Applicable]	[Not Applicable]	[Not Applicable]	[Not Applicable]	2011-06-24	-19296	[Not Applicable]	0	4199	[Not Applicable]	[Not Available]	[Not Applicable]	Minimal (T3)	[Not Available]	FEMALE	NO	[Not Evaluated]|[Not Evaluated]|[Not Evaluated]	[Not Applicable]	Thyroid Papillary Carcinoma - Classical/usual	[Not Applicable]	No	[Not Available]	[Not Available]	[Not Available]	[Not Available]	C73	mar-40	C73.9	YES	0	[Not Available]	NO	[Not Available]	[Not Available]	[Not Available]	[Not Available]	1.5	[Not Available]	[Not Available]	0	[Not Available]	[Not Applicable]	M0	N0
65	TCGA-DJ-A13R	50	[Not Applicable]	3e787a0e-b5d2-401e-b1e5-077376090b3a	[Not Available]	[Not Applicable]	[Not Applicable]	[Not Applicable]	[Not Applicable]	2011-06-23	-18354	[Not Applicable]	0	92	[Not Applicable]	NOT HISPANIC OR LATINO	[Not Applicable]	None	[Not Available]	MALE	NO	[Not Evaluated]|[Not Evaluated]|[Not Evaluated]	[Not Applicable]	Thyroid Papillary Carcinoma - Follicular (>= 99% follicular patterned)	[Not Applicable]	No	[Not Available]	[Not Available]	[Not Available]	[Not Available]	C73	mar-40	C73.9	YES	2	[Not Available]	NO	[Not Available]	[Not Available]	[Not Available]	4	5	4.5	[Not Available]	0	[Not Available]	[Not Applicable]	M0	N0
66	TCGA-DJ-A13S	19	[Not Applicable]	8aa99f35-c644-4f91-9eff-a5d3fae758b0	[Not Available]	[Not Applicable]	[Not Applicable]	[Not Applicable]	[Not Applicable]	2011-06-24	-7098	[Not Applicable]	0	265	[Not Applicable]	HISPANIC OR LATINO	[Not Applicable]	None	[Not Available]	FEMALE	NO	[Not Evaluated]|[Not Evaluated]|[Not Evaluated]	[Not Applicable]	Thyroid Papillary Carcinoma - Follicular (>= 99% follicular patterned)	[Not Applicable]	No	[Not Available]	[Not Available]	[Not Available]	[Not Available]	C73	mar-40	C73.9	YES	[Not Available]	Ultrasound	YES	[Not Available]	[Not Available]	[Not Available]	1.7	1.8	1.8	[Not Available]	[Not Available]	[Not Available]	[Not Applicable]	M0	N0
67	TCGA-DJ-A13T	37	[Not Applicable]	0b170ed4-d919-466b-b765-47878b865aed	[Not Available]	[Not Applicable]	[Not Applicable]	[Not Applicable]	[Not Applicable]	2011-06-24	-13668	[Not Applicable]	0	758	[Not Applicable]	[Not Available]	[Not Applicable]	None	[Not Available]	FEMALE	NO	[Not Evaluated]|[Not Evaluated]|[Not Evaluated]	[Not Applicable]	Thyroid Papillary Carcinoma - Classical/usual	[Not Applicable]	No	[Not Available]	[Not Available]	[Not Available]	[Not Available]	C73	mar-60	C73.9	YES	7	Ultrasound	YES	[Not Available]	[Not Available]	[Not Available]	[Not Available]	2.2	[Not Available]	[Not Available]	0	[Not Available]	[Not Applicable]	M0	N0
68	TCGA-DJ-A13U	60	[Not Applicable]	8c5aef43-341e-4a37-84eb-fd730eb957c7	[Not Available]	[Not Applicable]	[Not Applicable]	[Not Applicable]	[Not Applicable]	2011-06-23	-22130	[Not Applicable]	0	393	[Not Applicable]	NOT HISPANIC OR LATINO	[Not Applicable]	Minimal (T3)	[Not Available]	MALE	NO	[Not Evaluated]|[Not Evaluated]|[Not Evaluated]	[Not Applicable]	Thyroid Papillary Carcinoma - Classical/usual	[Not Applicable]	No	[Not Available]	[Not Available]	[Not Available]	[Not Available]	C73	mar-60	C73.9	YES	0	Ultrasound	YES	[Not Available]	[Not Available]	[Not Available]	0.7	1.1	0.7	[Not Available]	0	[Not Available]	[Not Applicable]	M0	N0
70	TCGA-DJ-A13W	45	[Not Applicable]	3b48cc5e-3396-4dd5-893d-54b75b98b016	[Not Available]	[Not Applicable]	[Not Applicable]	[Not Applicable]	[Not Applicable]	2011-06-24	-16558	[Not Applicable]	0	454	[Not Applicable]	NOT HISPANIC OR LATINO	[Not Applicable]	None	[Not Available]	FEMALE	NO	[Not Evaluated]|[Not Evaluated]|[Not Evaluated]	[Not Applicable]	Thyroid Papillary Carcinoma - Follicular (>= 99% follicular patterned)	[Not Applicable]	No	[Not Available]	[Not Available]	[Not Available]	[Not Available]	C73	mar-40	C73.9	YES	3	Ultrasound	YES	[Not Available]	[Not Available]	[Not Available]	1.2	2.0	1.4	[Not Available]	0	[Not Available]	[Not Applicable]	M0	N0
71	TCGA-DJ-A13X	51	[Not Applicable]	3b3c99ab-5336-4433-b682-e1a590221611	[Not Available]	[Not Applicable]	[Not Applicable]	[Not Applicable]	[Not Applicable]	2011-06-23	-18689	[Not Applicable]	0	243	[Not Applicable]	NOT HISPANIC OR LATINO	[Not Applicable]	None	[Not Available]	FEMALE	NO	[Not Evaluated]|[Not Evaluated]|[Not Evaluated]	[Not Applicable]	Thyroid Papillary Carcinoma - Follicular (>= 99% follicular patterned)	[Not Applicable]	No	[Not Available]	[Not Available]	[Not Available]	[Not Available]	C73	mar-40	C73.9	YES	1	Ultrasound	YES	[Not Available]	[Not Available]	[Not Available]	4.0	6.5	5.5	[Not Available]	0	[Not Available]	[Not Applicable]	M0	N0
72	TCGA-DJ-A1QD	20	[Not Applicable]	da201150-748e-4b74-bb35-10c995e26079	[Not Available]	[Not Applicable]	[Not Applicable]	[Not Applicable]	[Not Applicable]	2011-07-25	-7457	[Not Applicable]	0	334	[Not Applicable]	NOT HISPANIC OR LATINO	[Not Applicable]	None	[Not Available]	FEMALE	NO	[Not Evaluated]|[Not Evaluated]|[Not Evaluated]	[Not Applicable]	Thyroid Papillary Carcinoma - Classical/usual	[Not Applicable]	No	[Not Available]	[Not Available]	[Not Available]	[Not Available]	C73	mar-60	C73.9	YES	[Not Available]	Ultrasound	YES	[Not Available]	[Not Available]	[Not Available]	1.2	2.2	1.5	[Not Available]	[Not Available]	[Not Available]	[Not Applicable]	M0	N1b
73	TCGA-DJ-A1QE	62	[Not Applicable]	dccba97d-4e81-42fb-93b3-90be68a034fb	[Not Available]	[Not Applicable]	[Not Applicable]	[Not Applicable]	[Not Applicable]	2011-07-25	-22645	[Not Applicable]	0	3041	[Not Applicable]	[Not Available]	[Not Applicable]	Minimal (T3)	[Not Available]	FEMALE	NO	[Not Evaluated]|[Not Evaluated]|[Not Evaluated]	[Not Applicable]	Thyroid Papillary Carcinoma - Classical/usual	[Not Applicable]	No	[Not Available]	[Not Available]	[Not Available]	[Not Available]	C73	mar-60	C73.9	YES	[Not Available]	[Not Available]	NO	[Not Available]	[Not Available]	[Not Available]	1.0	1.5	1.5	[Not Available]	[Not Available]	[Not Available]	[Not Applicable]	M0	N0
74	TCGA-DJ-A1QF	61	[Not Applicable]	fca0c7d9-5e6f-4aa7-ba04-5df2eb8ba398	[Not Available]	[Not Applicable]	[Not Applicable]	[Not Applicable]	[Not Applicable]	2011-07-25	-22309	[Not Applicable]	0	549	[Not Applicable]	[Not Available]	[Not Applicable]	Minimal (T3)	[Not Available]	FEMALE	NO	[Not Evaluated]|[Not Evaluated]|[Not Evaluated]	[Not Applicable]	Thyroid Papillary Carcinoma - Classical/usual	[Not Applicable]	No	[Not Available]	[Not Available]	[Not Available]	[Not Available]	C73	mar-60	C73.9	YES	[Not Available]	Ultrasound	YES	[Not Available]	[Not Available]	[Not Available]	2.5	2.9	2.6	[Not Available]	[Not Available]	[Not Available]	[Not Applicable]	M0	N0
75	TCGA-DJ-A1QG	62	[Not Applicable]	cb29e795-7618-4882-a7e0-69d39787b80c	[Not Available]	[Not Applicable]	[Not Applicable]	[Not Applicable]	[Not Applicable]	2011-07-25	-22858	[Not Applicable]	0	212	[Not Applicable]	NOT HISPANIC OR LATINO	[Not Applicable]	None	[Not Available]	MALE	NO	[Not Evaluated]|[Not Evaluated]|[Not Evaluated]	[Not Applicable]	Thyroid Papillary Carcinoma - Follicular (>= 99% follicular patterned)	[Not Applicable]	No	[Not Available]	[Not Available]	[Not Available]	[Not Available]	C73	mar-40	C73.9	YES	5	Ultrasound	YES	[Not Available]	[Not Available]	[Not Available]	1.5	1.8	1.5	[Not Available]	0	[Not Available]	[Not Applicable]	M0	N0
76	TCGA-DJ-A1QH	58	[Not Applicable]	f3c73dc9-6280-4619-a629-b575fdbdb0ca	[Not Available]	[Not Applicable]	[Not Applicable]	[Not Applicable]	[Not Applicable]	2011-07-25	-21183	[Not Applicable]	0	243	[Not Applicable]	NOT HISPANIC OR LATINO	[Not Applicable]	Minimal (T3)	[Not Available]	FEMALE	NO	[Not Evaluated]|[Not Evaluated]|[Not Evaluated]	[Not Applicable]	Thyroid Papillary Carcinoma - Tall Cell (>= 50% tall cell features)	[Not Applicable]	Yes	[Not Available]	[Not Available]	[Not Available]	[Not Available]	C73	mar-44	C73.9	YES	8	Ultrasound	YES	[Not Available]	[Not Available]	[Not Available]	2.0	2.5	2.0	[Not Available]	7	[Not Available]	[Not Applicable]	M0	N1a
77	TCGA-DJ-A1QI	63	[Not Applicable]	3b1e2bd6-3d32-40f7-9b32-0df32dfcbc72	[Not Available]	[Not Applicable]	[Not Applicable]	[Not Applicable]	[Not Applicable]	2011-07-25	-23072	[Not Applicable]	0	151	[Not Applicable]	NOT HISPANIC OR LATINO	[Not Applicable]	None	[Not Available]	FEMALE	NO	[Not Evaluated]|[Not Evaluated]|[Not Evaluated]	[Not Applicable]	Thyroid Papillary Carcinoma - Classical/usual	[Not Applicable]	No	[Not Available]	[Not Available]	[Not Available]	[Not Available]	C73	mar-60	C73.9	YES	[Not Available]	Ultrasound	YES	[Not Available]	[Not Available]	[Not Available]	2.5	3.0	2.5	[Not Available]	[Not Available]	[Not Available]	[Not Applicable]	M0	N0
78	TCGA-DJ-A1QL	70	[Not Applicable]	e4b08e66-0772-4956-8670-e5c6553eecbe	[Not Available]	[Not Applicable]	[Not Applicable]	[Not Applicable]	[Not Applicable]	2011-07-25	-25720	[Not Applicable]	0	212	[Not Applicable]	NOT HISPANIC OR LATINO	[Not Applicable]	None	[Not Available]	MALE	NO	[Not Evaluated]|[Not Evaluated]|[Not Evaluated]	[Not Applicable]	Thyroid Papillary Carcinoma - Follicular (>= 99% follicular patterned)	[Not Applicable]	No	[Not Available]	[Not Available]	[Not Available]	[Not Available]	C73	mar-40	C73.9	YES	[Not Available]	Ultrasound	YES	[Not Available]	[Not Available]	[Not Available]	1.8	2.1	1.8	[Not Available]	[Not Available]	[Not Available]	[Not Applicable]	M0	N0
79	TCGA-DJ-A1QM	42	[Not Applicable]	3597af5e-65ff-40a7-95fc-dacc26cbca14	[Not Available]	[Not Applicable]	[Not Applicable]	[Not Applicable]	[Not Applicable]	2011-07-25	-15432	[Not Applicable]	0	30	[Not Applicable]	NOT HISPANIC OR LATINO	[Not Applicable]	None	[Not Available]	MALE	NO	[Not Evaluated]|[Not Evaluated]|[Not Evaluated]	[Not Applicable]	Thyroid Papillary Carcinoma - Follicular (>= 99% follicular patterned)	[Not Applicable]	No	[Not Available]	[Not Available]	[Not Available]	[Not Available]	C73	mar-40	C73.9	YES	2	Ultrasound	YES	[Not Available]	[Not Available]	[Not Available]	0.5	0.7	0.6	[Not Available]	0	[Not Available]	[Not Applicable]	M0	N0
80	TCGA-DJ-A1QN	42	[Not Applicable]	2012869d-c169-4cea-aa09-c892fb79bbaa	[Not Available]	[Not Applicable]	[Not Applicable]	[Not Applicable]	[Not Applicable]	2011-07-25	-15340	[Not Applicable]	0	273	[Not Applicable]	NOT HISPANIC OR LATINO	[Not Applicable]	None	[Not Available]	FEMALE	NO	[Not Evaluated]|[Not Evaluated]|[Not Evaluated]	[Not Applicable]	Thyroid Papillary Carcinoma - Classical/usual	[Not Applicable]	No	[Not Available]	[Not Available]	[Not Available]	[Not Available]	C73	mar-60	C73.9	YES	[Not Available]	Ultrasound	YES	[Not Available]	[Not Available]	[Not Available]	0.7	0.1	0.2	[Not Available]	[Not Available]	[Not Available]	[Not Applicable]	M0	N0
81	TCGA-DJ-A1QO	69	[Not Applicable]	f2ad720e-579f-4e2c-a3f0-17877ca91067	[Not Available]	[Not Applicable]	[Not Applicable]	[Not Applicable]	[Not Applicable]	2011-07-25	-25232	[Not Applicable]	0	31	[Not Applicable]	NOT HISPANIC OR LATINO	[Not Applicable]	Minimal (T3)	[Not Available]	MALE	NO	[Not Evaluated]|[Not Evaluated]|[Not Evaluated]	[Not Applicable]	Thyroid Papillary Carcinoma - Tall Cell (>= 50% tall cell features)	[Not Applicable]	No	[Not Available]	[Not Available]	[Not Available]	[Not Available]	C73	mar-44	C73.9	YES	[Not Available]	[Not Available]	NO	[Not Available]	[Not Available]	[Not Available]	1.1	2.2	1.8	[Not Available]	[Not Available]	[Not Available]	[Not Applicable]	M0	N0
82	TCGA-DJ-A1QQ	43	[Not Applicable]	99ef2fec-5a3c-4e42-8f78-7eaf9877e26d	[Not Available]	[Not Applicable]	[Not Applicable]	[Not Applicable]	[Not Applicable]	2011-07-25	-15948	[Not Applicable]	0	181	[Not Applicable]	NOT HISPANIC OR LATINO	[Not Applicable]	Minimal (T3)	[Not Available]	MALE	NO	[Not Evaluated]|[Not Evaluated]|[Not Evaluated]	[Not Applicable]	Thyroid Papillary Carcinoma - Classical/usual	[Not Applicable]	No	[Not Available]	[Not Available]	[Not Available]	[Not Available]	C73	mar-60	C73.9	YES	[Not Available]	Ultrasound	YES	[Not Available]	[Not Available]	[Not Available]	2.0	3.0	2.2	[Not Available]	[Not Available]	[Not Available]	[Not Applicable]	M0	N0
83	TCGA-DJ-A2PN	70	[Not Applicable]	FB39F29A-5D1E-4F96-8ADB-E18CC87FAD2E	[Not Available]	[Not Applicable]	[Not Applicable]	[Not Applicable]	[Not Applicable]	2012-01-23	-25689	[Not Applicable]	0	304	[Not Applicable]	NOT HISPANIC OR LATINO	[Not Applicable]	None	[Not Available]	FEMALE	NO	[Not Evaluated]|[Not Evaluated]|[Not Evaluated]	[Not Applicable]	Thyroid Papillary Carcinoma - Classical/usual	[Not Applicable]	No	[Not Available]	[Not Available]	[Not Available]	[Not Available]	C73	mar-60	C73.9	YES	[Not Available]	[Not Available]	YES	[Not Available]	[Not Available]	[Not Available]	1.0	1.3	1.2	[Not Available]	[Not Available]	[Not Available]	[Not Applicable]	M0	N0
84	TCGA-DJ-A2PO	54	[Not Applicable]	D60F6620-575D-47FE-83E8-80A6AD838BED	[Not Available]	[Not Applicable]	[Not Applicable]	[Not Applicable]	[Not Applicable]	2012-01-23	-20058	[Not Applicable]	0	242	[Not Applicable]	NOT HISPANIC OR LATINO	[Not Applicable]	None	[Not Available]	MALE	NO	[Not Evaluated]|[Not Evaluated]|[Not Evaluated]	[Not Applicable]	Thyroid Papillary Carcinoma - Classical/usual	[Not Applicable]	No	[Not Available]	[Not Available]	[Not Available]	[Not Available]	C73	mar-60	C73.9	YES	4	Ultrasound	YES	[Not Available]	[Not Available]	[Not Available]	0.6	0.6	0.6	[Not Available]	0	[Not Available]	[Not Applicable]	M0	N0
85	TCGA-DJ-A2PP	47	[Not Applicable]	05350770-2B5B-4C58-84CE-0917665CCB90	[Not Available]	[Not Applicable]	[Not Applicable]	[Not Applicable]	[Not Applicable]	2012-01-23	-17410	[Not Applicable]	0	152	[Not Applicable]	NOT HISPANIC OR LATINO	[Not Applicable]	None	[Not Available]	MALE	NO	[Not Evaluated]|[Not Evaluated]|[Not Evaluated]	[Not Applicable]	Thyroid Papillary Carcinoma - Follicular (>= 99% follicular patterned)	[Not Applicable]	No	[Not Available]	[Not Available]	[Not Available]	[Not Available]	C73	mar-40	C73.9	YES	3	Ultrasound	YES	[Not Available]	[Not Available]	[Not Available]	2.5	3.6	2.6	[Not Available]	0	[Not Available]	[Not Applicable]	M0	N0
86	TCGA-DJ-A2PQ	26	[Not Applicable]	EDB90376-0EF9-47DD-BE6F-A6E8A0380A9C	[Not Available]	[Not Applicable]	[Not Applicable]	[Not Applicable]	[Not Applicable]	2012-01-26	-9649	[Not Applicable]	0	623	[Not Applicable]	NOT HISPANIC OR LATINO	[Not Applicable]	None	[Not Available]	MALE	NO	[Not Evaluated]|[Not Evaluated]|[Not Evaluated]	[Not Applicable]	Thyroid Papillary Carcinoma - Classical/usual	[Not Applicable]	No	[Not Available]	[Not Available]	[Not Available]	[Not Available]	C73	mar-60	C73.9	YES	12	Ultrasound	YES	[Not Available]	[Not Available]	[Not Available]	1.5	3.5	2.0	[Not Available]	7	[Not Available]	[Not Applicable]	M0	N1a
87	TCGA-DJ-A2PR	27	[Not Applicable]	2CE580E9-4D75-464C-B403-C9F4626D7AA4	[Not Available]	[Not Applicable]	[Not Applicable]	[Not Applicable]	[Not Applicable]	2012-01-26	-9921	[Not Applicable]	0	318	[Not Applicable]	NOT HISPANIC OR LATINO	[Not Applicable]	Minimal (T3)	[Not Available]	MALE	NO	[Not Evaluated]|[Not Evaluated]|[Not Evaluated]	[Not Applicable]	Thyroid Papillary Carcinoma - Classical/usual	[Not Applicable]	No	[Not Available]	[Not Available]	[Not Available]	[Not Available]	C73	mar-60	C73.9	YES	12	Ultrasound	YES	[Not Available]	[Not Available]	[Not Available]	1.6	2.0	1.8	[Not Available]	6	[Not Available]	[Not Applicable]	M0	N1a
88	TCGA-DJ-A2PS	40	[Not Applicable]	9F31DEB9-B9F4-439B-AEA4-F87C71406C79	[Not Available]	[Not Applicable]	[Not Applicable]	[Not Applicable]	[Not Applicable]	2012-01-26	-14916	[Not Applicable]	0	59	[Not Applicable]	NOT HISPANIC OR LATINO	[Not Applicable]	Minimal (T3)	[Not Available]	FEMALE	NO	[Not Evaluated]|[Not Evaluated]|[Not Evaluated]	[Not Applicable]	Thyroid Papillary Carcinoma - Classical/usual	[Not Applicable]	No	[Not Available]	[Not Available]	[Not Available]	[Not Available]	C73	mar-60	C73.9	YES	4	Ultrasound	YES	[Not Available]	[Not Available]	[Not Available]	0.7	1.1	0.8	[Not Available]	1	[Not Available]	[Not Applicable]	M0	N1a
89	TCGA-DJ-A2PT	70	[Not Applicable]	39E68907-3FFB-4CA1-A955-DB5FA2F0DEB1	[Not Available]	[Not Applicable]	[Not Applicable]	[Not Applicable]	[Not Applicable]	2012-01-26	-25843	[Not Applicable]	0	292	[Not Applicable]	HISPANIC OR LATINO	[Not Applicable]	Minimal (T3)	Sibling	FEMALE	NO	[Not Evaluated]|[Not Evaluated]|[Not Evaluated]	[Not Applicable]	Thyroid Papillary Carcinoma - Tall Cell (>= 50% tall cell features)	[Not Applicable]	No	[Not Available]	[Not Available]	[Not Available]	[Not Available]	C73	mar-60	C73.9	YES	15	Ultrasound	YES	[Not Available]	[Not Available]	[Not Available]	1.0	1.5	1.2	[Not Available]	0	[Not Available]	[Not Applicable]	M0	N0
90	TCGA-DJ-A2PU	52	[Not Applicable]	13577A2B-EE68-45E5-96A8-B1FD71FC62DA	[Not Available]	[Not Applicable]	[Not Applicable]	[Not Applicable]	[Not Applicable]	2012-01-26	-18993	[Not Applicable]	0	312	[Not Applicable]	NOT HISPANIC OR LATINO	[Not Applicable]	None	[Not Available]	FEMALE	NO	[Not Evaluated]|[Not Evaluated]|[Not Evaluated]	[Not Applicable]	Thyroid Papillary Carcinoma - Classical/usual	[Not Applicable]	No	[Not Available]	[Not Available]	[Not Available]	[Not Available]	C73	mar-60	C73.9	YES	1	Ultrasound	YES	[Not Available]	[Not Available]	[Not Available]	2.2	2.8	2.5	[Not Available]	0	[Not Available]	[Not Applicable]	M0	N0
91	TCGA-DJ-A2PV	53	[Not Applicable]	63076BDA-61A1-4403-A270-4130B5D003EE	[Not Available]	[Not Applicable]	[Not Applicable]	[Not Applicable]	[Not Applicable]	2012-01-26	-19542	[Not Applicable]	0	242	[Not Applicable]	NOT HISPANIC OR LATINO	[Not Applicable]	None	Parent	FEMALE	NO	[Not Evaluated]|[Not Evaluated]|[Not Evaluated]	[Not Applicable]	Thyroid Papillary Carcinoma - Classical/usual	[Not Applicable]	No	[Not Available]	[Not Available]	[Not Available]	[Not Available]	C73	mar-60	C73.9	YES	7	Ultrasound	YES	[Not Available]	[Not Available]	[Not Available]	1.7	3.4	3.0	[Not Available]	0	[Not Available]	[Not Applicable]	M0	N0
92	TCGA-DJ-A2PW	65	[Not Applicable]	D487536F-0521-4D42-9150-6A806AE00241	[Not Available]	[Not Applicable]	[Not Applicable]	[Not Applicable]	[Not Applicable]	2012-01-26	-23984	[Not Applicable]	0	234	[Not Applicable]	NOT HISPANIC OR LATINO	[Not Applicable]	None	[Not Available]	MALE	NO	[Not Evaluated]|[Not Evaluated]|[Not Evaluated]	[Not Applicable]	Thyroid Papillary Carcinoma - Classical/usual	[Not Applicable]	No	[Not Available]	[Not Available]	[Not Available]	[Not Available]	C73	mar-60	C73.9	YES	1	Ultrasound	YES	[Not Available]	[Not Available]	[Not Available]	2.6	4.6	2.9	[Not Available]	1	[Not Available]	[Not Applicable]	M0	N1a
93	TCGA-DJ-A2PX	55	[Not Applicable]	A175A9A5-AB86-4C68-9814-C30CFCC52662	[Not Available]	[Not Applicable]	[Not Applicable]	[Not Applicable]	[Not Applicable]	2012-01-26	-20087	[Not Applicable]	0	153	[Not Applicable]	NOT HISPANIC OR LATINO	[Not Applicable]	None	[Not Available]	FEMALE	NO	[Not Evaluated]|[Not Evaluated]|[Not Evaluated]	[Not Applicable]	Thyroid Papillary Carcinoma - Follicular (>= 99% follicular patterned)	[Not Applicable]	No	[Not Available]	[Not Available]	[Not Available]	[Not Available]	C73	mar-40	C73.9	YES	4	Ultrasound	YES	[Not Available]	[Not Available]	[Not Available]	[Not Available]	1.2	[Not Available]	[Not Available]	0	[Not Available]	[Not Applicable]	M0	N0
94	TCGA-DJ-A2PY	46	[Not Applicable]	FD25E4E6-F017-4C07-B109-D8A5EEA8763C	[Not Available]	[Not Applicable]	[Not Applicable]	[Not Applicable]	[Not Applicable]	2012-01-26	-17044	[Not Applicable]	0	267	[Not Applicable]	NOT HISPANIC OR LATINO	[Not Applicable]	Minimal (T3)	[Not Available]	FEMALE	NO	[Not Evaluated]|[Not Evaluated]|[Not Evaluated]	[Not Applicable]	Thyroid Papillary Carcinoma - Tall Cell (>= 50% tall cell features)	[Not Applicable]	No	[Not Available]	[Not Available]	[Not Available]	[Not Available]	C73	mar-44	C73.9	YES	2	Ultrasound	YES	[Not Available]	[Not Available]	[Not Available]	1.2	2.5	1.5	[Not Available]	1	[Not Available]	[Not Applicable]	M0	N1a
95	TCGA-DJ-A2PZ	63	[Not Applicable]	5DCBDFCF-8A4D-4DA5-9049-F2B970FE8CA8	[Not Available]	[Not Applicable]	[Not Applicable]	[Not Applicable]	[Not Applicable]	2012-01-30	-23346	[Not Applicable]	0	256	[Not Applicable]	NOT HISPANIC OR LATINO	[Not Applicable]	Minimal (T3)	[Not Available]	MALE	NO	[Not Evaluated]|[Not Evaluated]|[Not Evaluated]	[Not Applicable]	Thyroid Papillary Carcinoma - Classical/usual	[Not Applicable]	No	[Not Available]	[Not Available]	[Not Available]	[Not Available]	C73	mar-60	C73.9	YES	1	Ultrasound	YES	[Not Available]	[Not Available]	[Not Available]	1.2	1.7	1.6	[Not Available]	0	[Not Available]	[Not Applicable]	M0	N0
96	TCGA-DJ-A2Q0	57	[Not Applicable]	8BEA483B-AC43-4265-B2C4-0F031E539008	[Not Available]	[Not Applicable]	[Not Applicable]	[Not Applicable]	[Not Applicable]	2012-02-20	-20969	[Not Applicable]	0	247	[Not Applicable]	NOT HISPANIC OR LATINO	[Not Applicable]	None	[Not Available]	FEMALE	NO	[Not Evaluated]|[Not Evaluated]|[Not Evaluated]	[Not Applicable]	Thyroid Papillary Carcinoma - Classical/usual	[Not Applicable]	No	[Not Available]	[Not Available]	[Not Available]	[Not Available]	C73	mar-60	C73.9	YES	4	Ultrasound	YES	[Not Available]	[Not Available]	[Not Available]	1.5	2.8	2.6	[Not Available]	0	[Not Available]	[Not Applicable]	M0	N0
97	TCGA-DJ-A2Q1	44	[Not Applicable]	E35B2928-8784-45D0-A71A-A2DF161542FA	[Not Available]	[Not Applicable]	[Not Applicable]	[Not Applicable]	[Not Applicable]	2012-01-30	-16375	[Not Applicable]	0	284	[Not Applicable]	NOT HISPANIC OR LATINO	[Not Applicable]	None	[Not Available]	FEMALE	NO	[Not Evaluated]|[Not Evaluated]|[Not Evaluated]	[Not Applicable]	Thyroid Papillary Carcinoma - Classical/usual	[Not Applicable]	No	[Not Available]	[Not Available]	[Not Available]	[Not Available]	C73	mar-60	C73.9	YES	44	Ultrasound	YES	[Not Available]	[Not Available]	[Not Available]	1.0	1.6	1.6	[Not Available]	11	[Not Available]	[Not Applicable]	M0	N1b
98	TCGA-DJ-A2Q2	57	[Not Applicable]	A00DA907-E527-45F9-9AFB-2FAD2C7B0940	[Not Available]	[Not Applicable]	[Not Applicable]	[Not Applicable]	[Not Applicable]	2012-01-30	-20939	[Not Applicable]	0	206	[Not Applicable]	NOT HISPANIC OR LATINO	[Not Applicable]	None	[Not Available]	FEMALE	NO	[Not Evaluated]|[Not Evaluated]|[Not Evaluated]	[Not Applicable]	Thyroid Papillary Carcinoma - Follicular (>= 99% follicular patterned)	[Not Applicable]	No	[Not Available]	[Not Available]	[Not Available]	[Not Available]	C73	mar-40	C73.9	YES	1	Ultrasound	YES	[Not Available]	[Not Available]	[Not Available]	2.0	4.9	3.5	[Not Available]	0	[Not Available]	[Not Applicable]	M0	N0
99	TCGA-DJ-A2Q3	62	[Not Applicable]	ACBA8D76-999A-4F6D-B3A4-8D7DD0F2BB52	[Not Available]	[Not Applicable]	[Not Applicable]	[Not Applicable]	[Not Applicable]	2012-01-30	-22644	[Not Applicable]	0	280	[Not Applicable]	NOT HISPANIC OR LATINO	[Not Applicable]	Minimal (T3)	[Not Available]	FEMALE	NO	[Not Evaluated]|[Not Evaluated]|[Not Evaluated]	[Not Applicable]	Thyroid Papillary Carcinoma - Tall Cell (>= 50% tall cell features)	[Not Applicable]	No	[Not Available]	[Not Available]	[Not Available]	[Not Available]	C73	mar-44	C73.9	YES	6	Ultrasound	YES	[Not Available]	[Not Available]	[Not Available]	0.6	0.8	0.7	[Not Available]	1	[Not Available]	[Not Applicable]	M0	N1a
100	TCGA-DJ-A2Q4	53	[Not Applicable]	F00FD40A-1254-4300-BAF9-88528C453A2E	[Not Available]	[Not Applicable]	[Not Applicable]	[Not Applicable]	[Not Applicable]	2012-01-30	-19693	[Not Applicable]	0	287	[Not Applicable]	NOT HISPANIC OR LATINO	[Not Applicable]	None	[Not Available]	MALE	NO	[Not Evaluated]|[Not Evaluated]|[Not Evaluated]	[Not Applicable]	Thyroid Papillary Carcinoma - Classical/usual	[Not Applicable]	No	[Not Available]	[Not Available]	[Not Available]	[Not Available]	C73	mar-60	C73.9	YES	10	Ultrasound	YES	[Not Available]	[Not Available]	[Not Available]	0.8	1.3	0.8	[Not Available]	1	[Not Available]	[Not Applicable]	M0	N1a
101	TCGA-DJ-A2Q5	51	[Not Applicable]	13C97CFB-EEA2-4AE8-9209-C967D9642CEF	[Not Available]	[Not Applicable]	[Not Applicable]	[Not Applicable]	[Not Applicable]	2012-02-20	-18718	[Not Applicable]	0	301	[Not Applicable]	NOT HISPANIC OR LATINO	[Not Applicable]	None	[Not Available]	MALE	NO	[Not Evaluated]|[Not Evaluated]|[Not Evaluated]	[Not Applicable]	Thyroid Papillary Carcinoma - Classical/usual	[Not Applicable]	No	[Not Available]	[Not Available]	[Not Available]	[Not Available]	C73	mar-60	C73.9	YES	5	Ultrasound	YES	[Not Available]	[Not Available]	[Not Available]	2.5	4.0	2.7	[Not Available]	2	[Not Available]	[Not Applicable]	M0	N1b
102	TCGA-DJ-A2Q6	38	[Not Applicable]	AF546062-0960-41F0-9ED1-6ACECBAD99F3	[Not Available]	[Not Applicable]	[Not Applicable]	[Not Applicable]	[Not Applicable]	2012-02-20	-14183	[Not Applicable]	0	262	[Not Applicable]	NOT HISPANIC OR LATINO	[Not Applicable]	Minimal (T3)	[Not Available]	FEMALE	NO	[Not Evaluated]|[Not Evaluated]|[Not Evaluated]	[Not Applicable]	Thyroid Papillary Carcinoma - Classical/usual	[Not Applicable]	No	[Not Available]	[Not Available]	[Not Available]	[Not Available]	C73	mar-60	C73.9	YES	45	Ultrasound	YES	[Not Available]	[Not Available]	[Not Available]	0.8	1.1	0.8	[Not Available]	22	[Not Available]	[Not Applicable]	M0	N1b
103	TCGA-DJ-A2Q7	52	[Not Applicable]	7A9B57C9-6F80-4AEA-BF9C-76407C8084BE	[Not Available]	[Not Applicable]	[Not Applicable]	[Not Applicable]	[Not Applicable]	2012-02-20	-19205	[Not Applicable]	0	291	[Not Applicable]	NOT HISPANIC OR LATINO	[Not Applicable]	Minimal (T3)	[Not Available]	FEMALE	NO	[Not Evaluated]|[Not Evaluated]|[Not Evaluated]	[Not Applicable]	Thyroid Papillary Carcinoma - Classical/usual	[Not Applicable]	No	[Not Available]	[Not Available]	[Not Available]	[Not Available]	C73	mar-60	C73.9	YES	5	Ultrasound	YES	[Not Available]	[Not Available]	[Not Available]	2.2	2.5	2.3	[Not Available]	3	[Not Available]	[Not Applicable]	M0	N1a
105	TCGA-DJ-A2Q9	65	[Not Applicable]	061FAB24-727A-4551-A205-89EEB9F530EA	[Not Available]	[Not Applicable]	[Not Applicable]	[Not Applicable]	[Not Applicable]	2012-02-20	-23956	[Not Applicable]	0	315	[Not Applicable]	NOT HISPANIC OR LATINO	[Not Applicable]	None	[Not Available]	FEMALE	NO	[Not Evaluated]|[Not Evaluated]|[Not Evaluated]	[Not Applicable]	Thyroid Papillary Carcinoma - Tall Cell (>= 50% tall cell features)	[Not Applicable]	No	[Not Available]	[Not Available]	[Not Available]	[Not Available]	C73	mar-44	C73.9	YES	5	Ultrasound	YES	[Not Available]	[Not Available]	[Not Available]	1.2	1.5	1.3	[Not Available]	1	[Not Available]	[Not Applicable]	M0	N1a
106	TCGA-DJ-A2QA	56	[Not Applicable]	B07435D4-1341-4B41-9B11-D13A4F1CA0AD	[Not Available]	[Not Applicable]	[Not Applicable]	[Not Applicable]	[Not Applicable]	2012-02-20	-20788	[Not Applicable]	0	378	[Not Applicable]	NOT HISPANIC OR LATINO	[Not Applicable]	Minimal (T3)	[Not Available]	FEMALE	NO	[Not Evaluated]|[Not Evaluated]|[Not Evaluated]	[Not Applicable]	Thyroid Papillary Carcinoma - Follicular (>= 99% follicular patterned)	[Not Applicable]	No	[Not Available]	[Not Available]	[Not Available]	[Not Available]	C73	mar-40	C73.9	YES	1	Ultrasound	YES	[Not Available]	[Not Available]	[Not Available]	0.6	1.3	0.7	[Not Available]	0	[Not Available]	[Not Applicable]	M0	N0
107	TCGA-DJ-A2QB	53	[Not Applicable]	B597023C-FF84-44CC-BFCC-8BEE64CA4CFF	[Not Available]	[Not Applicable]	[Not Applicable]	[Not Applicable]	[Not Applicable]	2012-02-20	-19601	[Not Applicable]	0	330	[Not Applicable]	NOT HISPANIC OR LATINO	[Not Applicable]	Minimal (T3)	[Not Available]	FEMALE	NO	[Not Evaluated]|[Not Evaluated]|[Not Evaluated]	[Not Applicable]	Thyroid Papillary Carcinoma - Follicular (>= 99% follicular patterned)	[Not Applicable]	No	[Not Available]	[Not Available]	[Not Available]	[Not Available]	C73	mar-40	C73.9	YES	54	Ultrasound	YES	[Not Available]	[Not Available]	[Not Available]	[Not Available]	1.6	[Not Available]	[Not Available]	5	[Not Available]	[Not Applicable]	M0	N1b
108	TCGA-DJ-A2QC	70	[Not Applicable]	1F094DB9-F8CC-4066-ADFF-609682936172	[Not Available]	[Not Applicable]	[Not Applicable]	[Not Applicable]	[Not Applicable]	2012-02-20	-25689	[Not Applicable]	0	304	[Not Applicable]	NOT HISPANIC OR LATINO	[Not Applicable]	None	[Not Available]	FEMALE	NO	[Not Evaluated]|[Not Evaluated]|[Not Evaluated]	[Not Applicable]	Thyroid Papillary Carcinoma - Classical/usual	[Not Applicable]	No	[Not Available]	[Not Available]	[Not Available]	[Not Available]	C73	mar-60	C73.9	YES	[Not Available]	Ultrasound	YES	[Not Available]	[Not Available]	[Not Available]	2.0	2.3	2.1	[Not Available]	[Not Available]	[Not Available]	[Not Applicable]	M0	N0
109	TCGA-DJ-A3UK	35	[Not Applicable]	D61CA744-ADC4-44D5-AD15-CC17399E8083	[Not Available]	[Not Applicable]	[Not Applicable]	[Not Applicable]	[Not Applicable]	2012-08-13	-13145	[Not Applicable]	0	251	[Not Applicable]	NOT HISPANIC OR LATINO	[Not Applicable]	None	[Not Available]	FEMALE	NO	[Not Evaluated]|[Not Evaluated]|[Not Evaluated]	[Not Applicable]	Thyroid Papillary Carcinoma - Classical/usual	[Not Applicable]	No	[Not Available]|[Not Available]	[Not Available]|[Not Available]	[Not Available]|[Not Available]	Patient did not receive I-131 treatment|[Not Available]	C73	mar-60	C73.9	YES	3	Ultrasound	YES	[Not Available]	[Not Available]	[Not Available]	1	1.5	1	NO	0	[Not Available]	[Not Applicable]	M0	N0
110	TCGA-DJ-A3UM	45	[Not Applicable]	D579370B-8AA7-4472-9E28-43C761BE3EDA	[Not Available]	[Not Applicable]	[Not Applicable]	[Not Applicable]	[Not Applicable]	2012-08-13	-16573	[Not Applicable]	0	524	[Not Applicable]	NOT HISPANIC OR LATINO	[Not Applicable]	None	[Not Available]	FEMALE	NO	[Not Evaluated]|[Not Evaluated]|[Not Evaluated]	[Not Applicable]	Thyroid Papillary Carcinoma - Classical/usual	[Not Applicable]	No	[Not Available]|[Not Available]	[Not Available]|[Not Available]	[Not Available]|[Not Available]	Patient did not receive I-131 treatment|[Not Available]	C73	mar-60	C73.9	YES	3	[Not Available]	NO	[Not Available]	[Not Available]	[Not Available]	0.8	1.3	0.9	NO	0	[Not Available]	[Not Applicable]	M0	N0
111	TCGA-DJ-A3UN	51	[Not Applicable]	69F621C8-DE77-48C7-8939-4C887DA9E6D8	[Not Available]	[Not Applicable]	[Not Applicable]	[Not Applicable]	[Not Applicable]	2012-08-13	-18870	[Not Applicable]	0	380	[Not Applicable]	NOT HISPANIC OR LATINO	[Not Applicable]	None	[Not Available]	FEMALE	NO	[Not Evaluated]|[Not Evaluated]|[Not Evaluated]	[Not Applicable]	Thyroid Papillary Carcinoma - Classical/usual	[Not Applicable]	No	[Not Available]|[Not Available]	[Not Available]|[Not Available]	[Not Available]|[Not Available]	Patient did not receive I-131 treatment|[Not Available]	C73	mar-60	C73.9	YES	3	Ultrasound	YES	[Not Available]	[Not Available]	[Not Available]	0.9	1.0	1.0	NO	0	[Not Available]	[Not Applicable]	M0	N0
112	TCGA-DJ-A3UO	63	[Not Applicable]	D78012B6-24F9-48F5-9409-9845D0BE2B3C	[Not Available]	[Not Applicable]	[Not Applicable]	[Not Applicable]	[Not Applicable]	2012-08-13	-23292	[Not Applicable]	0	480	[Not Applicable]	NOT HISPANIC OR LATINO	[Not Applicable]	Minimal (T3)	[Not Available]	MALE	NO	[Not Evaluated]|[Not Evaluated]|[Not Evaluated]	[Not Applicable]	Thyroid Papillary Carcinoma - Classical/usual	[Not Applicable]	No	148.6 mCi|[Not Available]	[Not Available]|[Not Available]	148.6 mCi|[Not Available]	rhTSH|[Not Available]	C73	mar-60	C73.9	YES	25	Ultrasound	YES	[Not Available]	[Not Available]	[Not Available]	1.0	2.8	1.8	NO	6	[Not Available]	[Not Applicable]	M0	N1b
113	TCGA-DJ-A3UP	38	[Not Applicable]	2610485E-F2B2-45F7-A578-99D6983D5F0E	[Not Available]	[Not Applicable]	[Not Applicable]	[Not Applicable]	[Not Applicable]	2012-08-13	-13899	[Not Applicable]	0	167	[Not Applicable]	HISPANIC OR LATINO	[Not Applicable]	None	[Not Available]	FEMALE	NO	[Not Evaluated]|[Not Evaluated]|[Not Evaluated]	[Not Applicable]	Thyroid Papillary Carcinoma - Follicular (>= 99% follicular patterned)	[Not Applicable]	No	29.47 mCi|[Not Available]	[Not Available]|[Not Available]	29.47 mCi|[Not Available]	rhTSH|[Not Available]	C73	mar-40	C73.9	YES	24	Ultrasound	YES	[Not Available]	[Not Available]	[Not Available]	1.8	2.1	1.9	NO	0	[Not Available]	[Not Applicable]	M0	N0
114	TCGA-DJ-A3UQ	45	[Not Applicable]	368689A0-F782-4826-9F08-CF0E0055162E	[Not Available]	[Not Applicable]	[Not Applicable]	[Not Applicable]	[Not Applicable]	2012-08-13	-16545	[Not Applicable]	0	277	[Not Applicable]	NOT HISPANIC OR LATINO	[Not Applicable]	Minimal (T3)	[Not Available]	FEMALE	NO	[Not Evaluated]|[Not Evaluated]|[Not Evaluated]	[Not Applicable]	Thyroid Papillary Carcinoma - Tall Cell (>= 50% tall cell features)	[Not Applicable]	No	97.8 mCi|[Not Available]	[Not Available]|[Not Available]	97.8 mCi|[Not Available]	rhTSH|[Not Available]	C73	mar-44	C73.9	YES	6	Ultrasound	YES	[Not Available]	[Not Available]	[Not Available]	0.6	0.7	0.6	NO	5	[Not Available]	[Not Applicable]	M0	N1a
115	TCGA-DJ-A3UR	51	[Not Applicable]	C5FD200B-CE02-4D7D-A240-78F147E483BE	[Not Available]	[Not Applicable]	[Not Applicable]	[Not Applicable]	[Not Applicable]	2012-08-13	-18807	[Not Applicable]	0	721	[Not Applicable]	NOT HISPANIC OR LATINO	[Not Applicable]	Minimal (T3)	[Not Available]	FEMALE	NO	[Not Evaluated]|[Not Evaluated]|[Not Evaluated]	[Not Applicable]	Thyroid Papillary Carcinoma - Follicular (>= 99% follicular patterned)	[Not Applicable]	No	[Not Available]|[Not Available]	[Not Available]|[Not Available]	[Not Available]|[Not Available]	Patient did not receive I-131 treatment|[Not Available]	C73	mar-40	C73.9	YES	7	Ultrasound	YES	[Not Available]	[Not Available]	[Not Available]	0.8	1.0	0.8	NO	4	[Not Available]	[Not Applicable]	M0	N1a
116	TCGA-DJ-A3US	37	[Not Applicable]	6EE95DC8-2BAC-4691-AFA2-8222E07506AD	[Not Available]	[Not Applicable]	[Not Applicable]	[Not Applicable]	[Not Applicable]	2012-08-13	-13634	[Not Applicable]	0	630	[Not Applicable]	NOT HISPANIC OR LATINO	[Not Applicable]	None	[Not Available]	FEMALE	NO	[Not Evaluated]|[Not Evaluated]|[Not Evaluated]	[Not Applicable]	Thyroid Papillary Carcinoma - Classical/usual	[Not Applicable]	No	[Not Available]|[Not Available]	[Not Available]|[Not Available]	[Not Available]|[Not Available]	Patient did not receive I-131 treatment|[Not Available]	C73	mar-60	C73.9	YES	[Not Available]	Ultrasound	YES	[Not Available]	[Not Available]	[Not Available]	1.2	1.5	1.2	NO	[Not Available]	[Not Available]	[Not Applicable]	M0	N0
117	TCGA-DJ-A3UT	43	[Not Applicable]	9D3F6163-F586-4974-BABC-67B5163B706B	[Not Available]	[Not Applicable]	[Not Applicable]	[Not Applicable]	[Not Applicable]	2012-08-13	-15767	[Not Applicable]	0	469	[Not Applicable]	HISPANIC OR LATINO	[Not Applicable]	None	[Not Available]	FEMALE	[Not Available]	[Not Evaluated]|[Not Evaluated]|[Not Evaluated]	[Not Applicable]	Thyroid Papillary Carcinoma - Follicular (>= 99% follicular patterned)	[Not Applicable]	No	[Not Available]|[Not Available]	[Not Available]|[Not Available]	[Not Available]|[Not Available]	Patient did not receive I-131 treatment|[Not Available]	C73	mar-40	C73.9	YES	[Not Available]	Ultrasound	YES	[Not Available]	[Not Available]	[Not Available]	0.7	0.9	0.8	NO	[Not Available]	[Not Available]	[Not Applicable]	M0	N0
118	TCGA-DJ-A3UU	49	[Not Applicable]	45EEFBA8-9F7C-49E9-A3F5-D13CFA264FF6	[Not Available]	[Not Applicable]	[Not Applicable]	[Not Applicable]	[Not Applicable]	2012-08-13	-17919	[Not Applicable]	0	538	[Not Applicable]	NOT HISPANIC OR LATINO	[Not Applicable]	Minimal (T3)	[Not Available]	FEMALE	[Not Available]	[Not Evaluated]|[Not Evaluated]|[Not Evaluated]	[Not Applicable]	Thyroid Papillary Carcinoma - Classical/usual	[Not Applicable]	No	163mCi|[Not Available]	143.4 mCi|[Not Available]	306.4 mCi|[Not Available]	rhTSH|[Not Available]	C73	mar-60	C73.9	YES	2	Ultrasound	YES	[Not Available]	[Not Available]	[Not Available]	1.0	1.1	1.0	NO	0	[Not Available]	[Not Applicable]	M0	N0
119	TCGA-DJ-A3UV	18	[Not Applicable]	F2BBB5FA-9997-45DE-88D4-8F1E94C18F0D	[Not Available]	[Not Applicable]	[Not Applicable]	[Not Applicable]	[Not Applicable]	2012-08-13	-6850	[Not Applicable]	0	590	[Not Applicable]	NOT HISPANIC OR LATINO	[Not Applicable]	None	[Not Available]	FEMALE	[Not Available]	[Not Evaluated]|[Not Evaluated]|[Not Evaluated]	[Not Applicable]	Thyroid Papillary Carcinoma - Classical/usual	[Not Applicable]	No	[Not Available]|[Not Available]	[Not Available]|[Not Available]	[Not Available]|[Not Available]	Patient did not receive I-131 treatment|[Not Available]	C73	mar-60	C73.9	YES	2	Ultrasound	YES	[Not Available]	[Not Available]	[Not Available]	0.6	0.8	0.6	NO	0	[Not Available]	[Not Applicable]	M0	N0
120	TCGA-DJ-A3UW	50	[Not Applicable]	5E085199-152A-40F5-A8F8-3A3A0F31C2E0	[Not Available]	[Not Applicable]	[Not Applicable]	[Not Applicable]	[Not Applicable]	2012-08-13	-18486	[Not Applicable]	0	1308	[Not Applicable]	NOT HISPANIC OR LATINO	[Not Applicable]	None	[Not Available]	FEMALE	[Not Available]	[Not Evaluated]|[Not Evaluated]|[Not Evaluated]	[Not Applicable]	Thyroid Papillary Carcinoma - Classical/usual	[Not Applicable]	No	[Not Available]|[Not Available]	[Not Available]|[Not Available]	[Not Available]|[Not Available]	Patient did not receive I-131 treatment|[Not Available]	C73	mar-60	C73.9	YES	4	[Not Available]	NO	[Not Available]	[Not Available]	[Not Available]	0.5	1.2	0.7	NO	0	[Not Available]	[Not Applicable]	M0	N0
121	TCGA-DJ-A3UX	46	[Not Applicable]	A3765A2B-FF09-4DEC-B990-65529345214E	V600E mutation detected	[Not Applicable]	[Not Applicable]	[Not Applicable]	[Not Applicable]	2012-08-13	-17123	[Not Applicable]	0	345	[Not Applicable]	NOT HISPANIC OR LATINO	[Not Applicable]	None	[Not Available]	FEMALE	YES	[Not Available]|[Not Evaluated]|[Not Evaluated]	[Not Applicable]	Thyroid Papillary Carcinoma - Classical/usual	[Not Applicable]	No	[Not Available]|[Not Available]	[Not Available]|[Not Available]	[Not Available]|[Not Available]	Patient did not receive I-131 treatment|[Not Available]	C73	mar-60	C73.9	YES	3	Ultrasound	YES	[Not Available]	[Not Available]	[Not Available]	0.3	0.5	0.4	NO	0	[Not Available]	[Not Applicable]	M0	N0
122	TCGA-DJ-A3UY	32	[Not Applicable]	02A8E937-C747-4BA1-911C-0860E62B8F83	[Not Available]	[Not Applicable]	[Not Applicable]	[Not Applicable]	[Not Applicable]	2012-08-13	-12004	[Not Applicable]	0	405	[Not Applicable]	NOT HISPANIC OR LATINO	[Not Applicable]	None	[Not Available]	FEMALE	NO	[Not Evaluated]|[Not Evaluated]|[Not Evaluated]	[Not Applicable]	Thyroid Papillary Carcinoma - Classical/usual	[Not Applicable]	No	[Not Available]|[Not Available]	[Not Available]|[Not Available]	[Not Available]|[Not Available]	Patient did not receive I-131 treatment|[Not Available]	C73	mar-60	C73.9	YES	[Not Available]	Ultrasound	YES	[Not Available]	[Not Available]	[Not Available]	0.6	1.2	0.7	NO	[Not Available]	[Not Available]	[Not Applicable]	M0	N0
123	TCGA-DJ-A3UZ	70	[Not Applicable]	AB0A98AE-98F1-425E-9418-550DF6AC24CD	[Not Available]	[Not Applicable]	[Not Applicable]	[Not Applicable]	[Not Applicable]	2012-08-13	-25846	[Not Applicable]	0	388	[Not Applicable]	NOT HISPANIC OR LATINO	[Not Applicable]	Minimal (T3)	Parent	FEMALE	NO	[Not Evaluated]|[Not Evaluated]|[Not Evaluated]	[Not Applicable]	Thyroid Papillary Carcinoma - Classical/usual	[Not Applicable]	No	[Not Available]|[Not Available]	[Not Available]|[Not Available]	[Not Available]|[Not Available]	Patient did not receive I-131 treatment|[Not Available]	C73	mar-60	C73.9	YES	3	Ultrasound	YES	[Not Available]	[Not Available]	[Not Available]	[Not Available]	0.8	[Not Available]	NO	0	[Not Available]	[Not Applicable]	M0	N0
124	TCGA-DJ-A3V0	56	[Not Applicable]	B82E08E3-AE79-404A-A501-0D501DF84B8B	[Not Available]	[Not Applicable]	[Not Applicable]	[Not Applicable]	[Not Applicable]	2012-08-13	-20496	[Not Applicable]	0	761	[Not Applicable]	NOT HISPANIC OR LATINO	[Not Applicable]	Moderate/Advanced (T4a)	Sibling	MALE	NO	[Not Evaluated]|[Not Evaluated]|[Not Evaluated]	[Not Applicable]	Thyroid Papillary Carcinoma - Tall Cell (>= 50% tall cell features)	[Not Applicable]	No	150 mCi|[Not Available]	[Not Available]|[Not Available]	150 mCi|[Not Available]	rhTSH|[Not Available]	C73	mar-44	C73.9	YES	49	Ultrasound|CT with contrast	YES	[Not Available]	[Not Available]	[Not Available]	0.8	1.8	1.0	NO	13	[Not Available]	[Not Applicable]	M0	N1b
125	TCGA-DJ-A3V2	44	[Not Applicable]	7B46EE87-E976-41BF-BDF1-9BFF58F8314E	[Not Available]	[Not Applicable]	[Not Applicable]	[Not Applicable]	[Not Applicable]	2012-08-21	-16382	[Not Applicable]	0	225	[Not Applicable]	NOT HISPANIC OR LATINO	[Not Applicable]	None	[Not Available]	FEMALE	NO	[Not Evaluated]|[Not Evaluated]|[Not Evaluated]	[Not Applicable]	Thyroid Papillary Carcinoma - Classical/usual	[Not Applicable]	No	[Not Available]|[Not Available]	[Not Available]|[Not Available]	[Not Available]|[Not Available]	Patient did not receive I-131 treatment|[Not Available]	C73	mar-60	C73.9	YES	4	Ultrasound	YES	[Not Available]	[Not Available]	[Not Available]	1.9	2.1	2.1	NO	1	[Not Available]	[Not Applicable]	M0	N1a
126	TCGA-DJ-A3V3	57	[Not Applicable]	6592A7DB-CBC7-4AFD-9FDB-5CC16C16EECA	[Not Available]	[Not Applicable]	[Not Applicable]	[Not Applicable]	[Not Applicable]	2012-08-21	-20997	[Not Applicable]	0	540	[Not Applicable]	NOT HISPANIC OR LATINO	[Not Applicable]	None	[Not Available]	FEMALE	NO	[Not Evaluated]|[Not Evaluated]|[Not Evaluated]	[Not Applicable]	Thyroid Papillary Carcinoma - Classical/usual	[Not Applicable]	No	[Not Available]|[Not Available]	[Not Available]|[Not Available]	[Not Available]|[Not Available]	Patient did not receive I-131 treatment|[Not Available]	C73	mar-60	C73.9	YES	15	[Not Available]	NO	[Not Available]	[Not Available]	[Not Available]	1.3	2.4	1.8	NO	0	[Not Available]	[Not Applicable]	M0	N0
127	TCGA-DJ-A3V4	60	[Not Applicable]	35277C30-010C-4D3F-9DFE-754BF72799D7	[Not Available]	[Not Applicable]	[Not Applicable]	[Not Applicable]	[Not Applicable]	2012-08-21	-22218	[Not Applicable]	0	443	[Not Applicable]	NOT HISPANIC OR LATINO	[Not Applicable]	Minimal (T3)	[Not Available]	FEMALE	NO	[Not Evaluated]|[Not Evaluated]|[Not Evaluated]	[Not Applicable]	Thyroid Papillary Carcinoma - Tall Cell (>= 50% tall cell features)	[Not Applicable]	No	95.4 mCi|[Not Available]	[Not Available]|[Not Available]	95.4 mCi|[Not Available]	rhTSH|[Not Available]	C73	mar-44	C73.9	YES	1	Ultrasound	YES	[Not Available]	[Not Available]	[Not Available]	0.8	1.3	1.3	NO	1	[Not Available]	[Not Applicable]	M0	N1a
128	TCGA-DJ-A3V5	76	[Not Applicable]	7B82E2D2-47F9-41A1-9ECA-40904C92039C	[Not Available]	[Not Applicable]	[Not Applicable]	[Not Applicable]	[Not Applicable]	2012-08-21	-27917	[Not Applicable]	0	239	[Not Applicable]	NOT HISPANIC OR LATINO	[Not Applicable]	Minimal (T3)	[Not Available]	FEMALE	NO	[Not Evaluated]|[Not Evaluated]|[Not Evaluated]	[Not Applicable]	Thyroid Papillary Carcinoma - Tall Cell (>= 50% tall cell features)	[Not Applicable]	No	[Not Available]|[Not Available]	[Not Available]|[Not Available]	[Not Available]|[Not Available]	rhTSH|[Not Available]	C73	mar-44	C73.9	YES	1	Ultrasound	YES	[Not Available]	[Not Available]	[Not Available]	1.1	1.4	1.2	NO	0	[Not Available]	[Not Applicable]	M0	N0
129	TCGA-DJ-A3V6	54	[Not Applicable]	76C4D298-6F17-4F11-A706-CD844A0E0914	[Not Available]	[Not Applicable]	[Not Applicable]	[Not Applicable]	[Not Applicable]	2012-08-21	-19870	[Not Applicable]	0	454	[Not Applicable]	NOT HISPANIC OR LATINO	[Not Applicable]	Minimal (T3)	[Not Available]	MALE	NO	[Not Evaluated]|[Not Evaluated]|[Not Evaluated]	[Not Applicable]	Thyroid Papillary Carcinoma - Tall Cell (>= 50% tall cell features)	[Not Applicable]	Yes	119.8 mCi|[Not Available]	[Not Available]|[Not Available]	119.8 mCi|[Not Available]	rhTSH|[Not Available]	C73	mar-44	C73.9	YES	[Not Available]	CT with contrast	YES	[Not Available]	[Not Available]	[Not Available]	1.0	1.8	1.2	NO	[Not Available]	[Not Available]	[Not Applicable]	M0	N0
130	TCGA-DJ-A3V7	44	[Not Applicable]	8E9C3621-BC43-40D0-BB2D-0C8B7ADE37C2	[Not Available]	[Not Applicable]	[Not Applicable]	[Not Applicable]	[Not Applicable]	2012-08-21	-16256	[Not Applicable]	0	299	[Not Applicable]	NOT HISPANIC OR LATINO	[Not Applicable]	Minimal (T3)	[Not Available]	FEMALE	NO	[Not Evaluated]|[Not Evaluated]|[Not Evaluated]	[Not Applicable]	Thyroid Papillary Carcinoma - Tall Cell (>= 50% tall cell features)	[Not Applicable]	No	99.8 mCi|[Not Available]	[Not Available]|[Not Available]	99.8 mCi|[Not Available]	rhTSH|[Not Available]	C73	mar-44	C73.9	YES	2	Ultrasound	YES	[Not Available]	[Not Available]	[Not Available]	1.5	2.2	1.8	NO	0	[Not Available]	[Not Applicable]	M0	N0
131	TCGA-DJ-A3V8	28	[Not Applicable]	A3B49C90-FA9F-4189-A442-64EC1AD97A01	[Not Available]	[Not Applicable]	[Not Applicable]	[Not Applicable]	[Not Applicable]	2012-08-21	-10397	[Not Applicable]	0	259	[Not Applicable]	NOT HISPANIC OR LATINO	[Not Applicable]	Minimal (T3)	[Not Available]	FEMALE	NO	[Not Evaluated]|[Not Evaluated]|[Not Evaluated]	[Not Applicable]	Thyroid Papillary Carcinoma - Tall Cell (>= 50% tall cell features)	[Not Applicable]	No	102.8 mCi|[Not Available]	[Not Available]|[Not Available]	102.8 mCi|[Not Available]	rhTSH|[Not Available]	C73	mar-44	C73.9	YES	16	Ultrasound	YES	[Not Available]	[Not Available]	[Not Available]	1.0	2.5	1.4	NO	8	[Not Available]	[Not Applicable]	M0	N1b
132	TCGA-DJ-A3V9	50	[Not Applicable]	2DCDF9A1-9437-4515-88C1-1C17D6B6418C	[Not Available]	[Not Applicable]	[Not Applicable]	[Not Applicable]	[Not Applicable]	2012-08-21	-18399	[Not Applicable]	0	217	[Not Applicable]	NOT HISPANIC OR LATINO	[Not Applicable]	None	[Not Available]	FEMALE	NO	[Not Evaluated]|[Not Evaluated]|[Not Evaluated]	[Not Applicable]	Thyroid Papillary Carcinoma - Classical/usual	[Not Applicable]	No	153.2|[Not Available]	[Not Available]|[Not Available]	153.2|[Not Available]	rhTSH|[Not Available]	C73	mar-60	C73.9	YES	56	Ultrasound	YES	[Not Available]	[Not Available]	[Not Available]	[Not Available]	2.3	[Not Available]	NO	12	[Not Available]	[Not Applicable]	M0	N1b
133	TCGA-DJ-A3VA	39	[Not Applicable]	28AEF3AE-5375-4139-9B4E-5569EB394C88	[Not Available]	[Not Applicable]	[Not Applicable]	[Not Applicable]	[Not Applicable]	2012-08-21	-14495	[Not Applicable]	0	363	[Not Applicable]	NOT HISPANIC OR LATINO	[Not Applicable]	None	[Not Available]	FEMALE	NO	[Not Evaluated]|[Not Evaluated]|[Not Evaluated]	[Not Applicable]	Thyroid Papillary Carcinoma - Classical/usual	[Not Applicable]	No	[Not Available]|[Not Available]	[Not Available]|[Not Available]	[Not Available]|[Not Available]	Patient did not receive I-131 treatment|[Not Available]	C73	mar-60	C73.9	YES	28	CT with contrast	YES	[Not Available]	[Not Available]	[Not Available]	1.5	2.0	1.8	NO	1	[Not Available]	[Not Applicable]	M0	N1a
134	TCGA-DJ-A3VB	52	[Not Applicable]	B305B716-5AE5-421B-B3C9-0824D37B08A8	[Not Available]	[Not Applicable]	[Not Applicable]	[Not Applicable]	[Not Applicable]	2012-08-21	-19248	[Not Applicable]	0	341	[Not Applicable]	NOT HISPANIC OR LATINO	[Not Applicable]	Minimal (T3)	[Not Available]	MALE	NO	[Not Evaluated]|[Not Evaluated]|[Not Evaluated]	[Not Applicable]	Thyroid Papillary Carcinoma - Tall Cell (>= 50% tall cell features)	[Not Applicable]	No	149.7|[Not Available]	[Not Available]|[Not Available]	149.7|[Not Available]	rhTSH|[Not Available]	C73	mar-44	C73.9	YES	1	Ultrasound|CT with contrast	YES	[Not Available]	[Not Available]	[Not Available]	2.0	5.5	3.5	NO	1	[Not Available]	[Not Applicable]	M0	N1a
135	TCGA-DJ-A3VD	32	[Not Applicable]	DC659941-8D12-4095-8D8A-1769878C363C	[Not Available]	[Not Applicable]	[Not Applicable]	[Not Applicable]	[Not Applicable]	2012-08-21	-12019	[Not Applicable]	0	350	[Not Applicable]	HISPANIC OR LATINO	[Not Applicable]	None	[Not Available]	FEMALE	NO	[Not Evaluated]|[Not Evaluated]|[Not Evaluated]	[Not Applicable]	Thyroid Papillary Carcinoma - Classical/usual	[Not Applicable]	No	124.1 mCi|[Not Available]	[Not Available]|[Not Available]	124.1 mCi|[Not Available]	rhTSH|[Not Available]	C73	mar-60	C73.9	YES	14	Ultrasound	YES	[Not Available]	[Not Available]	[Not Available]	0.6	1.2	0.8	NO	6	[Not Available]	[Not Applicable]	M0	N1a
136	TCGA-DJ-A3VE	50	[Not Applicable]	E071C940-60FA-4C73-BB65-1AD670021854	[Not Available]	[Not Applicable]	[Not Applicable]	[Not Applicable]	[Not Applicable]	2012-08-21	-18417	[Not Applicable]	0	134	[Not Applicable]	NOT HISPANIC OR LATINO	[Not Applicable]	None	[Not Available]	MALE	NO	[Not Evaluated]|[Not Evaluated]|[Not Evaluated]	[Not Applicable]	Thyroid Papillary Carcinoma - Classical/usual	[Not Applicable]	No	[Not Available]|[Not Available]	[Not Available]|[Not Available]	[Not Available]|[Not Available]	Patient did not receive I-131 treatment|[Not Available]	C73	mar-60	C73.9	YES	[Not Available]	CT with contrast|CT without contrast	YES	[Not Available]	[Not Available]	[Not Available]	1.3	1.7	1.6	NO	[Not Available]	[Not Available]	[Not Applicable]	M0	N0
137	TCGA-DJ-A3VF	60	[Not Applicable]	A7030D2B-2CC0-46BE-9721-DC210954BEE0	[Not Available]	[Not Applicable]	[Not Applicable]	[Not Applicable]	[Not Applicable]	2012-08-21	-22234	[Not Applicable]	0	235	[Not Applicable]	NOT HISPANIC OR LATINO	[Not Applicable]	Minimal (T3)	[Not Available]	FEMALE	NO	[Not Evaluated]|[Not Evaluated]|[Not Evaluated]	[Not Applicable]	Thyroid Papillary Carcinoma - Tall Cell (>= 50% tall cell features)	[Not Applicable]	No	122.1 mCi|[Not Available]	[Not Available]|[Not Available]	122.1 mCi|[Not Available]	rhTSH|[Not Available]	C73	mar-44	C73.9	YES	12	Ultrasound	YES	[Not Available]	[Not Available]	[Not Available]	0.7	1.0	0.8	NO	4	[Not Available]	[Not Applicable]	M0	N1b
138	TCGA-DJ-A3VG	40	[Not Applicable]	C042A639-63C6-471B-A7C5-3FB4E12C4D12	[Not Available]	[Not Applicable]	[Not Applicable]	[Not Applicable]	[Not Applicable]	2012-08-21	-14970	[Not Applicable]	0	253	[Not Applicable]	NOT HISPANIC OR LATINO	[Not Applicable]	None	[Not Available]	MALE	NO	[Not Evaluated]|[Not Evaluated]|[Not Evaluated]	[Not Applicable]	Thyroid Papillary Carcinoma - Follicular (>= 99% follicular patterned)	[Not Applicable]	No	[Not Available]|[Not Available]	[Not Available]|[Not Available]	[Not Available]|[Not Available]	Patient did not receive I-131 treatment|[Not Available]	C73	mar-40	C73.9	YES	1	[Not Available]	NO	[Not Available]	[Not Available]	[Not Available]	0.6	1.1	0.8	NO	0	[Not Available]	[Not Applicable]	M0	N0
139	TCGA-DJ-A3VJ	22	[Not Applicable]	E62ADAC4-803A-4D94-9AE0-7B1A49041799	[Not Available]	[Not Applicable]	[Not Applicable]	[Not Applicable]	[Not Applicable]	2012-08-21	-8340	[Not Applicable]	0	528	[Not Applicable]	NOT HISPANIC OR LATINO	[Not Applicable]	Minimal (T3)	[Not Available]	MALE	NO	[Not Evaluated]|[Not Evaluated]|[Not Evaluated]	[Not Applicable]	Other specify	Papillary carcinoma, diffuse sclerosing variant	No	157 mCi|[Not Available]	[Not Available]|[Not Available]	157 mCi|[Not Available]	rhTSH|[Not Available]	C73	mar-50	C73.9	YES	5	[Not Available]	NO	[Not Available]	[Not Available]	[Not Available]	1.0	1.8	1.5	NO	5	[Not Available]	[Not Applicable]	M0	N1a
140	TCGA-DJ-A3VL	38	[Not Applicable]	CAC8246A-A806-4945-898A-105CD88B2752	[Not Available]	[Not Applicable]	[Not Applicable]	[Not Applicable]	[Not Applicable]	2013-03-27	-14219	[Not Applicable]	0	523	[Not Applicable]	NOT HISPANIC OR LATINO	[Not Applicable]	None	[Unknown]	MALE	NO	[Not Evaluated]|[Not Evaluated]|[Not Evaluated]	[Not Applicable]	Thyroid Papillary Carcinoma - Follicular (>= 99% follicular patterned)	[Not Applicable]	No	[Not Available]|[Not Available]	[Not Available]|[Not Available]	[Not Available]|[Not Available]	Patient did not receive I-131 treatment|[Not Available]	C73	mar-40	C73.9	YES	1	Ultrasound	YES	[Not Available]	[Not Available]	[Not Available]	0.5	0.6	0.5	YES	0	[Not Available]	[Not Applicable]	M0	N0
141	TCGA-DJ-A3VM	68	[Not Applicable]	1EBD5834-56B8-498A-8F34-C0031FCFD856	[Not Available]	[Not Applicable]	[Not Applicable]	[Not Applicable]	[Not Applicable]	2012-08-21	-24896	[Not Applicable]	0	481	[Not Applicable]	NOT HISPANIC OR LATINO	[Not Applicable]	None	Sibling	FEMALE	NO	[Not Evaluated]|[Not Evaluated]|[Not Evaluated]	[Not Applicable]	Thyroid Papillary Carcinoma - Follicular (>= 99% follicular patterned)	[Not Applicable]	No	104.8 mCi|[Not Available]	[Not Available]|[Not Available]	104.8 mCi|[Not Available]	rhTSH|[Not Available]	C73	mar-40	C73.9	YES	[Not Available]	Ultrasound	YES	[Not Available]	[Not Available]	[Not Available]	2.0	3.0	2.7	NO	[Not Available]	[Not Available]	[Not Applicable]	M0	N0
142	TCGA-DJ-A4UL	68	[Not Applicable]	7851512B-5F44-43DE-8B27-99B5E91A8119	[Not Available]	[Not Applicable]	[Not Applicable]	[Not Applicable]	[Not Applicable]	2013-03-12	-24939	[Not Applicable]	0	363	[Not Applicable]	NOT HISPANIC OR LATINO	[Not Applicable]	None	[Not Available]	FEMALE	NO	[Not Evaluated]|[Not Evaluated]|[Not Evaluated]	[Not Applicable]	Thyroid Papillary Carcinoma - Classical/usual	[Not Applicable]	No	[Not Available]|[Not Available]	[Not Available]|[Not Available]	[Not Available]|[Not Available]	Patient did not receive I-131 treatment|[Not Available]	C73	mar-60	C73.9	YES	3	Ultrasound	YES	[Not Available]	[Not Available]	[Not Available]	0.6	1.1	0.7	NO	0	[Not Available]	[Not Applicable]	M0	N0
143	TCGA-DJ-A4UQ	60	[Not Applicable]	274225CF-A0F4-4635-848B-819F479001DE	[Not Available]	[Not Applicable]	[Not Applicable]	[Not Applicable]	[Not Applicable]	2013-03-12	-22099	[Not Applicable]	0	328	[Not Applicable]	NOT HISPANIC OR LATINO	[Not Applicable]	Minimal (T3)	[Not Available]	MALE	NO	[Not Evaluated]|[Not Evaluated]|[Not Evaluated]	[Not Applicable]	Other specify	Papillary carcinoma, diffuse sclerosing variant	No	148.8 mCi|[Not Available]	0|[Not Available]	148.8 mCi|[Not Available]	rhTSH|[Not Available]	C73	mar-50	C73.9	YES	99	Ultrasound	YES	[Not Available]	[Not Available]	[Not Available]	0.3	1.5	0.5	NO	31	[Not Available]	[Not Applicable]	M0	N1b
144	TCGA-DJ-A4UR	36	[Not Applicable]	C53C4BFE-D9D2-4882-A46B-FA487D95B8BA	[Not Available]	[Not Applicable]	[Not Applicable]	[Not Applicable]	[Not Applicable]	2013-03-12	-13455	[Not Applicable]	0	334	[Not Applicable]	NOT HISPANIC OR LATINO	[Not Applicable]	Minimal (T3)	[Not Available]	FEMALE	NO	[Not Evaluated]|[Not Evaluated]|[Not Evaluated]	[Not Applicable]	Thyroid Papillary Carcinoma - Follicular (>= 99% follicular patterned)	[Not Applicable]	No	154.0 mCi|[Not Available]	0|[Not Available]	154.0 mCi|[Not Available]	rhTSH|[Not Available]	C73	mar-40	C73.9	YES	23	Ultrasound	YES	Lung	RAI-avid|Imaging Suspected	[Not Available]	[Not Available]	2	[Not Available]	NO	11	[Not Available]	[Not Applicable]	M1	N1b
145	TCGA-DJ-A4UT	32	[Not Applicable]	ACB80B76-2394-4250-8687-60E40E16E83B	[Not Available]	[Not Applicable]	[Not Applicable]	[Not Applicable]	[Not Applicable]	2013-03-12	-11811	[Not Applicable]	0	371	[Not Applicable]	NOT HISPANIC OR LATINO	[Not Applicable]	None	[Not Available]	FEMALE	NO	[Not Evaluated]|[Not Evaluated]|[Not Evaluated]	[Not Applicable]	Thyroid Papillary Carcinoma - Classical/usual	[Not Applicable]	No	[Not Available]|[Not Available]	[Not Available]|[Not Available]	[Not Available]|[Not Available]	Patient did not receive I-131 treatment|[Not Available]	C73	mar-60	C73.9	YES	[Not Available]	Ultrasound	YES	[Not Available]	[Not Available]	[Not Available]	0.6	1.0	0.6	NO	[Not Available]	[Not Available]	[Not Applicable]	M0	N0
146	TCGA-DJ-A4UW	34	[Not Applicable]	97384352-0E80-42C2-8A8B-7BDBDA2B58EE	[Not Available]	[Not Applicable]	[Not Applicable]	[Not Applicable]	[Not Applicable]	2013-03-12	-12571	[Not Applicable]	0	287	[Not Applicable]	NOT HISPANIC OR LATINO	[Not Applicable]	None	[Not Available]	FEMALE	NO	[Not Evaluated]|[Not Evaluated]|[Not Evaluated]	[Not Applicable]	Thyroid Papillary Carcinoma - Tall Cell (>= 50% tall cell features)	[Not Applicable]	No	144.1 mCi|[Not Available]	0|[Not Available]	144.1 mCi|[Not Available]	rhTSH|[Not Available]	C73	mar-44	C73.9	YES	25	Ultrasound	YES	[Not Available]	[Not Available]	[Not Available]	[Not Available]	1.4	[Not Available]	NO	13	[Not Available]	[Not Applicable]	M0	N1b
147	TCGA-DJ-A4V0	36	[Not Applicable]	FFFDB1D9-58D1-425C-AC12-1E1E5F443BF7	[Not Available]	[Not Applicable]	[Not Applicable]	[Not Applicable]	[Not Applicable]	2013-03-12	-13180	[Not Applicable]	0	284	[Not Applicable]	NOT HISPANIC OR LATINO	[Not Applicable]	None	[Not Available]	FEMALE	NO	[Not Evaluated]|[Not Evaluated]|No RET/PTC Rearrangement Detected	[Not Applicable]	Thyroid Papillary Carcinoma - Classical/usual	[Not Applicable]	No	[Not Available]|[Not Available]	[Not Available]|[Not Available]	[Not Available]|[Not Available]	Patient did not receive I-131 treatment|[Not Available]	C73	mar-60	C73.9	YES	[Not Available]	[Not Available]	NO	[Not Available]	[Not Available]	[Not Available]	1.5	2.1	1.5	NO	[Not Available]	[Not Available]	[Not Applicable]	M0	N0
148	TCGA-DJ-A4V2	38	[Not Applicable]	DA575651-8A69-4D08-AA0F-4A1891B0B44F	[Not Available]	[Not Applicable]	[Not Applicable]	[Not Applicable]	[Not Applicable]	2013-03-12	-14123	[Not Applicable]	0	94	[Not Applicable]	NOT HISPANIC OR LATINO	[Not Applicable]	None	Sibling	FEMALE	NO	[Not Evaluated]|[Not Evaluated]|[Not Evaluated]	[Not Applicable]	Thyroid Papillary Carcinoma - Classical/usual	[Not Applicable]	No	[Not Available]|[Not Available]	[Not Available]|[Not Available]	[Not Available]|[Not Available]	Patient did not receive I-131 treatment|[Not Available]	C73	mar-60	C73.9	YES	1	Ultrasound	YES	[Not Available]	[Not Available]	[Not Available]	1.5	3.0	2.5	NO	0	[Not Available]	[Not Applicable]	M0	N0
149	TCGA-DJ-A4V4	48	[Not Applicable]	B78C953F-F1BB-4295-85F1-23C4000CE9D3	[Not Available]	[Not Applicable]	[Not Applicable]	[Not Applicable]	[Not Applicable]	2013-03-12	-17869	[Not Applicable]	0	102	[Not Applicable]	NOT HISPANIC OR LATINO	[Not Applicable]	None	[Not Available]	FEMALE	NO	[Not Evaluated]|[Not Evaluated]|[Not Evaluated]	[Not Applicable]	Thyroid Papillary Carcinoma - Tall Cell (>= 50% tall cell features)	[Not Applicable]	No	[Not Available]|[Not Available]	[Not Available]|[Not Available]	[Not Available]|[Not Available]	Patient did not receive I-131 treatment|[Not Available]	C73	mar-44	C73.9	YES	[Not Available]	Ultrasound	YES	[Not Available]	[Not Available]	[Not Available]	0.6	0.9	0.8	NO	[Not Available]	[Not Available]	[Not Applicable]	M0	N0
150	TCGA-DJ-A4V5	55	[Not Applicable]	86D5865E-6A1C-467C-97C9-47460B77F5A4	[Not Available]	[Not Applicable]	[Not Applicable]	[Not Applicable]	[Not Applicable]	2013-03-12	-20118	[Not Applicable]	0	491	[Not Applicable]	NOT HISPANIC OR LATINO	[Not Applicable]	Minimal (T3)	[Not Available]	MALE	NO	[Not Evaluated]|[Not Evaluated]|[Not Evaluated]	[Not Applicable]	Thyroid Papillary Carcinoma - Classical/usual	[Not Applicable]	No	148.3 mCi|[Not Available]	0|[Not Available]	148.3 mCi|[Not Available]	rhTSH|[Not Available]	C73	mar-60	C73.9	YES	82	Ultrasound	YES	[Not Available]	[Not Available]	[Not Available]	1.0	4.1	3.2	NO	30	[Not Available]	[Not Applicable]	M0	N1b
151	TCGA-DO-A1JZ	23	[Not Applicable]	169f045f-1739-4b0b-9bdc-028aaca420f8	[Not Available]	[Not Applicable]	[Not Applicable]	[Not Applicable]	[Not Applicable]	2011-05-30	-8550	[Not Applicable]	0	1225	[Not Applicable]	NOT HISPANIC OR LATINO	[Not Applicable]	None	[Not Available]	FEMALE	NO	[Not Available]|[Not Available]|[Not Available]	[Not Applicable]	Thyroid Papillary Carcinoma - Follicular (>= 99% follicular patterned)	[Not Applicable]	No	[Not Available]	[Not Available]	[Not Available]	[Not Available]	C73	mar-40	C73.9	YES	[Not Available]	Ultrasound	YES	[Not Available]	[Not Available]	[Not Available]	2.5	3.3	3.0	[Not Available]	[Not Available]	[Not Available]	[Not Applicable]	MX	NX
152	TCGA-DO-A1K0	30	[Not Applicable]	b7a01148-5bab-4268-986a-a9cf7bca967f	[Not Available]	[Not Applicable]	[Not Applicable]	[Not Applicable]	[Not Applicable]	2011-05-30	-11216	[Not Applicable]	0	93	[Not Applicable]	NOT HISPANIC OR LATINO	[Not Applicable]	Minimal (T3)	[Not Available]	FEMALE	NO	[Not Available]|[Not Available]|[Not Available]	[Not Applicable]	Thyroid Papillary Carcinoma - Classical/usual	[Not Applicable]	No	[Not Available]	[Not Available]	[Not Available]	[Not Available]	C73	mar-60	C73.9	YES	14	Ultrasound	YES	[Not Available]	[Not Available]	[Not Available]	2.7	4.2	4.1	[Not Available]	9	[Not Available]	[Not Applicable]	MX	N1b
153	TCGA-DO-A2HM	49	[Not Applicable]	82DD133B-691B-4BBF-B948-6270869D9B69	[Not Available]	[Not Applicable]	[Not Applicable]	[Not Applicable]	[Not Applicable]	2012-10-02	-18068	[Not Applicable]	0	70	[Not Applicable]	NOT HISPANIC OR LATINO	[Not Applicable]	None	[Unknown]	MALE	NO	[Not Evaluated]|[Not Evaluated]|[Not Evaluated]	[Not Applicable]	Thyroid Papillary Carcinoma - Classical/usual	[Not Applicable]	No	[Not Available]|[Not Available]	[Not Available]|[Not Available]	[Not Available]|[Not Available]	[Unknown]|[Not Available]	C73	mar-60	C73.9	YES	5	[Not Available]	NO	[Not Available]	[Not Available]	[Not Available]	0.5	1.8	1.5	[Unknown]	3	[Not Available]	[Not Applicable]	MX	N1b
154	TCGA-E3-A3DY	37	[Not Applicable]	DFFEF9E8-5B69-43D9-A95B-0744DAA38D1D	[Not Available]	[Not Applicable]	[Not Applicable]	[Not Applicable]	[Not Applicable]	2012-01-12	-13859	[Not Applicable]	0	945	[Not Applicable]	NOT HISPANIC OR LATINO	[Not Applicable]	None	[Not Available]	MALE	NO	[Not Evaluated]|[Not Evaluated]|[Not Evaluated]	[Not Applicable]	Other specify	Papillary carcinoma: mixed papillary and follicular variant	No	[Not Available]	[Not Available]	[Not Available]	[Not Available]	C73	mar-40	C73.9	YES	5	Ultrasound	YES	[Not Available]	[Not Available]	[Not Available]	.9	1.7	1.1	[Not Available]	4	[Not Available]	[Not Applicable]	M0	N1a
155	TCGA-E3-A3DZ	55	[Not Applicable]	59E47734-96DE-4328-ACA7-E9423DDA9C52	[Not Available]	[Not Applicable]	[Not Applicable]	[Not Applicable]	[Not Applicable]	2012-01-12	-20251	[Not Applicable]	0	367	[Not Applicable]	NOT HISPANIC OR LATINO	[Not Applicable]	None	[Not Available]	FEMALE	NO	[Not Evaluated]|[Not Evaluated]|[Not Evaluated]	[Not Applicable]	Thyroid Papillary Carcinoma - Follicular (>= 99% follicular patterned)	[Not Applicable]	No	[Not Available]	[Not Available]	[Not Available]	[Not Available]	C73	mar-40	C73.9	YES	1	CT without contrast	YES	[Not Available]	[Not Available]	[Not Available]	3	4.5	5	[Not Available]	0	[Not Available]	[Not Applicable]	M0	N0
156	TCGA-E3-A3E0	34	[Not Applicable]	5BE6C0D9-6AD7-482F-BD00-0432702DF495	[Not Available]	[Not Applicable]	[Not Applicable]	[Not Applicable]	[Not Applicable]	2012-01-12	-12645	[Not Applicable]	0	1544	[Not Applicable]	NOT HISPANIC OR LATINO	[Not Applicable]	None	[Not Available]	FEMALE	NO	[Not Evaluated]|[Not Evaluated]|[Not Evaluated]	[Not Applicable]	Thyroid Papillary Carcinoma - Classical/usual	[Not Applicable]	No	[Not Available]	[Not Available]	[Not Available]	[Not Available]	C73	mar-60	C73.9	YES	3	Ultrasound	YES	[Not Available]	[Not Available]	[Not Available]	1.0	2.4	1.5	[Not Available]	0	[Not Available]	[Not Applicable]	MX	N0
157	TCGA-E3-A3E1	46	[Not Applicable]	884AD3B9-5350-4580-85F6-80AC05A6DCEA	[Not Available]	[Not Applicable]	[Not Applicable]	[Not Applicable]	[Not Applicable]	2012-01-12	-16895	[Not Applicable]	0	1222	[Not Applicable]	NOT HISPANIC OR LATINO	[Not Applicable]	None	[Not Available]	FEMALE	NO	[Not Evaluated]|[Not Evaluated]|[Not Evaluated]	[Not Applicable]	Thyroid Papillary Carcinoma - Classical/usual	[Not Applicable]	No	[Not Available]	[Not Available]	[Not Available]	[Not Available]	C73	mar-60	C73.9	YES	2	Ultrasound	YES	[Not Available]	[Not Available]	[Not Available]	1.0	1.5	1.5	[Not Available]	0	[Not Available]	[Not Applicable]	M0	N0
158	TCGA-E3-A3E2	34	[Not Applicable]	EFBDEDAA-4B02-40AC-B93C-9670C018CF7F	[Not Available]	[Not Applicable]	[Not Applicable]	[Not Applicable]	[Not Applicable]	2012-01-12	-12714	[Not Applicable]	0	1421	[Not Applicable]	NOT HISPANIC OR LATINO	[Not Applicable]	None	Sibling	FEMALE	NO	[Not Evaluated]|[Not Evaluated]|[Not Evaluated]	[Not Applicable]	Thyroid Papillary Carcinoma - Follicular (>= 99% follicular patterned)	[Not Applicable]	No	[Not Available]	[Not Available]	[Not Available]	[Not Available]	C73	mar-40	C73.9	YES	8	Ultrasound	YES	[Not Available]	[Not Available]	[Not Available]	1.7	1.0	1.0	[Not Available]	2	[Not Available]	[Not Applicable]	MX	N1a
159	TCGA-E3-A3E3	49	[Not Applicable]	63E8C48E-F01B-4A7F-87E2-30607A2C8F6C	[Not Available]	[Not Applicable]	[Not Applicable]	[Not Applicable]	[Not Applicable]	2012-01-12	-18140	[Not Applicable]	0	635	[Not Applicable]	NOT HISPANIC OR LATINO	[Not Applicable]	None	[Not Available]	FEMALE	NO	[Not Evaluated]|[Not Evaluated]|[Not Evaluated]	[Not Applicable]	Thyroid Papillary Carcinoma - Classical/usual	[Not Applicable]	No	[Not Available]	[Not Available]	[Not Available]	[Not Available]	C73	mar-60	C73.9	YES	1	Ultrasound	YES	[Not Available]	[Not Available]	[Not Available]	1.5	2.8	1.7	[Not Available]	0	[Not Available]	[Not Applicable]	M0	N0
160	TCGA-E3-A3E5	57	[Not Applicable]	90750006-FB25-4CCD-90DF-9F300CD26A5B	[Not Available]	[Not Applicable]	[Not Applicable]	[Not Applicable]	[Not Applicable]	2011-01-12	-20993	[Not Applicable]	0	427	[Not Applicable]	NOT HISPANIC OR LATINO	[Not Applicable]	None	[Not Available]	MALE	NO	[Not Evaluated]|[Not Evaluated]|[Not Evaluated]	[Not Applicable]	Thyroid Papillary Carcinoma - Classical/usual	[Not Applicable]	No	[Not Available]	[Not Available]	[Not Available]	[Not Available]	C73	mar-60	C73.9	YES	28	Ultrasound	YES	[Not Available]	[Not Available]	[Not Available]	[Not Available]	1.0	.9	[Not Available]	13	[Not Available]	[Not Applicable]	MX	N1b
161	TCGA-E8-A242	56	[Not Applicable]	4d9de9a1-7df1-412e-9f16-15dd51b4c5f5	[Not Available]	[Not Applicable]	[Not Applicable]	[Not Applicable]	[Not Applicable]	2011-03-30	-20472	[Not Applicable]	0	34	[Not Applicable]	NOT HISPANIC OR LATINO	[Not Applicable]	Minimal (T3)	[Not Available]	FEMALE	[Not Available]	[Not Evaluated]|[Not Evaluated]|[Not Evaluated]	[Not Applicable]	Thyroid Papillary Carcinoma - Classical/usual	[Not Applicable]	No	[Not Available]	[Not Available]	[Not Available]	[Not Available]	C73	mar-60	C73.9	YES	1	[Not Available]	NO	[Not Available]	[Not Available]	[Not Available]	[Not Available]	1.8	[Not Available]	[Not Available]	0	[Not Available]	[Not Applicable]	MX	N0
162	TCGA-E8-A2EA	52	[Not Applicable]	980D1C65-B675-4568-9CE8-C0278686AE8D	[Not Available]	[Not Applicable]	[Not Applicable]	[Not Applicable]	[Not Applicable]	2011-10-07	-19159	[Not Applicable]	0	11	[Not Applicable]	NOT HISPANIC OR LATINO	[Not Applicable]	None	[Not Available]	FEMALE	[Not Available]	[Not Available]|[Not Available]|[Not Available]	[Not Applicable]	Thyroid Papillary Carcinoma - Classical/usual	[Not Applicable]	No	[Not Available]	[Not Available]	[Not Available]	[Not Available]	C73	mar-60	C73.9	YES	12	[Not Available]	NO	[Not Available]	[Not Available]	[Not Available]	[Not Available]	1.5	[Not Available]	[Not Available]	0	[Not Available]	[Not Applicable]	M0	N0
163	TCGA-E8-A2JQ	18	[Not Applicable]	F69FF5FB-7E0B-4B16-9FC9-498379B11562	[Not Available]	[Not Applicable]	[Not Applicable]	[Not Applicable]	[Not Applicable]	2011-12-20	-6683	[Not Applicable]	0	0	[Not Applicable]	NOT HISPANIC OR LATINO	[Not Applicable]	Minimal (T3)	[Not Available]	FEMALE	[Not Available]	[Not Available]|[Not Available]|[Not Available]	[Not Applicable]	Thyroid Papillary Carcinoma - Classical/usual	[Not Applicable]	No	[Not Available]	[Not Available]	[Not Available]	[Not Available]	C73	mar-60	C73.9	YES	14	[Not Available]	NO	[Not Available]	Biopsy Proven	Lymph node biopsies	[Not Available]	2.1	1.9	[Not Available]	11	[Not Available]	[Not Applicable]	M0	N1a
164	TCGA-E8-A3X7	57	[Not Applicable]	F3665B89-957B-4D7B-B67F-39615C47D28B	[Not Available]	[Not Applicable]	[Not Applicable]	[Not Applicable]	[Not Applicable]	2012-08-14	-20983	[Not Applicable]	0	45	[Not Applicable]	NOT HISPANIC OR LATINO	[Not Applicable]	Moderate/Advanced (T4a)	[Not Available]	FEMALE	[Unknown]	[Not Available]|[Not Available]|[Not Available]	[Not Applicable]	Thyroid Papillary Carcinoma - Classical/usual	[Not Applicable]	No	[Not Available]|[Not Available]	[Not Available]|[Not Available]	[Not Available]|[Not Available]	[Not Available]|[Not Available]	C73	mar-60	C73.9	YES	[Not Available]	[Not Available]	NO	[Not Available]	[Not Available]	[Not Available]	[Not Available]	1	[Not Available]	[Unknown]	[Not Available]	[Not Available]	[Not Applicable]	M0	N0
165	TCGA-E8-A413	38	[Not Applicable]	D5EA6520-E446-43D2-9883-441F70D80359	[Not Available]	[Not Applicable]	[Not Applicable]	[Not Applicable]	[Not Applicable]	2012-09-21	-13909	[Not Applicable]	0	10	[Not Applicable]	NOT HISPANIC OR LATINO	[Not Applicable]	None	[Unknown]	FEMALE	[Unknown]	[Not Available]|[Not Available]|[Not Available]	[Not Applicable]	Thyroid Papillary Carcinoma - Classical/usual	[Not Applicable]	No	[Not Available]|[Not Available]	[Not Available]|[Not Available]	[Not Available]|[Not Available]	[Not Available]|[Not Available]	C73	mar-60	C73.9	YES	[Not Available]	Ultrasound	YES	[Not Available]	[Not Available]	[Not Available]	[Not Available]	[Not Available]	1.5	NO	[Not Available]	[Not Available]	[Not Applicable]	M0	N0
166	TCGA-E8-A414	45	[Not Applicable]	23F47401-1BAB-4395-970F-4E388AAB2542	[Not Available]	[Not Applicable]	[Not Applicable]	[Not Applicable]	[Not Applicable]	2012-09-12	-16754	[Not Applicable]	0	7	[Not Applicable]	NOT HISPANIC OR LATINO	[Not Applicable]	None	[Unknown]	FEMALE	[Unknown]	[Not Available]|[Not Available]|[Not Available]	[Not Applicable]	Thyroid Papillary Carcinoma - Classical/usual	[Not Applicable]	No	[Not Available]|[Not Available]	[Not Available]|[Not Available]	[Not Available]|[Not Available]	[Not Available]|[Not Available]	C73	mar-60	C73.9	YES	1	Ultrasound	YES	[Not Available]	[Not Available]	[Not Available]	[Not Available]	[Not Available]	5	NO	0	[Not Available]	[Not Applicable]	M0	N0
167	TCGA-E8-A415	39	[Not Applicable]	C438C562-A2B6-4CEB-B91A-7E77EB2EC962	[Not Available]	[Not Applicable]	[Not Applicable]	[Not Applicable]	[Not Applicable]	2012-09-21	-14287	[Not Applicable]	0	5	[Not Applicable]	NOT HISPANIC OR LATINO	[Not Applicable]	None	[Not Available]	FEMALE	NO	[Not Available]|[Not Available]|[Not Available]	[Not Applicable]	Thyroid Papillary Carcinoma - Classical/usual	[Not Applicable]	No	[Not Available]|[Not Available]	[Not Available]|[Not Available]	[Not Available]|[Not Available]	[Not Available]|[Not Available]	C73	mar-60	C73.9	YES	2	Ultrasound	YES	[Not Available]	[Not Available]	[Not Available]	[Not Available]	[Not Available]	1	NO	1	[Not Available]	[Not Applicable]	M0	N1b
168	TCGA-E8-A416	51	[Not Applicable]	86B82345-6F4D-44FD-A9DB-6F107DE62F53	[Not Available]	[Not Applicable]	[Not Applicable]	[Not Applicable]	[Not Applicable]	2012-09-21	-18932	[Not Applicable]	0	22	[Not Applicable]	NOT HISPANIC OR LATINO	[Not Applicable]	None	[Not Available]	FEMALE	NO	[Not Available]|[Not Available]|[Not Available]	[Not Applicable]	Thyroid Papillary Carcinoma - Classical/usual	[Not Applicable]	No	[Not Available]|[Not Available]	[Not Available]|[Not Available]	[Not Available]|[Not Available]	[Not Available]|[Not Available]	C73	mar-60	C73.9	YES	[Not Available]	Ultrasound	YES	[Not Available]	[Not Available]	[Not Available]	[Not Available]	[Not Available]	1.5	NO	[Not Available]	[Not Available]	[Not Applicable]	M0	N0
169	TCGA-E8-A417	38	[Not Applicable]	93691BAE-F1BD-437E-AE72-B50736D1E29A	[Not Available]	[Not Applicable]	[Not Applicable]	[Not Applicable]	[Not Applicable]	2012-09-21	-14018	[Not Applicable]	0	8	[Not Applicable]	NOT HISPANIC OR LATINO	[Not Applicable]	None	[Not Available]	FEMALE	NO	[Not Available]|[Not Available]|[Not Available]	[Not Applicable]	Thyroid Papillary Carcinoma - Classical/usual	[Not Applicable]	No	[Not Available]|[Not Available]	[Not Available]|[Not Available]	[Not Available]|[Not Available]	[Not Available]|[Not Available]	C73	mar-60	C73.9	YES	2	Ultrasound	YES	[Not Available]	[Not Available]	[Not Available]	[Not Available]	[Not Available]	2.5	NO	2	[Not Available]	[Not Applicable]	M0	N1a
170	TCGA-E8-A418	75	[Not Applicable]	EBBD54AD-7B97-4081-AD11-7F7F3CE74EEF	[Not Available]	[Not Applicable]	[Not Applicable]	[Not Applicable]	[Not Applicable]	2012-09-12	-27737	[Not Applicable]	0	45	[Not Applicable]	NOT HISPANIC OR LATINO	[Not Applicable]	Moderate/Advanced (T4a)	[Unknown]	FEMALE	[Unknown]	[Not Available]|[Not Available]|[Not Available]	[Not Applicable]	Thyroid Papillary Carcinoma - Classical/usual	[Not Applicable]	No	[Not Available]|[Not Available]	[Not Available]|[Not Available]	[Not Available]|[Not Available]	[Not Available]|[Not Available]	C73	mar-60	C73.9	YES	[Not Available]	[Not Available]	NO	[Not Available]	[Not Available]	[Not Available]	[Not Available]	[Not Available]	9	NO	[Not Available]	[Not Available]	[Not Applicable]	M0	N0
171	TCGA-E8-A419	30	[Not Applicable]	A2E2FAC3-CCA5-4E33-AA6C-1D9D3AC3AEEC	[Not Available]	[Not Applicable]	[Not Applicable]	[Not Applicable]	[Not Applicable]	2012-09-12	-11306	[Not Applicable]	0	0	[Not Applicable]	NOT HISPANIC OR LATINO	[Not Applicable]	None	[Not Available]	FEMALE	[Unknown]	[Not Available]|[Not Available]|[Not Available]	[Not Applicable]	Thyroid Papillary Carcinoma - Classical/usual	[Not Applicable]	No	[Not Available]|[Not Available]	[Not Available]|[Not Available]	[Not Available]|[Not Available]	[Not Available]|[Not Available]	C73	mar-60	C73.9	YES	5	[Not Available]	NO	[Not Available]	Imaging Suspected	[Not Available]	2	2.5	3	NO	1	[Not Available]	[Not Applicable]	M0	N1
172	TCGA-E8-A432	57	[Not Applicable]	AA3CE865-4BC1-4CCA-9BA8-35FF4C5E165E	[Not Available]	[Not Applicable]	[Not Applicable]	[Not Applicable]	[Not Applicable]	2012-11-19	-20873	[Not Applicable]	0	16	[Not Applicable]	NOT HISPANIC OR LATINO	[Not Applicable]	None	[Unknown]	FEMALE	[Not Available]	[Not Available]|[Not Available]|[Not Available]	[Not Applicable]	Thyroid Papillary Carcinoma - Classical/usual	[Not Applicable]	No	[Not Available]|[Not Available]	[Not Available]|[Not Available]	[Not Available]|[Not Available]	[Not Available]|[Not Available]	C73	mar-60	C73.9	YES	[Not Available]	Ultrasound	YES	[Not Available]	[Not Available]	[Not Available]	[Not Available]	[Not Available]	2.5	NO	[Not Available]	[Not Available]	[Not Applicable]	M0	N0
173	TCGA-E8-A433	25	[Not Applicable]	4BE84FFE-4B12-4B71-90BB-9EA0CA6947F8	[Not Available]	[Not Applicable]	[Not Applicable]	[Not Applicable]	[Not Applicable]	2012-11-19	-9145	[Not Applicable]	0	5	[Not Applicable]	NOT HISPANIC OR LATINO	[Not Applicable]	None	[Unknown]	FEMALE	[Not Available]	[Not Available]|[Not Available]|[Not Available]	[Not Applicable]	Thyroid Papillary Carcinoma - Classical/usual	[Not Applicable]	No	[Not Available]|[Not Available]	[Not Available]|[Not Available]	[Not Available]|[Not Available]	[Not Available]|[Not Available]	C73	mar-60	C73.9	YES	2	Ultrasound	YES	[Not Available]	[Not Available]	[Not Available]	[Not Available]	[Not Available]	2.5	NO	0	[Not Available]	[Not Applicable]	M0	N0
174	TCGA-E8-A434	56	[Not Applicable]	EFC46DB7-F9DF-494E-ACCA-357CB64C019A	[Not Available]	[Not Applicable]	[Not Applicable]	[Not Applicable]	[Not Applicable]	2012-11-19	-20491	[Not Applicable]	0	7	[Not Applicable]	NOT HISPANIC OR LATINO	[Not Applicable]	None	Parent	FEMALE	[Not Available]	[Not Available]|[Not Available]|[Not Available]	[Not Applicable]	Thyroid Papillary Carcinoma - Classical/usual	[Not Applicable]	No	[Not Available]|[Not Available]	[Not Available]|[Not Available]	[Not Available]|[Not Available]	[Not Available]|[Not Available]	C73	mar-60	C73.9	YES	[Not Available]	Ultrasound	YES	[Not Available]	[Not Available]	[Not Available]	[Not Available]	[Not Available]	0.7	NO	[Not Available]	[Not Available]	[Not Applicable]	M0	N0
175	TCGA-E8-A436	53	[Not Applicable]	DFF3C4F1-9009-4111-9FC2-3834F8F7DBDD	[Not Available]	[Not Applicable]	[Not Applicable]	[Not Applicable]	[Not Applicable]	2012-11-19	-19640	[Not Applicable]	0	35	[Not Applicable]	NOT HISPANIC OR LATINO	[Not Applicable]	None	[Not Available]	FEMALE	[Not Available]	[Not Available]|[Not Available]|[Not Available]	[Not Applicable]	Thyroid Papillary Carcinoma - Classical/usual	[Not Applicable]	No	[Not Available]|[Not Available]	[Not Available]|[Not Available]	[Not Available]|[Not Available]	[Not Available]|[Not Available]	C73	mar-60	C73.9	YES	10	Ultrasound	YES	[Not Available]	[Not Available]	[Not Available]	[Not Available]	[Not Available]	2.5	NO	1	[Not Available]	[Not Applicable]	M0	N1b
176	TCGA-E8-A437	57	[Not Applicable]	1DA4AB7D-4353-4565-A522-D2FECADD4A85	[Not Available]	[Not Applicable]	[Not Applicable]	[Not Applicable]	[Not Applicable]	2012-11-20	-21073	[Not Applicable]	0	234	[Not Applicable]	[Unknown]	[Not Applicable]	None	[Unknown]	FEMALE	NO	[Not Available]|[Not Available]|[Not Available]	[Not Applicable]	Thyroid Papillary Carcinoma - Classical/usual	[Not Applicable]	No	[Not Available]|[Not Available]	[Not Available]|[Not Available]	[Not Available]|[Not Available]	[Not Available]|[Not Available]	C73	mar-60	C73.9	YES	[Not Available]	[Not Available]	NO	[Not Available]	[Not Available]	[Not Available]	[Not Available]	[Not Available]	1.5	NO	[Not Available]	[Not Available]	[Not Applicable]	M0	NX
177	TCGA-E8-A438	23	[Not Applicable]	F12FA57B-3427-45FE-994B-602F498B68DA	[Not Available]	[Not Applicable]	[Not Applicable]	[Not Applicable]	[Not Applicable]	2012-11-20	-8751	[Not Applicable]	0	210	[Not Applicable]	NOT HISPANIC OR LATINO	[Not Applicable]	None	[Not Available]	FEMALE	[Not Available]	[Not Available]|[Not Available]|[Not Available]	[Not Applicable]	Thyroid Papillary Carcinoma - Classical/usual	[Not Applicable]	No	[Not Available]|[Not Available]	[Not Available]|[Not Available]	[Not Available]|[Not Available]	[Not Available]|[Not Available]	C73	mar-60	C73.9	YES	3	Ultrasound	YES	[Not Available]	[Not Available]	[Not Available]	[Not Available]	[Not Available]	2.3	NO	0	[Not Available]	[Not Applicable]	M0	N0
178	TCGA-E8-A44K	50	[Not Applicable]	A552E8AB-9DEC-44EA-9F02-7CA704EE8467	[Not Available]	[Not Applicable]	[Not Applicable]	[Not Applicable]	[Not Applicable]	2012-12-18	-18472	[Not Applicable]	0	12	[Not Applicable]	NOT HISPANIC OR LATINO	[Not Applicable]	None	[Not Available]	FEMALE	[Not Available]	[Not Available]|[Not Available]|[Not Available]	[Not Applicable]	Thyroid Papillary Carcinoma - Classical/usual	[Not Applicable]	No	[Not Available]|[Not Available]	[Not Available]|[Not Available]	[Not Available]|[Not Available]	[Not Available]|[Not Available]	C73	mar-60	C73.9	YES	3	Ultrasound	YES	[Not Available]	[Not Available]	[Not Available]	[Not Available]	[Not Available]	2	NO	0	[Not Available]	[Not Applicable]	M0	N0
179	TCGA-E8-A44M	23	[Not Applicable]	2D633CED-AE85-462C-90E7-C1B109E084CF	[Not Available]	[Not Applicable]	[Not Applicable]	[Not Applicable]	[Not Applicable]	2012-12-18	-8522	[Not Applicable]	0	12	[Not Applicable]	NOT HISPANIC OR LATINO	[Not Applicable]	None	[Not Available]	FEMALE	[Not Available]	[Not Available]|[Not Available]|[Not Available]	[Not Applicable]	Thyroid Papillary Carcinoma - Classical/usual	[Not Applicable]	No	[Not Available]|[Not Available]	[Not Available]|[Not Available]	[Not Available]|[Not Available]	[Not Available]|[Not Available]	C73	mar-60	C73.9	YES	[Not Available]	Ultrasound	YES	[Not Available]	[Not Available]	[Not Available]	[Not Available]	[Not Available]	1	NO	[Not Available]	[Not Available]	[Not Applicable]	M0	N0
180	TCGA-EL-A3CL	70	[Not Applicable]	641BA101-135B-4395-9360-2058FABFED56	[Not Available]	[Not Applicable]	[Not Applicable]	[Not Applicable]	[Not Applicable]	2013-03-08	-25761	[Not Applicable]	0	[Not Available]	[Not Applicable]	NOT HISPANIC OR LATINO	[Not Applicable]	None	[Not Available]	FEMALE	[Not Available]	[Not Available]|[Not Available]|[Not Available]	[Not Applicable]	Thyroid Papillary Carcinoma - Classical/usual	[Not Applicable]	No	[Not Available]|[Not Available]	[Not Available]|[Not Available]	[Not Available]|[Not Available]	[Not Available]|[Not Available]	C73	mar-60	C73.9	YES	[Not Available]	[Not Available]	NO	[Not Available]	[Not Available]	[Not Available]	[Not Available]	3	[Not Available]	NO	[Not Available]	[Not Available]	[Not Applicable]	M0	NX
181	TCGA-EL-A3CM	64	[Not Applicable]	229004AF-14EB-442E-905E-61C842B3EFA0	[Not Available]	[Not Applicable]	[Not Applicable]	[Not Applicable]	[Not Applicable]	2013-03-08	-23406	[Not Applicable]	0	[Not Available]	[Not Applicable]	HISPANIC OR LATINO	[Not Applicable]	Minimal (T3)	[Not Available]	FEMALE	[Not Available]	[Not Available]|[Not Available]|[Not Available]	[Not Applicable]	Thyroid Papillary Carcinoma - Classical/usual	[Not Applicable]	No	[Not Available]|[Not Available]	[Not Available]|[Not Available]	[Not Available]|[Not Available]	Patient did not receive I-131 treatment|[Not Available]	C73	mar-60	C73.9	YES	16	CT without contrast	YES	[Not Available]	[Not Available]	[Not Available]	[Not Available]	5.0	[Not Available]	NO	3	[Not Available]	[Not Applicable]	M0	N1b
182	TCGA-EL-A3CN	47	[Not Applicable]	471636D5-9ECA-49DF-872A-C2A2CAC61838	[Not Available]	[Not Applicable]	[Not Applicable]	[Not Applicable]	[Not Applicable]	2013-03-08	-17456	[Not Applicable]	0	3955	[Not Applicable]	NOT HISPANIC OR LATINO	[Not Applicable]	Minimal (T3)	[Not Available]	FEMALE	[Not Available]	[Not Available]|[Not Available]|[Not Available]	[Not Applicable]	Thyroid Papillary Carcinoma - Classical/usual	[Not Applicable]	No	[Not Available]|[Not Available]	[Not Available]|[Not Available]	[Not Available]|[Not Available]	Patient did not receive I-131 treatment|[Not Available]	C73	mar-60	C73.9	YES	1	Ultrasound	YES	[Not Available]	[Not Available]	[Not Available]	1.3	1.5	1.3	NO	0	[Not Available]	[Not Applicable]	M0	N0
183	TCGA-EL-A3CO	88	[Not Applicable]	FD661B1B-FE0B-4AB0-AE82-76324E2F6A81	[Not Available]	[Not Applicable]	[Not Applicable]	[Not Applicable]	[Not Applicable]	2013-03-08	-32145	[Not Applicable]	0	[Not Available]	[Not Applicable]	NOT HISPANIC OR LATINO	[Not Applicable]	Minimal (T3)	[Not Available]	MALE	[Not Available]	[Not Available]|[Not Available]|[Not Available]	[Not Applicable]	Thyroid Papillary Carcinoma - Classical/usual	[Not Applicable]	No	[Not Available]|[Not Available]	[Not Available]|[Not Available]	[Not Available]|[Not Available]	Patient did not receive I-131 treatment|[Not Available]	C73	mar-60	C73.9	YES	41	[Not Available]	NO	[Not Available]	[Not Available]	[Not Available]	3.0	3.5	3.5	NO	10	[Not Available]	[Not Applicable]	M0	N1b
184	TCGA-EL-A3CP	50	[Not Applicable]	3585DDAB-FE5E-4A5A-92C7-3CBAFF52AF57	[Not Available]	[Not Applicable]	[Not Applicable]	[Not Applicable]	[Not Applicable]	2012-10-12	-18298	[Not Applicable]	0	3656	[Not Applicable]	NOT HISPANIC OR LATINO	[Not Applicable]	None	[Not Available]	FEMALE	[Not Available]	[Not Available]|[Not Available]|[Not Available]	[Not Applicable]	Thyroid Papillary Carcinoma - Follicular (>= 99% follicular patterned)	[Not Applicable]	No	[Not Available]|[Not Available]	[Not Available]|[Not Available]	[Not Available]|[Not Available]	Patient did not receive I-131 treatment|[Not Available]	C73	mar-40	C73.9	YES	[Not Available]	Ultrasound|CT with contrast	YES	[Not Available]	[Not Available]	[Not Available]	[Not Available]	1.1	[Not Available]	NO	[Not Available]	[Not Available]	[Not Applicable]	M0	NX
185	TCGA-EL-A3CR	78	[Not Applicable]	258DCCEE-A3CE-4D4B-A60C-64F45EBFB7AD	[Not Available]	[Not Applicable]	[Not Applicable]	[Not Applicable]	[Not Applicable]	2013-03-11	-28784	[Not Applicable]	0	[Not Available]	[Not Applicable]	NOT HISPANIC OR LATINO	[Not Applicable]	Minimal (T3)	[Not Available]	FEMALE	[Not Available]	[Not Available]|[Not Available]|[Not Available]	[Not Applicable]	Thyroid Papillary Carcinoma - Classical/usual	[Not Applicable]	No	[Not Available]|[Not Available]	[Not Available]|[Not Available]	[Not Available]|[Not Available]	[Not Available]|[Not Available]	C73	mar-60	C73.9	YES	32	Ultrasound|CT without contrast	YES	[Not Available]	[Not Available]	[Not Available]	2.5	3.5	3.5	NO	8	[Not Available]	[Not Applicable]	M0	N1b
186	TCGA-EL-A3CS	62	[Not Applicable]	8B1987F7-75FD-4E24-BE77-891BBD2D40A1	[Not Available]	[Not Applicable]	[Not Applicable]	[Not Applicable]	[Not Applicable]	2012-10-12	-22993	[Not Applicable]	0	[Not Available]	[Not Applicable]	NOT HISPANIC OR LATINO	[Not Applicable]	Moderate/Advanced (T4a)	[Not Available]	FEMALE	[Not Available]	[Not Available]|[Not Available]|[Not Available]	[Not Applicable]	Thyroid Papillary Carcinoma - Classical/usual	[Not Applicable]	Yes	[Not Available]|[Not Available]	[Not Available]|[Not Available]	[Not Available]|[Not Available]	[Unknown]|[Not Available]	C73	mar-60	C73.9	YES	20	Ultrasound|CT with contrast|MRI with contrast	YES	[Not Available]	[Not Available]	[Not Available]	4.0	3.0	2.0	NO	0	[Not Available]	[Not Applicable]	M0	N0
187	TCGA-EL-A3CT	78	[Not Applicable]	4C0B29E6-8530-43D5-8E8A-EFB754E83ECD	[Not Available]	[Not Applicable]	[Not Applicable]	[Not Applicable]	[Not Applicable]	2013-03-15	-28596	[Not Applicable]	0	[Not Available]	[Not Applicable]	NOT HISPANIC OR LATINO	[Not Applicable]	Moderate/Advanced (T4a)	[Not Available]	FEMALE	[Not Available]	[Not Available]|[Not Available]|[Not Available]	[Not Applicable]	Thyroid Papillary Carcinoma - Classical/usual	[Not Applicable]	No	[Not Available]|[Not Available]	[Not Available]|[Not Available]	[Not Available]|[Not Available]	Patient did not receive I-131 treatment|[Not Available]	C73	mar-60	C73.9	YES	17	Ultrasound	YES	[Not Available]	[Not Available]	[Not Available]	1	6	3	NO	2	[Not Available]	[Not Applicable]	M0	N1a
188	TCGA-EL-A3CU	70	[Not Applicable]	745642A0-DDBA-495B-BAFC-DA085552758A	[Not Available]	[Not Applicable]	[Not Applicable]	[Not Applicable]	[Not Applicable]	2012-10-12	-25881	[Not Applicable]	0	4422	[Not Applicable]	NOT HISPANIC OR LATINO	[Not Applicable]	None	[Not Available]	FEMALE	[Not Available]	[Not Available]|[Not Available]|[Not Available]	[Not Applicable]	Thyroid Papillary Carcinoma - Classical/usual	[Not Applicable]	No	[Not Available]|[Not Available]	[Not Available]|[Not Available]	[Not Available]|[Not Available]	Patient did not receive I-131 treatment|[Not Available]	C73	mar-60	C73.9	YES	7	Ultrasound	YES	[Not Available]	[Not Available]	[Not Available]	1.5	7.0	4.0	NO	4	[Not Available]	[Not Applicable]	M0	N1a
189	TCGA-EL-A3CV	40	[Not Applicable]	FB83F7D7-2182-4FB7-8E3E-8AD7F1FEAC72	[Not Available]	[Not Applicable]	[Not Applicable]	[Not Applicable]	[Not Applicable]	2013-03-08	-14784	[Not Applicable]	0	1154	[Not Applicable]	HISPANIC OR LATINO	[Not Applicable]	Minimal (T3)	[Not Available]	MALE	[Not Available]	[Not Available]|[Not Available]|[Not Available]	[Not Applicable]	Thyroid Papillary Carcinoma - Classical/usual	[Not Applicable]	No	[Not Available]|[Not Available]	[Not Available]|[Not Available]	100|[Not Available]	rhTSH|[Not Available]	C73	mar-60	C73.9	YES	38	CT with contrast	YES	[Not Available]	[Not Available]	[Not Available]	4	5	3.5	NO	9	[Not Available]	[Not Applicable]	M0	N1b
190	TCGA-EL-A3CW	87	[Not Applicable]	011AE7B8-5003-4FCD-9F20-906A723F2C66	[Not Available]	[Not Applicable]	[Not Applicable]	[Not Applicable]	[Not Applicable]	2012-10-12	-31933	[Not Applicable]	0	[Not Available]	[Not Applicable]	NOT HISPANIC OR LATINO	[Not Applicable]	None	[Not Available]	FEMALE	[Not Available]	[Not Available]|[Not Available]|[Not Available]	[Not Applicable]	Thyroid Papillary Carcinoma - Classical/usual	[Not Applicable]	No	[Not Available]|[Not Available]	[Not Available]|[Not Available]	[Not Available]|[Not Available]	[Not Available]|[Not Available]	C73	mar-60	C73.9	YES	21	[Not Available]	NO	[Not Available]	[Not Available]	[Not Available]	2.0	5.0	4.0	NO	14	[Not Available]	[Not Applicable]	M0	N1a
191	TCGA-EL-A3CX	22	[Not Applicable]	934A58AF-0FFC-487E-9E95-FA7643B7D5CB	[Not Available]	[Not Applicable]	[Not Applicable]	[Not Applicable]	[Not Applicable]	2013-03-08	-8344	[Not Applicable]	0	2214	[Not Applicable]	HISPANIC OR LATINO	[Not Applicable]	None	[Not Available]	FEMALE	[Not Available]	[Not Available]|[Not Available]|[Not Available]	[Not Applicable]	Thyroid Papillary Carcinoma - Classical/usual	[Not Applicable]	No	[Not Available]|[Not Available]	[Not Available]|[Not Available]	[Not Available]|[Not Available]	Patient did not receive I-131 treatment|[Not Available]	C73	mar-60	C73.9	YES	13	Ultrasound	YES	[Not Available]	[Not Available]	[Not Available]	2.0	3.3	3.3	NO	0	[Not Available]	[Not Applicable]	M0	N0
192	TCGA-EL-A3CY	28	[Not Applicable]	AB17D69E-0078-4206-939E-E4784FDC9A96	[Not Available]	[Not Applicable]	[Not Applicable]	[Not Applicable]	[Not Applicable]	2013-03-15	-10422	[Not Applicable]	0	127	[Not Applicable]	NOT HISPANIC OR LATINO	[Not Applicable]	None	[Not Available]	MALE	[Not Available]	[Not Available]|[Not Available]|[Not Available]	[Not Applicable]	Thyroid Papillary Carcinoma - Classical/usual	[Not Applicable]	Yes	[Not Available]|[Not Available]	[Not Available]|[Not Available]	[Not Available]|[Not Available]	Patient did not receive I-131 treatment|[Not Available]	C73	mar-60	C73.9	YES	12	Ultrasound|MRI with contrast	YES	[Not Available]	[Not Available]	[Not Available]	1.9	5	3.3	NO	12	[Not Available]	[Not Applicable]	M0	N1b
193	TCGA-EL-A3CZ	37	[Not Applicable]	C951B786-7DE3-4195-85B9-C4C19E95F546	[Not Available]	[Not Applicable]	[Not Applicable]	[Not Applicable]	[Not Applicable]	2012-10-12	-13718	[Not Applicable]	0	1605	[Not Applicable]	NOT HISPANIC OR LATINO	[Not Applicable]	None	[Not Available]	FEMALE	[Not Available]	[Not Available]|[Not Available]|[Not Available]	[Not Applicable]	Thyroid Papillary Carcinoma - Classical/usual	[Not Applicable]	No	[Not Available]|[Not Available]	[Not Available]|[Not Available]	[Not Available]|[Not Available]	[Unknown]|[Not Available]	C73	mar-60	C73.9	YES	7	MRI with contrast	YES	[Not Available]	[Not Available]	[Not Available]	2.0	4.5	3.0	NO	1	[Not Available]	[Not Applicable]	M0	N1a
196	TCGA-EL-A3D5	44	[Not Applicable]	E9CCF355-E68A-489C-A914-31B766BD0AEF	[Not Available]	[Not Applicable]	[Not Applicable]	[Not Applicable]	[Not Applicable]	2013-03-11	-16217	[Not Applicable]	0	1017	[Not Applicable]	NOT HISPANIC OR LATINO	[Not Applicable]	Minimal (T3)	[Not Available]	FEMALE	[Not Available]	[Not Available]|[Not Available]|[Not Available]	[Not Applicable]	Thyroid Papillary Carcinoma - Classical/usual	[Not Applicable]	No	[Not Available]|[Not Available]	[Not Available]|[Not Available]	[Not Available]|[Not Available]	Patient did not receive I-131 treatment|[Not Available]	C73	mar-60	C73.9	YES	30	Ultrasound	YES	[Not Available]	[Not Available]	[Not Available]	2.0	6.0	4.0	NO	15	[Not Available]	[Not Applicable]	M0	N1b
197	TCGA-EL-A3D6	51	[Not Applicable]	2106F0CD-CB3C-4568-BDC5-197EE11F2337	[Not Available]	[Not Applicable]	[Not Applicable]	[Not Applicable]	[Not Applicable]	2012-10-12	-18640	[Not Applicable]	0	3296	[Not Applicable]	HISPANIC OR LATINO	[Not Applicable]	Minimal (T3)	[Not Available]	FEMALE	[Not Available]	[Not Available]|[Not Available]|[Not Available]	[Not Applicable]	Thyroid Papillary Carcinoma - Classical/usual	[Not Applicable]	No	[Not Available]|[Not Available]	[Not Available]|[Not Available]	[Not Available]|[Not Available]	Patient did not receive I-131 treatment|[Not Available]	C73	mar-60	C73.9	YES	5	CT with contrast	YES	[Not Available]	[Not Available]	[Not Available]	3.2	6.0	4.7	NO	1	[Not Available]	[Not Applicable]	M0	N1b
198	TCGA-EL-A3GO	31	[Not Applicable]	AA528913-CBBC-4E1D-B6D0-87F6A46BCBC9	[Not Available]	[Not Applicable]	[Not Applicable]	[Not Applicable]	[Not Applicable]	2013-03-07	-11603	[Not Applicable]	0	1196	[Not Applicable]	HISPANIC OR LATINO	[Not Applicable]	None	[Not Available]	FEMALE	[Not Available]	[Not Available]|[Not Available]|[Not Available]	[Not Applicable]	Thyroid Papillary Carcinoma - Classical/usual	[Not Applicable]	No	[Not Available]|[Not Available]	[Not Available]|[Not Available]	[Not Available]|[Not Available]	Patient did not receive I-131 treatment|[Not Available]	C73	mar-60	C73.9	YES	4	Ultrasound	YES	[Not Available]	[Not Available]	[Not Available]	2.1	3.2	2.4	NO	0	[Not Available]	[Not Applicable]	M0	N0
199	TCGA-EL-A3GP	70	[Not Applicable]	DD981E11-4B49-447E-8EBC-D9DB4B55CE9B	[Not Available]	[Not Applicable]	[Not Applicable]	[Not Applicable]	[Not Applicable]	2013-03-07	-25695	[Not Applicable]	0	43	[Not Applicable]	NOT HISPANIC OR LATINO	[Not Applicable]	Minimal (T3)	[Not Available]	MALE	[Not Available]	[Not Available]|[Not Available]|[Not Available]	[Not Applicable]	Thyroid Papillary Carcinoma - Classical/usual	[Not Applicable]	No	[Not Available]|[Not Available]	[Not Available]|[Not Available]	[Not Available]|[Not Available]	Patient did not receive I-131 treatment|[Not Available]	C73	mar-60	C73.9	YES	15	Ultrasound	YES	[Not Available]	[Not Available]	[Not Available]	3.5	5.5	5.0	NO	7	[Not Available]	[Not Applicable]	M0	N1a
200	TCGA-EL-A3GQ	72	[Not Applicable]	4E959D61-4F7F-4933-BADA-D33A621D9C03	[Not Available]	[Not Applicable]	[Not Applicable]	[Not Applicable]	[Not Applicable]	2013-03-11	-26477	[Not Applicable]	0	918	[Not Applicable]	NOT HISPANIC OR LATINO	[Not Applicable]	None	[Not Available]	FEMALE	[Not Available]	[Not Available]|[Not Available]|[Not Available]	[Not Applicable]	Thyroid Papillary Carcinoma - Follicular (>= 99% follicular patterned)	[Not Applicable]	No	[Not Available]|[Not Available]	[Not Available]|[Not Available]	[Not Available]|[Not Available]	[Not Available]|[Not Available]	C73	mar-40	C73.9	YES	1	Ultrasound|MRI without contrast	YES	[Not Available]	[Not Available]	[Not Available]	1.0	4.0	2.0	NO	0	[Not Available]	[Not Applicable]	M0	N0
201	TCGA-EL-A3GR	31	[Not Applicable]	B107B012-335A-4282-A7AA-273B740831F1	[Not Available]	[Not Applicable]	[Not Applicable]	[Not Applicable]	[Not Applicable]	2013-03-07	-11598	[Not Applicable]	0	3128	[Not Applicable]	NOT HISPANIC OR LATINO	[Not Applicable]	Minimal (T3)	[Not Available]	FEMALE	[Not Available]	[Not Available]|[Not Available]|[Not Available]	[Not Applicable]	Thyroid Papillary Carcinoma - Classical/usual	[Not Applicable]	No	[Not Available]|[Not Available]	107 mCi|[Not Available]	[Not Available]|[Not Available]	Thyroxine withdrawal|[Not Available]	C73	mar-60	C73.9	YES	[Not Available]	Ultrasound	YES	[Not Available]	[Not Available]	[Not Available]	1	3	2	NO	[Not Available]	[Not Available]	[Not Applicable]	M0	NX
202	TCGA-EL-A3GS	37	[Not Applicable]	24A968AA-8169-44CB-A8AC-72D7EFA1FA7B	[Not Available]	[Not Applicable]	[Not Applicable]	[Not Applicable]	[Not Applicable]	2013-03-07	-13542	[Not Applicable]	0	1616	[Not Applicable]	HISPANIC OR LATINO	[Not Applicable]	Minimal (T3)	[Not Available]	FEMALE	[Not Available]	[Not Available]|[Not Available]|[Not Available]	[Not Applicable]	Thyroid Papillary Carcinoma - Classical/usual	[Not Applicable]	No	[Not Available]|[Not Available]	[Not Available]|[Not Available]	99 mCi|[Not Available]	Thyroxine withdrawal|[Not Available]	C73	mar-60	C73.9	YES	1	Ultrasound	YES	[Not Available]	[Not Available]	[Not Available]	1.6	4.2	2.5	NO	1	[Not Available]	[Not Applicable]	M0	N1
203	TCGA-EL-A3GU	72	[Not Applicable]	DDE7ADE8-DE24-467F-855D-A422BBEDE407	[Not Available]	[Not Applicable]	[Not Applicable]	[Not Applicable]	[Not Applicable]	2013-03-07	-26632	[Not Applicable]	0	3773	[Not Applicable]	HISPANIC OR LATINO	[Not Applicable]	Minimal (T3)	[Not Available]	FEMALE	NO	[Not Available]|[Not Available]|[Not Available]	[Not Applicable]	Thyroid Papillary Carcinoma - Classical/usual	[Not Applicable]	No	[Not Available]|[Not Available]	[Not Available]|[Not Available]	[Not Available]|[Not Available]	Patient did not receive I-131 treatment|[Not Available]	C73	mar-60	C73.9	YES	23	Ultrasound	YES	Lung	Imaging Suspected	[Not Available]	2.5	5	3.5	YES	10	[Not Available]	[Not Applicable]	M0	N1
204	TCGA-EL-A3GV	65	[Not Applicable]	E95C7F24-89AB-4D56-AAE6-D2268888C549	[Not Available]	[Not Applicable]	[Not Applicable]	[Not Applicable]	[Not Applicable]	2013-03-07	-23787	[Not Applicable]	0	1211	[Not Applicable]	NOT HISPANIC OR LATINO	[Not Applicable]	Minimal (T3)	[Not Available]	FEMALE	[Not Available]	[Not Available]|[Not Available]|[Not Available]	[Not Applicable]	Thyroid Papillary Carcinoma - Classical/usual	[Not Applicable]	No	[Not Available]|[Not Available]	[Not Available]|[Not Available]	100 mCi|[Not Available]	Thyroxine withdrawal|[Not Available]	C73	mar-60	C73.9	YES	1	Ultrasound	YES	[Not Available]	[Not Available]	[Not Available]	1.0	1.9	1.5	NO	0	[Not Available]	[Not Applicable]	M0	N0
205	TCGA-EL-A3GW	37	[Not Applicable]	CA65A38E-8B49-4B50-908A-478B95B95C02	[Not Available]	[Not Applicable]	[Not Applicable]	[Not Applicable]	[Not Applicable]	2013-03-07	-13669	[Not Applicable]	0	1133	[Not Applicable]	HISPANIC OR LATINO	[Not Applicable]	None	[Not Available]	FEMALE	[Not Available]	[Not Available]|[Not Available]|[Not Available]	[Not Applicable]	Thyroid Papillary Carcinoma - Classical/usual	[Not Applicable]	No	[Not Available]|[Not Available]	[Not Available]|[Not Available]	100 mCi|[Not Available]	Thyroxine withdrawal|[Not Available]	C73	mar-60	C73.9	YES	[Not Available]	Ultrasound	YES	[Not Available]	[Not Available]	[Not Available]	1.5	2.5	1.7	NO	[Not Available]	[Not Available]	[Not Applicable]	M0	N0
206	TCGA-EL-A3GX	41	[Not Applicable]	856893D6-0ED7-422B-AC19-1A5871088805	[Not Available]	[Not Applicable]	[Not Applicable]	[Not Applicable]	[Not Applicable]	2013-03-07	-15212	[Not Applicable]	0	2700	[Not Applicable]	NOT HISPANIC OR LATINO	[Not Applicable]	None	[Not Available]	FEMALE	[Not Available]	[Not Available]|[Not Available]|[Not Available]	[Not Applicable]	Thyroid Papillary Carcinoma - Classical/usual	[Not Applicable]	No	[Not Available]|[Not Available]	[Not Available]|[Not Available]	107|[Not Available]	Thyroxine withdrawal|Patient did not receive I-131 treatment	C73	mar-60	C73.9	YES	40	Ultrasound	YES	[Not Available]	[Not Available]	[Not Available]	0.9	1.0	0.9	YES	3	[Not Available]	[Not Applicable]	M0	N1
207	TCGA-EL-A3GY	40	[Not Applicable]	154B4E7F-06F9-4813-BEAB-232227229F8B	[Not Available]	[Not Applicable]	[Not Applicable]	[Not Applicable]	[Not Applicable]	2013-03-07	-14813	[Not Applicable]	0	847	[Not Applicable]	NOT HISPANIC OR LATINO	[Not Applicable]	None	[Not Available]	FEMALE	[Not Available]	[Not Available]|[Not Available]|[Not Available]	[Not Applicable]	Thyroid Papillary Carcinoma - Classical/usual	[Not Applicable]	No	[Not Available]|[Not Available]	[Not Available]|[Not Available]	100 mCi|[Not Available]	Thyroxine withdrawal|[Not Available]	C73	mar-60	C73.9	YES	[Not Available]	Ultrasound	YES	[Not Available]	[Not Available]	[Not Available]	1.8	4.5	2.5	NO	[Not Available]	[Not Available]	[Not Applicable]	M1	N1
208	TCGA-EL-A3H1	66	[Not Applicable]	8D54A2ED-03F1-4A23-BDD2-F3395F5D3716	[Not Available]	[Not Applicable]	[Not Applicable]	[Not Applicable]	[Not Applicable]	2013-03-07	-24328	[Not Applicable]	0	[Not Available]	[Not Applicable]	NOT HISPANIC OR LATINO	[Not Applicable]	None	[Unknown]	FEMALE	[Not Available]	[Not Available]|[Not Available]|[Not Available]	[Not Applicable]	Thyroid Papillary Carcinoma - Classical/usual	[Not Applicable]	No	[Not Available]|[Not Available]	[Not Available]|[Not Available]	100 mCi|[Not Available]	Thyroxine withdrawal|[Not Available]	C73	mar-60	C73.9	YES	[Not Available]	Ultrasound	YES	[Not Available]	[Not Available]	[Not Available]	[Not Available]	[Not Available]	[Not Available]	NO	[Not Available]	[Not Available]	[Not Applicable]	M0	N0
209	TCGA-EL-A3H2	58	[Not Applicable]	77200ABE-4A09-4A4A-BB45-60D9B96D4998	[Not Available]	[Not Applicable]	[Not Applicable]	[Not Applicable]	[Not Applicable]	2013-03-18	-21266	[Not Applicable]	0	[Not Available]	[Not Applicable]	NOT HISPANIC OR LATINO	[Not Applicable]	None	[Not Available]	MALE	[Not Available]	[Not Available]|[Not Available]|[Not Available]	[Not Applicable]	Thyroid Papillary Carcinoma - Classical/usual	[Not Applicable]	Yes	[Not Available]|[Not Available]	[Not Available]|[Not Available]	[Not Available]|[Not Available]	Patient did not receive I-131 treatment|[Not Available]	C73	mar-60	C73.9	YES	[Not Available]	CT with contrast	YES	[Not Available]	[Not Available]	[Not Available]	2.0	6.5	4.5	NO	[Not Available]	[Not Available]	[Not Applicable]	MX	N0
210	TCGA-EL-A3H4	46	[Not Applicable]	E069DCAD-2FD1-464E-A5E9-FE36F05A0446	[Not Available]	[Not Applicable]	[Not Applicable]	[Not Applicable]	[Not Applicable]	2013-03-11	-16943	[Not Applicable]	0	1176	[Not Applicable]	NOT HISPANIC OR LATINO	[Not Applicable]	Moderate/Advanced (T4a)	[Not Available]	FEMALE	[Not Available]	[Not Available]|[Not Available]|[Not Available]	[Not Applicable]	Thyroid Papillary Carcinoma - Classical/usual	[Not Applicable]	No	[Not Available]|[Not Available]	[Not Available]|[Not Available]	150|[Not Available]	Thyroxine withdrawal|[Not Available]	C73	mar-60	C73.9	YES	69	CT with contrast	YES	[Not Available]	[Not Available]	[Not Available]	4.0	8.0	5.0	NO	10	[Not Available]	[Not Applicable]	M0	N1
211	TCGA-EL-A3H5	57	[Not Applicable]	40A9C1D3-6629-4E22-A783-12E0D48349D1	[Not Available]	[Not Applicable]	[Not Applicable]	[Not Applicable]	[Not Applicable]	2013-03-07	-20926	[Not Applicable]	0	1604	[Not Applicable]	NOT HISPANIC OR LATINO	[Not Applicable]	Moderate/Advanced (T4a)	[Not Available]	FEMALE	[Not Available]	[Not Available]|[Not Available]|[Not Available]	[Not Applicable]	Thyroid Papillary Carcinoma - Classical/usual	[Not Applicable]	No	[Not Available]|[Not Available]	[Not Available]|[Not Available]	150 mCi|[Not Available]	Thyroxine withdrawal|[Not Available]	C73	mar-60	C73.9	YES	48	CT without contrast	YES	[Not Available]	[Not Available]	[Not Available]	1.0	2.0	1.0	NO	6	[Not Available]	[Not Applicable]	M0	N1
212	TCGA-EL-A3H7	36	[Not Applicable]	FAA51172-60EC-48D8-9224-36BFDA1D27E0	[Not Available]	[Not Applicable]	[Not Applicable]	[Not Applicable]	[Not Applicable]	2013-03-07	-13407	[Not Applicable]	0	3862	[Not Applicable]	NOT HISPANIC OR LATINO	[Not Applicable]	Minimal (T3)	[Unknown]	FEMALE	[Not Available]	[Not Available]|[Not Available]|[Not Available]	[Not Applicable]	Thyroid Papillary Carcinoma - Classical/usual	[Not Applicable]	No	[Not Available]|[Not Available]	[Not Available]|[Not Available]	[Not Available]|[Not Available]	[Not Available]|[Not Available]	C73	mar-60	C73.9	YES	9	Ultrasound	YES	[Not Available]	[Not Available]	[Not Available]	1.7	3.0	2.6	NO	8	[Not Available]	[Not Applicable]	M0	N1
213	TCGA-EL-A3H8	35	[Not Applicable]	F9DEEDA6-8F81-441A-9C47-24C2EEFD049A	[Not Available]	[Not Applicable]	[Not Applicable]	[Not Applicable]	[Not Applicable]	2013-03-07	-12992	[Not Applicable]	0	3912	[Not Applicable]	NOT HISPANIC OR LATINO	[Not Applicable]	Minimal (T3)	[Not Available]	FEMALE	[Not Available]	[Not Available]|[Not Available]|[Not Available]	[Not Applicable]	Thyroid Papillary Carcinoma - Classical/usual	[Not Applicable]	No	[Not Available]|[Not Available]	[Not Available]|[Not Available]	[Not Available]|[Not Available]	Patient did not receive I-131 treatment|[Not Available]	C73	mar-60	C73.9	YES	44	Ultrasound	YES	[Not Available]	[Not Available]	[Not Available]	1.2	2	1.7	NO	14	[Not Available]	[Not Applicable]	M0	N1
214	TCGA-EL-A3MW	55	[Not Applicable]	EF3DD880-7BE4-46A8-93C2-7CBA1A9CD24D	[Not Available]	[Not Applicable]	[Not Applicable]	[Not Applicable]	[Not Applicable]	2013-03-13	-20185	[Not Applicable]	0	2842	[Not Applicable]	NOT HISPANIC OR LATINO	[Not Applicable]	None	[Not Available]	FEMALE	[Not Available]	[Not Available]|[Not Available]|[Not Available]	[Not Applicable]	Thyroid Papillary Carcinoma - Classical/usual	[Not Applicable]	No	[Not Available]|[Not Available]	[Not Available]|[Not Available]	[Not Available]|[Not Available]	Patient did not receive I-131 treatment|[Not Available]	C73	mar-60	C73.9	YES	1	[Not Available]	NO	[Not Available]	[Not Available]	[Not Available]	1.8	3.5	3.0	NO	0	[Not Available]	[Not Applicable]	M0	N0
215	TCGA-EL-A3MY	81	[Not Applicable]	7746BE87-7AD0-48A7-84FB-08A81B220BDB	[Not Available]	[Not Applicable]	[Not Applicable]	[Not Applicable]	[Not Applicable]	2013-03-14	-29706	[Not Applicable]	0	[Not Available]	[Not Applicable]	NOT HISPANIC OR LATINO	[Not Applicable]	Moderate/Advanced (T4a)	[Not Available]	MALE	[Unknown]	[Not Available]|[Not Available]|[Not Available]	[Not Applicable]	Thyroid Papillary Carcinoma - Classical/usual	[Not Applicable]	No	[Not Available]|[Not Available]	[Not Available]|[Not Available]	[Not Available]|[Not Available]	Patient did not receive I-131 treatment|[Not Available]	C73	mar-60	C73.9	YES	[Not Available]	Ultrasound	YES	Lung	Imaging Suspected	[Not Available]	2.5	4.5	3	NO	[Not Available]	[Not Available]	[Not Applicable]	M1	NX
216	TCGA-EL-A3MZ	66	[Not Applicable]	F82F9AE8-E106-4C61-941C-3614D51B0F41	[Not Available]	[Not Applicable]	[Not Applicable]	[Not Applicable]	[Not Applicable]	2013-03-14	-24208	[Not Applicable]	0	[Not Available]	[Not Applicable]	NOT HISPANIC OR LATINO	[Not Applicable]	Moderate/Advanced (T4a)	[Not Available]	MALE	[Not Available]	[Not Available]|[Not Available]|[Not Available]	[Not Applicable]	Thyroid Papillary Carcinoma - Classical/usual	[Not Applicable]	No	[Not Available]|[Not Available]	[Not Available]|[Not Available]	[Not Available]|[Not Available]	Patient did not receive I-131 treatment|[Not Available]	C73	mar-60	C73.9	YES	2	MRI without contrast	YES	[Not Available]	[Not Available]	[Not Available]	2.0	3.6	2.5	NO	1	[Not Available]	[Not Applicable]	MX	N1
217	TCGA-EL-A3N2	24	[Not Applicable]	34D4CC10-B868-4E85-96A5-8680FC729E34	[Not Available]	[Not Applicable]	[Not Applicable]	[Not Applicable]	[Not Applicable]	2013-03-14	-8988	[Not Applicable]	0	370	[Not Applicable]	NOT HISPANIC OR LATINO	[Not Applicable]	Minimal (T3)	[Not Available]	FEMALE	[Not Available]	[Not Available]|[Not Available]|[Not Available]	[Not Applicable]	Thyroid Papillary Carcinoma - Classical/usual	[Not Applicable]	No	[Not Available]|[Not Available]	[Not Available]|[Not Available]	[Not Available]|[Not Available]	Patient did not receive I-131 treatment|[Not Available]	C73	mar-60	C73.9	YES	27	CT with contrast	YES	[Not Available]	[Not Available]	[Not Available]	1.5	4.5	3.5	NO	5	[Not Available]	[Not Applicable]	M0	N1
218	TCGA-EL-A3N3	53	[Not Applicable]	00A02E62-E1AB-467A-91B3-5F526DD2251A	[Not Available]	[Not Applicable]	[Not Applicable]	[Not Applicable]	[Not Applicable]	2013-03-07	-19512	[Not Applicable]	0	4484	[Not Applicable]	NOT HISPANIC OR LATINO	[Not Applicable]	Minimal (T3)	[Not Available]	FEMALE	[Not Available]	[Not Available]|[Not Available]|[Not Available]	[Not Applicable]	Thyroid Papillary Carcinoma - Classical/usual	[Not Applicable]	No	[Not Available]|[Not Available]	[Not Available]|[Not Available]	100 mCi|[Not Available]	Thyroxine withdrawal|[Not Available]	C73	mar-60	C73.9	YES	[Not Available]	[Not Available]	NO	[Not Available]	[Not Available]	[Not Available]	2.0	6.0	4.5	NO	[Not Available]	[Not Available]	[Not Applicable]	M0	NX
219	TCGA-EL-A3T0	45	[Not Applicable]	861F94CE-45FF-4588-ADDB-E1EA48878C2E	[Not Available]	[Not Applicable]	[Not Applicable]	[Not Applicable]	[Not Applicable]	2013-03-13	-16798	[Not Applicable]	0	3976	[Not Applicable]	NOT HISPANIC OR LATINO	[Not Applicable]	Minimal (T3)	[Not Available]	FEMALE	[Not Available]	[Not Available]|[Not Available]|[Not Available]	[Not Applicable]	Thyroid Papillary Carcinoma - Classical/usual	[Not Applicable]	No	[Not Available]|[Not Available]	[Not Available]|[Not Available]	[Not Available]|[Not Available]	Patient did not receive I-131 treatment|[Not Available]	C73	mar-60	C73.9	YES	21	Ultrasound	YES	[Not Available]	[Not Available]	[Not Available]	[Not Available]	[Not Available]	[Not Available]	NO	10	[Not Available]	[Not Applicable]	M0	N1
220	TCGA-EL-A3T1	38	[Not Applicable]	97D0E1BB-1459-4124-B25A-48195F2AD8B5	[Not Available]	[Not Applicable]	[Not Applicable]	[Not Applicable]	[Not Applicable]	2013-03-13	-14024	[Not Applicable]	0	3941	[Not Applicable]	NOT HISPANIC OR LATINO	[Not Applicable]	Minimal (T3)	[Not Available]	FEMALE	[Not Available]	[Not Available]|[Not Available]|[Not Available]	[Not Applicable]	Thyroid Papillary Carcinoma - Classical/usual	[Not Applicable]	No	[Not Available]|[Not Available]	[Not Available]|[Not Available]	[Not Available]|[Not Available]	Patient did not receive I-131 treatment|[Not Available]	C73	mar-60	C73.9	YES	1	Ultrasound	YES	[Not Available]	[Not Available]	[Not Available]	2.9	3.8	3.0	NO	0	[Not Available]	[Not Applicable]	M0	N0
221	TCGA-EL-A3T2	55	[Not Applicable]	8A476795-0E05-4DA6-BBE1-FF7304DA1B39	[Not Available]	[Not Applicable]	[Not Applicable]	[Not Applicable]	[Not Applicable]	2013-03-13	-20403	[Not Applicable]	0	988	[Not Applicable]	HISPANIC OR LATINO	[Not Applicable]	None	[Not Available]	FEMALE	[Not Available]	[Not Available]|[Not Available]|[Not Available]	[Not Applicable]	Thyroid Papillary Carcinoma - Classical/usual	[Not Applicable]	No	[Not Available]|[Not Available]	[Not Available]|[Not Available]	[Not Available]|[Not Available]	Patient did not receive I-131 treatment|Patient did not receive I-131 treatment	C73	mar-60	C73.9	YES	14	Ultrasound	YES	[Not Available]	[Not Available]	[Not Available]	1.7	3.0	1.5	YES	2	[Not Available]	[Not Applicable]	M0	N1
222	TCGA-EL-A3T3	63	[Not Applicable]	6435EA21-7214-40C5-9CCB-A1F22685A728	[Not Available]	[Not Applicable]	[Not Applicable]	[Not Applicable]	[Not Applicable]	2013-03-13	-23043	[Not Applicable]	0	3556	[Not Applicable]	HISPANIC OR LATINO	[Not Applicable]	None	[Not Available]	MALE	[Not Available]	[Not Available]|[Not Available]|[Not Available]	[Not Applicable]	Thyroid Papillary Carcinoma - Classical/usual	[Not Applicable]	No	[Not Available]|[Not Available]	[Not Available]|[Not Available]	[Not Available]|[Not Available]	Patient did not receive I-131 treatment|[Not Available]	C73	mar-60	C73.9	YES	[Not Available]	Ultrasound	YES	[Not Available]	[Not Available]	[Not Available]	1.5	3.5	3.5	NO	[Not Available]	[Not Available]	[Not Applicable]	M0	N0
223	TCGA-EL-A3T6	34	[Not Applicable]	90507BAA-B716-4BCF-A18E-9D8AE97D809A	[Not Available]	[Not Applicable]	[Not Applicable]	[Not Applicable]	[Not Applicable]	2013-03-13	-12777	[Not Applicable]	0	2987	[Not Applicable]	HISPANIC OR LATINO	[Not Applicable]	None	[Not Available]	FEMALE	[Not Available]	[Not Available]|[Not Available]|[Not Available]	[Not Applicable]	Thyroid Papillary Carcinoma - Classical/usual	[Not Applicable]	No	[Not Available]|[Not Available]	[Not Available]|[Not Available]	[Not Available]|[Not Available]	Patient did not receive I-131 treatment|[Not Available]	C73	mar-60	C73.9	YES	[Not Available]	Ultrasound	YES	[Not Available]	[Not Available]	[Not Available]	3.0	4.5	4.0	NO	[Not Available]	[Not Available]	[Not Applicable]	M0	N0
224	TCGA-EL-A3T7	47	[Not Applicable]	B1640709-8B2F-4CCA-A2C0-55A1B4A1884B	[Not Available]	[Not Applicable]	[Not Applicable]	[Not Applicable]	[Not Applicable]	2013-03-13	-17302	[Not Applicable]	0	1256	[Not Applicable]	NOT HISPANIC OR LATINO	[Not Applicable]	Minimal (T3)	[Not Available]	FEMALE	[Not Available]	[Not Available]|[Not Available]|[Not Available]	[Not Applicable]	Thyroid Papillary Carcinoma - Classical/usual	[Not Applicable]	No	[Not Available]|[Not Available]	[Not Available]|[Not Available]	[Not Available]|[Not Available]	[Not Available]|[Not Available]	C73	mar-60	C73.9	YES	[Not Available]	Ultrasound	YES	[Not Available]	[Not Available]	[Not Available]	1.0	2.0	1.5	NO	[Not Available]	[Not Available]	[Not Applicable]	M0	N0
225	TCGA-EL-A3T8	36	[Not Applicable]	989E9202-C08E-4BBF-85B3-1E278A475CB7	[Not Available]	[Not Applicable]	[Not Applicable]	[Not Applicable]	[Not Applicable]	2013-03-13	-13290	[Not Applicable]	0	2901	[Not Applicable]	NOT HISPANIC OR LATINO	[Not Applicable]	None	[Not Available]	MALE	[Not Available]	[Not Available]|[Not Available]|[Not Available]	[Not Applicable]	Thyroid Papillary Carcinoma - Classical/usual	[Not Applicable]	No	[Not Available]|[Not Available]	[Not Available]|[Not Available]	[Not Available]|[Not Available]	Patient did not receive I-131 treatment|[Not Available]	C73	mar-60	C73.9	YES	[Not Available]	Ultrasound	YES	[Not Available]	[Not Available]	[Not Available]	3.0	3.8	3.0	NO	[Not Available]	[Not Available]	[Not Applicable]	M0	N0
226	TCGA-EL-A3T9	69	[Not Applicable]	8A233B01-2959-467F-8950-02BE16309156	[Not Available]	[Not Applicable]	[Not Applicable]	[Not Applicable]	[Not Applicable]	2013-03-15	-25484	174	0	[Not Available]	[Not Applicable]	NOT HISPANIC OR LATINO	[Not Applicable]	Very Advanced (T4b)	[Not Available]	FEMALE	[Not Available]	[Not Available]|[Not Available]|[Not Available]	[Not Applicable]	Thyroid Papillary Carcinoma - Classical/usual	[Not Applicable]	No	[Not Available]|[Not Available]	[Not Available]|[Not Available]	[Not Available]|[Not Available]	[Unknown]|[Not Available]	C73	mar-60	C73.9	YES	[Not Available]	Ultrasound	YES	[Not Available]	[Not Available]	[Not Available]	2.0	4.0	3.2	NO	[Not Available]	[Not Available]	[Not Applicable]	MX	N1
227	TCGA-EL-A3TA	42	[Not Applicable]	D4355111-3ABB-40F0-BDB7-B9EAA39DC771	[Not Available]	[Not Applicable]	[Not Applicable]	[Not Applicable]	[Not Applicable]	2013-03-13	-15366	[Not Applicable]	0	1650	[Not Applicable]	NOT HISPANIC OR LATINO	[Not Applicable]	None	[Not Available]	MALE	[Not Available]	[Not Available]|[Not Available]|[Not Available]	[Not Applicable]	Thyroid Papillary Carcinoma - Classical/usual	[Not Applicable]	No	[Not Available]|[Not Available]	[Not Available]|[Not Available]	[Not Available]|[Not Available]	Patient did not receive I-131 treatment|[Not Available]	C73	mar-60	C73.9	YES	[Not Available]	Ultrasound	YES	[Not Available]	[Not Available]	[Not Available]	2.0	7.5	3.0	NO	[Not Available]	[Not Available]	[Not Applicable]	M0	N0
228	TCGA-EL-A3TB	47	[Not Applicable]	A09D0BE0-FD41-4B30-B488-9A9F2ABEF8E7	[Not Available]	[Not Applicable]	[Not Applicable]	[Not Applicable]	[Not Applicable]	2013-03-14	-17195	[Not Applicable]	0	2519	[Not Applicable]	NOT HISPANIC OR LATINO	[Not Applicable]	Minimal (T3)	[Not Available]	FEMALE	[Not Available]	[Not Available]|[Not Available]|[Not Available]	[Not Applicable]	Thyroid Papillary Carcinoma - Classical/usual	[Not Applicable]	No	[Not Available]|[Not Available]	[Not Available]|[Not Available]	[Not Available]|[Not Available]	Patient did not receive I-131 treatment|[Not Available]	C73	mar-60	C73.9	YES	20	[Not Available]	NO	[Not Available]	[Not Available]	[Not Available]	1.3	2.2	1.4	NO	7	[Not Available]	[Not Applicable]	M0	N1a
229	TCGA-EL-A3ZG	15	[Not Applicable]	286C69B0-75BA-48D6-A26B-26077F101BBB	v 600 E	[Not Applicable]	[Not Applicable]	[Not Applicable]	[Not Applicable]	2013-03-07	-5612	[Not Applicable]	0	2352	[Not Applicable]	NOT HISPANIC OR LATINO	[Not Applicable]	Minimal (T3)	[Not Available]	MALE	YES	[Not Available]|[Unknown]|[Unknown]	[Not Applicable]	Thyroid Papillary Carcinoma - Classical/usual	[Not Applicable]	No	[Not Available]|[Not Available]	[Not Available]|[Not Available]	100 mCi|[Not Available]	Thyroxine withdrawal|[Not Available]	C73	mar-60	C73.9	YES	[Not Available]	Ultrasound	YES	[Not Available]	[Not Available]	[Not Available]	3.2	6	4	NO	[Not Available]	[Not Available]	[Not Applicable]	M0	N0
230	TCGA-EL-A3ZH	42	[Not Applicable]	149B46A3-75DE-44E1-BA73-BDC4FF379C7F	[Not Available]	[Not Applicable]	[Not Applicable]	[Not Applicable]	[Not Applicable]	2013-03-07	-15685	[Not Applicable]	0	2402	[Not Applicable]	NOT HISPANIC OR LATINO	[Not Applicable]	Minimal (T3)	[Not Available]	FEMALE	[Not Available]	[Not Available]|[Not Available]|[Not Available]	[Not Applicable]	Thyroid Papillary Carcinoma - Classical/usual	[Not Applicable]	No	[Not Available]|[Not Available]	[Not Available]|[Not Available]	109 mCi|[Not Available]	Thyroxine withdrawal|[Not Available]	C73	mar-60	C73.9	YES	8	Ultrasound	YES	[Not Available]	[Not Available]	[Not Available]	1.1	2.5	2	NO	4	[Not Available]	[Not Applicable]	M0	N1
231	TCGA-EL-A3ZK	41	[Not Applicable]	3D8B7654-B403-4360-80DC-8273CA90C2DC	[Not Available]	[Not Applicable]	[Not Applicable]	[Not Applicable]	[Not Applicable]	2013-03-07	-15121	[Not Applicable]	0	957	[Not Applicable]	NOT HISPANIC OR LATINO	[Not Applicable]	None	[Not Available]	FEMALE	[Not Available]	[Not Available]|[Not Available]|[Not Available]	[Not Applicable]	Thyroid Papillary Carcinoma - Classical/usual	[Not Applicable]	No	01/23/2008|[Not Available]	[Not Available]|[Not Available]	115 mCi|[Not Available]	Thyroxine withdrawal|[Not Available]	C73	mar-60	C73.9	YES	16	Ultrasound	YES	[Not Available]	[Not Available]	[Not Available]	1.2	2.4	2.5	NO	2	[Not Available]	[Not Applicable]	M0	N1
232	TCGA-EL-A3ZL	34	[Not Applicable]	E2475D48-628B-4095-B101-865D79A4B0ED	[Not Available]	[Not Applicable]	[Not Applicable]	[Not Applicable]	[Not Applicable]	2013-03-07	-12649	[Not Applicable]	0	1530	[Not Applicable]	NOT HISPANIC OR LATINO	[Not Applicable]	None	[Not Available]	FEMALE	[Not Available]	[Not Available]|[Not Available]|[Not Available]	[Not Applicable]	Thyroid Papillary Carcinoma - Classical/usual	[Not Applicable]	No	[Not Available]|[Not Available]	[Not Available]|[Not Available]	100 mCi|[Not Available]	Thyroxine withdrawal|[Not Available]	C73	mar-60	C73.9	YES	25	Ultrasound	YES	[Not Available]	[Not Available]	[Not Available]	1.4	4	2	NO	7	[Not Available]	[Not Applicable]	M0	N1
233	TCGA-EL-A3ZP	19	[Not Applicable]	EA859A83-00C3-40B2-97C1-FB24AD027EA6	[Not Available]	[Not Applicable]	[Not Applicable]	[Not Applicable]	[Not Applicable]	2013-03-07	-7100	[Not Applicable]	0	1323	[Not Applicable]	NOT HISPANIC OR LATINO	[Not Applicable]	Moderate/Advanced (T4a)	[Not Available]	MALE	[Not Available]	[Not Available]|[Not Available]|[Not Available]	[Not Applicable]	Thyroid Papillary Carcinoma - Classical/usual	[Not Applicable]	No	[Not Available]|[Not Available]	[Not Available]|[Not Available]	150 mCi|[Not Available]	Thyroxine withdrawal|[Not Available]	C73	mar-60	C73.9	YES	47	CT with contrast	YES	[Not Available]	[Not Available]	[Not Available]	1.2	2.6	2.1	NO	9	[Not Available]	[Not Applicable]	M0	N1
234	TCGA-EL-A3ZQ	78	[Not Applicable]	315CBBE8-62C8-488B-92C5-E2046321EFB7	[Not Available]	[Not Applicable]	[Not Applicable]	[Not Applicable]	[Not Applicable]	2013-03-07	-28782	[Not Applicable]	0	1385	[Not Applicable]	NOT HISPANIC OR LATINO	[Not Applicable]	None	[Not Available]	FEMALE	[Not Available]	[Not Available]|[Not Available]|[Not Available]	[Not Applicable]	Thyroid Papillary Carcinoma - Classical/usual	[Not Applicable]	No	[Not Available]|[Not Available]	[Not Available]|[Not Available]	101 mCi|[Not Available]	Thyroxine withdrawal|[Not Available]	C73	mar-60	C73.9	YES	1	Ultrasound	YES	[Not Available]	[Not Available]	[Not Available]	2.0	3.6	2.8	NO	[Not Available]	[Not Available]	[Not Applicable]	M0	N0
235	TCGA-EL-A3ZR	46	[Not Applicable]	96B95A2C-FB4F-4CBA-89E7-A7F0E90DB146	[Not Available]	[Not Applicable]	[Not Applicable]	[Not Applicable]	[Not Applicable]	2013-03-07	-16852	[Not Applicable]	0	1465	[Not Applicable]	NOT HISPANIC OR LATINO	[Not Applicable]	None	[Not Available]	FEMALE	[Not Available]	[Not Available]|[Not Available]|[Not Available]	[Not Applicable]	Thyroid Papillary Carcinoma - Classical/usual	[Not Applicable]	No	[Not Available]|[Not Available]	[Not Available]|[Not Available]	101.2 mCi|[Not Available]	Thyroxine withdrawal|[Not Available]	C73	mar-60	C73.9	YES	[Not Available]	Ultrasound	YES	[Not Available]	[Not Available]	[Not Available]	1.5	2.2	1.5	NO	[Not Available]	[Not Available]	[Not Applicable]	M0	N0
236	TCGA-EL-A3ZS	22	[Not Applicable]	A253B21E-BA9B-4928-95D1-89B59C868794	[Not Available]	[Not Applicable]	[Not Applicable]	[Not Applicable]	[Not Applicable]	2013-03-07	-8076	[Not Applicable]	0	214	[Not Applicable]	NOT HISPANIC OR LATINO	[Not Applicable]	None	[Not Available]	FEMALE	[Not Available]	[Not Available]|[Not Available]|[Not Available]	[Not Applicable]	Thyroid Papillary Carcinoma - Classical/usual	[Not Applicable]	No	[Not Available]|[Not Available]	[Not Available]|[Not Available]	75 mCi|[Not Available]	Thyroxine withdrawal|[Not Available]	C73	mar-60	C73.9	YES	40	Ultrasound	YES	[Not Available]	[Not Available]	[Not Available]	0.7	1.6	1.1	NO	13	[Not Available]	[Not Applicable]	M0	N1
237	TCGA-EL-A3ZT	35	[Not Applicable]	64DE42BD-D134-4F44-82FA-D6614709BF01	[Not Available]	[Not Applicable]	[Not Applicable]	[Not Applicable]	[Not Applicable]	2013-03-07	-13103	[Not Applicable]	0	1357	[Not Applicable]	HISPANIC OR LATINO	[Not Applicable]	Minimal (T3)	[Not Available]	MALE	[Not Available]	[Not Available]|[Not Available]|[Not Available]	[Not Applicable]	Thyroid Papillary Carcinoma - Classical/usual	[Not Applicable]	No	[Not Available]|[Not Available]	[Not Available]|[Not Available]	100 mCi|[Not Available]	Thyroxine withdrawal|[Not Available]	C73	mar-60	C73.9	YES	[Not Available]	Ultrasound	YES	[Not Available]	[Not Available]	[Not Available]	0.9	2.5	1.5	NO	[Not Available]	[Not Available]	[Not Applicable]	M0	N0
238	TCGA-EL-A4JV	41	[Not Applicable]	6F77FC81-1BF4-47C8-B1D8-78BB17CB13F8	[Not Available]	[Not Applicable]	[Not Applicable]	[Not Applicable]	[Not Applicable]	2013-03-14	-15065	[Not Applicable]	0	1393	[Not Applicable]	NOT HISPANIC OR LATINO	[Not Applicable]	None	[Not Available]	FEMALE	[Not Available]	[Not Available]|[Not Available]|[Not Available]	[Not Applicable]	Thyroid Papillary Carcinoma - Classical/usual	[Not Applicable]	No	[Not Available]|[Not Available]	[Not Available]|[Not Available]	[Not Available]|[Not Available]	Patient did not receive I-131 treatment|[Not Available]	C73	mar-60	C73.9	YES	1	Ultrasound	YES	[Not Available]	[Not Available]	[Not Available]	1.8	4.5	2.5	NO	0	[Not Available]	[Not Applicable]	M0	N0
239	TCGA-EL-A4JW	38	[Not Applicable]	4F340C8C-5912-4257-B57D-C096DA254C26	[Not Available]	[Not Applicable]	[Not Applicable]	[Not Applicable]	[Not Applicable]	2013-03-14	-13928	[Not Applicable]	0	586	[Not Applicable]	NOT HISPANIC OR LATINO	[Not Applicable]	None	[Not Available]	FEMALE	[Not Available]	[Not Available]|[Not Available]|[Not Available]	[Not Applicable]	Thyroid Papillary Carcinoma - Classical/usual	[Not Applicable]	No	[Not Available]|[Not Available]	[Not Available]|[Not Available]	[Not Available]|[Not Available]	Patient did not receive I-131 treatment|[Not Available]	C73	mar-60	C73.9	YES	1	Ultrasound	YES	[Not Available]	[Not Available]	[Not Available]	0.6	1.6	1.5	NO	0	[Not Available]	[Not Applicable]	M0	N0
240	TCGA-EL-A4JX	31	[Not Applicable]	6A63961E-6CA4-45FA-93EE-65F7C392FCF0	[Not Available]	[Not Applicable]	[Not Applicable]	[Not Applicable]	[Not Applicable]	2013-03-13	-11464	[Not Applicable]	0	1398	[Not Applicable]	NOT HISPANIC OR LATINO	[Not Applicable]	None	[Unknown]	FEMALE	[Not Available]	[Not Available]|[Not Available]|[Not Available]	[Not Applicable]	Thyroid Papillary Carcinoma - Classical/usual	[Not Applicable]	No	[Not Available]|[Not Available]	[Not Available]|[Not Available]	[Not Available]|[Not Available]	Patient did not receive I-131 treatment|[Not Available]	C73	mar-60	C73.9	YES	1	Ultrasound	YES	[Not Available]	[Not Available]	[Not Available]	2.6	4.0	3.0	NO	0	[Not Available]	[Not Applicable]	MX	N0
241	TCGA-EL-A4JZ	55	[Not Applicable]	3D952B80-501E-41C6-A3AF-0BD6014B81E4	[Not Available]	[Not Applicable]	[Not Applicable]	[Not Applicable]	[Not Applicable]	2013-03-13	-20289	[Not Applicable]	0	1154	[Not Applicable]	NOT HISPANIC OR LATINO	[Not Applicable]	Minimal (T3)	[Not Available]	FEMALE	[Not Available]	[Not Available]|[Not Available]|[Not Available]	[Not Applicable]	Thyroid Papillary Carcinoma - Classical/usual	[Not Applicable]	No	[Not Available]|[Not Available]	[Not Available]|[Not Available]	[Not Available]|[Not Available]	Patient did not receive I-131 treatment|[Not Available]	C73	mar-60	C73.9	YES	23	Ultrasound	YES	[Not Available]	[Not Available]	[Not Available]	1.5	2.0	1.6	NO	6	[Not Available]	[Not Applicable]	M0	N1
242	TCGA-EL-A4K0	54	[Not Applicable]	08293BF4-727D-45C2-ABBF-1AEC3BA1C8A4	[Not Available]	[Not Applicable]	[Not Applicable]	[Not Applicable]	[Not Applicable]	2013-03-14	-20042	[Not Applicable]	0	578	[Not Applicable]	NOT HISPANIC OR LATINO	[Not Applicable]	None	[Unknown]	FEMALE	[Not Available]	[Not Available]|[Not Available]|[Not Available]	[Not Applicable]	Thyroid Papillary Carcinoma - Classical/usual	[Not Applicable]	No	[Not Available]|[Not Available]	[Not Available]|[Not Available]	[Not Available]|[Not Available]	Patient did not receive I-131 treatment|[Not Available]	C73	mar-60	C73.9	YES	1	Ultrasound	YES	[Not Available]	[Not Available]	[Not Available]	1.0	1.1	1.0	NO	0	[Not Available]	[Not Applicable]	M0	N0
243	TCGA-EL-A4K1	68	[Not Applicable]	AA6E3437-EA1C-4BED-AB7D-8F3F89F8CEEB	[Not Available]	[Not Applicable]	[Not Applicable]	[Not Applicable]	[Not Applicable]	2013-03-14	-24846	[Not Applicable]	0	596	[Not Applicable]	NOT HISPANIC OR LATINO	[Not Applicable]	None	[Not Available]	FEMALE	[Not Available]	[Not Available]|[Not Available]|[Not Available]	[Not Applicable]	Thyroid Papillary Carcinoma - Classical/usual	[Not Applicable]	No	[Not Available]|[Not Available]	[Not Available]|[Not Available]	[Not Available]|[Not Available]	Patient did not receive I-131 treatment|[Not Available]	C73	mar-60	C73.9	YES	5	Ultrasound	YES	[Not Available]	[Not Available]	[Not Available]	2	3.4	2.4	NO	3	[Not Available]	[Not Applicable]	M0	N1
244	TCGA-EL-A4K2	43	[Not Applicable]	A3F87411-0A7B-4415-BA17-8EDCC2639F6C	[Not Available]	[Not Applicable]	[Not Applicable]	[Not Applicable]	[Not Applicable]	2013-03-13	-15961	[Not Applicable]	0	594	[Not Applicable]	NOT HISPANIC OR LATINO	[Not Applicable]	None	[Not Available]	FEMALE	[Not Available]	[Not Available]|[Not Available]|[Not Available]	[Not Applicable]	Thyroid Papillary Carcinoma - Classical/usual	[Not Applicable]	No	[Not Available]|[Not Available]	[Not Available]|[Not Available]	[Not Available]|[Not Available]	Patient did not receive I-131 treatment|[Not Available]	C73	mar-60	C73.9	YES	1	Ultrasound	YES	[Not Available]	[Not Available]	[Not Available]	1.5	1.8	1.5	NO	0	[Not Available]	[Not Applicable]	M0	N0
245	TCGA-EL-A4K4	33	[Not Applicable]	29AFB71C-C2CA-499E-B1C7-12758C9B03D6	[Not Available]	[Not Applicable]	[Not Applicable]	[Not Applicable]	[Not Applicable]	2013-03-13	-12368	[Not Applicable]	0	1022	[Not Applicable]	HISPANIC OR LATINO	[Not Applicable]	Minimal (T3)	[Not Available]	FEMALE	[Not Available]	[Not Available]|[Not Available]|[Not Available]	[Not Applicable]	Thyroid Papillary Carcinoma - Classical/usual	[Not Applicable]	No	[Not Available]|[Not Available]	[Not Available]|[Not Available]	[Not Available]|[Not Available]	[Not Available]|[Not Available]	C73	mar-60	C73.9	YES	43	Ultrasound	YES	[Not Available]	[Not Available]	[Not Available]	3.0	4.4	3.8	NO	13	[Not Available]	[Not Applicable]	M0	N1
246	TCGA-EL-A4K6	75	[Not Applicable]	4FC8E011-4433-4537-B03F-457A3A70240F	[Not Available]	[Not Applicable]	[Not Applicable]	[Not Applicable]	[Not Applicable]	2013-03-13	-27416	[Not Applicable]	0	874	[Not Applicable]	NOT HISPANIC OR LATINO	[Not Applicable]	Minimal (T3)	[Not Available]	MALE	[Not Available]	[Not Available]|[Not Available]|[Not Available]	[Not Applicable]	Thyroid Papillary Carcinoma - Classical/usual	[Not Applicable]	No	[Not Available]|[Not Available]	[Not Available]|[Not Available]	[Not Available]|[Not Available]	rhTSH|[Not Available]	C73	mar-60	C73.9	YES	42	Ultrasound	YES	[Not Available]	[Not Available]	[Not Available]	4.1	6.2	5.0	NO	3	[Not Available]	[Not Applicable]	MX	N1
247	TCGA-EL-A4K7	74	[Not Applicable]	DC392A57-2028-4ECA-8BF3-760EC99703EE	[Not Available]	[Not Applicable]	[Not Applicable]	[Not Applicable]	[Not Applicable]	2013-03-13	-27305	[Not Applicable]	0	4	[Not Applicable]	NOT HISPANIC OR LATINO	[Not Applicable]	Minimal (T3)	[Not Available]	MALE	[Not Available]	[Not Available]|[Not Available]|[Not Available]	[Not Applicable]	Thyroid Papillary Carcinoma - Classical/usual	[Not Applicable]	No	[Not Available]|[Not Available]	[Not Available]|[Not Available]	[Not Available]|[Not Available]	[Not Available]|[Not Available]	C73	mar-60	C73.9	YES	1	Ultrasound	YES	[Not Available]	[Not Available]	[Not Available]	1.8	2.5	2.5	NO	0	[Not Available]	[Not Applicable]	M0	N1
248	TCGA-EL-A4K9	68	[Not Applicable]	89F4A6A5-BF9B-4A0E-BACF-8CD715C2CA93	[Not Available]	[Not Applicable]	[Not Applicable]	[Not Applicable]	[Not Applicable]	2013-03-13	-24979	[Not Applicable]	0	1149	[Not Applicable]	NOT HISPANIC OR LATINO	[Not Applicable]	Minimal (T3)	[Not Available]	MALE	[Not Available]	[Not Available]|[Not Available]|[Not Available]	[Not Applicable]	Thyroid Papillary Carcinoma - Classical/usual	[Not Applicable]	No	[Not Available]|[Not Available]	[Not Available]|[Not Available]	[Not Available]|[Not Available]	[Not Available]|[Not Available]	C73	mar-60	C73.9	YES	[Not Available]	Ultrasound	YES	[Not Available]	[Not Available]	[Not Available]	1.5	5.1	3.2	NO	[Not Available]	[Not Available]	[Not Applicable]	M0	N0
249	TCGA-EL-A4KD	41	[Not Applicable]	B4A60A32-2C1B-44FB-92F4-B30F985DC424	[Not Available]	[Not Applicable]	[Not Applicable]	[Not Applicable]	[Not Applicable]	2013-03-13	-15291	[Not Applicable]	0	911	[Not Applicable]	NOT HISPANIC OR LATINO	[Not Applicable]	Minimal (T3)	[Not Available]	MALE	[Not Available]	[Not Available]|[Not Available]|[Not Available]	[Not Applicable]	Thyroid Papillary Carcinoma - Classical/usual	[Not Applicable]	No	[Not Available]|[Not Available]	[Not Available]|[Not Available]	[Not Available]|[Not Available]	Patient did not receive I-131 treatment|[Not Available]	C73	mar-60	C73.9	YES	18	[Unknown]	YES	[Not Available]	[Not Available]	[Not Available]	2.0	4.5	3.5	NO	4	[Not Available]	[Not Applicable]	M0	N1
250	TCGA-EL-A4KG	35	[Not Applicable]	DC5C1A76-30DE-4B30-B397-3AD691C92A86	[Not Available]	[Not Applicable]	[Not Applicable]	[Not Applicable]	[Not Applicable]	2013-03-13	-12978	[Not Applicable]	0	405	[Not Applicable]	NOT HISPANIC OR LATINO	[Not Applicable]	Minimal (T3)	[Not Available]	FEMALE	[Not Available]	[Not Available]|[Not Available]|[Not Available]	[Not Applicable]	Thyroid Papillary Carcinoma - Classical/usual	[Not Applicable]	No	[Not Available]|[Not Available]	[Not Available]|[Not Available]	[Not Available]|[Not Available]	Patient did not receive I-131 treatment|[Not Available]	C73	mar-60	C73.9	YES	1	Ultrasound	YES	[Not Available]	[Not Available]	[Not Available]	1.5	3.5	3.0	NO	0	[Not Available]	[Not Applicable]	M0	N0
251	TCGA-EL-A4KH	36	[Not Applicable]	64131B0B-9F36-44BE-8BEC-92C71EC36343	[Not Available]	[Not Applicable]	[Not Applicable]	[Not Applicable]	[Not Applicable]	2013-03-13	-13275	[Not Applicable]	0	361	[Not Applicable]	NOT HISPANIC OR LATINO	[Not Applicable]	None	[Not Available]	FEMALE	[Not Available]	[Not Available]|[Not Available]|[Not Available]	[Not Applicable]	Thyroid Papillary Carcinoma - Classical/usual	[Not Applicable]	No	[Not Available]|[Not Available]	[Not Available]|[Not Available]	[Not Available]|[Not Available]	Patient did not receive I-131 treatment|[Not Available]	C73	mar-60	C73.9	YES	[Not Available]	Ultrasound	YES	[Not Available]	[Not Available]	[Not Available]	1.5	2.1	1.8	NO	[Not Available]	[Not Available]	[Not Applicable]	M0	N0
252	TCGA-EL-A4KI	63	[Not Applicable]	1BACEBF3-609E-4BB7-BB93-EB217B3A1B5C	[Not Available]	[Not Applicable]	[Not Applicable]	[Not Applicable]	[Not Applicable]	2013-03-14	-23182	[Not Applicable]	0	264	[Not Applicable]	NOT HISPANIC OR LATINO	[Not Applicable]	Minimal (T3)	[Not Available]	MALE	[Not Available]	[Not Available]|[Not Available]|[Not Available]	[Not Applicable]	Thyroid Papillary Carcinoma - Classical/usual	[Not Applicable]	No	[Not Available]|[Not Available]	[Not Available]|[Not Available]	[Not Available]|[Not Available]	Patient did not receive I-131 treatment|[Not Available]	C73	mar-60	C73.9	YES	1	Ultrasound	YES	[Not Available]	[Not Available]	[Not Available]	5	8	6	NO	0	[Not Available]	[Not Applicable]	MX	N0
253	TCGA-EM-A1CS	55	[Not Applicable]	e92bdb0d-969a-4d98-ada8-5dfec68119b5	[Not Available]	[Not Applicable]	[Not Applicable]	[Not Applicable]	[Not Applicable]	2011-04-21	-20269	[Not Applicable]	0	580	[Not Applicable]	[Not Available]	[Not Applicable]	None	[Not Available]	FEMALE	[Not Available]	[Not Available]|[Not Available]|[Not Available]	[Not Applicable]	Thyroid Papillary Carcinoma - Classical/usual	[Not Applicable]	No	[Not Available]	[Not Available]	[Not Available]	[Not Available]	C73	mar-60	C73.9	YES	6	[Not Available]	[Not Available]	[Not Available]	[Not Available]	[Not Available]	1.1	1.3	1.1	[Not Available]	0	[Not Available]	[Not Applicable]	MX	N0
254	TCGA-EM-A1CT	76	[Not Applicable]	290be61a-84ef-4bed-8e37-b432cba6c88e	[Not Available]	[Not Applicable]	[Not Applicable]	[Not Applicable]	[Not Applicable]	2011-04-21	-27942	[Not Applicable]	0	153	[Not Applicable]	[Not Available]	[Not Applicable]	None	[Not Available]	MALE	[Not Available]	[Not Available]|[Not Available]|[Not Available]	[Not Applicable]	Thyroid Papillary Carcinoma - Classical/usual	[Not Applicable]	No	[Not Available]	[Not Available]	[Not Available]	[Not Available]	C73	mar-60	C73.9	YES	22	[Not Available]	[Not Available]	[Not Available]	[Not Available]	[Not Available]	1.5	1.5	1.5	[Not Available]	1	[Not Available]	[Not Applicable]	MX	N1b
255	TCGA-EM-A1CU	31	[Not Applicable]	4e80f403-0e10-4725-854d-f023c12ee1e2	[Not Available]	[Not Applicable]	[Not Applicable]	[Not Applicable]	[Not Applicable]	2011-04-21	-11473	[Not Applicable]	0	214	[Not Applicable]	[Not Available]	[Not Applicable]	None	[Not Available]	MALE	[Not Available]	[Not Available]|[Not Available]|[Not Available]	[Not Applicable]	Thyroid Papillary Carcinoma - Classical/usual	[Not Applicable]	No	[Not Available]	[Not Available]	[Not Available]	[Not Available]	C73	mar-60	C73.9	YES	20	[Not Available]	[Not Available]	[Not Available]	[Not Available]	[Not Available]	2.6	6.5	3.4	[Not Available]	1	[Not Available]	[Not Applicable]	M0	N1a
256	TCGA-EM-A1CV	32	[Not Applicable]	762eddb5-1b47-4b79-b20a-1edfb07c0705	[Not Available]	[Not Applicable]	[Not Applicable]	[Not Applicable]	[Not Applicable]	2011-04-21	-11932	[Not Applicable]	0	365	[Not Applicable]	[Not Available]	[Not Applicable]	None	Sibling	FEMALE	[Not Available]	[Not Available]|[Not Available]|[Not Available]	[Not Applicable]	Thyroid Papillary Carcinoma - Classical/usual	[Not Applicable]	No	[Not Available]	[Not Available]	[Not Available]	[Not Available]	C73	mar-60	C73.9	YES	3	[Not Available]	[Not Available]	[Not Available]	[Not Available]	[Not Available]	0.8	1.1	0.8	[Not Available]	0	[Not Available]	[Not Applicable]	MX	N0
257	TCGA-EM-A1CW	39	[Not Applicable]	22eb9f00-6869-4d8f-b657-dfd64f81e9e9	[Not Available]	[Not Applicable]	[Not Applicable]	[Not Applicable]	[Not Applicable]	2011-04-21	-14274	[Not Applicable]	0	245	[Not Applicable]	[Not Available]	[Not Applicable]	None	[Not Available]	FEMALE	[Not Available]	[Not Available]|[Not Available]|[Not Available]	[Not Applicable]	Thyroid Papillary Carcinoma - Follicular (>= 99% follicular patterned)	[Not Applicable]	No	[Not Available]	[Not Available]	[Not Available]	[Not Available]	C73	30-wrz	C73.9	YES	1	[Not Available]	[Not Available]	[Not Available]	[Not Available]	[Not Available]	2.0	4.5	2.7	[Not Available]	0	[Not Available]	[Not Applicable]	MX	N0
258	TCGA-EM-A1YA	74	[Not Applicable]	567e4d90-5c5a-44f0-a462-90c831f3c096	[Not Available]	[Not Applicable]	[Not Applicable]	[Not Applicable]	[Not Applicable]	2011-07-28	-27223	[Not Applicable]	0	217	[Not Applicable]	[Not Available]	[Not Applicable]	None	[Not Available]	FEMALE	NO	[Not Evaluated]|[Not Evaluated]|[Not Evaluated]	[Not Applicable]	Thyroid Papillary Carcinoma - Follicular (>= 99% follicular patterned)	[Not Applicable]	No	[Not Available]	[Not Available]	[Not Available]	[Not Available]	C73	mar-60	C73.9	YES	0	Ultrasound	YES	[Not Available]	[Not Available]	[Not Available]	2.8	3.7	3.6	[Not Available]	0	[Not Available]	[Not Applicable]	MX	NX
259	TCGA-EM-A1YB	73	[Not Applicable]	b43a4f92-7a13-4558-a97e-7b3feb2d70c9	[Not Available]	[Not Applicable]	[Not Applicable]	[Not Applicable]	[Not Applicable]	2011-07-28	-26851	[Not Applicable]	0	284	[Not Applicable]	[Not Available]	[Not Applicable]	None	[Not Available]	FEMALE	NO	[Not Evaluated]|[Not Evaluated]|[Not Evaluated]	[Not Applicable]	Thyroid Papillary Carcinoma - Follicular (>= 99% follicular patterned)	[Not Applicable]	No	[Not Available]	[Not Available]	[Not Available]	[Not Available]	C73	mar-60	C73.9	YES	0	[Not Available]	NO	[Not Available]	[Not Available]	[Not Available]	2	2.7	2.6	[Not Available]	0	[Not Available]	[Not Applicable]	MX	NX
260	TCGA-EM-A1YC	71	[Not Applicable]	0ad2a2b3-c1bb-4597-b28e-a6385f93d09c	[Not Available]	[Not Applicable]	[Not Applicable]	[Not Applicable]	[Not Applicable]	2011-07-28	-26142	[Not Applicable]	0	1421	[Not Applicable]	[Not Available]	[Not Applicable]	None	[Not Available]	FEMALE	NO	[Not Evaluated]|[Not Evaluated]|[Not Evaluated]	[Not Applicable]	Thyroid Papillary Carcinoma - Follicular (>= 99% follicular patterned)	[Not Applicable]	No	[Not Available]	[Not Available]	[Not Available]	[Not Available]	C73	mar-60	C73.9	YES	1	CT with contrast	YES	[Not Available]	[Not Available]	[Not Available]	2.0	6.1	4.8	[Not Available]	0	[Not Available]	[Not Applicable]	MX	N0
261	TCGA-EM-A1YD	53	[Not Applicable]	8a3659a8-2a85-4bab-8bf3-55795922474c	[Not Available]	[Not Applicable]	[Not Applicable]	[Not Applicable]	[Not Applicable]	2011-07-28	-19366	[Not Applicable]	0	1209	[Not Applicable]	[Not Available]	[Not Applicable]	None	[Not Available]	FEMALE	NO	[Not Evaluated]|[Not Evaluated]|[Not Evaluated]	[Not Applicable]	Thyroid Papillary Carcinoma - Follicular (>= 99% follicular patterned)	[Not Applicable]	No	[Not Available]	[Not Available]	[Not Available]	[Not Available]	C73	mar-40	C73.9	YES	5	[Not Available]	NO	[Not Available]	[Not Available]	[Not Available]	1.8	3.7	2.6	[Not Available]	0	[Not Available]	[Not Applicable]	MX	N0
262	TCGA-EM-A1YE	47	[Not Applicable]	e632b443-cf6a-4592-96c6-c3493ec86fea	[Not Available]	[Not Applicable]	[Not Applicable]	[Not Applicable]	[Not Applicable]	2011-07-28	-17296	[Not Applicable]	0	650	[Not Applicable]	[Not Available]	[Not Applicable]	None	[Not Available]	FEMALE	NO	[Not Available]|[Not Available]|[Not Available]	[Not Applicable]	Thyroid Papillary Carcinoma - Follicular (>= 99% follicular patterned)	[Not Applicable]	No	[Not Available]	[Not Available]	[Not Available]	[Not Available]	C73	mar-40	C73.9	YES	3	CT with contrast	YES	[Not Available]	[Not Available]	[Not Available]	2	3	2.5	[Not Available]	0	[Not Available]	[Not Applicable]	MX	N0
263	TCGA-EM-A22I	52	[Not Applicable]	EF306507-F426-499E-8A1F-3401A522FB6B	[Not Available]	[Not Applicable]	[Not Applicable]	[Not Applicable]	[Not Applicable]	2011-09-30	-19003	[Not Applicable]	0	81	[Not Applicable]	[Not Available]	[Not Applicable]	Minimal (T3)	[Not Available]	FEMALE	NO	[Not Evaluated]|[Not Evaluated]|[Not Evaluated]	[Not Applicable]	Thyroid Papillary Carcinoma - Classical/usual	[Not Applicable]	No	[Not Available]	[Not Available]	[Not Available]	[Not Available]	C73	mar-50	C73.9	YES	1	[Not Available]	NO	[Not Available]	[Not Available]	[Not Available]	1.6	2.1	2.1	[Not Available]	0	[Not Available]	[Not Applicable]	MX	N0
264	TCGA-EM-A22J	56	[Not Applicable]	C53167D4-14DA-40CC-B30A-35EB3967B8DF	[Not Available]	[Not Applicable]	[Not Applicable]	[Not Applicable]	[Not Applicable]	2011-09-30	-20539	[Not Applicable]	0	207	[Not Applicable]	[Not Available]	[Not Applicable]	None	[Not Available]	FEMALE	NO	[Not Evaluated]|[Not Evaluated]|[Not Evaluated]	[Not Applicable]	Thyroid Papillary Carcinoma - Follicular (>= 99% follicular patterned)	[Not Applicable]	No	[Not Available]	[Not Available]	[Not Available]	[Not Available]	C73	mar-40	C73.9	YES	1	[Not Available]	NO	[Not Available]	[Not Available]	[Not Available]	2.5	2.5	2.5	[Not Available]	0	[Not Available]	[Not Applicable]	MX	N0
265	TCGA-EM-A22K	46	[Not Applicable]	DE9315B3-B3DF-45F0-ADC2-69AA6B8FF717	[Not Available]	[Not Applicable]	[Not Applicable]	[Not Applicable]	[Not Applicable]	2011-09-30	-16890	[Not Applicable]	0	202	[Not Applicable]	[Not Available]	[Not Applicable]	None	[Not Available]	FEMALE	NO	[Not Evaluated]|[Not Evaluated]|[Not Evaluated]	[Not Applicable]	Thyroid Papillary Carcinoma - Classical/usual	[Not Applicable]	No	[Not Available]	[Not Available]	[Not Available]	[Not Available]	C73	mar-40	C73.9	YES	83	CT with contrast	YES	[Not Available]	[Not Available]	[Not Available]	0.6	1.1	0.8	[Not Available]	10	[Not Available]	[Not Applicable]	MX	N1b
266	TCGA-EM-A22L	33	[Not Applicable]	AABC7724-71C8-4C1B-A54B-22E88DDE148F	[Not Available]	[Not Applicable]	[Not Applicable]	[Not Applicable]	[Not Applicable]	2011-09-30	-12092	[Not Applicable]	0	138	[Not Applicable]	[Not Available]	[Not Applicable]	None	[Not Available]	FEMALE	NO	[Not Evaluated]|[Not Evaluated]|[Not Evaluated]	[Not Applicable]	Thyroid Papillary Carcinoma - Follicular (>= 99% follicular patterned)	[Not Applicable]	No	[Not Available]	[Not Available]	[Not Available]	[Not Available]	C73	mar-40	C73.9	YES	1	Ultrasound	YES	[Not Available]	[Not Available]	[Not Available]	1.5	2.2	2.1	[Not Available]	0	[Not Available]	[Not Applicable]	MX	N0
268	TCGA-EM-A22N	68	[Not Applicable]	C63936DD-39FD-41FA-A9F6-18B18303EF05	[Not Available]	[Not Applicable]	[Not Applicable]	[Not Applicable]	[Not Applicable]	2011-09-30	-25035	[Not Applicable]	0	209	[Not Applicable]	[Not Available]	[Not Applicable]	None	[Not Available]	FEMALE	NO	[Not Evaluated]|[Not Evaluated]|[Not Evaluated]	[Not Applicable]	Thyroid Papillary Carcinoma - Follicular (>= 99% follicular patterned)	[Not Applicable]	No	[Not Available]	[Not Available]	[Not Available]	[Not Available]	C73	mar-40	C73.9	YES	2	[Not Available]	NO	[Not Available]	[Not Available]	[Not Available]	1.2	2.0	1.4	[Not Available]	0	[Not Available]	[Not Applicable]	MX	N0
269	TCGA-EM-A22O	75	[Not Applicable]	6ABC861A-376D-446B-ACEE-FB0F03A82C09	[Not Available]	[Not Applicable]	[Not Applicable]	[Not Applicable]	[Not Applicable]	2011-09-30	-27758	[Not Applicable]	0	189	[Not Applicable]	[Not Available]	[Not Applicable]	Moderate/Advanced (T4a)	[Not Available]	MALE	NO	[Not Evaluated]|[Not Evaluated]|[Not Evaluated]	[Not Applicable]	Thyroid Papillary Carcinoma - Classical/usual	[Not Applicable]	No	[Not Available]	[Not Available]	[Not Available]	[Not Available]	C73	mar-60	C73.9	YES	1	CT without contrast	YES	[Not Available]	[Not Available]	[Not Available]	3.5	6.6	4.2	[Not Available]	1	[Not Available]	[Not Applicable]	MX	N1a
270	TCGA-EM-A22P	64	[Not Applicable]	1A4164D9-4484-452D-9382-8CBF896A870E	[Not Available]	[Not Applicable]	[Not Applicable]	[Not Applicable]	[Not Applicable]	2011-09-30	-23723	[Not Applicable]	0	174	[Not Applicable]	[Not Available]	[Not Applicable]	None	[Not Available]	MALE	NO	[Not Evaluated]|[Not Evaluated]|[Not Evaluated]	[Not Applicable]	Thyroid Papillary Carcinoma - Classical/usual	[Not Applicable]	No	[Not Available]	[Not Available]	[Not Available]	[Not Available]	C73	mar-60	C73.9	YES	28	[Not Available]	NO	[Not Available]	[Not Available]	[Not Available]	0.4	1.2	0.5	[Not Available]	14	[Not Available]	[Not Applicable]	MX	N1b
271	TCGA-EM-A22Q	36	[Not Applicable]	8492820D-B619-4A74-95D3-EB574067F3F3	[Not Available]	[Not Applicable]	[Not Applicable]	[Not Applicable]	[Not Applicable]	2011-09-30	-13341	[Not Applicable]	0	192	[Not Applicable]	[Not Available]	[Not Applicable]	None	[Not Available]	MALE	NO	[Not Evaluated]|[Not Evaluated]|[Not Evaluated]	[Not Applicable]	Thyroid Papillary Carcinoma - Follicular (>= 99% follicular patterned)	[Not Applicable]	No	[Not Available]	[Not Available]	[Not Available]	[Not Available]	C73	mar-40	C73.9	YES	9	Ultrasound|CT without contrast	YES	[Not Available]	[Not Available]	[Not Available]	2.4	5.4	4.0	[Not Available]	0	[Not Available]	[Not Applicable]	MX	N0
272	TCGA-EM-A2CJ	49	[Not Applicable]	DC2BECE1-1FCD-467A-8476-DA171D56488C	[Not Available]	[Not Applicable]	[Not Applicable]	[Not Applicable]	[Not Applicable]	2011-12-29	-18167	[Not Applicable]	0	348	[Not Applicable]	[Not Available]	[Not Applicable]	None	[Not Available]	FEMALE	NO	[Not Available]|[Not Available]|[Not Available]	[Not Applicable]	Thyroid Papillary Carcinoma - Follicular (>= 99% follicular patterned)	[Not Applicable]	No	[Not Available]	[Not Available]	[Not Available]	[Not Available]	C73	mar-40	C73.9	YES	0	[Not Available]	NO	[Not Available]	[Not Available]	[Not Available]	0	1.2	1.0	[Not Available]	[Not Available]	[Not Available]	[Not Applicable]	MX	NX
273	TCGA-EM-A2CK	28	[Not Applicable]	7802140A-E518-4AE6-9BD1-C26D80B14AB1	[Not Available]	[Not Applicable]	[Not Applicable]	[Not Applicable]	[Not Applicable]	2011-12-29	-10485	[Not Applicable]	0	249	[Not Applicable]	[Not Available]	[Not Applicable]	None	[Not Available]	MALE	NO	[Not Available]|[Not Available]|[Not Available]	[Not Applicable]	Thyroid Papillary Carcinoma - Follicular (>= 99% follicular patterned)	[Not Applicable]	No	[Not Available]	[Not Available]	[Not Available]	[Not Available]	C73	mar-40	C73.9	YES	25	Ultrasound	YES	[Not Available]	[Not Available]	[Not Available]	1.5	2.3	1.7	[Not Available]	6	[Not Available]	[Not Applicable]	MX	N1b
274	TCGA-EM-A2CL	31	[Not Applicable]	286DE8CD-7222-4F85-A370-79A7903EDF45	[Not Available]	[Not Applicable]	[Not Applicable]	[Not Applicable]	[Not Applicable]	2011-12-29	-11649	[Not Applicable]	0	209	[Not Applicable]	[Not Available]	[Not Applicable]	None	[Not Available]	MALE	NO	[Not Available]|[Not Available]|[Not Available]	[Not Applicable]	Thyroid Papillary Carcinoma - Follicular (>= 99% follicular patterned)	[Not Applicable]	No	[Not Available]	[Not Available]	[Not Available]	[Not Available]	C73	mar-40	C73.9	YES	0	Ultrasound	YES	[Not Available]	[Not Available]	[Not Available]	1.8	2.5	2.3	[Not Available]	[Not Available]	[Not Available]	[Not Applicable]	MX	NX
275	TCGA-EM-A2CM	62	[Not Applicable]	2ACB6F29-06D3-48D4-8553-A9F5839AFE22	[Not Available]	[Not Applicable]	[Not Applicable]	[Not Applicable]	[Not Applicable]	2011-12-29	-22726	[Not Applicable]	0	357	[Not Applicable]	[Not Available]	[Not Applicable]	None	[Not Available]	FEMALE	NO	[Not Available]|[Not Available]|[Not Available]	[Not Applicable]	Other specify	Poorly Differentiated Oncocytic Carcinoma	No	[Not Available]	[Not Available]	[Not Available]	[Not Available]	C73	10-mar	C73.9	YES	3	CT with contrast	YES	[Not Available]	[Not Available]	[Not Available]	3.9	9.6	7.2	[Not Available]	0	[Not Available]	[Not Applicable]	MX	N0
276	TCGA-EM-A2CN	62	[Not Applicable]	4AED5116-D27B-4911-B310-05C2248B861F	[Not Available]	[Not Applicable]	[Not Applicable]	[Not Applicable]	[Not Applicable]	2011-12-29	-22817	[Not Applicable]	0	344	[Not Applicable]	[Not Available]	[Not Applicable]	None	[Not Available]	MALE	NO	[Not Available]|[Not Available]|[Not Available]	[Not Applicable]	Thyroid Papillary Carcinoma - Follicular (>= 99% follicular patterned)	[Not Applicable]	No	[Not Available]	[Not Available]	[Not Available]	[Not Available]	C73	mar-40	C73.9	YES	3	CT with contrast	YES	Bone	Biopsy Proven	[Not Available]	4.0	6.0	4.5	[Not Available]	0	[Not Available]	[Not Applicable]	M1	N0
277	TCGA-EM-A2CO	77	[Not Applicable]	04AE6B65-8514-47FA-B573-EC1E067FF116	[Not Available]	[Not Applicable]	[Not Applicable]	[Not Applicable]	[Not Applicable]	2011-12-29	-28424	[Not Applicable]	0	183	[Not Applicable]	[Not Available]	[Not Applicable]	None	[Not Available]	FEMALE	NO	[Not Available]|[Not Available]|[Not Available]	[Not Applicable]	Thyroid Papillary Carcinoma - Follicular (>= 99% follicular patterned)	[Not Applicable]	No	[Not Available]	[Not Available]	[Not Available]	[Not Available]	C73	mar-42	C73.9	YES	0	Ultrasound	YES	[Not Available]	[Not Available]	[Not Available]	1.4	2.9	2.1	[Not Available]	[Not Available]	[Not Available]	[Not Applicable]	MX	NX
278	TCGA-EM-A2CP	26	[Not Applicable]	2F59F12D-CA0C-4AC6-9718-98A6D455AF46	[Not Available]	[Not Applicable]	[Not Applicable]	[Not Applicable]	[Not Applicable]	2011-12-29	-9759	[Not Applicable]	0	90	[Not Applicable]	[Not Available]	[Not Applicable]	None	[Not Available]	FEMALE	NO	[Not Available]|[Not Available]|[Not Available]	[Not Applicable]	Thyroid Papillary Carcinoma - Follicular (>= 99% follicular patterned)	[Not Applicable]	No	[Not Available]	[Not Available]	[Not Available]	[Not Available]	C73	mar-40	C73.9	YES	27	Ultrasound	YES	[Not Available]	[Not Available]	[Not Available]	2.2	3.2	3.0	[Not Available]	0	[Not Available]	[Not Applicable]	MX	N0
279	TCGA-EM-A2CQ	40	[Not Applicable]	7244B7DB-8282-43AA-A4B4-AD6AF972CF9B	[Not Available]	[Not Applicable]	[Not Applicable]	[Not Applicable]	[Not Applicable]	2011-12-29	-14776	[Not Applicable]	0	199	[Not Applicable]	[Not Available]	[Not Applicable]	None	[Not Available]	FEMALE	NO	[Not Available]|[Not Available]|[Not Available]	[Not Applicable]	Thyroid Papillary Carcinoma - Follicular (>= 99% follicular patterned)	[Not Applicable]	No	[Not Available]	[Not Available]	[Not Available]	[Not Available]	C73	mar-40	C73.9	YES	3	CT with contrast	YES	[Not Available]	[Not Available]	[Not Available]	1.5	1.8	1.5	[Not Available]	1	[Not Available]	[Not Applicable]	MX	N1a
280	TCGA-EM-A2CR	46	[Not Applicable]	212B2002-1EBF-47DD-82F8-6C0B904CF909	[Not Available]	[Not Applicable]	[Not Applicable]	[Not Applicable]	[Not Applicable]	2011-12-29	-16807	[Not Applicable]	0	218	[Not Applicable]	[Not Available]	[Not Applicable]	None	[Not Available]	FEMALE	NO	[Not Available]|[Not Available]|[Not Available]	[Not Applicable]	Thyroid Papillary Carcinoma - Follicular (>= 99% follicular patterned)	[Not Applicable]	No	[Not Available]	[Not Available]	[Not Available]	[Not Available]	C73	mar-40	C73.9	YES	3	Ultrasound	YES	[Not Available]	[Not Available]	[Not Available]	2.2	2.6	2.4	[Not Available]	0	[Not Available]	[Not Applicable]	MX	N0
281	TCGA-EM-A2CS	52	[Not Applicable]	7555E736-A9E2-4B96-A633-FB0F7224D62C	[Not Available]	[Not Applicable]	[Not Applicable]	[Not Applicable]	[Not Applicable]	2011-12-29	-19019	[Not Applicable]	0	284	[Not Applicable]	[Not Available]	[Not Applicable]	None	Sibling	FEMALE	NO	[Not Available]|[Not Available]|[Not Available]	[Not Applicable]	Thyroid Papillary Carcinoma - Classical/usual	[Not Applicable]	No	[Not Available]	[Not Available]	[Not Available]	[Not Available]	C73	mar-42	C73.9	YES	49	CT with contrast	YES	[Not Available]	[Not Available]	[Not Available]	1.3	6.3	3.6	[Not Available]	35	[Not Available]	[Not Applicable]	MX	N1b
282	TCGA-EM-A2CT	20	[Not Applicable]	C8703A65-816B-4F6E-BB15-53DCB3288F66	[Not Available]	[Not Applicable]	[Not Applicable]	[Not Applicable]	[Not Applicable]	2011-12-29	-7558	[Not Applicable]	0	319	[Not Applicable]	[Not Available]	[Not Applicable]	None	[Not Available]	FEMALE	NO	[Not Available]|[Not Available]|[Not Available]	[Not Applicable]	Thyroid Papillary Carcinoma - Follicular (>= 99% follicular patterned)	[Not Applicable]	No	[Not Available]	[Not Available]	[Not Available]	[Not Available]	C73	mar-42	C73.9	YES	5	[Not Available]	NO	[Not Available]	[Not Available]	[Not Available]	0.7	1.1	0.7	[Not Available]	0	[Not Available]	[Not Applicable]	MX	N0
283	TCGA-EM-A2CU	47	[Not Applicable]	667EB7F6-1D36-49BB-9D7B-C9D167B64619	[Not Available]	[Not Applicable]	[Not Applicable]	[Not Applicable]	[Not Applicable]	2011-12-29	-17231	[Not Applicable]	0	176	[Not Applicable]	[Not Available]	[Not Applicable]	None	[Not Available]	FEMALE	NO	[Not Available]|[Not Available]|[Not Available]	[Not Applicable]	Thyroid Papillary Carcinoma - Follicular (>= 99% follicular patterned)	[Not Applicable]	No	[Not Available]	[Not Available]	[Not Available]	[Not Available]	C73	mar-40	C73.9	YES	30	CT with contrast	YES	[Not Available]	[Not Available]	[Not Available]	1.7	4.0	2.8	[Not Available]	4	[Not Available]	[Not Applicable]	MX	N1a
284	TCGA-EM-A2OV	64	[Not Applicable]	55E03FFC-F006-4EC8-8E5D-A738FF091F8A	[Not Available]	[Not Applicable]	[Not Applicable]	[Not Applicable]	[Not Applicable]	2012-03-13	-23656	[Not Applicable]	0	353	[Not Applicable]	[Not Available]	[Not Applicable]	None	[Not Available]	FEMALE	NO	[Not Evaluated]|[Not Evaluated]|[Not Evaluated]	[Not Applicable]	Thyroid Papillary Carcinoma - Follicular (>= 99% follicular patterned)	[Not Applicable]	No	[Not Available]	[Not Available]	[Not Available]	[Not Available]	C73	mar-40	C73.9	YES	1	Ultrasound	YES	[Not Available]	[Not Available]	[Not Available]	[Not Available]	2.1	1.5	[Not Available]	0	[Not Available]	[Not Applicable]	MX	N0
285	TCGA-EM-A2OW	37	[Not Applicable]	A65EC434-9AE0-453F-B440-08BF25558FD1	[Not Available]	[Not Applicable]	[Not Applicable]	[Not Applicable]	[Not Applicable]	2012-03-13	-13761	[Not Applicable]	0	219	[Not Applicable]	[Not Available]	[Not Applicable]	None	[Not Available]	FEMALE	NO	[Not Evaluated]|[Not Evaluated]|[Not Evaluated]	[Not Applicable]	Thyroid Papillary Carcinoma - Follicular (>= 99% follicular patterned)	[Not Applicable]	No	[Not Available]	[Not Available]	[Not Available]	[Not Available]	C73	mar-40	C73.9	YES	0	[Not Available]	NO	[Not Available]	[Not Available]	[Not Available]	1.0	1.3	1.2	[Not Available]	0	[Not Available]	[Not Applicable]	MX	NX
286	TCGA-EM-A2OX	46	[Not Applicable]	98A08015-9040-4E0B-BCFA-2C6DB7D0F888	[Not Available]	[Not Applicable]	[Not Applicable]	[Not Applicable]	[Not Applicable]	2012-03-13	-16910	[Not Applicable]	0	88	[Not Applicable]	[Not Available]	[Not Applicable]	None	Parent	MALE	NO	[Not Evaluated]|[Not Evaluated]|[Not Evaluated]	[Not Applicable]	Thyroid Papillary Carcinoma - Classical/usual	[Not Applicable]	No	[Not Available]	[Not Available]	[Not Available]	[Not Available]	C73	mar-60	C73.9	YES	9	Ultrasound	YES	[Not Available]	[Not Available]	[Not Available]	1.4	1.8	1.5	[Not Available]	8	[Not Available]	[Not Applicable]	MX	N1b
287	TCGA-EM-A2OY	46	[Not Applicable]	D3E75FB4-FB7C-4EBF-9C75-2BE9FFD9F52D	[Not Available]	[Not Applicable]	[Not Applicable]	[Not Applicable]	[Not Applicable]	2012-03-13	-17075	[Not Applicable]	0	347	[Not Applicable]	[Not Available]	[Not Applicable]	None	[Not Available]	FEMALE	NO	[Not Evaluated]|[Not Evaluated]|[Not Evaluated]	[Not Applicable]	Thyroid Papillary Carcinoma - Follicular (>= 99% follicular patterned)	[Not Applicable]	No	[Not Available]	[Not Available]	[Not Available]	[Not Available]	C73	mar-40	C73.9	YES	1	[Not Available]	NO	[Not Available]	[Not Available]	[Not Available]	1.9	2.6	2.6	[Not Available]	0	[Not Available]	[Not Applicable]	MX	N0
288	TCGA-EM-A2OZ	66	[Not Applicable]	1F6BE7CA-76FD-4509-99A6-DFA59B0AC51F	[Not Available]	[Not Applicable]	[Not Applicable]	[Not Applicable]	[Not Applicable]	2012-03-13	-24195	[Not Applicable]	0	284	[Not Applicable]	[Not Available]	[Not Applicable]	None	[Not Available]	MALE	NO	[Not Evaluated]|[Not Evaluated]|[Not Evaluated]	[Not Applicable]	Thyroid Papillary Carcinoma - Classical/usual	[Not Applicable]	No	[Not Available]	[Not Available]	[Not Available]	[Not Available]	C73	mar-60	C73.9	YES	2	CT with contrast	YES	[Not Available]	[Not Available]	[Not Available]	[Not Available]	1.7	[Not Available]	[Not Available]	0	[Not Available]	[Not Applicable]	MX	N0
289	TCGA-EM-A2P0	33	[Not Applicable]	80420C04-709B-4AB2-A88C-1E22B3A09B9C	[Not Available]	[Not Applicable]	[Not Applicable]	[Not Applicable]	[Not Applicable]	2012-03-13	-12126	[Not Applicable]	0	191	[Not Applicable]	[Not Available]	[Not Applicable]	None	Parent	MALE	NO	[Not Evaluated]|[Not Evaluated]|[Not Evaluated]	[Not Applicable]	Thyroid Papillary Carcinoma - Classical/usual	[Not Applicable]	No	[Not Available]	[Not Available]	[Not Available]	[Not Available]	C73	mar-60	C73.9	YES	34	CT with contrast	YES	[Not Available]	[Not Available]	[Not Available]	1.3	2.1	1.8	[Not Available]	9	[Not Available]	[Not Applicable]	MX	N1b
290	TCGA-EM-A2P1	33	[Not Applicable]	9B6ACC25-447D-4144-B4C0-EF52B8850D96	[Not Available]	[Not Applicable]	[Not Applicable]	[Not Applicable]	[Not Applicable]	2012-03-13	-12320	[Not Applicable]	0	194	[Not Applicable]	[Not Available]	[Not Applicable]	None	[Not Available]	MALE	NO	[Not Evaluated]|[Not Evaluated]|[Not Evaluated]	[Not Applicable]	Thyroid Papillary Carcinoma - Classical/usual	[Not Applicable]	No	[Not Available]	[Not Available]	[Not Available]	[Not Available]	C73	mar-60	C73.9	YES	54	Ultrasound	YES	[Not Available]	[Not Available]	[Not Available]	0.9	3.1	1.5	[Not Available]	15	[Not Available]	[Not Applicable]	MX	N1b
291	TCGA-EM-A2P2	46	[Not Applicable]	B9E6A966-DA7C-46F3-825F-8E19C06518C3	[Not Available]	[Not Applicable]	[Not Applicable]	[Not Applicable]	[Not Applicable]	2012-03-13	-16894	[Not Applicable]	0	224	[Not Applicable]	[Not Available]	[Not Applicable]	None	[Not Available]	MALE	NO	[Not Evaluated]|[Not Evaluated]|[Not Evaluated]	[Not Applicable]	Thyroid Papillary Carcinoma - Follicular (>= 99% follicular patterned)	[Not Applicable]	No	[Not Available]	[Not Available]	[Not Available]	[Not Available]	C73	mar-60	C73.9	YES	5	CT with contrast	YES	[Not Available]	[Not Available]	[Not Available]	2.5	5.0	4.5	[Not Available]	0	[Not Available]	[Not Applicable]	MX	N0
292	TCGA-EM-A2P3	47	[Not Applicable]	C9DC11AD-D3F5-4CDF-9C26-7139580B59AF	[Not Available]	[Not Applicable]	[Not Applicable]	[Not Applicable]	[Not Applicable]	2012-03-13	-17495	[Not Applicable]	0	10	[Not Applicable]	[Not Available]	[Not Applicable]	None	[Not Available]	FEMALE	NO	[Not Evaluated]|[Not Evaluated]|[Not Evaluated]	[Not Applicable]	Thyroid Papillary Carcinoma - Classical/usual	[Not Applicable]	No	[Not Available]	[Not Available]	[Not Available]	[Not Available]	C73	mar-60	C73.9	YES	0	Ultrasound	YES	[Not Available]	[Not Available]	[Not Available]	0.9	1.4	1.0	[Not Available]	0	[Not Available]	[Not Applicable]	MX	NX
293	TCGA-EM-A3AI	68	[Not Applicable]	6A87BBC4-6161-4FC6-B4DF-518D7831F4D2	[Not Available]	[Not Applicable]	[Not Applicable]	[Not Applicable]	[Not Applicable]	2012-04-23	-24974	[Not Applicable]	0	201	[Not Applicable]	[Not Available]	[Not Applicable]	None	[Not Available]	FEMALE	NO	[Not Evaluated]|[Not Evaluated]|[Not Evaluated]	[Not Applicable]	Thyroid Papillary Carcinoma - Follicular (>= 99% follicular patterned)	[Not Applicable]	No	[Not Available]	[Not Available]	[Not Available]	[Not Available]	C73	mar-40	C73.9	YES	[Not Available]	CT with contrast	YES	[Not Available]	[Not Available]	[Not Available]	1.4	2.3	2.0	[Not Available]	[Not Available]	[Not Available]	[Not Applicable]	MX	NX
294	TCGA-EM-A3AJ	39	[Not Applicable]	D8D54C81-7EF5-4B0F-B35B-28FBF8C5198E	[Not Available]	[Not Applicable]	[Not Applicable]	[Not Applicable]	[Not Applicable]	2012-04-23	-14399	[Not Applicable]	0	397	[Not Applicable]	[Not Available]	[Not Applicable]	None	[Not Available]	MALE	NO	[Not Evaluated]|[Not Evaluated]|[Not Evaluated]	[Not Applicable]	Thyroid Papillary Carcinoma - Follicular (>= 99% follicular patterned)	[Not Applicable]	No	[Not Available]	[Not Available]	[Not Available]	[Not Available]	C73	mar-40	C73.9	YES	24	[Not Available]	NO	[Not Available]	[Not Available]	[Not Available]	2.8	4.1	4.0	[Not Available]	4	[Not Available]	[Not Applicable]	MX	N1a
295	TCGA-EM-A3AK	62	[Not Applicable]	47BDE6DD-FA41-4D1B-8B20-2A5A5CDB2769	[Not Available]	[Not Applicable]	[Not Applicable]	[Not Applicable]	[Not Applicable]	2012-04-23	-22911	[Not Applicable]	0	282	[Not Applicable]	[Not Available]	[Not Applicable]	None	[Not Available]	FEMALE	NO	[Not Evaluated]|[Not Evaluated]|[Not Evaluated]	[Not Applicable]	Thyroid Papillary Carcinoma - Classical/usual	[Not Applicable]	No	[Not Available]	[Not Available]	[Not Available]	[Not Available]	C73	mar-60	C73.9	YES	2	Ultrasound	YES	[Not Available]	[Not Available]	[Not Available]	1.4	2.0	1.8	[Not Available]	0	[Not Available]	[Not Applicable]	MX	N0
296	TCGA-EM-A3AL	45	[Not Applicable]	0C50A2C2-1D4C-45CA-9127-F96D4DB18DAF	[Not Available]	[Not Applicable]	[Not Applicable]	[Not Applicable]	[Not Applicable]	2012-04-23	-16438	[Not Applicable]	0	203	[Not Applicable]	[Not Available]	[Not Applicable]	None	[Not Available]	FEMALE	NO	[Not Evaluated]|[Not Evaluated]|[Not Evaluated]	[Not Applicable]	Thyroid Papillary Carcinoma - Follicular (>= 99% follicular patterned)	[Not Applicable]	No	[Not Available]	[Not Available]	[Not Available]	[Not Available]	C73	mar-40	C73.9	YES	14	CT with contrast	YES	[Not Available]	[Not Available]	[Not Available]	1.5	1.9	1.6	[Not Available]	0	[Not Available]	[Not Applicable]	MX	N0
297	TCGA-EM-A3AN	36	[Not Applicable]	6491D025-C061-4180-BFD4-D7C6E6E55F66	[Not Available]	[Not Applicable]	[Not Applicable]	[Not Applicable]	[Not Applicable]	2012-04-23	-13188	[Not Applicable]	0	341	[Not Applicable]	[Not Available]	[Not Applicable]	None	[Not Available]	FEMALE	NO	[Not Evaluated]|[Not Evaluated]|[Not Evaluated]	[Not Applicable]	Thyroid Papillary Carcinoma - Classical/usual	[Not Applicable]	No	[Not Available]	[Not Available]	[Not Available]	[Not Available]	C73	mar-40	C73.9	YES	80	CT with contrast	YES	[Not Available]	[Not Available]	[Not Available]	1.0	1.2	1.0	[Not Available]	27	[Not Available]	[Not Applicable]	MX	N1b
298	TCGA-EM-A3AO	61	[Not Applicable]	19378727-E0A6-4898-B2D0-F12241616870	[Not Available]	[Not Applicable]	[Not Applicable]	[Not Applicable]	[Not Applicable]	2012-04-23	-22346	[Not Applicable]	0	336	[Not Applicable]	[Not Available]	[Not Applicable]	None	[Not Available]	MALE	NO	[Not Evaluated]|[Not Evaluated]|[Not Evaluated]	[Not Applicable]	Thyroid Papillary Carcinoma - Classical/usual	[Not Applicable]	No	[Not Available]	[Not Available]	[Not Available]	[Not Available]	C73	mar-60	C73.9	YES	26	CT with contrast	YES	[Not Available]	[Not Available]	[Not Available]	1.8	3.0	2.3	[Not Available]	10	[Not Available]	[Not Applicable]	MX	N1b
299	TCGA-EM-A3AP	31	[Not Applicable]	105210CC-6FE3-4615-A582-475553E14272	[Not Available]	[Not Applicable]	[Not Applicable]	[Not Applicable]	[Not Applicable]	2012-04-23	-11592	[Not Applicable]	0	161	[Not Applicable]	[Not Available]	[Not Applicable]	None	[Not Available]	FEMALE	NO	[Not Evaluated]|[Not Evaluated]|[Not Evaluated]	[Not Applicable]	Thyroid Papillary Carcinoma - Follicular (>= 99% follicular patterned)	[Not Applicable]	No	[Not Available]	[Not Available]	[Not Available]	[Not Available]	C73	mar-40	C73.9	YES	[Not Available]	Ultrasound	YES	[Not Available]	[Not Available]	[Not Available]	2.1	3.6	3.2	[Not Available]	[Not Available]	[Not Available]	[Not Applicable]	MX	NX
300	TCGA-EM-A3AQ	85	[Not Applicable]	E8F56D0F-EEE4-4DEF-A43A-DEC91F4382A1	[Not Available]	[Not Applicable]	[Not Applicable]	[Not Applicable]	[Not Applicable]	2012-04-23	-31197	[Not Applicable]	0	262	[Not Applicable]	[Not Available]	[Not Applicable]	None	[Not Available]	FEMALE	NO	[Not Evaluated]|[Not Evaluated]|[Not Evaluated]	[Not Applicable]	Thyroid Papillary Carcinoma - Classical/usual	[Not Applicable]	No	[Not Available]	[Not Available]	[Not Available]	[Not Available]	C73	mar-60	C73.9	YES	3	Ultrasound	YES	[Not Available]	[Not Available]	[Not Available]	0.9	1.3	1.0	[Not Available]	0	[Not Available]	[Not Applicable]	MX	N0
301	TCGA-EM-A3AR	41	[Not Applicable]	707312FE-1D92-413E-A891-1EA3F496C343	[Not Available]	[Not Applicable]	[Not Applicable]	[Not Applicable]	[Not Applicable]	2012-04-23	-15313	[Not Applicable]	0	207	[Not Applicable]	[Not Available]	[Not Applicable]	None	[Not Available]	MALE	NO	[Not Evaluated]|[Not Evaluated]|[Not Evaluated]	[Not Applicable]	Thyroid Papillary Carcinoma - Classical/usual	[Not Applicable]	No	[Not Available]	[Not Available]	[Not Available]	[Not Available]	C73	mar-60	C73.9	YES	1	Ultrasound	YES	[Not Available]	[Not Available]	[Not Available]	0.7	1.2	1.1	[Not Available]	1	[Not Available]	[Not Applicable]	MX	N1a
302	TCGA-EM-A3FJ	24	[Not Applicable]	C9C00E4F-4092-400E-AEBB-3D9961BE0F0E	[Not Available]	[Not Applicable]	[Not Applicable]	[Not Applicable]	[Not Applicable]	2012-05-18	-9042	[Not Applicable]	0	506	[Not Applicable]	[Not Available]	[Not Applicable]	None	[Not Available]	FEMALE	NO	[Not Evaluated]|[Not Evaluated]|[Not Evaluated]	[Not Applicable]	Thyroid Papillary Carcinoma - Classical/usual	[Not Applicable]	No	[Not Available]	[Not Available]	[Not Available]	[Not Available]	C73	mar-60	C73.9	YES	33	CT with contrast	YES	[Not Available]	[Not Available]	[Not Available]	0.6	1.0	0.8	[Not Available]	12	[Not Available]	[Not Applicable]	MX	N1b
303	TCGA-EM-A3FK	30	[Not Applicable]	0F9B78C8-EE9D-4E60-939C-BDBE040C212D	[Not Available]	[Not Applicable]	[Not Applicable]	[Not Applicable]	[Not Applicable]	2012-05-18	-10992	[Not Applicable]	0	512	[Not Applicable]	[Not Available]	[Not Applicable]	None	[Not Available]	FEMALE	NO	[Not Evaluated]|[Not Evaluated]|[Not Evaluated]	[Not Applicable]	Thyroid Papillary Carcinoma - Classical/usual	[Not Applicable]	No	[Not Available]	[Not Available]	[Not Available]	[Not Available]	C73	mar-60	C73.9	YES	25	CT with contrast	YES	[Not Available]	[Not Available]	[Not Available]	[Not Available]	1.2	[Not Available]	[Not Available]	17	[Not Available]	[Not Applicable]	MX	N1b
304	TCGA-EM-A3FL	63	[Not Applicable]	CFDD2155-57A9-499C-92E1-FB82B577B050	[Not Available]	[Not Applicable]	[Not Applicable]	[Not Applicable]	[Not Applicable]	2012-05-18	-23183	[Not Applicable]	0	349	[Not Applicable]	[Not Available]	[Not Applicable]	None	[Not Available]	FEMALE	NO	[Not Evaluated]|[Not Evaluated]|[Not Evaluated]	[Not Applicable]	Thyroid Papillary Carcinoma - Follicular (>= 99% follicular patterned)	[Not Applicable]	No	[Not Available]	[Not Available]	[Not Available]	[Not Available]	C73	mar-40	C73.9	YES	0	CT with contrast	YES	[Not Available]	[Not Available]	[Not Available]	[Not Available]	1.5	[Not Available]	[Not Available]	0	[Not Available]	[Not Applicable]	MX	NX
305	TCGA-EM-A3FM	57	[Not Applicable]	90473122-7221-491D-8FC2-0C72421D7861	[Not Available]	[Not Applicable]	[Not Applicable]	[Not Applicable]	[Not Applicable]	2012-05-18	-20937	[Not Applicable]	0	279	[Not Applicable]	[Not Available]	[Not Applicable]	None	[Not Available]	MALE	NO	[Not Evaluated]|[Not Evaluated]|[Not Evaluated]	[Not Applicable]	Thyroid Papillary Carcinoma - Classical/usual	[Not Applicable]	No	[Not Available]	[Not Available]	[Not Available]	[Not Available]	C73	mar-60	C73.9	YES	53	CT with contrast	YES	[Not Available]	[Not Available]	[Not Available]	0.9	2.2	2.0	[Not Available]	17	[Not Available]	[Not Applicable]	MX	N1b
306	TCGA-EM-A3FN	42	[Not Applicable]	59CD0969-A798-4D19-95ED-A311F39D2F38	[Not Available]	[Not Applicable]	[Not Applicable]	[Not Applicable]	[Not Applicable]	2012-05-18	-15655	[Not Applicable]	0	367	[Not Applicable]	[Not Available]	[Not Applicable]	None	[Not Available]	FEMALE	NO	[Not Evaluated]|[Not Evaluated]|[Not Evaluated]	[Not Applicable]	Thyroid Papillary Carcinoma - Follicular (>= 99% follicular patterned)	[Not Applicable]	No	[Not Available]	[Not Available]	[Not Available]	[Not Available]	C73	mar-40	C73.9	YES	2	Ultrasound	YES	[Not Available]	[Not Available]	[Not Available]	2.0	4.2	3.1	[Not Available]	0	[Not Available]	[Not Applicable]	MX	N0
307	TCGA-EM-A3FO	40	[Not Applicable]	B2E6933F-50E1-48E3-AE1F-173E1BC889FF	[Not Available]	[Not Applicable]	[Not Applicable]	[Not Applicable]	[Not Applicable]	2012-05-18	-14864	[Not Applicable]	0	238	[Not Applicable]	[Not Available]	[Not Applicable]	None	[Not Available]	MALE	NO	[Not Evaluated]|[Not Evaluated]|[Not Evaluated]	[Not Applicable]	Thyroid Papillary Carcinoma - Classical/usual	[Not Applicable]	No	[Not Available]	[Not Available]	[Not Available]	[Not Available]	C73	mar-60	C73.9	YES	3	CT with contrast	YES	[Not Available]	[Not Available]	[Not Available]	3.3	4.4	4.1	[Not Available]	0	[Not Available]	[Not Applicable]	MX	N0
308	TCGA-EM-A3FP	71	[Not Applicable]	C2291B36-7B7F-4C07-A164-6600D9E7929F	[Not Available]	[Not Applicable]	[Not Applicable]	[Not Applicable]	[Not Applicable]	2010-05-18	-26157	[Not Applicable]	0	234	[Not Applicable]	[Not Available]	[Not Applicable]	None	[Not Available]	FEMALE	NO	[Not Evaluated]|[Not Evaluated]|[Not Evaluated]	[Not Applicable]	Thyroid Papillary Carcinoma - Follicular (>= 99% follicular patterned)	[Not Applicable]	No	[Not Available]	[Not Available]	[Not Available]	[Not Available]	C73	mar-40	C73.9	YES	3	Ultrasound|MRI with contrast	YES	[Not Available]	[Not Available]	[Not Available]	1.6	2.2	1.7	[Not Available]	0	[Not Available]	[Not Applicable]	MX	N0
309	TCGA-EM-A3FQ	19	[Not Applicable]	FEF9C64F-5959-4DA0-AAA2-66B56FC7B4C3	[Not Available]	[Not Applicable]	[Not Applicable]	[Not Applicable]	[Not Applicable]	2012-05-18	-7175	[Not Applicable]	0	150	[Not Applicable]	[Not Available]	[Not Applicable]	None	[Not Available]	FEMALE	NO	[Not Evaluated]|[Not Evaluated]|[Not Evaluated]	[Not Applicable]	Other specify	cribriform morular	No	[Not Available]	[Not Available]	[Not Available]	[Not Available]	C73	mar-60	C73.9	YES	66	CT with contrast	YES	[Not Available]	[Not Available]	[Not Available]	[Not Available]	4.8	[Not Available]	[Not Available]	41	[Not Available]	[Not Applicable]	MX	N1b
310	TCGA-EM-A3FR	55	[Not Applicable]	2B84CFBC-7CF6-4CB1-A1E3-BA85DAFB89F4	[Not Available]	[Not Applicable]	[Not Applicable]	[Not Applicable]	[Not Applicable]	2012-05-18	-20348	[Not Applicable]	0	219	[Not Applicable]	[Not Available]	[Not Applicable]	None	[Not Available]	FEMALE	NO	[Not Evaluated]|[Not Evaluated]|[Not Evaluated]	[Not Applicable]	Thyroid Papillary Carcinoma - Classical/usual	[Not Applicable]	No	[Not Available]	[Not Available]	[Not Available]	[Not Available]	C73	mar-60	C73.9	YES	7	Ultrasound	YES	[Not Available]	[Not Available]	[Not Available]	1.9	3.0	2.0	[Not Available]	2	[Not Available]	[Not Applicable]	MX	N1a
311	TCGA-EM-A3O3	83	[Not Applicable]	2A398AF1-AEA5-4AAE-AB00-A2DC152F965A	[Not Available]	[Not Applicable]	[Not Applicable]	[Not Applicable]	[Not Applicable]	2012-07-04	-30499	[Not Applicable]	0	224	[Not Applicable]	[Unknown]	[Not Applicable]	None	[Not Available]	FEMALE	NO	[Not Evaluated]|[Not Evaluated]|[Not Evaluated]	[Not Applicable]	Thyroid Papillary Carcinoma - Classical/usual	[Not Applicable]	No	[Not Available]|[Not Available]	[Not Available]|[Not Available]	[Not Available]|[Not Available]	[Not Available]|[Not Available]	C73	mar-60	C73.9	YES	16	CT with contrast	YES	[Not Available]	[Not Available]	[Not Available]	1.4	3.1	2.7	NO	3	[Not Available]	[Not Applicable]	MX	N1a
312	TCGA-EM-A3O6	54	[Not Applicable]	398D5C2E-F877-4BBF-A10C-486B8523C9CE	[Not Available]	[Not Applicable]	[Not Applicable]	[Not Applicable]	[Not Applicable]	2012-07-04	-19975	[Not Applicable]	0	143	[Not Applicable]	[Unknown]	[Not Applicable]	None	[Not Available]	FEMALE	NO	[Not Evaluated]|[Not Evaluated]|[Not Evaluated]	[Not Applicable]	Thyroid Papillary Carcinoma - Follicular (>= 99% follicular patterned)	[Not Applicable]	No	[Not Available]|[Not Available]	[Not Available]|[Not Available]	[Not Available]|[Not Available]	[Unknown]|[Not Available]	C73	mar-40	C73.9	YES	[Not Available]	Ultrasound	YES	[Not Available]	[Not Available]	[Not Available]	1.2	4.0	2.4	NO	[Not Available]	[Not Available]	[Not Applicable]	MX	NX
313	TCGA-EM-A3O7	46	[Not Applicable]	3A211D5A-085F-4902-86B6-50E4EB36B897	[Not Available]	[Not Applicable]	[Not Applicable]	[Not Applicable]	[Not Applicable]	2012-07-04	-16842	[Not Applicable]	0	223	[Not Applicable]	[Unknown]	[Not Applicable]	None	[Not Available]	FEMALE	NO	[Not Evaluated]|[Not Evaluated]|[Not Evaluated]	[Not Applicable]	Thyroid Papillary Carcinoma - Classical/usual	[Not Applicable]	No	[Not Available]|[Not Available]	[Not Available]|[Not Available]	[Not Available]|[Not Available]	[Unknown]|[Not Available]	C73	mar-60	C73.9	YES	0	CT with contrast	YES	[Not Available]	[Not Available]	[Not Available]	3.4	5	4.7	NO	0	[Not Available]	[Not Applicable]	MX	NX
314	TCGA-EM-A3O8	33	[Not Applicable]	97B5017C-2066-4472-AB3F-31CFE64A6762	[Not Available]	[Not Applicable]	[Not Applicable]	[Not Applicable]	[Not Applicable]	2012-07-04	-12405	[Not Applicable]	0	15	[Not Applicable]	[Unknown]	[Not Applicable]	None	[Not Available]	FEMALE	NO	[Not Evaluated]|[Not Evaluated]|[Not Evaluated]	[Not Applicable]	Thyroid Papillary Carcinoma - Follicular (>= 99% follicular patterned)	[Not Applicable]	No	[Not Available]|[Not Available]	[Not Available]|[Not Available]	[Not Available]|[Not Available]	[Not Available]|[Not Available]	C73	mar-40	C73.9	YES	3	Ultrasound	YES	[Not Available]	[Not Available]	[Not Available]	1.1	1.3	1.1	NO	0	[Not Available]	[Not Applicable]	MX	N0
315	TCGA-EM-A3O9	40	[Not Applicable]	34B8D361-9C95-4F28-8E45-669DEFC5C3A7	[Not Available]	[Not Applicable]	[Not Applicable]	[Not Applicable]	[Not Applicable]	2012-07-04	-14782	[Not Applicable]	0	146	[Not Applicable]	[Unknown]	[Not Applicable]	None	[Not Available]	MALE	NO	[Not Evaluated]|[Not Evaluated]|[Not Evaluated]	[Not Applicable]	Thyroid Papillary Carcinoma - Follicular (>= 99% follicular patterned)	[Not Applicable]	No	[Not Available]|[Not Available]	[Not Available]|[Not Available]	[Not Available]|[Not Available]	[Unknown]|[Not Available]	C73	mar-42	C73.9	YES	2	Ultrasound	YES	[Not Available]	[Not Available]	[Not Available]	2.5	4.5	3.2	NO	0	[Not Available]	[Not Applicable]	MX	N0
316	TCGA-EM-A3OA	55	[Not Applicable]	24CF6397-60EF-4635-81F0-78A67157AAC0	[Not Available]	[Not Applicable]	[Not Applicable]	[Not Applicable]	[Not Applicable]	2012-07-04	-20283	[Not Applicable]	0	164	[Not Applicable]	[Unknown]	[Not Applicable]	None	[Not Available]	FEMALE	NO	[Not Evaluated]|[Not Evaluated]|[Not Evaluated]	[Not Applicable]	Thyroid Papillary Carcinoma - Follicular (>= 99% follicular patterned)	[Not Applicable]	No	[Not Available]|[Not Available]	[Not Available]|[Not Available]	[Not Available]|[Not Available]	[Not Available]|[Not Available]	C73	mar-40	C73.9	YES	1	[Not Available]	NO	[Not Available]	[Not Available]	[Not Available]	1.2	2.2	1.7	NO	0	[Not Available]	[Not Applicable]	MX	N0
317	TCGA-EM-A3OB	33	[Not Applicable]	8CFC2589-B0AD-4FE6-8420-8F6FE0178BCC	[Not Available]	[Not Applicable]	[Not Applicable]	[Not Applicable]	[Not Applicable]	2012-07-04	-12281	[Not Applicable]	0	71	[Not Applicable]	[Unknown]	[Not Applicable]	None	[Not Available]	FEMALE	NO	[Not Evaluated]|[Not Evaluated]|[Not Evaluated]	[Not Applicable]	Thyroid Papillary Carcinoma - Follicular (>= 99% follicular patterned)	[Not Applicable]	No	[Not Available]|[Not Available]	[Not Available]|[Not Available]	[Not Available]|[Not Available]	[Not Available]|[Not Available]	C73	mar-40	C73.9	YES	3	Ultrasound	YES	[Not Available]	[Not Available]	[Not Available]	1.2	2.2	1.6	NO	0	[Not Available]	[Not Applicable]	MX	N0
318	TCGA-EM-A3ST	62	[Not Applicable]	D5932DD7-B777-427F-8B55-3EC369FD76A3	[Not Available]	[Not Applicable]	[Not Applicable]	[Not Applicable]	[Not Applicable]	2012-11-23	-22990	[Not Applicable]	0	211	[Not Applicable]	[Unknown]	[Not Applicable]	None	[Not Available]	FEMALE	NO	[Not Evaluated]|[Not Evaluated]|[Not Evaluated]	[Not Applicable]	Thyroid Papillary Carcinoma - Follicular (>= 99% follicular patterned)	[Not Applicable]	No	[Not Available]|[Not Available]	[Not Available]|[Not Available]	[Not Available]|[Not Available]	[Unknown]|[Not Available]	C73	mar-40	C73.9	YES	1	CT with contrast	YES	[Not Available]	[Not Available]	[Not Available]	3.0	5.4	3.7	NO	0	[Not Available]	[Not Applicable]	MX	N0
319	TCGA-EM-A3SU	43	[Not Applicable]	FE28F76E-7EAD-4D29-8C53-A576AE6021F7	[Not Available]	[Not Applicable]	[Not Applicable]	[Not Applicable]	[Not Applicable]	2012-11-23	-15768	[Not Applicable]	0	267	[Not Applicable]	[Unknown]	[Not Applicable]	None	Parent	FEMALE	NO	[Not Evaluated]|[Not Evaluated]|[Not Evaluated]	[Not Applicable]	Thyroid Papillary Carcinoma - Classical/usual	[Not Applicable]	No	[Not Available]|[Not Available]	[Not Available]|[Not Available]	[Not Available]|[Not Available]	[Unknown]|[Not Available]	C73	mar-60	C73.9	YES	33	CT with contrast	YES	[Not Available]	[Not Available]	[Not Available]	1.5	2.1	2.0	NO	3	[Not Available]	[Not Applicable]	MX	N1b
320	TCGA-EM-A3SX	28	[Not Applicable]	14591CE2-ED02-440D-8004-7CA0AD94D0A7	[Not Available]	[Not Applicable]	[Not Applicable]	[Not Applicable]	[Not Applicable]	2012-11-23	-10446	[Not Applicable]	0	231	[Not Applicable]	[Unknown]	[Not Applicable]	None	[Not Available]	FEMALE	NO	[Not Evaluated]|[Not Evaluated]|[Not Evaluated]	[Not Applicable]	Thyroid Papillary Carcinoma - Classical/usual	[Not Applicable]	No	[Not Available]|[Not Available]	[Not Available]|[Not Available]	[Not Available]|[Not Available]	Patient did not receive I-131 treatment|[Not Available]	C73	mar-60	C73.9	YES	4	Ultrasound	YES	[Not Available]	[Not Available]	[Not Available]	1.8	4.4	2.7	NO	3	[Not Available]	[Not Applicable]	MX	N1a
321	TCGA-EM-A3SY	36	[Not Applicable]	95DCD0A2-2FCD-4952-9022-D8143BA61FAC	[Not Available]	[Not Applicable]	[Not Applicable]	[Not Applicable]	[Not Applicable]	2012-11-23	-13460	[Not Applicable]	0	176	[Not Applicable]	[Unknown]	[Not Applicable]	None	[Not Available]	MALE	NO	[Not Evaluated]|[Not Evaluated]|[Not Evaluated]	[Not Applicable]	Thyroid Papillary Carcinoma - Follicular (>= 99% follicular patterned)	[Not Applicable]	No	[Not Available]|[Not Available]	[Not Available]|[Not Available]	[Not Available]|[Not Available]	Patient did not receive I-131 treatment|[Not Available]	C73	mar-42	C73.9	YES	0	[Not Available]	NO	[Not Available]	[Not Available]	[Not Available]	1.2	1.4	1.3	NO	0	[Not Available]	[Not Applicable]	MX	NX
322	TCGA-EM-A3SZ	42	[Not Applicable]	104B6629-AFF4-411B-9704-547C47ADA5A1	[Not Available]	[Not Applicable]	[Not Applicable]	[Not Applicable]	[Not Applicable]	2012-11-23	-15659	[Not Applicable]	0	199	[Not Applicable]	[Unknown]	[Not Applicable]	None	[Not Available]	FEMALE	NO	[Not Evaluated]|[Not Evaluated]|[Not Evaluated]	[Not Applicable]	Thyroid Papillary Carcinoma - Classical/usual	[Not Applicable]	No	[Not Available]|[Not Available]	[Not Available]|[Not Available]	[Not Available]|[Not Available]	Patient did not receive I-131 treatment|[Not Available]	C73	mar-60	C73.9	YES	4	CT with contrast	YES	[Not Available]	[Not Available]	[Not Available]	1.6	2.6	1.6	NO	0	[Not Available]	[Not Applicable]	MX	N0
323	TCGA-EM-A4FF	40	[Not Applicable]	B7BAFE7F-295C-4598-9CC8-49D785BD2218	[Not Available]	[Not Applicable]	[Not Applicable]	[Not Applicable]	[Not Applicable]	2013-03-14	-14796	[Not Applicable]	0	2148	[Not Applicable]	[Unknown]	[Not Applicable]	None	[Not Available]	FEMALE	NO	[Not Evaluated]|[Not Evaluated]|[Not Evaluated]	[Not Applicable]	Thyroid Papillary Carcinoma - Classical/usual	[Not Applicable]	No	104 MCI|125	[Not Available]|[Not Available]	[Not Available]|229	Thyroxine withdrawal|Thyroxine withdrawal	C73	mar-60	C73.9	YES	4	Ultrasound	YES	[Not Available]	[Not Available]	[Not Available]	0.9	1.5	1.1	YES	1	[Not Available]	[Not Applicable]	MX	N1
324	TCGA-EM-A4FH	69	[Not Applicable]	4729410A-7240-4ED0-B478-78CC6C7A4810	[Not Available]	[Not Applicable]	[Not Applicable]	[Not Applicable]	[Not Applicable]	2013-03-14	-25499	[Not Applicable]	0	514	[Not Applicable]	[Unknown]	[Not Applicable]	None	[Unknown]	MALE	[Not Available]	[Not Evaluated]|[Not Evaluated]|[Not Evaluated]	[Not Applicable]	Thyroid Papillary Carcinoma - Follicular (>= 99% follicular patterned)	[Not Applicable]	No	3850 MBq|[Not Available]	[Not Available]|[Not Available]	[Not Available]|[Not Available]	Thyroxine withdrawal|[Not Available]	C73	mar-40	C73.9	YES	0	CT with contrast	YES	[Not Available]	[Not Available]	[Not Available]	1.7	4.7	3.5	NO	0	[Not Available]	[Not Applicable]	MX	NX
325	TCGA-EM-A4FK	33	[Not Applicable]	0DC361B5-E755-4131-8766-D2C1375336D8	[Not Available]	[Not Applicable]	[Not Applicable]	[Not Applicable]	[Not Applicable]	2013-03-18	-12383	[Not Applicable]	0	273	[Not Applicable]	[Unknown]	[Not Applicable]	None	[Not Available]	FEMALE	NO	[Not Evaluated]|[Not Evaluated]|[Not Evaluated]	[Not Applicable]	Thyroid Papillary Carcinoma - Follicular (>= 99% follicular patterned)	[Not Applicable]	No	[Not Available]|[Not Available]	[Not Available]|[Not Available]	[Not Available]|[Not Available]	Patient did not receive I-131 treatment|[Not Available]	C73	mar-42	C73.9	YES	0	Ultrasound	YES	[Not Available]	[Not Available]	[Not Available]	1.9	2.6	2.2	NO	0	[Not Available]	[Not Applicable]	MX	NX
326	TCGA-EM-A4FM	59	[Not Applicable]	12F90EFB-C45B-4372-8197-2DFD9CA247EA	[Not Available]	[Not Applicable]	[Not Applicable]	[Not Applicable]	[Not Applicable]	2013-03-19	-21595	[Not Applicable]	0	146	[Not Applicable]	[Unknown]	[Not Applicable]	Minimal (T3)	[Unknown]	FEMALE	NO	[Not Evaluated]|[Not Evaluated]|[Not Evaluated]	[Not Applicable]	Thyroid Papillary Carcinoma - Classical/usual	[Not Applicable]	No	150 MCI|[Not Available]	[Not Available]|[Not Available]	[Not Available]|[Not Available]	Thyroxine withdrawal|[Not Available]	C73	mar-60	C73.9	YES	40	Ultrasound|CT with contrast	YES	[Not Available]	[Not Available]	[Not Available]	2.1	3.0	2.5	NO	12	[Not Available]	[Not Applicable]	MX	N1b
327	TCGA-EM-A4FN	49	[Not Applicable]	F854CE67-C586-4424-A674-2DD67AD0ED7F	[Not Available]	[Not Applicable]	[Not Applicable]	[Not Applicable]	[Not Applicable]	2013-03-19	-18185	[Not Applicable]	0	261	[Not Applicable]	[Unknown]	[Not Applicable]	None	[Not Available]	FEMALE	NO	[Not Evaluated]|[Not Evaluated]|[Not Evaluated]	[Not Applicable]	Thyroid Papillary Carcinoma - Classical/usual	[Not Applicable]	No	3848 MBq|[Not Available]	[Not Available]|[Not Available]	[Not Available]|[Not Available]	Thyroxine withdrawal|[Not Available]	C73	mar-60	C73.9	YES	32	Ultrasound	YES	[Not Available]	[Not Available]	[Not Available]	1.6	1.9	1.7	NO	8	[Not Available]	[Not Applicable]	MX	N1b
328	TCGA-EM-A4FO	72	[Not Applicable]	E0AB95EF-5C96-4D00-8950-04E26E3B4672	[Not Available]	[Not Applicable]	[Not Applicable]	[Not Applicable]	[Not Applicable]	2013-03-18	-26589	[Not Applicable]	0	254	[Not Applicable]	[Unknown]	[Not Applicable]	None	[Not Available]	MALE	NO	[Not Evaluated]|[Not Evaluated]|[Not Evaluated]	[Not Applicable]	Thyroid Papillary Carcinoma - Classical/usual	[Not Applicable]	No	103 MCI|[Not Available]	[Not Available]|[Not Available]	[Not Available]|[Not Available]	rhTSH|[Not Available]	C73	mar-60	C73.9	YES	6	CT with contrast	YES	[Not Available]	[Not Available]	[Not Available]	[Not Available]	1.1	0.9	NO	0	[Not Available]	[Not Applicable]	MX	N0
329	TCGA-EM-A4FQ	42	[Not Applicable]	511B5F28-709B-4E43-9EFD-B2F425BBA962	[Not Available]	[Not Applicable]	[Not Applicable]	[Not Applicable]	[Not Applicable]	2013-03-19	-15534	[Not Applicable]	0	298	[Not Applicable]	[Unknown]	[Not Applicable]	None	[Not Available]	FEMALE	NO	[Not Evaluated]|[Not Evaluated]|[Not Evaluated]	[Not Applicable]	Thyroid Papillary Carcinoma - Follicular (>= 99% follicular patterned)	[Not Applicable]	No	120 MCI|[Not Available]	[Not Available]|[Not Available]	[Not Available]|[Not Available]	rhTSH|[Not Available]	C73	mar-60	C73.9	YES	55	CT with contrast	YES	[Not Available]	[Not Available]	[Not Available]	3.0	3.5	3.0	NO	17	[Not Available]	[Not Applicable]	MX	N1
330	TCGA-EM-A4FR	28	[Not Applicable]	8DD09D74-0BE8-4C58-BF44-DE4A2466D044	[Not Available]	[Not Applicable]	[Not Applicable]	[Not Applicable]	[Not Applicable]	2013-03-14	-10316	[Not Applicable]	0	153	[Not Applicable]	[Unknown]	[Not Applicable]	None	[Not Available]	MALE	NO	[Not Evaluated]|[Not Evaluated]|[Not Evaluated]	[Not Applicable]	Other specify	cribiform morular	No	[Not Available]|[Not Available]	[Not Available]|[Not Available]	100 MCI (3730 MBQ)|[Not Available]	rhTSH|[Not Available]	C73	mar-60	C73.9	YES	3	CT with contrast	YES	[Not Available]	[Not Available]	[Not Available]	3.5	5.1	4.3	NO	3	[Not Available]	[Not Applicable]	MX	N1
331	TCGA-EM-A4FU	35	[Not Applicable]	50EC4170-29EA-4EE9-8CE7-67EC78D1DC76	[Not Available]	[Not Applicable]	[Not Applicable]	[Not Applicable]	[Not Applicable]	2013-03-21	-12912	[Not Applicable]	0	1152	[Not Applicable]	[Unknown]	[Not Applicable]	None	[Not Available]	MALE	NO	[Not Evaluated]|[Not Evaluated]|[Not Evaluated]	[Not Applicable]	Thyroid Papillary Carcinoma - Follicular (>= 99% follicular patterned)	[Not Applicable]	No	76 MCI|[Not Available]	[Not Available]|[Not Available]	[Not Available]|[Not Available]	rhTSH|[Not Available]	C73	mar-40	C73.9	YES	0	Ultrasound	YES	[Not Available]	[Not Available]	[Not Available]	3.0	4.2	3.3	NO	0	[Not Available]	[Not Applicable]	MX	NX
332	TCGA-EM-A4FV	64	[Not Applicable]	646D1585-2D12-483C-8425-77D5451B2869	[Not Available]	[Not Applicable]	[Not Applicable]	[Not Applicable]	[Not Applicable]	2013-03-21	-23626	[Not Applicable]	0	387	[Not Applicable]	[Unknown]	[Not Applicable]	None	[Not Available]	FEMALE	NO	[Not Evaluated]|[Not Evaluated]|[Not Evaluated]	[Not Applicable]	Thyroid Papillary Carcinoma - Classical/usual	[Not Applicable]	No	[Not Available]|[Not Available]	[Not Available]|[Not Available]	[Not Available]|[Not Available]	Patient did not receive I-131 treatment|[Not Available]	C73	mar-40	C73.9	YES	5	Ultrasound	YES	[Not Available]	[Not Available]	[Not Available]	1.1	1.3	1.2	NO	0	[Not Available]	[Not Applicable]	MX	N0
333	TCGA-EM-A4G1	26	[Not Applicable]	CA625067-1C6D-45C7-B752-AF40C8327EA5	[Not Available]	[Not Applicable]	[Not Applicable]	[Not Applicable]	[Not Applicable]	2013-03-21	-9844	[Not Applicable]	0	29	[Not Applicable]	[Unknown]	[Not Applicable]	None	[Not Available]	FEMALE	NO	[Not Evaluated]|[Not Evaluated]|[Not Evaluated]	[Not Applicable]	Thyroid Papillary Carcinoma - Classical/usual	[Not Applicable]	No	[Not Available]|[Not Available]	[Not Available]|[Not Available]	[Not Available]|[Not Available]	[Not Available]|[Not Available]	C73	mar-40	C73.9	YES	2	CT with contrast	YES	[Not Available]	[Not Available]	[Not Available]	1.4	1.7	1.6	NO	0	[Not Available]	[Not Applicable]	MX	N0
334	TCGA-ET-A25G	56	[Not Applicable]	e23cd75a-06ad-4da0-b19b-b812b0f6c1b9	[Not Available]	[Not Applicable]	[Not Applicable]	[Not Applicable]	[Not Applicable]	2011-08-18	-20816	[Not Applicable]	0	1088	[Not Applicable]	NOT HISPANIC OR LATINO	[Not Applicable]	Minimal (T3)	[Not Available]	FEMALE	NO	[Not Evaluated]|[Not Evaluated]|[Not Evaluated]	[Not Applicable]	Thyroid Papillary Carcinoma - Tall Cell (>= 50% tall cell features)	[Not Applicable]	No	[Not Available]	[Not Available]	[Not Available]	[Not Available]	C73	mar-44	C73.9	YES	1	Ultrasound	YES	[Not Available]	[Not Available]	[Not Available]	2.7	4.0	3.0	[Not Available]	0	[Not Available]	[Not Applicable]	MX	N0
335	TCGA-ET-A25I	37	[Not Applicable]	1005ccb2-10ef-4e37-950e-ad72393db03c	[Not Available]	[Not Applicable]	[Not Applicable]	[Not Applicable]	[Not Applicable]	2011-08-18	-13786	[Not Applicable]	0	10	[Not Applicable]	NOT HISPANIC OR LATINO	[Not Applicable]	None	[Not Available]	FEMALE	NO	[Not Evaluated]|[Not Evaluated]|[Not Evaluated]	[Not Applicable]	Thyroid Papillary Carcinoma - Follicular (>= 99% follicular patterned)	[Not Applicable]	No	[Not Available]	[Not Available]	[Not Available]	[Not Available]	C73	mar-40	C73.9	YES	1	Ultrasound	YES	[Not Available]	[Not Available]	[Not Available]	1.5	2.4	1.8	[Not Available]	0	[Not Available]	[Not Applicable]	MX	N0
336	TCGA-ET-A25J	40	[Not Applicable]	618a1c29-5c26-46db-83d5-4799f9043cd3	[Not Available]	[Not Applicable]	[Not Applicable]	[Not Applicable]	[Not Applicable]	2011-08-19	-14842	[Not Applicable]	0	903	[Not Applicable]	NOT HISPANIC OR LATINO	[Not Applicable]	None	[Not Available]	FEMALE	NO	[Not Evaluated]|[Not Evaluated]|[Not Evaluated]	[Not Applicable]	Thyroid Papillary Carcinoma - Classical/usual	[Not Applicable]	No	[Not Available]	[Not Available]	[Not Available]	[Not Available]	C73	mar-60	C73.9	YES	18	Ultrasound	YES	[Not Available]	[Not Available]	[Not Available]	1.5	2.5	2.4	[Not Available]	2	[Not Available]	[Not Applicable]	MX	N1a
337	TCGA-ET-A25K	36	[Not Applicable]	2f9ed09d-2626-4c23-ba47-1850d36f812a	[Not Available]	[Not Applicable]	[Not Applicable]	[Not Applicable]	[Not Applicable]	2011-08-19	-13351	[Not Applicable]	0	589	[Not Applicable]	NOT HISPANIC OR LATINO	[Not Applicable]	None	[Not Available]	FEMALE	NO	[Not Evaluated]|[Not Evaluated]|[Not Evaluated]	[Not Applicable]	Thyroid Papillary Carcinoma - Classical/usual	[Not Applicable]	No	[Not Available]	[Not Available]	[Not Available]	[Not Available]	C73	mar-60	C73.9	YES	11	Ultrasound	YES	[Not Available]	[Not Available]	[Not Available]	1.8	2.5	2.5	[Not Available]	3	[Not Available]	[Not Applicable]	MX	N1a
338	TCGA-ET-A25L	52	[Not Applicable]	4481d84d-109e-44a0-bcb4-e6e61bdce796	[Not Available]	[Not Applicable]	[Not Applicable]	[Not Applicable]	[Not Applicable]	2011-08-19	-19159	[Not Applicable]	0	450	[Not Applicable]	NOT HISPANIC OR LATINO	[Not Applicable]	Minimal (T3)	[Not Available]	FEMALE	NO	[Not Evaluated]|[Not Evaluated]|[Not Evaluated]	[Not Applicable]	Thyroid Papillary Carcinoma - Tall Cell (>= 50% tall cell features)	[Not Applicable]	No	[Not Available]	[Not Available]	[Not Available]	[Not Available]	C73	mar-44	C73.9	YES	12	Ultrasound	YES	[Not Available]	[Not Available]	[Not Available]	2.0	3.0	2.0	[Not Available]	2	[Not Available]	[Not Applicable]	MX	N1b
339	TCGA-ET-A25M	33	[Not Applicable]	8023d4c9-b56d-417a-9a52-d45b59c756ed	[Not Available]	[Not Applicable]	[Not Applicable]	[Not Applicable]	[Not Applicable]	2011-08-19	-12085	[Not Applicable]	0	375	[Not Applicable]	NOT HISPANIC OR LATINO	[Not Applicable]	None	[Not Available]	MALE	NO	[Not Evaluated]|[Not Evaluated]|[Not Evaluated]	[Not Applicable]	Thyroid Papillary Carcinoma - Classical/usual	[Not Applicable]	No	[Not Available]	[Not Available]	[Not Available]	[Not Available]	C73	mar-60	C73.9	YES	2	Ultrasound	YES	[Not Available]	[Not Available]	[Not Available]	2.0	2.5	2.0	[Not Available]	1	[Not Available]	[Not Applicable]	MX	N1
340	TCGA-ET-A25N	28	[Not Applicable]	ebccfb5f-c0a8-4263-aaff-b5dd83585191	[Not Available]	[Not Applicable]	[Not Applicable]	[Not Applicable]	[Not Applicable]	2011-08-19	-10229	[Not Applicable]	0	75	[Not Applicable]	NOT HISPANIC OR LATINO	[Not Applicable]	None	[Not Available]	FEMALE	NO	[Not Evaluated]|[Not Evaluated]|[Not Evaluated]	[Not Applicable]	Thyroid Papillary Carcinoma - Classical/usual	[Not Applicable]	No	[Not Available]	[Not Available]	[Not Available]	[Not Available]	C73	mar-60	C73.9	YES	8	[Not Available]	NO	[Not Available]	[Not Available]	[Not Available]	2.0	2.3	1.5	[Not Available]	1	[Not Available]	[Not Applicable]	MX	N1a
341	TCGA-ET-A25O	35	[Not Applicable]	c30eb9bd-d705-4464-9014-e0aa7cda53c7	[Not Available]	[Not Applicable]	[Not Applicable]	[Not Applicable]	[Not Applicable]	2011-08-15	-12924	[Not Applicable]	0	135	[Not Applicable]	NOT HISPANIC OR LATINO	[Not Applicable]	None	[Not Available]	FEMALE	NO	[Not Evaluated]|[Not Evaluated]|[Not Evaluated]	[Not Applicable]	Thyroid Papillary Carcinoma - Classical/usual	[Not Applicable]	No	[Not Available]	[Not Available]	[Not Available]	[Not Available]	C73	mar-60	C73.9	YES	5	Ultrasound	YES	[Not Available]	[Not Available]	[Not Available]	2.0	2.3	2.0	[Not Available]	2	[Not Available]	[Not Applicable]	MX	N1a
342	TCGA-ET-A25P	24	[Not Applicable]	12ecc0e5-8cb8-406e-ac9f-4f8c22b64fc1	[Not Available]	[Not Applicable]	[Not Applicable]	[Not Applicable]	[Not Applicable]	2011-08-19	-8787	[Not Applicable]	0	15	[Not Applicable]	NOT HISPANIC OR LATINO	[Not Applicable]	None	[Not Available]	FEMALE	NO	[Not Evaluated]|[Not Evaluated]|[Not Evaluated]	[Not Applicable]	Thyroid Papillary Carcinoma - Classical/usual	[Not Applicable]	No	[Not Available]	[Not Available]	[Not Available]	[Not Available]	C73	mar-60	C73.9	YES	3	Ultrasound	YES	[Not Available]	[Not Available]	[Not Available]	0.4	0.6	0.5	[Not Available]	0	[Not Available]	[Not Applicable]	MX	N0
343	TCGA-ET-A25R	51	[Not Applicable]	097b9cf1-ec0c-487c-9ade-2bdab12eb4ca	[Not Available]	[Not Applicable]	[Not Applicable]	[Not Applicable]	[Not Applicable]	2011-08-18	-18863	[Not Applicable]	0	621	[Not Applicable]	NOT HISPANIC OR LATINO	[Not Applicable]	Minimal (T3)	[Not Available]	FEMALE	NO	[Not Evaluated]|[Not Evaluated]|[Not Evaluated]	[Not Applicable]	Thyroid Papillary Carcinoma - Tall Cell (>= 50% tall cell features)	[Not Applicable]	No	[Not Available]	[Not Available]	[Not Available]	[Not Available]	C73	mar-44	C73.9	YES	[Not Available]	Ultrasound	YES	[Not Available]	[Not Available]	[Not Available]	1.1	2.6	1.6	[Not Available]	[Not Available]	[Not Available]	[Not Applicable]	MX	NX
344	TCGA-ET-A2MX	27	[Not Applicable]	59681E8F-CF57-47B4-82E1-6BE8EAD9583E	[Not Available]	[Not Applicable]	[Not Applicable]	[Not Applicable]	[Not Applicable]	2012-09-30	-10044	[Not Applicable]	0	1643	[Not Applicable]	NOT HISPANIC OR LATINO	[Not Applicable]	None	[Not Available]	MALE	NO	[Not Evaluated]|[Not Evaluated]|[Not Evaluated]	[Not Applicable]	Thyroid Papillary Carcinoma - Classical/usual	[Not Applicable]	No	[Not Available]|[Not Available]	[Not Available]|[Not Available]	[Not Available]|[Not Available]	[Unknown]|[Not Available]	C73	mar-60	C73.9	YES	4	Ultrasound	YES	[Not Available]	[Not Available]	[Not Available]	[Not Available]	2.1	[Not Available]	NO	4	[Not Available]	[Not Applicable]	MX	N1a
345	TCGA-ET-A2MY	72	[Not Applicable]	EB15422B-CAFD-4AF2-973E-8C997A911170	[Not Available]	[Not Applicable]	[Not Applicable]	[Not Applicable]	[Not Applicable]	2011-12-09	-26405	[Not Applicable]	0	579	[Not Applicable]	NOT HISPANIC OR LATINO	[Not Applicable]	None	[Not Available]	FEMALE	NO	[Not Available]|[Not Available]|[Not Available]	[Not Applicable]	Thyroid Papillary Carcinoma - Classical/usual	[Not Applicable]	No	[Not Available]	[Not Available]	[Not Available]	[Not Available]	C73	mar-60	C73.9	YES	[Not Available]	[Not Available]	NO	[Not Available]	[Not Available]	[Not Available]	0.3	1.3	0.6	[Not Available]	[Not Available]	[Not Available]	[Not Applicable]	MX	NX
346	TCGA-ET-A2MZ	39	[Not Applicable]	4FA53EB7-1FDB-4FE5-B5AD-F3D8069B3EB8	[Not Available]	[Not Applicable]	[Not Applicable]	[Not Applicable]	[Not Applicable]	2011-12-09	-14408	[Not Applicable]	0	373	[Not Applicable]	NOT HISPANIC OR LATINO	[Not Applicable]	None	[Not Available]	MALE	NO	[Not Available]|[Not Available]|[Not Available]	[Not Applicable]	Thyroid Papillary Carcinoma - Classical/usual	[Not Applicable]	No	[Not Available]	[Not Available]	[Not Available]	[Not Available]	C73	mar-60	C73.9	YES	6	Ultrasound	YES	[Not Available]	[Not Available]	[Not Available]	1.0	1.2	1.2	[Not Available]	0	[Not Available]	[Not Applicable]	MX	N0
347	TCGA-ET-A2N0	51	[Not Applicable]	212AA9C4-610D-4286-9CA2-AE6C87B9BC0E	[Not Available]	[Not Applicable]	[Not Applicable]	[Not Applicable]	[Not Applicable]	2011-12-09	-18692	[Not Applicable]	0	133	[Not Applicable]	NOT HISPANIC OR LATINO	[Not Applicable]	None	[Not Available]	FEMALE	NO	[Not Available]|[Not Available]|[Not Available]	[Not Applicable]	Thyroid Papillary Carcinoma - Classical/usual	[Not Applicable]	No	[Not Available]	[Not Available]	[Not Available]	[Not Available]	C73	mar-60	C73.9	YES	27	Ultrasound	YES	[Not Available]	[Not Available]	[Not Available]	1.5	2.0	1.5	[Not Available]	20	[Not Available]	[Not Applicable]	MX	N1a
349	TCGA-ET-A2N3	34	[Not Applicable]	9DCAA676-10CA-48CB-B245-7CC4BD1FE9BB	[Not Available]	[Not Applicable]	[Not Applicable]	[Not Applicable]	[Not Applicable]	2012-09-30	-12603	[Not Applicable]	0	198	[Not Applicable]	NOT HISPANIC OR LATINO	[Not Applicable]	None	[Not Available]	FEMALE	NO	[Not Evaluated]|[Not Evaluated]|[Not Evaluated]	[Not Applicable]	Thyroid Papillary Carcinoma - Follicular (>= 99% follicular patterned)	[Not Applicable]	No	[Not Available]|[Not Available]	[Not Available]|[Not Available]	[Not Available]|[Not Available]	[Unknown]|[Not Available]	C73	mar-40	C73.9	YES	[Not Available]	Ultrasound	YES	[Not Available]	[Not Available]	[Not Available]	[Not Available]	4.0	[Not Available]	NO	[Not Available]	[Not Available]	[Not Applicable]	MX	NX
350	TCGA-ET-A2N4	53	[Not Applicable]	3DCEE02C-A3D2-4188-A072-4D36C8A7E8FD	[Not Available]	[Not Applicable]	[Not Applicable]	[Not Applicable]	[Not Applicable]	2011-12-09	-19671	[Not Applicable]	0	43	[Not Applicable]	NOT HISPANIC OR LATINO	[Not Applicable]	Minimal (T3)	[Not Available]	FEMALE	NO	[Not Available]|[Not Available]|[Not Available]	[Not Applicable]	Thyroid Papillary Carcinoma - Follicular (>= 99% follicular patterned)	[Not Applicable]	No	[Not Available]	[Not Available]	[Not Available]	[Not Available]	C73	mar-40	C73.9	YES	2	Ultrasound	YES	[Not Available]	[Not Available]	[Not Available]	[Not Available]	4.5	[Not Available]	[Not Available]	0	[Not Available]	[Not Applicable]	MX	N0
351	TCGA-ET-A2N5	46	[Not Applicable]	7D818F01-49A6-4BA8-9F1C-C77398ADBDD0	[Not Available]	[Not Applicable]	[Not Applicable]	[Not Applicable]	[Not Applicable]	2011-12-09	-17137	[Not Applicable]	0	1182	[Not Applicable]	NOT HISPANIC OR LATINO	[Not Applicable]	Minimal (T3)	Parent|Child	FEMALE	NO	[Not Available]|[Not Available]|[Not Available]	[Not Applicable]	Thyroid Papillary Carcinoma - Follicular (>= 99% follicular patterned)	[Not Applicable]	No	[Not Available]	[Not Available]	[Not Available]	[Not Available]	C73	mar-40	C73.9	YES	[Not Available]	Ultrasound	YES	[Not Available]	[Not Available]	[Not Available]	2.0	4.5	2.5	[Not Available]	[Not Available]	[Not Available]	[Not Applicable]	MX	NX
352	TCGA-ET-A39I	83	[Not Applicable]	369A07A5-F835-4886-A204-D5584C67F253	[Not Available]	[Not Applicable]	[Not Applicable]	[Not Applicable]	[Not Applicable]	2011-12-09	-30349	[Not Applicable]	0	9	[Not Applicable]	NOT HISPANIC OR LATINO	[Not Applicable]	None	[Not Available]	FEMALE	NO	[Not Available]|[Not Available]|[Not Available]	[Not Applicable]	Thyroid Papillary Carcinoma - Follicular (>= 99% follicular patterned)	[Not Applicable]	No	[Not Available]	[Not Available]	[Not Available]	[Not Available]	C73	mar-40	C73.9	YES	[Not Available]	Ultrasound	YES	[Not Available]	[Not Available]	[Not Available]	[Not Available]	1.9	[Not Available]	[Not Available]	[Not Available]	[Not Available]	[Not Applicable]	MX	NX
353	TCGA-ET-A39J	23	[Not Applicable]	1757C89F-8795-4C3B-BBAD-1E6F617F2472	[Not Available]	[Not Applicable]	[Not Applicable]	[Not Applicable]	[Not Applicable]	2011-12-09	-8490	[Not Applicable]	0	362	[Not Applicable]	NOT HISPANIC OR LATINO	[Not Applicable]	None	[Not Available]	FEMALE	NO	[Not Available]|[Not Available]|[Not Available]	[Not Applicable]	Thyroid Papillary Carcinoma - Classical/usual	[Not Applicable]	No	[Not Available]	[Not Available]	[Not Available]	[Not Available]	C73	mar-60	C73.9	YES	[Not Available]	[Not Available]	NO	[Not Available]	[Not Available]	[Not Available]	1.5	3.0	2.0	[Not Available]	[Not Available]	[Not Available]	[Not Applicable]	MX	NX
354	TCGA-ET-A39K	48	[Not Applicable]	6E1C9AC8-EEAD-4DB9-8F30-EF3591DAF78B	[Not Available]	[Not Applicable]	[Not Applicable]	[Not Applicable]	[Not Applicable]	2011-12-09	-17789	[Not Applicable]	0	2058	[Not Applicable]	NOT HISPANIC OR LATINO	[Not Applicable]	Minimal (T3)	[Not Available]	FEMALE	NO	[Not Available]|[Not Available]|[Not Available]	[Not Applicable]	Thyroid Papillary Carcinoma - Classical/usual	[Not Applicable]	No	[Not Available]	[Not Available]	[Not Available]	[Not Available]	C73	mar-60	C73.9	YES	14	[Not Available]	NO	[Not Available]	[Not Available]	[Not Available]	[Not Available]	4.0	[Not Available]	[Not Available]	11	[Not Available]	[Not Applicable]	MX	N1a
355	TCGA-ET-A39L	20	[Not Applicable]	CD73C807-A74E-46A8-9855-92DE33DA9B0D	[Not Available]	[Not Applicable]	[Not Applicable]	[Not Applicable]	[Not Applicable]	2011-12-09	-7636	[Not Applicable]	0	59	[Not Applicable]	NOT HISPANIC OR LATINO	[Not Applicable]	None	[Not Available]	FEMALE	NO	[Not Available]|[Not Available]|[Not Available]	[Not Applicable]	Thyroid Papillary Carcinoma - Classical/usual	[Not Applicable]	No	[Not Available]	[Not Available]	[Not Available]	[Not Available]	C73	mar-60	C73.9	YES	4	[Not Available]	NO	[Not Available]	[Not Available]	[Not Available]	[Not Available]	5.5	[Not Available]	[Not Available]	0	[Not Available]	[Not Applicable]	MX	N0
356	TCGA-ET-A39M	34	[Not Applicable]	E9949320-AD37-4542-98C1-B72DF60B1668	[Not Available]	[Not Applicable]	[Not Applicable]	[Not Applicable]	[Not Applicable]	2011-12-09	-12441	[Not Applicable]	0	2266	[Not Applicable]	NOT HISPANIC OR LATINO	[Not Applicable]	None	[Not Available]	MALE	NO	[Not Available]|[Not Available]|[Not Available]	[Not Applicable]	Thyroid Papillary Carcinoma - Classical/usual	[Not Applicable]	No	[Not Available]	[Not Available]	[Not Available]	[Not Available]	C73	mar-60	C73.9	YES	[Not Available]	Ultrasound	YES	[Not Available]	[Not Available]	[Not Available]	1.5	4.0	3.5	[Not Available]	[Not Available]	[Not Available]	[Not Applicable]	MX	NX
357	TCGA-ET-A39N	35	[Not Applicable]	87858089-1BAD-4E5D-80ED-04F846DA9CA4	[Not Available]	[Not Applicable]	[Not Applicable]	[Not Applicable]	[Not Applicable]	2011-12-09	-12904	[Not Applicable]	0	2535	[Not Applicable]	NOT HISPANIC OR LATINO	[Not Applicable]	None	Sibling	FEMALE	NO	[Not Available]|[Not Available]|[Not Available]	[Not Applicable]	Thyroid Papillary Carcinoma - Classical/usual	[Not Applicable]	No	[Not Available]	[Not Available]	[Not Available]	[Not Available]	C73	mar-60	C73.9	YES	[Not Available]	[Not Available]	NO	[Not Available]	[Not Available]	[Not Available]	3.0	5.0	3.0	[Not Available]	[Not Available]	[Not Available]	[Not Applicable]	MX	NX
358	TCGA-ET-A39O	39	[Not Applicable]	D2512FD6-9042-4A62-8B49-D483CB84B89D	[Not Available]	[Not Applicable]	[Not Applicable]	[Not Applicable]	[Not Applicable]	2011-12-09	-14295	[Not Applicable]	0	1309	[Not Applicable]	NOT HISPANIC OR LATINO	[Not Applicable]	None	[Not Available]	MALE	NO	[Not Available]|[Not Available]|[Not Available]	[Not Applicable]	Thyroid Papillary Carcinoma - Tall Cell (>= 50% tall cell features)	[Not Applicable]	No	[Not Available]	[Not Available]	[Not Available]	[Not Available]	C73	mar-44	C73.9	YES	4	Ultrasound	YES	[Not Available]	[Not Available]	[Not Available]	1.5	1.6	1.5	[Not Available]	0	[Not Available]	[Not Applicable]	MX	N0
359	TCGA-ET-A39P	73	[Not Applicable]	44465A32-8EE9-4575-94B8-0200BA7C5BD4	[Not Available]	[Not Applicable]	[Not Applicable]	[Not Applicable]	[Not Applicable]	2011-12-09	-26816	[Not Applicable]	0	406	[Not Applicable]	NOT HISPANIC OR LATINO	[Not Applicable]	Minimal (T3)	[Not Available]	FEMALE	NO	[Not Available]|[Not Available]|[Not Available]	[Not Applicable]	Thyroid Papillary Carcinoma - Classical/usual	[Not Applicable]	No	[Not Available]	[Not Available]	[Not Available]	[Not Available]	C73	mar-60	C73.9	YES	2	[Not Available]	NO	[Not Available]	[Not Available]	[Not Available]	2.5	5.3	3.0	[Not Available]	0	[Not Available]	[Not Applicable]	MX	N0
360	TCGA-ET-A39R	24	[Not Applicable]	9A19F08B-386A-40B1-B694-78E8556A6CAA	[Not Available]	[Not Applicable]	[Not Applicable]	[Not Applicable]	[Not Applicable]	2011-12-09	-8827	[Not Applicable]	0	1413	[Not Applicable]	HISPANIC OR LATINO	[Not Applicable]	None	[Not Available]	FEMALE	NO	[Not Available]|[Not Available]|[Not Available]	[Not Applicable]	Thyroid Papillary Carcinoma - Classical/usual	[Not Applicable]	No	[Not Available]	[Not Available]	[Not Available]	[Not Available]	C73	mar-60	C73.9	YES	18	Ultrasound	YES	[Not Available]	[Not Available]	[Not Available]	[Not Available]	1.8	[Not Available]	[Not Available]	0	[Not Available]	[Not Applicable]	MX	N0
361	TCGA-ET-A39S	27	[Not Applicable]	DFE086E6-71A5-4131-9602-F20977BF7454	[Not Available]	[Not Applicable]	[Not Applicable]	[Not Applicable]	[Not Applicable]	2011-12-09	-9999	[Not Applicable]	0	20	[Not Applicable]	NOT HISPANIC OR LATINO	[Not Applicable]	None	[Not Available]	FEMALE	NO	[Not Available]|[Not Available]|[Not Available]	[Not Applicable]	Thyroid Papillary Carcinoma - Classical/usual	[Not Applicable]	No	[Not Available]	[Not Available]	[Not Available]	[Not Available]	C73	mar-60	C73.9	YES	2	[Not Available]	NO	[Not Available]	[Not Available]	[Not Available]	[Not Available]	1.0	[Not Available]	[Not Available]	0	[Not Available]	[Not Applicable]	MX	N0
362	TCGA-ET-A39T	55	[Not Applicable]	7A45CBC2-9FBE-49F9-9D70-F8DC82829769	[Not Available]	[Not Applicable]	[Not Applicable]	[Not Applicable]	[Not Applicable]	2011-12-09	-20164	[Not Applicable]	0	237	[Not Applicable]	NOT HISPANIC OR LATINO	[Not Applicable]	Minimal (T3)	[Not Available]	FEMALE	NO	[Not Available]|[Not Available]|[Not Available]	[Not Applicable]	Thyroid Papillary Carcinoma - Follicular (>= 99% follicular patterned)	[Not Applicable]	No	[Not Available]	[Not Available]	[Not Available]	[Not Available]	C73	mar-40	C73.9	YES	2	[Not Available]	NO	[Not Available]	[Not Available]	[Not Available]	3.0	6.0	3.3	[Not Available]	0	[Not Available]	[Not Applicable]	MX	N0
363	TCGA-ET-A3BN	33	[Not Applicable]	3B5582E4-58AF-4A01-B83D-6FE9704F2B43	[Not Available]	[Not Applicable]	[Not Applicable]	[Not Applicable]	[Not Applicable]	2012-01-06	-12121	[Not Applicable]	0	51	[Not Applicable]	NOT HISPANIC OR LATINO	[Not Applicable]	None	[Not Available]	FEMALE	NO	[Not Available]|[Not Available]|[Not Available]	[Not Applicable]	Thyroid Papillary Carcinoma - Classical/usual	[Not Applicable]	No	[Not Available]	[Not Available]	[Not Available]	[Not Available]	C73	mar-60	C73.9	YES	[Not Available]	Ultrasound	YES	[Not Available]	[Not Available]	[Not Available]	2.5	3.0	2.5	[Not Available]	[Not Available]	[Not Available]	[Not Applicable]	MX	NX
364	TCGA-ET-A3BO	44	[Not Applicable]	C115DF9D-CEC4-4D7A-87F0-36A5C1F1D51F	[Not Available]	[Not Applicable]	[Not Applicable]	[Not Applicable]	[Not Applicable]	2012-01-09	-16110	[Not Applicable]	0	177	[Not Applicable]	NOT HISPANIC OR LATINO	[Not Applicable]	Minimal (T3)	[Not Available]	FEMALE	NO	[Not Available]|[Not Available]|[Not Available]	[Not Applicable]	Thyroid Papillary Carcinoma - Tall Cell (>= 50% tall cell features)	[Not Applicable]	No	[Not Available]	[Not Available]	[Not Available]	[Not Available]	C73	mar-44	C73.9	YES	10	[Not Available]	NO	[Not Available]	[Not Available]	[Not Available]	1.3	2.5	1.5	[Not Available]	2	[Not Available]	[Not Applicable]	MX	N1a
365	TCGA-ET-A3BP	34	[Not Applicable]	9382942C-40DC-404A-AD8A-697612CDB575	[Not Available]	[Not Applicable]	[Not Applicable]	[Not Applicable]	[Not Applicable]	2012-01-06	-12594	[Not Applicable]	0	127	[Not Applicable]	HISPANIC OR LATINO	[Not Applicable]	None	[Not Available]	FEMALE	NO	[Not Available]|[Not Available]|[Not Available]	[Not Applicable]	Thyroid Papillary Carcinoma - Classical/usual	[Not Applicable]	No	[Not Available]	[Not Available]	[Not Available]	[Not Available]	C73	mar-60	C73.9	YES	3	Ultrasound	YES	[Not Available]	[Not Available]	[Not Available]	1.5	2.5	2.5	[Not Available]	2	[Not Available]	[Not Applicable]	MX	N1a
366	TCGA-ET-A3BQ	27	[Not Applicable]	5A6B9340-ACDE-4D97-8836-20AE29732851	[Not Available]	[Not Applicable]	[Not Applicable]	[Not Applicable]	[Not Applicable]	2012-01-10	-10034	[Not Applicable]	0	74	[Not Applicable]	NOT HISPANIC OR LATINO	[Not Applicable]	None	[Not Available]	FEMALE	NO	[Not Available]|[Not Available]|[Not Available]	[Not Applicable]	Thyroid Papillary Carcinoma - Classical/usual	[Not Applicable]	No	[Not Available]	[Not Available]	[Not Available]	[Not Available]	C73	mar-60	C73.9	YES	2	Ultrasound	YES	[Not Available]	[Not Available]	[Not Available]	1.5	3.0	2.0	[Not Available]	0	[Not Available]	[Not Applicable]	MX	N0
367	TCGA-ET-A3BS	42	[Not Applicable]	C83FB5E6-8AF3-47E4-AE48-CEE92DFF9DB7	[Not Available]	[Not Applicable]	[Not Applicable]	[Not Applicable]	[Not Applicable]	2012-01-09	-15421	[Not Applicable]	0	168	[Not Applicable]	NOT HISPANIC OR LATINO	[Not Applicable]	Minimal (T3)	[Not Available]	MALE	NO	[Not Available]|[Not Available]|[Not Available]	[Not Applicable]	Thyroid Papillary Carcinoma - Classical/usual	[Not Applicable]	No	[Not Available]	[Not Available]	[Not Available]	[Not Available]	C73	mar-60	C73.9	YES	17	Ultrasound	YES	[Not Available]	[Not Available]	[Not Available]	3.0	5.5	5.0	[Not Available]	8	[Not Available]	[Not Applicable]	MX	N1a
368	TCGA-ET-A3BT	60	[Not Applicable]	D84312E8-999D-49AD-B0AA-E48E87EFC462	[Not Available]	[Not Applicable]	[Not Applicable]	[Not Applicable]	[Not Applicable]	2012-01-10	-22108	[Not Applicable]	0	752	[Not Applicable]	NOT HISPANIC OR LATINO	[Not Applicable]	None	[Not Available]	FEMALE	NO	[Not Available]|[Not Available]|[Not Available]	[Not Applicable]	Thyroid Papillary Carcinoma - Tall Cell (>= 50% tall cell features)	[Not Applicable]	No	[Not Available]	[Not Available]	[Not Available]	[Not Available]	C73	mar-44	C73.9	YES	7	Ultrasound	YES	[Not Available]	[Not Available]	[Not Available]	1.3	2.5	1.8	[Not Available]	2	[Not Available]	[Not Applicable]	MX	N1b
369	TCGA-ET-A3BU	28	[Not Applicable]	46239F1E-BD85-4D7A-A313-762666599A6D	[Not Available]	[Not Applicable]	[Not Applicable]	[Not Applicable]	[Not Applicable]	2012-01-06	-10509	[Not Applicable]	0	39	[Not Applicable]	NOT HISPANIC OR LATINO	[Not Applicable]	None	[Not Available]	MALE	NO	[Not Available]|[Not Available]|[Not Available]	[Not Applicable]	Thyroid Papillary Carcinoma - Classical/usual	[Not Applicable]	No	[Not Available]	[Not Available]	[Not Available]	[Not Available]	C73	mar-60	C73.9	YES	9	Ultrasound	YES	[Not Available]	[Not Available]	[Not Available]	1.0	1.4	1.0	[Not Available]	6	[Not Available]	[Not Applicable]	MX	N1a
371	TCGA-ET-A3BW	30	[Not Applicable]	2CB43652-109B-4B59-9FCD-512903591F45	[Not Available]	[Not Applicable]	[Not Applicable]	[Not Applicable]	[Not Applicable]	2012-01-05	-11031	[Not Applicable]	0	72	[Not Applicable]	NOT HISPANIC OR LATINO	[Not Applicable]	None	[Not Available]	FEMALE	NO	[Not Available]|[Not Available]|[Not Available]	[Not Applicable]	Thyroid Papillary Carcinoma - Classical/usual	[Not Applicable]	No	[Not Available]	[Not Available]	[Not Available]	[Not Available]	C73	mar-60	C73.9	YES	[Not Available]	Ultrasound	YES	[Not Available]	[Not Available]	[Not Available]	2.0	3.2	3.0	[Not Available]	[Not Available]	[Not Available]	[Not Applicable]	MX	NX
372	TCGA-ET-A3BX	24	[Not Applicable]	8A02F305-6FD8-4908-BC19-06BABF028B5B	[Not Available]	[Not Applicable]	[Not Applicable]	[Not Applicable]	[Not Applicable]	2012-01-05	-8791	[Not Applicable]	0	137	[Not Applicable]	HISPANIC OR LATINO	[Not Applicable]	Minimal (T3)	[Not Available]	MALE	NO	[Not Available]|[Not Available]|[Not Available]	[Not Applicable]	Thyroid Papillary Carcinoma - Classical/usual	[Not Applicable]	No	[Not Available]	[Not Available]	[Not Available]	[Not Available]	C73	mar-60	C73.9	YES	4	[Not Available]	NO	[Not Available]	[Not Available]	[Not Available]	4.0	5.0	5.0	[Not Available]	1	[Not Available]	[Not Applicable]	MX	N1a
373	TCGA-ET-A3DO	33	[Not Applicable]	0CAFEFEF-911B-46E8-9E6C-19A0E7D555AA	[Not Available]	[Not Applicable]	[Not Applicable]	[Not Applicable]	[Not Applicable]	2011-12-15	-12157	[Not Applicable]	0	2095	[Not Applicable]	NOT HISPANIC OR LATINO	[Not Applicable]	None	[Not Available]	FEMALE	NO	[Not Available]|[Not Available]|[Not Available]	[Not Applicable]	Thyroid Papillary Carcinoma - Classical/usual	[Not Applicable]	No	[Not Available]	[Not Available]	[Not Available]	[Not Available]	C73	mar-60	C73.9	YES	[Not Available]	[Not Available]	NO	[Not Available]	[Not Available]	[Not Available]	1.5	2.5	1.8	[Not Available]	[Not Available]	[Not Available]	[Not Applicable]	MX	NX
374	TCGA-ET-A3DP	43	[Not Applicable]	18A58E3E-F18E-45CF-86BC-1851ABB9B3DE	[Not Available]	[Not Applicable]	[Not Applicable]	[Not Applicable]	[Not Applicable]	2011-12-16	-15875	[Not Applicable]	0	1536	[Not Applicable]	NOT HISPANIC OR LATINO	[Not Applicable]	None	[Not Available]	FEMALE	NO	[Not Available]|[Not Available]|[Not Available]	[Not Applicable]	Thyroid Papillary Carcinoma - Classical/usual	[Not Applicable]	No	[Not Available]	[Not Available]	[Not Available]	[Not Available]	C73	mar-60	C73.9	YES	[Not Available]	[Not Available]	NO	[Not Available]	[Not Available]	[Not Available]	[Not Available]	2.5	[Not Available]	[Not Available]	[Not Available]	[Not Available]	[Not Applicable]	MX	NX
375	TCGA-ET-A3DQ	43	[Not Applicable]	F9217C58-11EF-4C4B-99CF-0E134A718552	[Not Available]	[Not Applicable]	[Not Applicable]	[Not Applicable]	[Not Applicable]	2012-01-09	-15871	[Not Applicable]	0	1366	[Not Applicable]	NOT HISPANIC OR LATINO	[Not Applicable]	None	[Not Available]	FEMALE	NO	[Not Available]|[Not Available]|[Not Available]	[Not Applicable]	Thyroid Papillary Carcinoma - Follicular (>= 99% follicular patterned)	[Not Applicable]	No	[Not Available]	[Not Available]	[Not Available]	[Not Available]	C73	mar-40	C73.9	YES	2	Ultrasound	YES	[Not Available]	[Not Available]	[Not Available]	[Not Available]	1.0	[Not Available]	[Not Available]	0	[Not Available]	[Not Applicable]	MX	N0
376	TCGA-ET-A3DR	42	[Not Applicable]	A061976D-BA2C-4A18-A51E-952F198EB4D5	[Not Available]	[Not Applicable]	[Not Applicable]	[Not Applicable]	[Not Applicable]	2012-01-10	-15403	[Not Applicable]	0	65	[Not Applicable]	NOT HISPANIC OR LATINO	[Not Applicable]	None	[Not Available]	FEMALE	NO	[Not Available]|[Not Available]|[Not Available]	[Not Applicable]	Thyroid Papillary Carcinoma - Classical/usual	[Not Applicable]	No	[Not Available]	[Not Available]	[Not Available]	[Not Available]	C73	mar-60	C73.9	YES	6	Ultrasound	YES	[Not Available]	[Not Available]	[Not Available]	[Not Available]	1.2	[Not Available]	[Not Available]	5	[Not Available]	[Not Applicable]	MX	N1a
377	TCGA-ET-A3DS	33	[Not Applicable]	5CDAA0C8-27B8-4552-9DCD-20D67B1EB70F	[Not Available]	[Not Applicable]	[Not Applicable]	[Not Applicable]	[Not Applicable]	2012-01-05	-12251	[Not Applicable]	0	9	[Not Applicable]	NOT HISPANIC OR LATINO	[Not Applicable]	None	[Not Available]	FEMALE	NO	[Not Available]|[Not Available]|[Not Available]	[Not Applicable]	Thyroid Papillary Carcinoma - Classical/usual	[Not Applicable]	No	[Not Available]	[Not Available]	[Not Available]	[Not Available]	C73	mar-60	C73.9	YES	8	[Not Available]	NO	[Not Available]	[Not Available]	[Not Available]	0.5	0.8	0.6	[Not Available]	0	[Not Available]	[Not Applicable]	MX	N0
378	TCGA-ET-A3DT	23	[Not Applicable]	9FF3F335-69D1-4CAA-A5C5-EE66F4F92D17	[Not Available]	[Not Applicable]	[Not Applicable]	[Not Applicable]	[Not Applicable]	2012-01-05	-8761	[Not Applicable]	0	145	[Not Applicable]	NOT HISPANIC OR LATINO	[Not Applicable]	None	[Not Available]	FEMALE	NO	[Not Available]|[Not Available]|[Not Available]	[Not Applicable]	Thyroid Papillary Carcinoma - Classical/usual	[Not Applicable]	No	[Not Available]	[Not Available]	[Not Available]	[Not Available]	C73	mar-60	C73.9	YES	4	[Not Available]	NO	[Not Available]	[Not Available]	[Not Available]	2.0	2.5	2.0	[Not Available]	1	[Not Available]	[Not Applicable]	MX	N1a
380	TCGA-ET-A3DV	68	[Not Applicable]	B46D88E9-8477-4900-8DA9-5E7DBDED0653	[Not Available]	[Not Applicable]	[Not Applicable]	[Not Applicable]	[Not Applicable]	2012-01-09	-24904	[Not Applicable]	0	3424	[Not Applicable]	NOT HISPANIC OR LATINO	[Not Applicable]	Minimal (T3)	[Not Available]	FEMALE	NO	[Not Available]|[Not Available]|[Not Available]	[Not Applicable]	Thyroid Papillary Carcinoma - Follicular (>= 99% follicular patterned)	[Not Applicable]	No	[Not Available]	[Not Available]	[Not Available]	[Not Available]	C73	mar-40	C73.9	YES	1	[Not Available]	NO	[Not Available]	[Not Available]	[Not Available]	[Not Available]	4.2	[Not Available]	[Not Available]	0	[Not Available]	[Not Applicable]	MX	N0
381	TCGA-ET-A3DW	64	[Not Applicable]	424DE829-9EFD-4689-AC5D-24485A5D5ECF	[Not Available]	[Not Applicable]	[Not Applicable]	[Not Applicable]	[Not Applicable]	2012-01-10	-23603	[Not Applicable]	0	751	[Not Applicable]	NOT HISPANIC OR LATINO	[Not Applicable]	None	[Not Available]	MALE	NO	[Not Available]|[Not Available]|[Not Available]	[Not Applicable]	Thyroid Papillary Carcinoma - Tall Cell (>= 50% tall cell features)	[Not Applicable]	No	[Not Available]	[Not Available]	[Not Available]	[Not Available]	C73	mar-44	C73.9	YES	1	[Not Available]	NO	[Not Available]	[Not Available]	[Not Available]	[Not Available]	2.7	[Not Available]	[Not Available]	1	[Not Available]	[Not Applicable]	MX	N1
382	TCGA-ET-A40P	32	[Not Applicable]	7B49F263-FA0D-4F1B-9C00-1FF7A8C9AC79	[Not Available]	[Not Applicable]	[Not Applicable]	[Not Applicable]	[Not Applicable]	2012-09-30	-11842	[Not Applicable]	0	98	[Not Applicable]	NOT HISPANIC OR LATINO	[Not Applicable]	None	Sibling	FEMALE	NO	[Not Evaluated]|[Not Evaluated]|[Not Evaluated]	[Not Applicable]	Thyroid Papillary Carcinoma - Follicular (>= 99% follicular patterned)	[Not Applicable]	No	[Not Available]|[Not Available]	[Not Available]|[Not Available]	[Not Available]|[Not Available]	[Not Available]|[Not Available]	C73	mar-40	C73.9	YES	1	Ultrasound	YES	[Not Available]	[Not Available]	[Not Available]	2.2	3.2	2.5	NO	0	[Not Available]	[Not Applicable]	MX	N0
383	TCGA-ET-A40Q	38	[Not Applicable]	6BEFDC6A-27FC-4CDE-979B-FFE05CD8603F	[Not Available]	[Not Applicable]	[Not Applicable]	[Not Applicable]	[Not Applicable]	2012-09-30	-14136	[Not Applicable]	0	218	[Not Applicable]	NOT HISPANIC OR LATINO	[Not Applicable]	Minimal (T3)	[Unknown]	MALE	NO	[Not Evaluated]|[Not Evaluated]|[Not Evaluated]	[Not Applicable]	Thyroid Papillary Carcinoma - Tall Cell (>= 50% tall cell features)	[Not Applicable]	No	[Not Available]|[Not Available]	[Not Available]|[Not Available]	[Not Available]|[Not Available]	[Unknown]|[Not Available]	C73	mar-44	C73.9	YES	40	Ultrasound	YES	[Not Available]	[Not Available]	[Not Available]	1.5	2.5	2.0	NO	19	[Not Available]	[Not Applicable]	MX	N1b
384	TCGA-ET-A40R	24	[Not Applicable]	2513AB46-646C-4750-AB42-DE3940890553	[Not Available]	[Not Applicable]	[Not Applicable]	[Not Applicable]	[Not Applicable]	2012-09-30	-8962	[Not Applicable]	0	146	[Not Applicable]	NOT HISPANIC OR LATINO	[Not Applicable]	None	[Not Available]	FEMALE	NO	[Not Evaluated]|[Not Evaluated]|[Not Evaluated]	[Not Applicable]	Thyroid Papillary Carcinoma - Follicular (>= 99% follicular patterned)	[Not Applicable]	No	[Not Available]|[Not Available]	[Not Available]|[Not Available]	[Not Available]|[Not Available]	[Unknown]|[Not Available]	C73	mar-40	C73.9	YES	20	Ultrasound	YES	[Not Available]	[Not Available]	[Not Available]	2.0	3.0	3.0	NO	7	[Not Available]	[Not Applicable]	MX	N1a
385	TCGA-ET-A40S	62	[Not Applicable]	C8D62754-1601-40C0-98EF-E5BB94306B92	[Not Available]	[Not Applicable]	[Not Applicable]	[Not Applicable]	[Not Applicable]	2012-09-30	-22733	[Not Applicable]	0	152	[Not Applicable]	NOT HISPANIC OR LATINO	[Not Applicable]	None	Sibling	MALE	NO	[Not Evaluated]|[Not Evaluated]|[Not Evaluated]	[Not Applicable]	Thyroid Papillary Carcinoma - Classical/usual	[Not Applicable]	No	[Not Available]|[Not Available]	[Not Available]|[Not Available]	[Not Available]|[Not Available]	[Not Available]|[Not Available]	C73	mar-60	C73.9	YES	12	Ultrasound	YES	[Not Available]	[Not Available]	[Not Available]	2.0	2.5	2.0	NO	0	[Not Available]	[Not Applicable]	MX	N0
386	TCGA-ET-A40T	26	[Not Applicable]	2CAE34A6-73A0-4A67-8DCC-051468C41389	[Not Available]	[Not Applicable]	[Not Applicable]	[Not Applicable]	[Not Applicable]	2012-10-01	-9531	[Not Applicable]	0	64	[Not Applicable]	NOT HISPANIC OR LATINO	[Not Applicable]	None	[Not Available]	FEMALE	NO	[Not Evaluated]|[Not Evaluated]|[Not Evaluated]	[Not Applicable]	Thyroid Papillary Carcinoma - Classical/usual	[Not Applicable]	No	[Not Available]|[Not Available]	[Not Available]|[Not Available]	[Not Available]|[Not Available]	[Not Available]|[Not Available]	C73	mar-60	C73.9	YES	15	Ultrasound	YES	[Not Available]	[Not Available]	[Not Available]	[Not Available]	2.8	[Not Available]	NO	3	[Not Available]	[Not Applicable]	MX	N1a
387	TCGA-ET-A4KN	51	[Not Applicable]	7629F864-A009-4AA9-BF7E-2D99E00D294E	[Not Available]	[Not Applicable]	[Not Applicable]	[Not Applicable]	[Not Applicable]	2013-01-08	-18889	[Not Applicable]	0	122	[Not Applicable]	[Unknown]	[Not Applicable]	Minimal (T3)	[Not Available]	FEMALE	NO	[Not Evaluated]|[Not Evaluated]|[Not Evaluated]	[Not Applicable]	Thyroid Papillary Carcinoma - Tall Cell (>= 50% tall cell features)	[Not Applicable]	No	49.7 millicuries|[Not Available]	[Not Available]|[Not Available]	[Not Available]|[Not Available]	rhTSH|[Not Available]	C73	mar-44	C73.9	YES	4	[Not Available]	NO	[Not Available]	[Not Available]	[Not Available]	1.5	2.0	2.0	NO	0	[Not Available]	[Not Applicable]	MX	N0
388	TCGA-ET-A4KQ	45	[Not Applicable]	29963391-3926-4B7C-8066-185F0F2D5BFC	[Not Available]	[Not Applicable]	[Not Applicable]	[Not Applicable]	[Not Applicable]	2013-01-08	-16684	[Not Applicable]	0	59	[Not Applicable]	[Unknown]	[Not Applicable]	None	Parent	FEMALE	NO	[Not Evaluated]|[Not Evaluated]|[Not Evaluated]	[Not Applicable]	Thyroid Papillary Carcinoma - Follicular (>= 99% follicular patterned)	[Not Applicable]	No	[Not Available]|[Not Available]	[Not Available]|[Not Available]	[Not Available]|[Not Available]	Patient did not receive I-131 treatment|[Not Available]	C73	mar-40	C73.9	YES	[Not Available]	[Not Available]	NO	[Not Available]	[Not Available]	[Not Available]	3	4	4	NO	[Not Available]	[Not Available]	[Not Applicable]	MX	NX
389	TCGA-FE-A22Z	61	[Not Applicable]	78d14f86-896a-4f98-9274-b2e8e387add9	[Not Available]	[Not Applicable]	[Not Applicable]	[Not Applicable]	[Not Applicable]	2011-08-11	-22286	[Not Applicable]	0	1565	[Not Applicable]	NOT HISPANIC OR LATINO	[Not Applicable]	Moderate/Advanced (T4a)	[Not Available]	FEMALE	NO	[Not Evaluated]|[Not Evaluated]|[Not Evaluated]	[Not Applicable]	Thyroid Papillary Carcinoma - Follicular (>= 99% follicular patterned)	[Not Applicable]	No	[Not Available]	[Not Available]	[Not Available]	[Not Available]	C73	mar-40	C73.9	YES	6	MRI with contrast	YES	[Not Available]	[Not Available]	[Not Available]	3.0	6.5	5.0	[Not Available]	5	[Not Available]	[Not Applicable]	MX	N1
390	TCGA-FE-A230	30	[Not Applicable]	b1d71782-2443-43f3-bd0e-8b7220515cb6	[Not Available]	[Not Applicable]	[Not Applicable]	[Not Applicable]	[Not Applicable]	2011-08-11	-10999	[Not Applicable]	0	1442	[Not Applicable]	NOT HISPANIC OR LATINO	[Not Applicable]	None	[Not Available]	FEMALE	NO	[Not Evaluated]|[Not Evaluated]|[Not Evaluated]	[Not Applicable]	Thyroid Papillary Carcinoma - Classical/usual	[Not Applicable]	No	[Not Available]	[Not Available]	[Not Available]	[Not Available]	C73	mar-60	C73.9	YES	3	[Not Available]	NO	[Not Available]	[Not Available]	[Not Available]	2.2	4.4	4.0	[Not Available]	3	[Not Available]	[Not Applicable]	MX	N1a
391	TCGA-FE-A231	70	[Not Applicable]	7044dee0-fd6c-4e75-b731-dc60a386a1ab	[Not Available]	[Not Applicable]	[Not Applicable]	[Not Applicable]	[Not Applicable]	2011-08-11	-25702	[Not Applicable]	0	374	[Not Applicable]	NOT HISPANIC OR LATINO	[Not Applicable]	None	[Not Available]	MALE	NO	[Not Evaluated]|[Not Evaluated]|[Not Evaluated]	[Not Applicable]	Thyroid Papillary Carcinoma - Classical/usual	[Not Applicable]	No	[Not Available]	[Not Available]	[Not Available]	[Not Available]	C73	mar-60	C73.9	YES	31	Ultrasound	YES	[Not Available]	[Not Available]	[Not Available]	[Not Available]	9.4	[Not Available]	[Not Available]	16	[Not Available]	[Not Applicable]	MX	N1b
393	TCGA-FE-A233	18	[Not Applicable]	e70feafd-1390-4f4c-a635-da65c1a7daeb	[Not Available]	[Not Applicable]	[Not Applicable]	[Not Applicable]	[Not Applicable]	2011-08-11	-6769	[Not Applicable]	0	751	[Not Applicable]	NOT HISPANIC OR LATINO	[Not Applicable]	None	[Not Available]	FEMALE	NO	[Not Evaluated]|[Not Evaluated]|[Not Evaluated]	[Not Applicable]	Thyroid Papillary Carcinoma - Classical/usual	[Not Applicable]	No	[Not Available]	[Not Available]	[Not Available]	[Not Available]	C73	mar-60	C73.9	YES	0	[Not Available]	NO	[Not Available]	[Not Available]	[Not Available]	1.5	2.3	2.2	[Not Available]	0	[Not Available]	[Not Applicable]	MX	NX
394	TCGA-FE-A234	26	[Not Applicable]	e4c85bdd-7b7c-414f-9503-647d9b825915	[Not Available]	[Not Applicable]	[Not Applicable]	[Not Applicable]	[Not Applicable]	2011-08-10	-9723	[Not Applicable]	0	1333	[Not Applicable]	NOT HISPANIC OR LATINO	[Not Applicable]	None	[Not Available]	FEMALE	NO	[Not Evaluated]|[Not Evaluated]|[Not Evaluated]	[Not Applicable]	Thyroid Papillary Carcinoma - Classical/usual	[Not Applicable]	No	[Not Available]	[Not Available]	[Not Available]	[Not Available]	C73	mar-60	C73.9	YES	2	[Not Available]	YES	[Not Available]	[Not Available]	[Not Available]	2.5	3.3	3	[Not Available]	2	[Not Available]	[Not Applicable]	MX	N1
395	TCGA-FE-A235	26	[Not Applicable]	c781b49e-d08f-49e6-b774-7cfe4100e92d	[Not Available]	[Not Applicable]	[Not Applicable]	[Not Applicable]	[Not Applicable]	2011-08-11	-9859	[Not Applicable]	0	3130	[Not Applicable]	NOT HISPANIC OR LATINO	[Not Applicable]	None	[Not Available]	FEMALE	NO	[Not Evaluated]|[Not Evaluated]|[Not Evaluated]	[Not Applicable]	Thyroid Papillary Carcinoma - Classical/usual	[Not Applicable]	No	[Not Available]	[Not Available]	[Not Available]	[Not Available]	C73	mar-60	C73.9	YES	4	Ultrasound	YES	[Not Available]	[Not Available]	[Not Available]	1.4	3.0	2.0	[Not Available]	3	[Not Available]	[Not Applicable]	MX	N1
396	TCGA-FE-A236	33	[Not Applicable]	300720c8-68e5-4a3b-a873-3ad36ad0f953	[Not Available]	[Not Applicable]	[Not Applicable]	[Not Applicable]	[Not Applicable]	2011-08-11	-12348	[Not Applicable]	0	2031	[Not Applicable]	NOT HISPANIC OR LATINO	[Not Applicable]	None	[Not Available]	MALE	NO	[Not Evaluated]|[Not Evaluated]|[Not Evaluated]	[Not Applicable]	Thyroid Papillary Carcinoma - Classical/usual	[Not Applicable]	No	[Not Available]	[Not Available]	[Not Available]	[Not Available]	C73	mar-60	C73.9	YES	5	[Not Available]	NO	[Not Available]	[Not Available]	[Not Available]	2.5	3.5	3.0	[Not Available]	5	[Not Available]	[Not Applicable]	MX	N1
397	TCGA-FE-A237	19	[Not Applicable]	7d11b016-c564-4fb5-9b85-1b1a0188006f	[Not Available]	[Not Applicable]	[Not Applicable]	[Not Applicable]	[Not Applicable]	2011-08-11	-7207	[Not Applicable]	0	2292	[Not Applicable]	NOT HISPANIC OR LATINO	[Not Applicable]	Minimal (T3)	[Not Available]	FEMALE	NO	[Not Evaluated]|[Not Evaluated]|[Not Evaluated]	[Not Applicable]	Thyroid Papillary Carcinoma - Classical/usual	[Not Applicable]	No	[Not Available]	[Not Available]	[Not Available]	[Not Available]	C73	mar-60	C73.9	YES	5	[Not Available]	NO	[Not Available]	[Not Available]	[Not Available]	3.0	3.5	3.0	[Not Available]	3	[Not Available]	[Not Applicable]	MX	N1
398	TCGA-FE-A238	36	[Not Applicable]	dffc4f7a-c67a-4ac5-a338-717dffde686d	[Not Available]	[Not Applicable]	[Not Applicable]	[Not Applicable]	[Not Applicable]	2011-08-11	-13158	[Not Applicable]	0	1215	[Not Applicable]	NOT HISPANIC OR LATINO	[Not Applicable]	Minimal (T3)	[Not Available]	FEMALE	NO	[Not Evaluated]|[Not Evaluated]|[Not Evaluated]	[Not Applicable]	Thyroid Papillary Carcinoma - Classical/usual	[Not Applicable]	No	[Not Available]	[Not Available]	[Not Available]	[Not Available]	C73	mar-60	C73.9	YES	1	[Not Available]	NO	Lung	RAI-avid|Imaging Suspected	[Not Available]	2.0	3.9	2.7	[Not Available]	0	[Not Available]	[Not Applicable]	MX	N0
399	TCGA-FE-A239	82	[Not Applicable]	fc70a652-7925-4759-8e1f-05fd56829df4	[Not Available]	[Not Applicable]	[Not Applicable]	[Not Applicable]	[Not Applicable]	2011-08-11	-30258	1023	0	[Not Available]	[Not Applicable]	NOT HISPANIC OR LATINO	[Not Applicable]	None	[Not Available]	MALE	NO	[Not Evaluated]|[Not Evaluated]|[Not Evaluated]	[Not Applicable]	Thyroid Papillary Carcinoma - Classical/usual	[Not Applicable]	No	[Not Available]	[Not Available]	[Not Available]	[Not Available]	C73	mar-60	C73.9	YES	2	Ultrasound	YES	[Not Available]	[Not Available]	[Not Available]	2.7	4.5	2.5	[Not Available]	0	[Not Available]	[Not Applicable]	MX	N0
400	TCGA-FE-A23A	27	[Not Applicable]	fd8c4ff3-e759-495f-96e7-1f406bb70190	[Not Available]	[Not Applicable]	[Not Applicable]	[Not Applicable]	[Not Applicable]	2011-08-10	-10177	[Not Applicable]	0	1907	[Not Applicable]	NOT HISPANIC OR LATINO	[Not Applicable]	None	[Not Available]	FEMALE	NO	[Not Evaluated]|[Not Evaluated]|[Not Evaluated]	[Not Applicable]	Thyroid Papillary Carcinoma - Classical/usual	[Not Applicable]	No	[Not Available]	[Not Available]	[Not Available]	[Not Available]	C73	mar-60	C73.9	YES	13	[Not Available]	NO	[Not Available]	[Not Available]	[Not Available]	2	2.7	2.2	[Not Available]	0	[Not Available]	[Not Applicable]	MX	N0
401	TCGA-FE-A3PA	16	[Not Applicable]	10BDAFBB-831D-48B5-B9A3-AD374FC50235	[Not Available]	[Not Applicable]	[Not Applicable]	[Not Applicable]	[Not Applicable]	2012-03-13	-6067	[Not Applicable]	0	2872	[Not Applicable]	NOT HISPANIC OR LATINO	[Not Applicable]	Minimal (T3)	[Not Available]	MALE	[Not Available]	[Not Available]|[Not Available]|[Not Available]	[Not Applicable]	Thyroid Papillary Carcinoma - Follicular (>= 99% follicular patterned)	[Not Applicable]	No	[Not Available]	[Not Available]	[Not Available]	[Not Available]	C73	mar-40	C73.9	YES	[Not Available]	[Not Available]	NO	Lung	RAI-avid	[Not Available]	3	4	3	[Not Available]	[Not Available]	[Not Available]	[Not Applicable]	M1	N0
402	TCGA-FE-A3PB	33	[Not Applicable]	05A8268A-6B33-429B-8638-8C9BB366EF28	[Not Available]	[Not Applicable]	[Not Applicable]	[Not Applicable]	[Not Applicable]	2012-03-13	-12136	[Not Applicable]	0	2589	[Not Applicable]	NOT HISPANIC OR LATINO	[Not Applicable]	Minimal (T3)	[Not Available]	FEMALE	[Not Available]	[Not Available]|[Not Available]|[Not Available]	[Not Applicable]	Thyroid Papillary Carcinoma - Classical/usual	[Not Applicable]	No	[Not Available]	[Not Available]	[Not Available]	[Not Available]	C73	mar-60	C73.9	YES	5	[Not Available]	NO	[Not Available]	[Not Available]	[Not Available]	0.6	1	0.7	[Not Available]	5	[Not Available]	[Not Applicable]	MX	N1a
403	TCGA-FE-A3PC	37	[Not Applicable]	A86AC3B5-B5E9-4420-8DE0-A358FCAD85B6	[Not Available]	[Not Applicable]	[Not Applicable]	[Not Applicable]	[Not Applicable]	2012-03-13	-13817	[Not Applicable]	0	1868	[Not Applicable]	NOT HISPANIC OR LATINO	[Not Applicable]	None	[Not Available]	FEMALE	NO	[Not Available]|[Not Available]|[Not Available]	[Not Applicable]	Thyroid Papillary Carcinoma - Classical/usual	[Not Applicable]	No	[Not Available]	[Not Available]	[Not Available]	[Not Available]	C73	mar-60	C73.9	YES	19	[Not Available]	NO	[Not Available]	[Not Available]	[Not Available]	2.0	5.2	3.5	[Not Available]	19	[Not Available]	[Not Applicable]	MX	N1
404	TCGA-FE-A3PD	17	[Not Applicable]	39D90499-8549-4DA5-B391-C421F18FACF1	[Not Available]	[Not Applicable]	[Not Applicable]	[Not Applicable]	[Not Applicable]	2012-03-13	-6385	[Not Applicable]	0	1913	[Not Applicable]	NOT HISPANIC OR LATINO	[Not Applicable]	None	[Not Available]	FEMALE	[Not Available]	[Not Available]|[Not Available]|[Not Available]	[Not Applicable]	Thyroid Papillary Carcinoma - Follicular (>= 99% follicular patterned)	[Not Applicable]	No	[Not Available]	[Not Available]	[Not Available]	[Not Available]	C73	mar-40	C73.9	YES	3	[Not Available]	NO	[Not Available]	[Not Available]	[Not Available]	1.7	2.3	1.8	[Not Available]	0	[Not Available]	[Not Applicable]	MX	N0
405	TCGA-FK-A3S3	43	[Not Applicable]	785803BB-42A8-4AFB-B7B4-58C114894408	[Not Available]	[Not Applicable]	[Not Applicable]	[Not Applicable]	[Not Applicable]	2012-09-18	-15852	[Not Applicable]	0	1401	[Not Applicable]	NOT HISPANIC OR LATINO	[Not Applicable]	Minimal (T3)	[Not Available]	FEMALE	[Not Available]	[Not Available]|[Not Available]|[Not Available]	[Not Applicable]	Thyroid Papillary Carcinoma - Follicular (>= 99% follicular patterned)	[Not Applicable]	No	106.4 mCi|[Not Available]	[Not Available]|[Not Available]	106.4 mCi|[Not Available]	Thyroxine withdrawal|[Not Available]	C73	mar-40	C73.9	YES	11	[Not Available]	NO	[Not Available]	[Not Available]	[Not Available]	[Not Available]	2.5	[Not Available]	NO	4	[Not Available]	[Not Applicable]	MX	N1b
406	TCGA-FK-A3SB	28	[Not Applicable]	8950691C-600F-4A90-ADF6-42A8F129AA3E	[Not Available]	[Not Applicable]	[Not Applicable]	[Not Applicable]	[Not Applicable]	2012-09-18	-10293	[Not Applicable]	0	124	[Not Applicable]	NOT HISPANIC OR LATINO	[Not Applicable]	Minimal (T3)	[Not Available]	FEMALE	NO	[Not Evaluated]|[Not Evaluated]|[Not Evaluated]	[Not Applicable]	Thyroid Papillary Carcinoma - Classical/usual	[Not Applicable]	No	[Not Available]|[Not Available]	[Not Available]|[Not Available]	[Not Available]|[Not Available]	[Unknown]|[Not Available]	C73	mar-60	C73.9	YES	14	[Not Available]	NO	[Not Available]	[Not Available]	[Not Available]	[Not Available]	2	[Not Available]	NO	2	[Not Available]	[Not Applicable]	MX	N1a
407	TCGA-FK-A3SD	61	[Not Applicable]	63B01B43-A68A-4046-89B0-736BA4D08504	[Not Available]	[Not Applicable]	[Not Applicable]	[Not Applicable]	[Not Applicable]	2012-09-18	-22560	[Not Applicable]	0	27	[Not Applicable]	NOT HISPANIC OR LATINO	[Not Applicable]	[Unknown]	[Not Available]	FEMALE	NO	[Not Evaluated]|[Not Evaluated]|[Not Evaluated]	[Not Applicable]	Thyroid Papillary Carcinoma - Classical/usual	[Not Applicable]	No	[Not Available]|[Not Available]	[Not Available]|[Not Available]	[Not Available]|[Not Available]	[Not Available]|[Not Available]	C73	mar-60	C73.9	YES	[Not Available]	[Not Available]	NO	[Not Available]	[Not Available]	[Not Available]	[Not Available]	0.1	[Not Available]	NO	[Not Available]	[Not Available]	[Not Applicable]	M0	N0
408	TCGA-FK-A3SE	31	[Not Applicable]	AFB00CD4-E5DA-4251-86FB-532C3F65324C	[Not Available]	[Not Applicable]	[Not Applicable]	[Not Applicable]	[Not Applicable]	2012-09-18	-11472	[Not Applicable]	0	669	[Not Applicable]	NOT HISPANIC OR LATINO	[Not Applicable]	None	[Not Available]	FEMALE	[Not Available]	[Not Available]|[Not Available]|[Not Available]	[Not Applicable]	Thyroid Papillary Carcinoma - Classical/usual	[Not Applicable]	No	75 millicuries|[Not Available]	[Not Available]|[Not Available]	75 millicuries|[Not Available]	Thyroxine withdrawal|[Not Available]	C73	mar-60	C73.9	YES	8	Ultrasound	YES	[Not Available]	[Not Available]	[Not Available]	[Not Available]	3.5	[Not Available]	NO	2	[Not Available]	[Not Applicable]	MX	N1a
409	TCGA-FK-A3SG	21	[Not Applicable]	8446BCBA-0DCD-42EB-96A1-00F5470C9F65	[Not Available]	[Not Applicable]	[Not Applicable]	[Not Applicable]	[Not Applicable]	2012-09-18	-7709	[Not Applicable]	0	28	[Not Applicable]	NOT HISPANIC OR LATINO	[Not Applicable]	None	[Not Available]	FEMALE	[Not Available]	[Not Available]|[Not Available]|[Not Available]	[Not Applicable]	Thyroid Papillary Carcinoma - Classical/usual	[Not Applicable]	No	[Not Available]|[Not Available]	[Not Available]|[Not Available]	[Not Available]|[Not Available]	[Not Available]|[Not Available]	C73	mar-60	C73.9	YES	14	[Not Available]	NO	[Not Available]	[Not Available]	[Not Available]	[Not Available]	3.2	[Not Available]	[Unknown]	6	[Not Available]	[Not Applicable]	MX	N1b
410	TCGA-FK-A3SH	50	[Not Applicable]	E48A8FA7-4E2B-44A0-95F5-E2925C60BAD3	[Not Available]	[Not Applicable]	[Not Applicable]	[Not Applicable]	[Not Applicable]	2012-09-18	-18609	[Not Applicable]	0	1463	[Not Applicable]	NOT HISPANIC OR LATINO	[Not Applicable]	None	Parent	FEMALE	[Not Available]	[Not Available]|[Not Available]|[Not Available]	[Not Applicable]	Thyroid Papillary Carcinoma - Classical/usual	[Not Applicable]	No	104.5 millicuries|[Not Available]	[Not Available]|[Not Available]	104.5 millicuries|[Not Available]	rhTSH|[Not Available]	C73	mar-60	C73.9	YES	8	[Not Available]	NO	[Not Available]	[Not Available]	[Not Available]	[Not Available]	3.0	[Not Available]	NO	2	[Not Available]	[Not Applicable]	MX	N1a
411	TCGA-FK-A4UB	51	[Not Applicable]	7CEC93DA-42C9-495D-8110-9FB43763041B	[Not Available]	[Not Applicable]	[Not Applicable]	[Not Applicable]	[Not Applicable]	2013-01-22	-18792	[Not Applicable]	0	2772	[Not Applicable]	NOT HISPANIC OR LATINO	[Not Applicable]	Minimal (T3)	[Not Available]	MALE	NO	[Not Evaluated]|[Not Evaluated]|[Not Evaluated]	[Not Applicable]	Thyroid Papillary Carcinoma - Classical/usual	[Not Applicable]	No	105-millicurie|[Not Available]	[Not Available]|[Not Available]	105-millicurie|[Not Available]	Thyroxine withdrawal|[Not Available]	C73	mar-60	C73.9	YES	85	Ultrasound|CT without contrast	YES	Other	Biopsy Proven	[Not Available]	[Not Available]	2	[Not Available]	NO	20	[Not Available]	Lymph node	MX	N1a
412	TCGA-FY-A2QD	61	[Not Applicable]	B0CB6ED7-3D9F-4D5E-8DF5-EDCC921C43B4	[Not Available]	[Not Applicable]	[Not Applicable]	[Not Applicable]	[Not Applicable]	2011-10-18	-22492	[Not Applicable]	0	38	[Not Applicable]	NOT HISPANIC OR LATINO	[Not Applicable]	None	[Not Available]	FEMALE	NO	[Not Evaluated]|[Not Evaluated]|[Not Evaluated]	[Not Applicable]	Thyroid Papillary Carcinoma - Classical/usual	[Not Applicable]	No	[Not Available]	[Not Available]	[Not Available]	[Not Available]	C73	mar-60	C73.9	YES	3	[Not Available]	[Not Available]	[Not Available]	[Not Available]	[Not Available]	2.5	6.0	3.3	[Not Available]	0	[Not Available]	[Not Applicable]	[Not Available]	N0
413	TCGA-FY-A3BL	29	[Not Applicable]	C6F08366-F30D-45BD-B949-B59D2493995D	[Not Available]	[Not Applicable]	[Not Applicable]	[Not Applicable]	[Not Applicable]	2012-02-03	-10652	[Not Applicable]	0	35	[Not Applicable]	NOT HISPANIC OR LATINO	[Not Applicable]	None	[Not Available]	MALE	[Not Available]	[Not Available]|[Not Available]|[Not Available]	[Not Applicable]	Thyroid Papillary Carcinoma - Classical/usual	[Not Applicable]	No	[Not Available]	[Not Available]	[Not Available]	[Not Available]	C73	mar-60	C73.9	YES	[Not Available]	[Not Available]	[Not Available]	[Not Available]	[Not Available]	[Not Available]	[Not Available]	[Not Available]	1.3	[Not Available]	[Not Available]	[Not Available]	[Not Applicable]	M0	NX
414	TCGA-FY-A3I4	34	[Not Applicable]	CD1656D8-55A5-4248-B81D-FED9D5992CBE	[Not Available]	[Not Applicable]	[Not Applicable]	[Not Applicable]	[Not Applicable]	2012-04-17	-12660	[Not Applicable]	0	34	[Not Applicable]	NOT HISPANIC OR LATINO	[Not Applicable]	None	[Not Available]	FEMALE	[Not Available]	[Not Available]|[Not Available]|[Not Available]	[Not Applicable]	Thyroid Papillary Carcinoma - Classical/usual	[Not Applicable]	No	[Not Available]	[Not Available]	[Not Available]	[Not Available]	C73	mar-60	C73.9	YES	1	[Not Available]	[Not Available]	[Not Available]	[Not Available]	[Not Available]	2.4	3.8	4	[Not Available]	0	[Not Available]	[Not Applicable]	M0	N0
415	TCGA-FY-A3I5	64	[Not Applicable]	52203FF5-57B2-4D56-8935-2FF1EB61D7B8	[Not Available]	[Not Applicable]	[Not Applicable]	[Not Applicable]	[Not Applicable]	2012-09-24	-23649	[Not Applicable]	0	50	[Not Applicable]	NOT HISPANIC OR LATINO	[Not Applicable]	None	[Not Available]	FEMALE	[Not Available]	[Not Available]|[Not Available]|[Not Available]	[Not Applicable]	Thyroid Papillary Carcinoma - Follicular (>= 99% follicular patterned)	[Not Applicable]	No	[Not Available]|[Not Available]	[Not Available]|[Not Available]	[Not Available]|[Not Available]	[Not Available]|[Not Available]	C73	mar-40	C73.9	YES	14	[Not Available]	[Unknown]	[Not Available]	[Not Available]	[Not Available]	3.0	4.5	3.0	NO	0	[Not Available]	[Not Applicable]	MX	N0
416	TCGA-FY-A3NM	48	[Not Applicable]	F7F6E9F4-1AA8-48A0-BEA9-EFAA9379F6F6	[Not Available]	[Not Applicable]	[Not Applicable]	[Not Applicable]	[Not Applicable]	2012-04-19	-17745	[Not Applicable]	0	30	[Not Applicable]	NOT HISPANIC OR LATINO	[Not Applicable]	Minimal (T3)	[Not Available]	FEMALE	[Not Available]	[Not Available]|[Not Available]|[Not Available]	[Not Applicable]	Thyroid Papillary Carcinoma - Classical/usual	[Not Applicable]	No	[Not Available]	[Not Available]	[Not Available]	[Not Available]	C73	mar-60	C73.9	YES	6	Ultrasound	YES	[Not Available]	[Not Available]	[Not Available]	[Not Available]	[Not Available]	[Not Available]	[Not Available]	0	[Not Available]	[Not Applicable]	MX	N0
417	TCGA-FY-A3NN	48	[Not Applicable]	B3B7D701-EC84-4018-A3CE-F59198B35767	[Not Available]	[Not Applicable]	[Not Applicable]	[Not Applicable]	[Not Applicable]	2012-04-19	-17624	[Not Applicable]	0	0	[Not Applicable]	[Not Available]	[Not Applicable]	None	[Not Available]	FEMALE	[Not Available]	[Not Available]|[Not Available]|[Not Available]	[Not Applicable]	Thyroid Papillary Carcinoma - Classical/usual	[Not Applicable]	No	[Not Available]	[Not Available]	[Not Available]	[Not Available]	C73	mar-40	C73.9	YES	4	Ultrasound	YES	[Not Available]	[Not Available]	[Not Available]	[Not Available]	2.0	[Not Available]	[Not Available]	2	[Not Available]	[Not Applicable]	MX	N1a
418	TCGA-FY-A3NP	69	[Not Applicable]	029DA211-9B52-45AD-B0DC-2322DA783C9C	[Not Available]	[Not Applicable]	[Not Applicable]	[Not Applicable]	[Not Applicable]	2012-04-19	-25474	[Not Applicable]	0	18	[Not Applicable]	NOT HISPANIC OR LATINO	[Not Applicable]	None	[Not Available]	MALE	[Not Available]	[Not Available]|[Not Available]|[Not Available]	[Not Applicable]	Thyroid Papillary Carcinoma - Follicular (>= 99% follicular patterned)	[Not Applicable]	No	[Not Available]	[Not Available]	[Not Available]	[Not Available]	C73	mar-40	C73.9	YES	[Not Available]	CT without contrast	YES	[Not Available]	[Not Available]	[Not Available]	[Not Available]	2.0	[Not Available]	[Not Available]	[Not Available]	[Not Available]	[Not Applicable]	M0	N0
419	TCGA-FY-A3ON	20	[Not Applicable]	4D1AEC67-C345-4721-8EE8-356B0DFF009B	[Not Available]	[Not Applicable]	[Not Applicable]	[Not Applicable]	[Not Applicable]	2012-04-19	-7397	[Not Applicable]	0	46	[Not Applicable]	HISPANIC OR LATINO	[Not Applicable]	None	[Not Available]	MALE	[Not Available]	[Not Available]|[Not Available]|[Not Available]	[Not Applicable]	Thyroid Papillary Carcinoma - Classical/usual	[Not Applicable]	No	[Not Available]	[Not Available]	[Not Available]	[Not Available]	C73	mar-60	C73.9	YES	4	[Not Available]	[Not Available]	[Not Available]	[Not Available]	[Not Available]	1.5	2.5	1.8	[Not Available]	1	[Not Available]	[Not Applicable]	MX	N1
420	TCGA-FY-A3R6	57	[Not Applicable]	905469D2-4C97-4293-A20C-1B1F0462A25D	[Not Available]	[Not Applicable]	[Not Applicable]	[Not Applicable]	[Not Applicable]	2012-09-28	-21003	[Not Applicable]	0	23	[Not Applicable]	NOT HISPANIC OR LATINO	[Not Applicable]	None	[Not Available]	FEMALE	[Not Available]	[Not Available]|[Not Available]|[Not Available]	[Not Applicable]	Thyroid Papillary Carcinoma - Classical/usual	[Not Applicable]	No	[Not Available]|[Not Available]	[Not Available]|[Not Available]	[Not Available]|[Not Available]	[Not Available]|[Not Available]	C73	mar-60	C73.9	YES	30	Ultrasound	YES	[Not Available]	[Not Available]	[Not Available]	[Not Available]	2.2	[Not Available]	NO	5	[Not Available]	[Not Applicable]	MX	N1b
421	TCGA-FY-A3R7	50	[Not Applicable]	B983A678-B0AE-42C2-8F37-D6ECAF07413B	[Not Available]	[Not Applicable]	[Not Applicable]	[Not Applicable]	[Not Applicable]	2012-09-28	-18415	[Not Applicable]	0	1	[Not Applicable]	NOT HISPANIC OR LATINO	[Not Applicable]	Minimal (T3)	[Not Available]	FEMALE	[Not Available]	[Not Available]|[Not Available]|[Not Available]	[Not Applicable]	Thyroid Papillary Carcinoma - Classical/usual	[Not Applicable]	No	[Not Available]|[Not Available]	[Not Available]|[Not Available]	[Not Available]|[Not Available]	[Not Available]|[Not Available]	C73	mar-60	C73.9	YES	2	Ultrasound	YES	[Not Available]	[Not Available]	[Not Available]	[Not Available]	2.0	[Not Available]	NO	2	[Not Available]	[Not Applicable]	MX	N1a
422	TCGA-FY-A3R8	62	[Not Applicable]	C77976B6-35EA-4623-A92A-6D9440A978E6	[Not Available]	[Not Applicable]	[Not Applicable]	[Not Applicable]	[Not Applicable]	2012-10-08	-22829	[Not Applicable]	0	141	[Not Applicable]	NOT HISPANIC OR LATINO	[Not Applicable]	Minimal (T3)	[Not Available]	FEMALE	[Not Available]	[Not Available]|[Not Available]|[Not Available]	[Not Applicable]	Thyroid Papillary Carcinoma - Classical/usual	[Not Applicable]	No	1.9 mCi|[Not Available]	[Not Available]|[Not Available]	1.9 mCi|[Not Available]	rhTSH|[Not Available]	C73	mar-60	C73.9	YES	[Not Available]	[Not Available]	NO	[Not Available]	[Not Available]	[Not Available]	0.9	1.7	1.4	NO	[Not Available]	[Not Available]	[Not Applicable]	MX	NX
423	TCGA-FY-A3R9	66	[Not Applicable]	D92902FF-8023-411C-A7CA-1AFCBB64937E	[Not Available]	[Not Applicable]	[Not Applicable]	[Not Applicable]	[Not Applicable]	2012-10-01	-24229	[Not Applicable]	0	66	[Not Applicable]	NOT HISPANIC OR LATINO	[Not Applicable]	None	[Not Available]	FEMALE	[Not Available]	[Not Available]|[Not Available]|[Not Available]	[Not Applicable]	Thyroid Papillary Carcinoma - Classical/usual	[Not Applicable]	No	[Not Available]|[Not Available]	[Not Available]|[Not Available]	[Not Available]|[Not Available]	[Not Available]|[Not Available]	C73	mar-40	C73.9	YES	1	[Not Available]	NO	[Not Available]	[Not Available]	[Not Available]	[Not Available]	0.7	[Not Available]	NO	0	[Not Available]	[Not Applicable]	MX	N0
424	TCGA-FY-A3RA	21	[Not Applicable]	58FF4366-20A3-40A2-A87A-551E17CDB5D3	[Not Available]	[Not Applicable]	[Not Applicable]	[Not Applicable]	[Not Applicable]	2012-09-24	-7912	[Not Applicable]	0	278	[Not Applicable]	NOT HISPANIC OR LATINO	[Not Applicable]	None	[Not Available]	FEMALE	[Not Available]	[Not Available]|[Not Available]|[Not Available]	[Not Applicable]	Thyroid Papillary Carcinoma - Classical/usual	[Not Applicable]	No	101.4 mCi|[Not Available]	[Not Available]|[Not Available]	[Not Available]|[Not Available]	rhTSH|[Not Available]	C73	mar-60	C73.9	YES	[Not Available]	Ultrasound	YES	[Not Available]	[Not Available]	[Not Available]	[Not Available]	4.0	[Not Available]	NO	[Not Available]	[Not Available]	[Not Applicable]	MX	NX
425	TCGA-FY-A3TY	61	[Not Applicable]	53BA15C0-780E-4153-A612-046F1B24B4B3	[Not Available]	[Not Applicable]	[Not Applicable]	[Not Applicable]	[Not Applicable]	2012-08-06	-22556	[Not Applicable]	0	0	[Not Applicable]	[Not Available]	[Not Applicable]	Minimal (T3)	[Unknown]	FEMALE	[Not Available]	[Not Available]|[Not Available]|[Not Available]	[Not Applicable]	Thyroid Papillary Carcinoma - Classical/usual	[Not Applicable]	No	[Not Available]|[Not Available]	[Not Available]|[Not Available]	[Not Available]|[Not Available]	[Not Available]|[Not Available]	C73	mar-60	C73.9	YES	6	Ultrasound	YES	[Not Available]	[Not Available]	[Not Available]	2.4	4.2	2.4	NO	0	[Not Available]	[Not Applicable]	MX	N0
426	TCGA-FY-A3W9	66	[Not Applicable]	7EF22138-AC76-4846-B3BB-DDF1EFB96531	[Not Available]	[Not Applicable]	[Not Applicable]	[Not Applicable]	[Not Applicable]	2012-10-08	-24137	[Not Applicable]	0	23	[Not Applicable]	NOT HISPANIC OR LATINO	[Not Applicable]	None	[Not Available]	FEMALE	[Not Available]	[Not Available]|[Not Available]|[Not Available]	[Not Applicable]	Thyroid Papillary Carcinoma - Follicular (>= 99% follicular patterned)	[Not Applicable]	No	[Not Available]|[Not Available]	[Not Available]|[Not Available]	[Not Available]|[Not Available]	[Not Available]|[Not Available]	C73	mar-40	C73.9	YES	1	[Not Available]	NO	[Not Available]	[Not Available]	[Not Available]	1.3	2.3	1.4	NO	0	[Not Available]	[Not Applicable]	MX	N0
427	TCGA-FY-A3WA	52	[Not Applicable]	59221E3A-2927-40BF-A38D-4A5843EA179B	[Not Available]	[Not Applicable]	[Not Applicable]	[Not Applicable]	[Not Applicable]	2012-12-03	-18993	[Not Applicable]	0	29	[Not Applicable]	NOT HISPANIC OR LATINO	[Not Applicable]	None	[Not Available]	FEMALE	[Not Available]	[Not Available]|[Not Available]|[Not Available]	[Not Applicable]	Thyroid Papillary Carcinoma - Follicular (>= 99% follicular patterned)	[Not Applicable]	No	[Not Available]|[Not Available]	[Not Available]|[Not Available]	[Not Available]|[Not Available]	[Not Available]|[Not Available]	C73	mar-40	C73.9	YES	[Not Available]	[Not Available]	NO	[Not Available]	[Not Available]	[Not Available]	[Not Available]	0.5	[Not Available]	NO	[Not Available]	[Not Available]	[Not Applicable]	MX	NX
428	TCGA-FY-A3YR	64	[Not Applicable]	D2CC4D31-38FA-4232-895E-767260F607E9	[Not Available]	[Not Applicable]	[Not Applicable]	[Not Applicable]	[Not Applicable]	2012-10-08	-23407	[Not Applicable]	0	208	[Not Applicable]	NOT HISPANIC OR LATINO	[Not Applicable]	Minimal (T3)	[Not Available]	FEMALE	[Not Available]	[Not Available]|[Not Available]|[Not Available]	[Not Applicable]	Thyroid Papillary Carcinoma - Classical/usual	[Not Applicable]	No	151.2 mCi|[Not Available]	[Not Available]|[Not Available]	151.2 mCi|[Not Available]	rhTSH|[Not Available]	C73	mar-60	C73.9	YES	11	[Not Available]	NO	[Not Available]	[Not Available]	[Not Available]	1.2	1.7	1.3	NO	4	[Not Available]	[Not Applicable]	MX	N1a
429	TCGA-FY-A40K	46	[Not Applicable]	8A8E05AA-F13A-4142-A335-7AAFBEE7B664	[Not Available]	[Not Applicable]	[Not Applicable]	[Not Applicable]	[Not Applicable]	2012-10-17	-17106	[Not Applicable]	0	126	[Not Applicable]	NOT HISPANIC OR LATINO	[Not Applicable]	None	[Not Available]	FEMALE	[Not Available]	[Not Available]|[Not Available]|[Not Available]	[Not Applicable]	Thyroid Papillary Carcinoma - Classical/usual	[Not Applicable]	No	2 mCi|[Not Available]	[Not Available]|[Not Available]	2 mCi|[Not Available]	rhTSH|[Not Available]	C73	mar-60	C73.9	YES	4	[Not Available]	NO	[Not Available]	[Not Available]	[Not Available]	1.0	1.0	1.0	NO	0	[Not Available]	[Not Applicable]	MX	N0
430	TCGA-FY-A40L	55	[Not Applicable]	3FC062BC-1B0B-4C8F-B79C-770BCAA1EC6E	[Not Available]	[Not Applicable]	[Not Applicable]	[Not Applicable]	[Not Applicable]	2012-10-08	-20241	[Not Applicable]	0	199	[Not Applicable]	NOT HISPANIC OR LATINO	[Not Applicable]	Moderate/Advanced (T4a)	[Not Available]	FEMALE	[Not Available]	[Not Available]|[Not Available]|[Not Available]	[Not Applicable]	Thyroid Papillary Carcinoma - Classical/usual	[Not Applicable]	No	147.6 mCi|[Not Available]	[Not Available]|[Not Available]	147.6 mCi|[Not Available]	rhTSH|[Not Available]	C73	mar-60	C73.9	YES	3	[Not Available]	NO	[Not Available]	[Not Available]	[Not Available]	0.4	1.7	1.2	NO	2	[Not Available]	[Not Applicable]	MX	N1b
431	TCGA-FY-A40M	51	[Not Applicable]	744DF1F5-A7D5-4675-92CE-6E4713F0D541	[Not Available]	[Not Applicable]	[Not Applicable]	[Not Applicable]	[Not Applicable]	2012-10-17	-18717	[Not Applicable]	0	138	[Not Applicable]	NOT HISPANIC OR LATINO	[Not Applicable]	None	[Not Available]	FEMALE	[Not Available]	[Not Available]|[Not Available]|[Not Available]	[Not Applicable]	Thyroid Papillary Carcinoma - Classical/usual	[Not Applicable]	No	50.8 mCi|[Not Available]	[Not Available]|[Not Available]	50.8 mCi|[Not Available]	rhTSH|[Not Available]	C73	mar-60	C73.9	YES	5	[Not Available]	NO	[Not Available]	[Not Available]	[Not Available]	1.4	1.7	1.5	NO	0	[Not Available]	[Not Applicable]	MX	N0
432	TCGA-FY-A40N	55	[Not Applicable]	44C2DA7C-6975-4D09-B65C-4B30AFD019BB	[Not Available]	[Not Applicable]	[Not Applicable]	[Not Applicable]	[Not Applicable]	2012-10-08	-20331	[Not Applicable]	0	27	[Not Applicable]	NOT HISPANIC OR LATINO	[Not Applicable]	None	[Not Available]	FEMALE	[Not Available]	[Not Available]|[Not Available]|[Not Available]	[Not Applicable]	Thyroid Papillary Carcinoma - Follicular (>= 99% follicular patterned)	[Not Applicable]	No	[Not Available]|[Not Available]	[Not Available]|[Not Available]	[Not Available]|[Not Available]	[Not Available]|[Not Available]	C73	mar-40	C73.9	YES	3	[Not Available]	NO	[Not Available]	[Not Available]	[Not Available]	0.9	0.9	0.9	NO	0	[Not Available]	[Not Applicable]	MX	N0
433	TCGA-FY-A4B0	76	[Not Applicable]	6B529FB3-0B1B-4D3B-9309-BFCB063DBB71	[Not Available]	[Not Applicable]	[Not Applicable]	[Not Applicable]	[Not Applicable]	2013-02-21	-27941	[Not Applicable]	0	0	[Not Applicable]	NOT HISPANIC OR LATINO	[Not Applicable]	None	[Unknown]	MALE	[Not Available]	[Not Available]|[Not Available]|[Not Available]	[Not Applicable]	Thyroid Papillary Carcinoma - Classical/usual	[Not Applicable]	No	[Not Available]|[Not Available]	[Not Available]|[Not Available]	[Not Available]|[Not Available]	[Not Available]|[Not Available]	C73	mar-40	C73.9	YES	[Not Available]	Ultrasound	YES	[Not Available]	[Not Available]	[Not Available]	[Not Available]	1.0	[Not Available]	NO	[Not Available]	[Not Available]	[Not Applicable]	MX	NX
434	TCGA-FY-A4B3	51	[Not Applicable]	00B62DF6-1189-4E38-8601-70416E05550D	[Not Available]	[Not Applicable]	[Not Applicable]	[Not Applicable]	[Not Applicable]	2013-02-21	-18969	[Not Applicable]	0	41	[Not Applicable]	HISPANIC OR LATINO	[Not Applicable]	Minimal (T3)	[Unknown]	MALE	[Not Available]	[Not Available]|[Not Available]|[Not Available]	[Not Applicable]	Thyroid Papillary Carcinoma - Classical/usual	[Not Applicable]	No	[Not Available]|[Not Available]	[Not Available]|[Not Available]	[Not Available]|[Not Available]	[Not Available]|[Not Available]	C73	mar-60	C73.9	YES	4	[Not Available]	NO	[Not Available]	[Not Available]	[Not Available]	1.5	2.1	1.5	NO	4	[Not Available]	[Not Applicable]	MX	N1a
435	TCGA-FY-A4B4	62	[Not Applicable]	5C118E15-1E48-42A6-8D29-179E6E71A26C	[Not Available]	[Not Applicable]	[Not Applicable]	[Not Applicable]	[Not Applicable]	2013-02-21	-22829	[Not Applicable]	0	35	[Not Applicable]	NOT HISPANIC OR LATINO	[Not Applicable]	None	[Unknown]	FEMALE	[Not Available]	[Not Available]|[Not Available]|[Not Available]	[Not Applicable]	Thyroid Papillary Carcinoma - Classical/usual	[Not Applicable]	No	[Not Available]|[Not Available]	[Not Available]|[Not Available]	[Not Available]|[Not Available]	[Not Available]|[Not Available]	C73	mar-60	C73.9	YES	3	[Not Available]	NO	[Not Available]	[Not Available]	[Not Available]	[Not Available]	1.8	[Not Available]	NO	2	[Not Available]	[Not Applicable]	MX	N1a
436	TCGA-GE-A2C6	33	[Not Applicable]	7deedeba-f05b-453c-9df1-eeb20b0ec72e	[Not Available]	[Not Applicable]	[Not Applicable]	[Not Applicable]	[Not Applicable]	2011-10-20	-12067	[Not Applicable]	0	206	[Not Applicable]	NOT HISPANIC OR LATINO	[Not Applicable]	None	[Not Available]	FEMALE	NO	[Not Evaluated]|[Not Evaluated]|[Not Evaluated]	[Not Applicable]	Thyroid Papillary Carcinoma - Classical/usual	[Not Applicable]	No	[Not Available]	[Not Available]	[Not Available]	[Not Available]	C73	mar-60	C73.9	YES	23	CT with contrast|CT without contrast	YES	[Not Available]	[Not Available]	[Not Available]	1.4	2.2	2.5	[Not Available]	14	[Not Available]	[Not Applicable]	MX	N1b
437	TCGA-H2-A26U	54	[Not Applicable]	e61fb24b-613a-4b6d-bb2b-00ccedbd3dbc	[Not Available]	[Not Applicable]	[Not Applicable]	[Not Applicable]	[Not Applicable]	2011-08-08	-19927	[Not Applicable]	0	106	[Not Applicable]	NOT HISPANIC OR LATINO	[Not Applicable]	Minimal (T3)	Child	FEMALE	[Not Available]	[Not Available]|[Not Available]|[Not Available]	[Not Applicable]	Thyroid Papillary Carcinoma - Classical/usual	[Not Applicable]	No	[Not Available]	[Not Available]	[Not Available]	[Not Available]	C73	mar-60	C73.9	YES	7	[Not Available]	[Not Available]	[Not Available]	[Not Available]	[Not Available]	[Not Available]	[Not Available]	[Not Available]	[Not Available]	0	[Not Available]	[Not Applicable]	MX	N0
438	TCGA-H2-A2K9	25	[Not Applicable]	25D8A79E-15FD-4C8A-A7F6-05D78973B757	[Not Available]	[Not Applicable]	[Not Applicable]	[Not Applicable]	[Not Applicable]	2011-10-18	-9220	[Not Applicable]	0	145	[Not Applicable]	NOT HISPANIC OR LATINO	[Not Applicable]	None	[Not Available]	MALE	[Not Available]	[Not Available]|[Not Available]|[Not Available]	[Not Applicable]	Thyroid Papillary Carcinoma - Classical/usual	[Not Applicable]	No	[Not Available]	[Not Available]	[Not Available]	[Not Available]	C73	mar-60	C73.9	YES	14	[Not Available]	[Not Available]	[Not Available]	[Not Available]	[Not Available]	[Not Available]	[Not Available]	[Not Available]	[Not Available]	11	[Not Available]	[Not Applicable]	MX	N1b
439	TCGA-H2-A3RH	41	[Not Applicable]	0314B145-2F3A-4A90-A580-375B5F0A63A4	[Not Available]	[Not Applicable]	[Not Applicable]	[Not Applicable]	[Not Applicable]	2012-05-07	-15068	[Not Applicable]	0	148	[Not Applicable]	NOT HISPANIC OR LATINO	[Not Applicable]	None	[Not Available]	FEMALE	[Not Available]	[Not Available]|[Not Available]|[Not Available]	[Not Applicable]	Thyroid Papillary Carcinoma - Follicular (>= 99% follicular patterned)	[Not Applicable]	No	[Not Available]	[Not Available]	[Not Available]	[Not Available]	C73	mar-40	C73.9	YES	3	[Not Available]	[Not Available]	[Not Available]	[Not Available]	[Not Available]	[Not Available]	1.7	[Not Available]	[Not Available]	0	[Not Available]	[Not Applicable]	M0	N0
440	TCGA-H2-A3RI	29	[Not Applicable]	BF193C4F-FBAC-41BC-B1AF-19B6CE856F0F	[Not Available]	[Not Applicable]	[Not Applicable]	[Not Applicable]	[Not Applicable]	2012-05-07	-10956	[Not Applicable]	0	90	[Not Applicable]	NOT HISPANIC OR LATINO	[Not Applicable]	Minimal (T3)	[Not Available]	FEMALE	[Not Available]	[Not Available]|[Not Available]|[Not Available]	[Not Applicable]	Thyroid Papillary Carcinoma - Classical/usual	[Not Applicable]	No	[Not Available]	[Not Available]	[Not Available]	[Not Available]	C73	mar-60	C73.9	YES	5	[Not Available]	[Not Available]	[Not Available]	[Not Available]	[Not Available]	[Not Available]	2.7	[Not Available]	[Not Available]	0	[Not Available]	[Not Applicable]	MX	N0
441	TCGA-H2-A421	34	[Not Applicable]	80AEB61D-21CF-4804-90EA-5D22EB06E299	[Not Available]	[Not Applicable]	[Not Applicable]	[Not Applicable]	[Not Applicable]	2012-10-04	-12656	[Not Applicable]	0	67	[Not Applicable]	HISPANIC OR LATINO	[Not Applicable]	None	[Not Available]	FEMALE	[Not Available]	[Not Available]|[Not Available]|[Not Available]	[Not Applicable]	Thyroid Papillary Carcinoma - Classical/usual	[Not Applicable]	No	105.6|[Not Available]	[Not Available]|[Not Available]	[Not Available]|[Not Available]	Thyroxine withdrawal|[Not Available]	C73	mar-60	C73.9	YES	3	[Not Available]	NO	[Not Available]	[Not Available]	[Not Available]	1	1	1.5	NO	2	[Not Available]	[Not Applicable]	M0	N1a
442	TCGA-H2-A422	40	[Not Applicable]	8ED1B900-A8A8-4164-B96B-F060F15D7075	[Not Available]	[Not Applicable]	[Not Applicable]	[Not Applicable]	[Not Applicable]	2012-10-22	-14720	[Not Applicable]	0	88	[Not Applicable]	NOT HISPANIC OR LATINO	[Not Applicable]	None	[Not Available]	FEMALE	[Not Available]	[Not Available]|[Not Available]|[Not Available]	[Not Applicable]	Thyroid Papillary Carcinoma - Classical/usual	[Not Applicable]	No	100.1 mCi|[Not Available]	[Not Available]|[Not Available]	100.1 mCi|[Not Available]	Thyroxine withdrawal|[Not Available]	C73	mar-60	C73.9	YES	3	[Not Available]	NO	[Not Available]	[Not Available]	[Not Available]	[Not Available]	[Not Available]	[Not Available]	NO	0	[Not Available]	[Not Applicable]	MX	N0
443	TCGA-IM-A3EB	32	[Not Applicable]	3A7C35E0-9ED1-4098-8585-52F5991B2534	[Not Available]	[Not Applicable]	[Not Applicable]	[Not Applicable]	[Not Applicable]	2011-12-11	-11822	[Not Applicable]	0	1070	[Not Applicable]	HISPANIC OR LATINO	[Not Applicable]	Minimal (T3)	[Not Available]	FEMALE	[Not Available]	[Not Available]|[Not Available]|[Not Available]	[Not Applicable]	Thyroid Papillary Carcinoma - Classical/usual	[Not Applicable]	No	[Not Available]	[Not Available]	[Not Available]	[Not Available]	C73	mar-60	C73.9	YES	12	Ultrasound	YES	[Not Available]	[Not Available]	[Not Available]	2	3	2	[Not Available]	3	[Not Available]	[Not Applicable]	MX	N1a
444	TCGA-IM-A3ED	58	[Not Applicable]	D2A8035C-A8D3-4038-8A9D-854F2208BC45	[Not Available]	[Not Applicable]	[Not Applicable]	[Not Applicable]	[Not Applicable]	2011-12-11	-21278	[Not Applicable]	0	939	[Not Applicable]	HISPANIC OR LATINO	[Not Applicable]	None	[Not Available]	FEMALE	NO	[Not Available]|[Not Available]|[Not Available]	[Not Applicable]	Thyroid Papillary Carcinoma - Classical/usual	[Not Applicable]	No	[Not Available]	[Not Available]	[Not Available]	[Not Available]	C73	mar-60	C73.9	YES	9	Ultrasound	YES	[Not Available]	[Not Available]	[Not Available]	0.7	1.7	1.5	[Not Available]	0	[Not Available]	[Not Applicable]	MX	N0
445	TCGA-IM-A3U2	89	[Not Applicable]	8392EDEA-82B3-4610-87A0-F545F673E922	[Not Available]	[Not Applicable]	[Not Applicable]	[Not Applicable]	[Not Applicable]	2012-05-24	-32682	[Not Applicable]	0	80	[Not Applicable]	HISPANIC OR LATINO	[Not Applicable]	Minimal (T3)	[Not Available]	FEMALE	NO	[Not Available]|[Not Available]|[Not Available]	[Not Applicable]	Thyroid Papillary Carcinoma - Tall Cell (>= 50% tall cell features)	[Not Applicable]	No	[Not Available]	[Not Available]	[Not Available]	[Not Available]	C73	mar-44	C73.9	YES	33	MRI with contrast	YES	[Not Available]	[Not Available]	[Not Available]	2.5	4.3	3.5	[Not Available]	25	[Not Available]	[Not Applicable]	MX	N1b
446	TCGA-IM-A3U3	55	[Not Applicable]	DD1058C5-DA32-4F60-9275-5E1A8049D9C5	[Not Available]	[Not Applicable]	[Not Applicable]	[Not Applicable]	[Not Applicable]	2012-05-24	-20117	[Not Applicable]	0	99	[Not Applicable]	HISPANIC OR LATINO	[Not Applicable]	None	[Not Available]	FEMALE	NO	[Not Available]|[Not Available]|[Not Available]	[Not Applicable]	Thyroid Papillary Carcinoma - Tall Cell (>= 50% tall cell features)	[Not Applicable]	No	[Not Available]	[Not Available]	[Not Available]	[Not Available]	C73	mar-44	C73.9	YES	8	Ultrasound	YES	[Not Available]	[Not Available]	[Not Available]	0.7	1.3	1	[Not Available]	0	[Not Available]	[Not Applicable]	MX	N0
447	TCGA-IM-A41Y	42	[Not Applicable]	541406FA-4443-4094-A303-43913D96F016	[Not Available]	[Not Applicable]	[Not Applicable]	[Not Applicable]	[Not Applicable]	2013-03-07	-15694	[Not Applicable]	0	298	[Not Applicable]	HISPANIC OR LATINO	[Not Applicable]	Minimal (T3)	[Not Available]	FEMALE	NO	[Not Available]|[Not Available]|[Not Available]	[Not Applicable]	Other specify	Diffuse sclerosing variant	No	205 mCi|[Not Available]	[Not Available]|[Not Available]	[Not Available]|[Not Available]	rhTSH|[Not Available]	C73	mar-50	C73.9	YES	18	Ultrasound|CT with contrast	YES	[Not Available]	[Not Available]	[Not Available]	4	8	8	NO	4	[Not Available]	[Not Applicable]	MX	N1a
448	TCGA-IM-A41Z	37	[Not Applicable]	9348C35A-58BA-4DB5-BC4A-E9FC8E07CDF3	[Not Available]	[Not Applicable]	[Not Applicable]	[Not Applicable]	[Not Applicable]	2013-02-01	-13704	[Not Applicable]	0	293	[Not Applicable]	HISPANIC OR LATINO	[Not Applicable]	None	[Not Available]	FEMALE	[Not Available]	[Not Available]|[Not Available]|[Not Available]	[Not Applicable]	Thyroid Papillary Carcinoma - Follicular (>= 99% follicular patterned)	[Not Applicable]	No	102 mCi|[Not Available]	[Not Available]|[Not Available]	[Not Available]|[Not Available]	rhTSH|[Not Available]	C73	mar-40	C73.9	YES	20	Ultrasound	YES	[Not Available]	[Not Available]	[Not Available]	1.0	4.5	2.5	NO	1	[Not Available]	[Not Applicable]	MX	N0
449	TCGA-IM-A420	39	[Not Applicable]	E28E35B1-EB58-45BB-B19A-958187227500	[Not Available]	[Not Applicable]	[Not Applicable]	[Not Applicable]	[Not Applicable]	2013-02-01	-14331	[Not Applicable]	0	90	[Not Applicable]	HISPANIC OR LATINO	[Not Applicable]	None	[Not Available]	FEMALE	[Not Available]	[Not Available]|[Not Available]|[Not Available]	[Not Applicable]	Thyroid Papillary Carcinoma - Classical/usual	[Not Applicable]	No	[Not Available]|[Not Available]	[Not Available]|[Not Available]	[Not Available]|[Not Available]	Patient did not receive I-131 treatment|[Not Available]	C73	mar-60	C73.9	YES	14	[Not Available]	NO	[Not Available]	[Not Available]	[Not Available]	2	5	4	NO	5	[Not Available]	[Not Applicable]	MX	N1a
450	TCGA-IM-A4EB	37	[Not Applicable]	38D03E42-DB98-43BC-BB3D-2580CF55A681	[Not Available]	[Not Applicable]	[Not Applicable]	[Not Applicable]	[Not Applicable]	2013-03-06	-13634	[Not Applicable]	0	263	[Not Applicable]	HISPANIC OR LATINO	[Not Applicable]	Minimal (T3)	[Not Available]	MALE	[Unknown]	[Not Available]|[Not Available]|[Not Available]	[Not Applicable]	Other specify	Diffuse Sclerosing Variant	No	149.8 mCi|[Not Available]	[Not Available]|[Not Available]	[Not Available]|[Not Available]	rhTSH|[Not Available]	C73	mar-50	C73.9	YES	11	Ultrasound	YES	[Not Available]	[Not Available]	[Not Available]	1.8	3	2	NO	9	[Not Available]	[Not Applicable]	MX	N1b
451	TCGA-J8-A3NZ	52	[Not Applicable]	430AD51D-F68C-40B2-BFA2-9DA68370B7FA	[Not Available]	[Not Applicable]	[Not Applicable]	[Not Applicable]	[Not Applicable]	2012-04-17	-19058	[Not Applicable]	0	68	[Not Applicable]	NOT HISPANIC OR LATINO	[Not Applicable]	Minimal (T3)	[Not Available]	FEMALE	NO	[Not Evaluated]|[Not Evaluated]|[Not Evaluated]	[Not Applicable]	Thyroid Papillary Carcinoma - Classical/usual	[Not Applicable]	No	[Not Available]	[Not Available]	[Not Available]	[Not Available]	C73	mar-60	C73.9	YES	9	Ultrasound	YES	[Not Available]	[Not Available]	[Not Available]	[Not Available]	3.5	[Not Available]	[Not Available]	2	[Not Available]	[Not Applicable]	M0	N1a
452	TCGA-J8-A3O0	38	[Not Applicable]	5832C002-E5A4-45BC-B8F9-DBB841FD22F3	[Not Available]	[Not Applicable]	[Not Applicable]	[Not Applicable]	[Not Applicable]	2012-02-11	-14214	[Not Applicable]	0	392	[Not Applicable]	NOT HISPANIC OR LATINO	[Not Applicable]	None	[Not Available]	MALE	NO	[Not Available]|[Not Available]|[Not Available]	[Not Applicable]	Thyroid Papillary Carcinoma - Classical/usual	[Not Applicable]	No	[Not Available]	[Not Available]	[Not Available]	[Not Available]	C73	mar-40	C73.9	YES	3	[Not Available]	NO	[Not Available]	[Not Available]	[Not Available]	2.5	2.8	2.7	[Not Available]	0	[Not Available]	[Not Applicable]	M0	N0
453	TCGA-J8-A3O1	33	[Not Applicable]	FB14BD0D-B356-42A4-A0E9-2FCDADA8F76B	Negative	[Not Applicable]	[Not Applicable]	[Not Applicable]	[Not Applicable]	2012-02-11	-12112	[Not Applicable]	0	415	[Not Applicable]	HISPANIC OR LATINO	[Not Applicable]	None	[Not Available]	FEMALE	NO	No BRAF Mutation Detected|[Not Available]|[Not Available]	[Not Applicable]	Thyroid Papillary Carcinoma - Classical/usual	[Not Applicable]	No	[Not Available]	[Not Available]	[Not Available]	[Not Available]	C73	mar-60	C73.9	YES	19	[Not Available]	[Not Available]	[Not Available]	[Not Available]	[Not Available]	[Not Available]	6.5	[Not Available]	[Not Available]	12	[Not Available]	[Not Applicable]	M0	N1b
454	TCGA-J8-A3O2	39	[Not Applicable]	039BFC94-FADD-440A-AADE-A1595128583E	[Not Available]	[Not Applicable]	[Not Applicable]	[Not Applicable]	[Not Applicable]	2012-02-11	-14339	[Not Applicable]	0	41	[Not Applicable]	NOT HISPANIC OR LATINO	[Not Applicable]	Minimal (T3)	[Not Available]	MALE	NO	[Not Available]|[Not Available]|[Not Available]	[Not Applicable]	Thyroid Papillary Carcinoma - Classical/usual	[Not Applicable]	No	[Not Available]	[Not Available]	[Not Available]	[Not Available]	C73	mar-60	C73.9	YES	106	Ultrasound|CT with contrast	YES	[Not Available]	[Not Available]	[Not Available]	[Not Available]	3.5	[Not Available]	[Not Available]	23	[Not Available]	[Not Applicable]	M0	N1b
455	TCGA-J8-A3YD	47	[Not Applicable]	4E227A7A-B885-4E9B-A4C2-AAD9E6C154E5	negative	[Not Applicable]	[Not Applicable]	[Not Applicable]	[Not Applicable]	2012-09-26	-17415	[Not Applicable]	0	968	[Not Applicable]	[Unknown]	[Not Applicable]	None	[Not Available]	FEMALE	NO	No BRAF Mutation Detected|[Not Evaluated]|[Not Evaluated]	[Not Applicable]	Thyroid Papillary Carcinoma - Classical/usual	[Not Applicable]	No	152 millicuries|[Not Available]	[Not Available]|[Not Available]	152 millicuries|[Not Available]	Thyroxine withdrawal|[Not Available]	C73	mar-60	C73.9	YES	6	Ultrasound	YES	[Not Available]	[Not Available]	[Not Available]	0.8	1.5	1.0	NO	2	[Not Available]	[Not Applicable]	M0	N1a
456	TCGA-J8-A3YE	31	[Not Applicable]	C93C47F4-88F3-405A-85F4-BA9450B74522	[Not Available]	[Not Applicable]	[Not Applicable]	[Not Applicable]	[Not Applicable]	2012-09-27	-11446	[Not Applicable]	0	846	[Not Applicable]	[Not Evaluated]	[Not Applicable]	Minimal (T3)	[Not Available]	FEMALE	NO	[Not Evaluated]|[Not Evaluated]|[Not Evaluated]	[Not Applicable]	Thyroid Papillary Carcinoma - Classical/usual	[Not Applicable]	No	142.5|[Not Available]	[Not Available]|[Not Available]	142.5|[Not Available]	Thyroxine withdrawal|[Not Available]	C73	mar-60	C73.9	YES	4	Ultrasound	YES	[Not Available]	[Not Available]	[Not Available]	[Not Available]	3.5	[Not Available]	NO	1	[Not Available]	[Not Applicable]	M0	N1
457	TCGA-J8-A3YF	83	[Not Applicable]	00D588E3-3DB6-4CF3-9DEF-34D941E8CDB0	Negative	[Not Applicable]	[Not Applicable]	[Not Applicable]	[Not Applicable]	2012-12-03	-30661	[Not Applicable]	0	751	[Not Applicable]	NOT HISPANIC OR LATINO	[Not Applicable]	None	[Not Available]	MALE	NO	No BRAF Mutation Detected|[Not Evaluated]|[Not Evaluated]	[Not Applicable]	Thyroid Papillary Carcinoma - Classical/usual	[Not Applicable]	No	156 mCi|[Not Available]	[Not Available]|[Not Available]	156 mCi|[Not Available]	Thyroxine withdrawal|[Not Available]	C73	mar-60	C73.9	YES	21	Ultrasound|CT with contrast	YES	[Not Available]	[Not Available]	[Not Available]	[Not Available]	0.5	[Not Available]	NO	1	[Not Available]	[Not Applicable]	M0	N1
458	TCGA-J8-A3YG	54	[Not Applicable]	9AA61AB5-F675-43DD-8A99-077164B41F30	positive	[Not Applicable]	[Not Applicable]	[Not Applicable]	[Not Applicable]	2012-09-26	-19785	[Not Applicable]	0	678	[Not Applicable]	[Not Evaluated]	[Not Applicable]	None	[Not Available]	FEMALE	YES	[Not Available]|[Not Evaluated]|[Not Evaluated]	[Not Applicable]	Thyroid Papillary Carcinoma - Classical/usual	[Not Applicable]	No	157 millicuries|[Not Available]	[Not Available]|[Not Available]	157 millicuries|[Not Available]	Thyroxine withdrawal|[Not Available]	C73	mar-60	C73.9	YES	9	Ultrasound|CT with contrast	YES	[Not Available]	[Not Available]	[Not Available]	1.6	2.5	2.0	NO	6	[Not Available]	[Not Applicable]	M0	N1a
459	TCGA-J8-A3YH	39	[Not Applicable]	A09B20B5-C187-4632-B996-0D5314A9885C	[Not Available]	[Not Applicable]	[Not Applicable]	[Not Applicable]	[Not Applicable]	2012-12-03	-14470	[Not Applicable]	0	174	[Not Applicable]	[Not Evaluated]	[Not Applicable]	None	[Not Available]	MALE	NO	[Not Evaluated]|[Not Evaluated]|[Not Evaluated]	[Not Applicable]	Thyroid Papillary Carcinoma - Classical/usual	[Not Applicable]	No	155 millicuries|[Not Available]	[Not Available]|[Not Available]	155 millicuries|[Not Available]	Thyroxine withdrawal|[Not Available]	C73	mar-60	C73.9	YES	40	Ultrasound	YES	[Not Available]	[Not Available]	[Not Available]	[Not Available]	4.5	[Not Available]	NO	13	[Not Available]	[Not Applicable]	M0	N1b
460	TCGA-J8-A42S	45	[Not Applicable]	63C20D30-3BC9-4DCA-8A8D-09FDEA41F288	[Not Available]	[Not Applicable]	[Not Applicable]	[Not Applicable]	[Not Applicable]	2012-12-03	-16609	[Not Applicable]	0	75	[Not Applicable]	[Not Evaluated]	[Not Applicable]	None	[Not Available]	MALE	NO	[Not Evaluated]|[Not Evaluated]|[Not Evaluated]	[Not Applicable]	Thyroid Papillary Carcinoma - Classical/usual	[Not Applicable]	No	[Not Available]|[Not Available]	[Not Available]|[Not Available]	[Not Available]|[Not Available]	Patient did not receive I-131 treatment|[Not Available]	C73	mar-60	C73.9	YES	1	Ultrasound	YES	[Not Available]	[Not Available]	[Not Available]	[Not Available]	1.5	[Not Available]	NO	1	[Not Available]	[Not Applicable]	MX	N1a
461	TCGA-J8-A4HW	59	[Not Applicable]	FD3315DA-C870-4AD0-9D2A-50B1647D3E46	[Not Available]	[Not Applicable]	[Not Applicable]	[Not Applicable]	[Not Applicable]	2013-03-09	-21587	[Not Applicable]	0	79	[Not Applicable]	[Unknown]	[Not Applicable]	None	Parent	FEMALE	[Unknown]	[Not Evaluated]|[Not Evaluated]|[Not Evaluated]	[Not Applicable]	Thyroid Papillary Carcinoma - Classical/usual	[Not Applicable]	No	102.4 millicuries|[Not Available]	[Not Available]|[Not Available]	102.4 millicuries|[Not Available]	rhTSH|[Not Available]	C73	mar-60	C73.9	YES	8	Ultrasound	YES	[Not Available]	[Not Available]	[Not Available]	[Not Available]	3.0	[Not Available]	NO	7	[Not Available]	[Not Applicable]	M0	N1
462	TCGA-J8-A4HY	68	[Not Applicable]	2AE6A00C-BC6E-42FE-A0CB-40339D5FDC73	[Not Available]	[Not Applicable]	[Not Applicable]	[Not Applicable]	[Not Applicable]	2013-03-11	-25106	[Not Applicable]	0	6	[Not Applicable]	HISPANIC OR LATINO	[Not Applicable]	Moderate/Advanced (T4a)	[Not Available]	FEMALE	NO	[Not Evaluated]|[Not Evaluated]|[Not Evaluated]	[Not Applicable]	Thyroid Papillary Carcinoma - Classical/usual	[Not Applicable]	No	[Not Available]|[Not Available]	[Not Available]|[Not Available]	[Not Available]|[Not Available]	[Not Available]|[Not Available]	C73	mar-60	C73.9	YES	40	Ultrasound|CT with contrast|MRI with contrast	YES	[Not Available]	[Not Available]	[Not Available]	[Not Available]	6.5	[Not Available]	NO	13	[Not Available]	[Not Applicable]	MX	N1b
463	TCGA-KS-A41F	37	[Not Applicable]	8E274B77-C05E-4A8C-A106-C552DF1F2D11	[Not Available]	[Not Applicable]	[Not Applicable]	[Not Applicable]	[Not Applicable]	2012-12-10	-13544	[Not Applicable]	0	3680	[Not Applicable]	[Not Evaluated]	[Not Applicable]	None	[Not Available]	FEMALE	[Not Available]	[Not Available]|[Not Available]|[Not Available]	[Not Applicable]	Thyroid Papillary Carcinoma - Classical/usual	[Not Applicable]	No	[Not Available]|[Not Available]	[Not Available]|[Not Available]	[Not Available]|[Not Available]	[Not Available]|[Not Available]	C73	mar-60	C73.9	YES	7	[Not Available]	NO	[Not Available]	[Not Available]	[Not Available]	1.7	2.2	1.9	NO	4	[Not Available]	[Not Applicable]	M0	N1
464	TCGA-KS-A41I	47	[Not Applicable]	754866EA-D5CA-451A-98E4-6E0C430D3652	[Not Available]	[Not Applicable]	[Not Applicable]	[Not Applicable]	[Not Applicable]	2012-12-10	-17196	[Not Applicable]	0	485	[Not Applicable]	[Not Evaluated]	[Not Applicable]	None	[Not Available]	FEMALE	[Not Available]	[Not Available]|[Not Available]|[Not Available]	[Not Applicable]	Thyroid Papillary Carcinoma - Follicular (>= 99% follicular patterned)	[Not Applicable]	No	[Not Available]|[Not Available]	[Not Available]|[Not Available]	[Not Available]|[Not Available]	[Not Available]|[Not Available]	C73	mar-40	C73.9	YES	[Not Available]	CT with contrast	YES	[Not Available]	[Not Available]	[Not Available]	1.0	2.0	1.5	NO	0	[Not Available]	[Not Applicable]	M0	N0
465	TCGA-KS-A41J	28	[Not Applicable]	23AD7900-4E99-4ABF-82FF-71EDEAA8A51C	[Not Available]	[Not Applicable]	[Not Applicable]	[Not Applicable]	[Not Applicable]	2012-12-10	-10410	[Not Applicable]	0	477	[Not Applicable]	[Not Evaluated]	[Not Applicable]	None	[Not Available]	FEMALE	[Not Available]	[Not Available]|[Not Available]|[Not Available]	[Not Applicable]	Thyroid Papillary Carcinoma - Classical/usual	[Not Applicable]	No	[Not Available]|[Not Available]	[Not Available]|[Not Available]	[Not Available]|[Not Available]	[Not Available]|[Not Available]	C73	mar-60	C73.9	YES	2	[Not Available]	NO	[Not Available]	[Not Available]	[Not Available]	1.8	2.3	2.1	NO	2	[Not Available]	[Not Applicable]	M0	N1
466	TCGA-KS-A41L	39	[Not Applicable]	4BD61E82-5168-4222-A8C8-5124AB8FDD44	[Not Available]	[Not Applicable]	[Not Applicable]	[Not Applicable]	[Not Applicable]	2012-12-10	-14440	[Not Applicable]	0	2637	[Not Applicable]	[Not Evaluated]	[Not Applicable]	None	[Not Available]	FEMALE	[Not Available]	[Not Available]|[Not Available]|[Not Available]	[Not Applicable]	Thyroid Papillary Carcinoma - Follicular (>= 99% follicular patterned)	[Not Applicable]	No	[Not Available]|[Not Available]	[Not Available]|[Not Available]	[Not Available]|[Not Available]	[Not Available]|[Not Available]	C73	mar-40	C73.9	YES	3	[Not Available]	NO	[Not Available]	[Not Available]	[Not Available]	1.5	3.2	2.0	NO	0	[Not Available]	[Not Applicable]	M0	N0
467	TCGA-KS-A4I1	37	[Not Applicable]	6FF5C8BD-9929-43EE-B53C-3C7C0B23F97B	[Not Available]	[Not Applicable]	[Not Applicable]	[Not Applicable]	[Not Applicable]	2013-01-14	-13538	[Not Applicable]	0	182	[Not Applicable]	[Not Evaluated]	[Not Applicable]	None	[Unknown]	FEMALE	[Not Available]	[Not Available]|[Not Available]|[Not Available]	[Not Applicable]	Thyroid Papillary Carcinoma - Classical/usual	[Not Applicable]	No	150 mCi|[Not Available]	[Not Available]|[Not Available]	[Not Available]|[Not Available]	Thyroxine withdrawal|[Not Available]	C73	mar-60	C73.9	YES	4	[Not Available]	[Unknown]	[Not Available]	[Not Available]	[Not Available]	[Not Available]	2.2	[Not Available]	NO	0	[Not Available]	[Not Applicable]	M0	N0
468	TCGA-KS-A4I3	41	[Not Applicable]	F9DB9757-04D8-40BD-A58D-605F4255B0E6	[Not Available]	[Not Applicable]	[Not Applicable]	[Not Applicable]	[Not Applicable]	2013-01-14	-14992	[Not Applicable]	0	366	[Not Applicable]	[Not Evaluated]	[Not Applicable]	[Unknown]	[Not Available]	MALE	[Not Available]	[Not Available]|[Not Available]|[Not Available]	[Not Applicable]	Thyroid Papillary Carcinoma - Classical/usual	[Not Applicable]	No	150 mCi|[Not Available]	[Not Available]|[Not Available]	[Not Available]|[Not Available]	Thyroxine withdrawal|[Not Available]	C73	mar-60	C73.9	YES	8	[Not Available]	NO	[Not Available]	[Not Available]	[Not Available]	1.3	1.5	1.5	NO	8	[Not Available]	[Not Applicable]	M0	N1
469	TCGA-KS-A4I5	49	[Not Applicable]	E94DFD42-4FE4-48E9-AA62-422AE071413F	[Not Available]	[Not Applicable]	[Not Applicable]	[Not Applicable]	[Not Applicable]	2013-01-14	-17963	[Not Applicable]	0	204	[Not Applicable]	[Not Evaluated]	[Not Applicable]	None	[Not Available]	FEMALE	[Not Available]	[Not Available]|[Not Available]|[Not Available]	[Not Applicable]	Thyroid Papillary Carcinoma - Classical/usual	[Not Applicable]	No	150 mCi|[Not Available]	[Not Available]|[Not Available]	[Not Available]|[Not Available]	[Not Available]|[Not Available]	C73	mar-60	C73.9	YES	2	[Not Available]	[Unknown]	[Not Available]	[Not Available]	[Not Available]	0.8	1.2	1.7	NO	0	[Not Available]	[Not Applicable]	M0	N1b
470	TCGA-KS-A4I7	61	[Not Applicable]	E0174496-D774-4417-81D1-CB16771760AD	[Not Available]	[Not Applicable]	[Not Applicable]	[Not Applicable]	[Not Applicable]	2013-01-15	-22397	[Not Applicable]	0	376	[Not Applicable]	[Not Evaluated]	[Not Applicable]	None	[Not Available]	FEMALE	[Not Available]	[Not Available]|[Not Available]|[Not Available]	[Not Applicable]	Thyroid Papillary Carcinoma - Classical/usual	[Not Applicable]	No	30 mCi|[Not Available]	[Not Available]|[Not Available]	[Not Available]|[Not Available]	Thyroxine withdrawal|[Not Available]	C73	mar-60	C73.9	YES	4	Ultrasound	YES	[Not Available]	[Not Available]	[Not Available]	1.2	1.5	1.0	NO	0	[Not Available]	[Not Applicable]	M0	N0
471	TCGA-KS-A4I9	46	[Not Applicable]	52BC133B-8A10-4C9B-ADC3-22910A191E6B	[Not Available]	[Not Applicable]	[Not Applicable]	[Not Applicable]	[Not Applicable]	2013-01-15	-16961	[Not Applicable]	0	530	[Not Applicable]	[Not Evaluated]	[Not Applicable]	None	[Not Available]	FEMALE	[Not Available]	[Not Available]|[Not Available]|[Not Available]	[Not Applicable]	Thyroid Papillary Carcinoma - Classical/usual	[Not Applicable]	No	30 mCi|[Not Available]	[Not Available]|[Not Available]	[Not Available]|[Not Available]	[Not Available]|[Not Available]	C73	mar-60	C73.9	YES	5	[Not Available]	NO	[Not Available]	[Not Available]	[Not Available]	1.6	1.7	1.3	NO	0	[Not Available]	[Not Applicable]	M0	N0
472	TCGA-KS-A4IB	41	[Not Applicable]	D3D9CCDD-4789-43B0-8E73-B2C42CB7D83D	[Not Available]	[Not Applicable]	[Not Applicable]	[Not Applicable]	[Not Applicable]	2013-01-15	-15157	[Not Applicable]	0	1963	[Not Applicable]	[Not Evaluated]	[Not Applicable]	None	[Not Available]	FEMALE	[Not Available]	[Not Available]|[Not Available]|[Not Available]	[Not Applicable]	Thyroid Papillary Carcinoma - Classical/usual	[Not Applicable]	No	30 mCi|[Not Available]	[Not Available]|[Not Available]	[Not Available]|[Not Available]	[Unknown]|[Not Available]	C73	mar-60	C73.9	YES	7	[Not Available]	[Unknown]	[Not Available]	[Not Available]	[Not Available]	1.7	3.2	2.6	NO	2	[Not Available]	[Not Applicable]	M0	N1
473	TCGA-KS-A4IC	45	[Not Applicable]	4D30606F-3AB6-4EF0-9991-8897CDB9960B	[Not Available]	[Not Applicable]	[Not Applicable]	[Not Applicable]	[Not Applicable]	2013-01-15	-16671	[Not Applicable]	0	447	[Not Applicable]	[Not Evaluated]	[Not Applicable]	None	[Not Available]	FEMALE	[Not Available]	[Not Available]|[Not Available]|[Not Available]	[Not Applicable]	Thyroid Papillary Carcinoma - Classical/usual	[Not Applicable]	No	50 mCi|[Not Available]	[Not Available]|[Not Available]	[Not Available]|[Not Available]	[Not Available]|[Not Available]	C73	mar-60	C73.9	YES	4	Ultrasound	YES	[Not Available]	[Not Available]	[Not Available]	1.0	1.1	1.1	NO	2	[Not Available]	[Not Applicable]	M0	N1a
474	TCGA-KS-A4ID	55	[Not Applicable]	899ED323-4FD1-4D8D-9C2F-C63D9B44E875	[Not Available]	[Not Applicable]	[Not Applicable]	[Not Applicable]	[Not Applicable]	2013-01-15	-20412	[Not Applicable]	0	623	[Not Applicable]	[Not Evaluated]	[Not Applicable]	None	[Not Available]	FEMALE	[Not Available]	[Not Available]|[Not Available]|[Not Available]	[Not Applicable]	Thyroid Papillary Carcinoma - Follicular (>= 99% follicular patterned)	[Not Applicable]	No	[Not Available]|[Not Available]	[Not Available]|[Not Available]	[Not Available]|[Not Available]	[Not Available]|[Not Available]	C73	mar-40	C73.9	YES	13	[Not Available]	[Unknown]	[Not Available]	[Not Available]	[Not Available]	1.0	1.3	1.2	NO	0	[Not Available]	[Not Applicable]	M0	N0
476	TCGA-L6-A4EQ	47	[Not Applicable]	D684399E-46C4-4BAD-92E9-3DE17C9F9A5F	[Not Available]	[Not Applicable]	[Not Applicable]	[Not Applicable]	[Not Applicable]	2013-01-16	-17350	[Not Applicable]	0	361	[Not Applicable]	NOT HISPANIC OR LATINO	[Not Applicable]	None	[Not Available]	MALE	NO	[Not Evaluated]|[Not Evaluated]|[Not Evaluated]	[Not Applicable]	Thyroid Papillary Carcinoma - Classical/usual	[Not Applicable]	No	100 mCi|[Not Available]	[Not Available]|[Not Available]	[Not Available]|[Not Available]	Thyroxine withdrawal|[Not Available]	C73	mar-60	C73.9	YES	1	Ultrasound	YES	[Not Available]	[Not Available]	[Not Available]	2.2	3.5	3.2	NO	1	[Not Available]	[Not Applicable]	M0	N1a
477	TCGA-L6-A4ET	49	[Not Applicable]	E1FF7694-64E1-47ED-B0D8-34ACFB4FFEF1	[Not Available]	[Not Applicable]	[Not Applicable]	[Not Applicable]	[Not Applicable]	2013-01-16	-17978	[Not Applicable]	0	34	[Not Applicable]	NOT HISPANIC OR LATINO	[Not Applicable]	None	[Not Available]	FEMALE	NO	[Not Evaluated]|[Not Evaluated]|[Not Evaluated]	[Not Applicable]	Thyroid Papillary Carcinoma - Follicular (>= 99% follicular patterned)	[Not Applicable]	No	156.5 mCi|[Not Available]	[Not Available]|[Not Available]	[Not Available]|[Not Available]	Thyroxine withdrawal|[Not Available]	C73	mar-40	C73.9	YES	[Not Available]	Ultrasound	YES	Lung	Biopsy Proven	[Not Available]	2.5	6.0	3.0	NO	[Not Available]	[Not Available]	[Not Applicable]	M1	NX
478	TCGA-L6-A4EU	58	[Not Applicable]	B555B7A4-6324-4D3E-9EED-B140AF6C768A	[Not Available]	[Not Applicable]	[Not Applicable]	[Not Applicable]	[Not Applicable]	2013-01-16	-21192	[Not Applicable]	0	22	[Not Applicable]	NOT HISPANIC OR LATINO	[Not Applicable]	Minimal (T3)	[Not Available]	FEMALE	NO	[Not Evaluated]|[Not Evaluated]|[Not Evaluated]	[Not Applicable]	Thyroid Papillary Carcinoma - Tall Cell (>= 50% tall cell features)	[Not Applicable]	No	104.1mCi|[Not Available]	[Not Available]|[Not Available]	[Not Available]|[Not Available]	Thyroxine withdrawal|[Not Available]	C73	mar-44	C73.9	YES	33	Ultrasound	YES	[Not Available]	[Not Available]	[Not Available]	4.0	5.0	4.5	NO	4	[Not Available]	[Not Applicable]	M0	N1a
479	TCGA-MK-A4N6	35	[Not Applicable]	DD478399-D2EC-4AE4-A82A-B0258D24D088	[Not Available]	[Not Applicable]	[Not Applicable]	[Not Applicable]	[Not Applicable]	2012-08-27	-12904	[Not Applicable]	0	505	[Not Applicable]	HISPANIC OR LATINO	[Not Applicable]	[Not Available]	[Not Available]	MALE	NO	[Not Evaluated]|[Not Evaluated]|[Not Evaluated]	[Not Applicable]	Thyroid Papillary Carcinoma - Classical/usual	[Not Applicable]	No	128mCi|[Not Available]	[Not Available]|[Not Available]	[Not Available]|[Not Available]	Thyroxine withdrawal|[Not Available]	C73	mar-60	C73.9	YES	77	CT with contrast	YES	[Not Available]	[Not Available]	[Not Available]	4.6	8.2	5.5	NO	40	[Not Available]	[Not Applicable]	M0	N1b
480	TCGA-MK-A4N7	20	[Not Applicable]	F0BC4F65-211B-4AE1-8E68-AAEF3F3C6DB8	[Not Available]	[Not Applicable]	[Not Applicable]	[Not Applicable]	[Not Applicable]	2012-08-27	-7570	[Not Applicable]	0	440	[Not Applicable]	HISPANIC OR LATINO	[Not Applicable]	None	[Not Available]	FEMALE	NO	[Not Evaluated]|[Not Evaluated]|[Not Evaluated]	[Not Applicable]	Thyroid Papillary Carcinoma - Classical/usual	[Not Applicable]	No	100mCi|[Not Available]	[Not Available]|[Not Available]	[Not Available]|[Not Available]	Thyroxine withdrawal|[Not Available]	C73	mar-60	C73.9	YES	2	Ultrasound	YES	[Not Available]	[Not Available]	[Not Available]	1.8	2.5	2.3	NO	0	[Not Available]	[Not Applicable]	M0	N0
481	TCGA-MK-A4N9	41	[Not Applicable]	25184E51-1464-438A-80FF-CFC9A443CD36	[Not Available]	[Not Applicable]	[Not Applicable]	[Not Applicable]	[Not Applicable]	2012-08-27	-15255	[Not Applicable]	0	265	[Not Applicable]	HISPANIC OR LATINO	[Not Applicable]	[Not Available]	[Not Available]	FEMALE	NO	[Not Evaluated]|[Not Evaluated]|[Not Evaluated]	[Not Applicable]	Thyroid Papillary Carcinoma - Classical/usual	[Not Applicable]	No	123mCi|[Not Available]	[Not Available]|[Not Available]	[Not Available]|[Not Available]	Thyroxine withdrawal|[Not Available]	C73	mar-60	C73.9	YES	9	Ultrasound	YES	[Not Available]	[Not Available]	[Not Available]	1.6	3.0	2.6	NO	1	[Not Available]	[Not Applicable]	M0	N1
[truncated: 48 more columns]
